# Supplementary material
Source: MDPI journal article supplement (https://www.mdpi.com/1999-4907/15/3/473)
Supplement: s1 [file s1 › Figures.pdf]

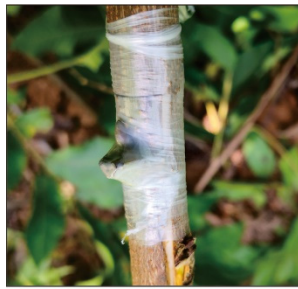

Budding in the field

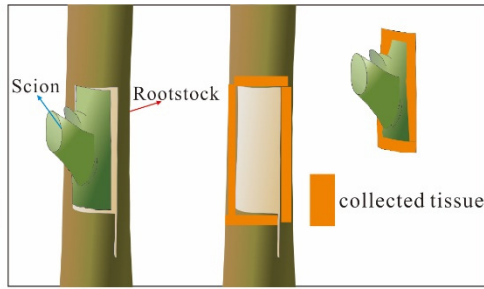

Budding and collection diagram

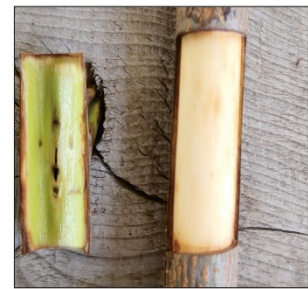

Samples at 0 days after grafting

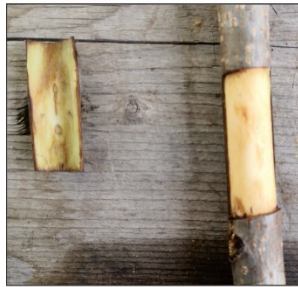

Samples at 7 days after grafting

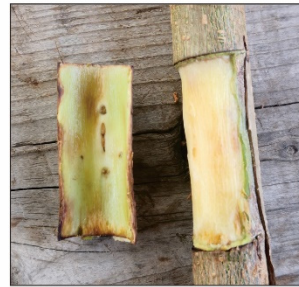

Samples at 14 days after grafting

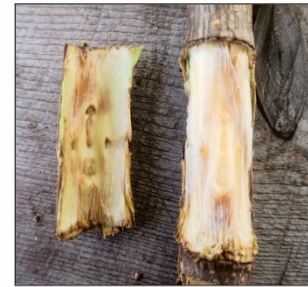

Samples at 32 days after grafting

**Figure S1.** Pecan budding and representative samples for each time point

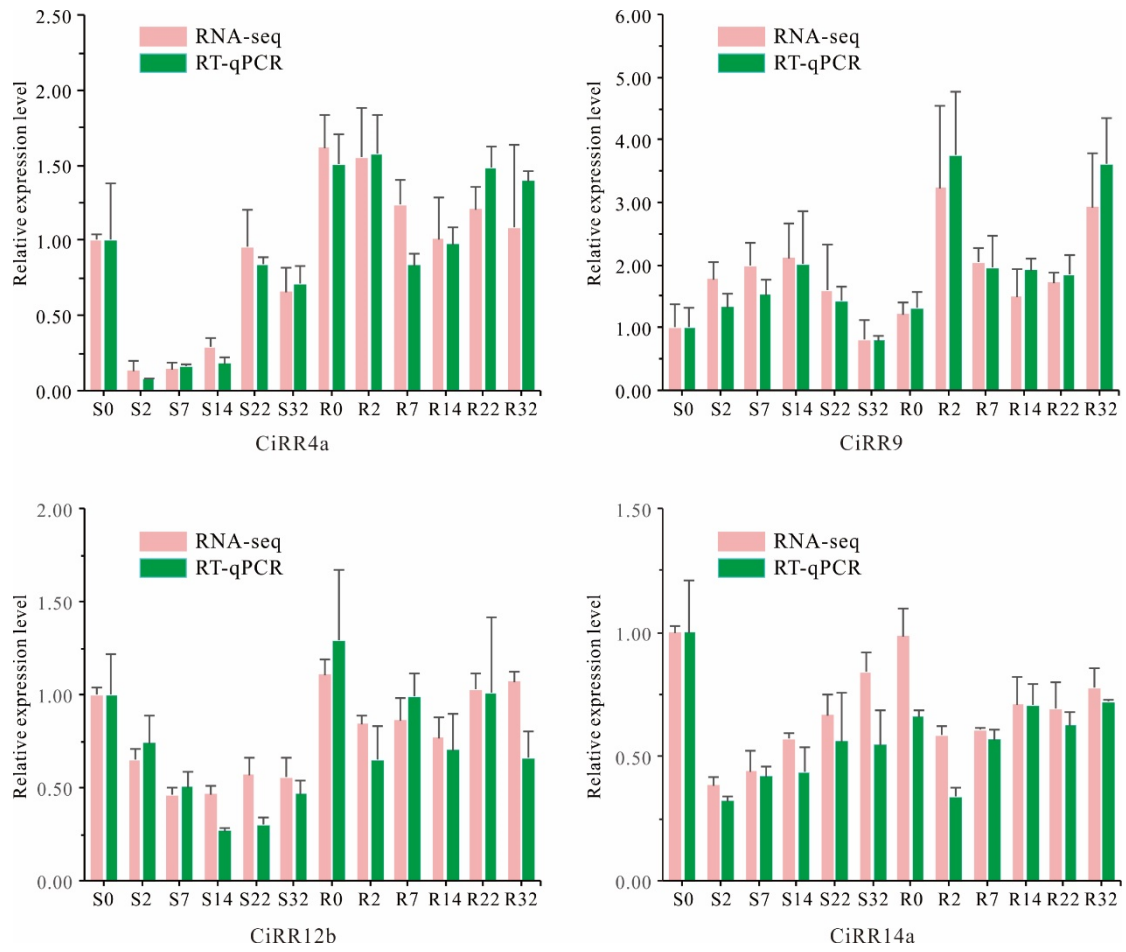

**Figure S2.** Verification of RNA-seq data using RT-qPCR. Expression levels at S0 are normalized to 1. S0~S32 or R0~R32 are the scion or rootstock tissues collected 0~32 days after grafting
