# Supplementary material
Source: MDPI journal article supplement (https://www.mdpi.com/1999-4907/15/3/473)
Supplement: s1 [file s1 › Table.xlsx]

## Sheet: Table S1
Table S1 The primers used in this study
Fragment name	Forward primer (5'-3')	Reverse primer (5'-3')	PCR product (bp)	Usage
Actin	CAACAGGGAGAAGATGAC	AGCACAATACCAGTCGTA	117	qPCR
CiRR4a	GTCGTCGTCCTCATCAG	ATCAATCCGCCAGTGTT	126	qPCR
CiRR9	AGACATTACCACCACTTCCAA	TAACAGCCAGTCCCTTCATC	152	qPCR
CiRR12b	GTCCATTCGTTCAGAGTTCAG	ACTTTCTTGTGGCTTCCTTTG	182	qPCR
CiRR14a	GCACAGTCGAGCTTGAG	CAGAGCCAGAACCAGAAC	79	qPCR
CiRR4a-ORF	AGGGAACTCTTGTCTTGTA	AGAGAGGTGTTGAACGAT	808	CiRR4a ORF clone
CiRR12b-ORF	ATAGAACATAGAGCATAT	TTAAATAACCAAGACTTT	2289	CiRR12b ORF clone
CiRR12c-ORF	GTCCCAGCATTCAAAGTT	GCTCCTCCAAGAGAAGTA	2272	CiRR12c ORF clone
CiRR4a-p2GWF7.0	GGAGAGGACTCCGGTATTATGGAGAGGAACGTTTTCG	CTTGCTCACCATTGATATTATCAATCCGCCAGTGTTT	726	CiRR4a vector construction
CiRR12b-p2GWF7.0	GGAGAGGACTCCGGTATTATGACAGTGAGCCTATAAT	CTTGCTCACCATTGATATTATTACCCGTTTCACCATTGC	2061	CiRR12b vector construction
CiRR12c-p2GWF7.0	GGAGAGGACTCCGGTATTATGACTGTGGAGGACCAA	CTTGCTCACCATTGATATAATGCACGACCCAAGAGA	2157	CiRR12c vector construction

## Sheet: Table S2
Table S2 Genes used for WGCNA
ID	S0_1	S0_2	S0_3	S2_1	S2_2	S2_3	S7_1	S7_2	S7_3	S14_1	S14_2	S14_3	S22_1	S22_2	S22_3	S32_1	S32_2	S32_3	R0_1	R0_2	R0_3	R2_1	R2_2	R2_3	R7_1	R7_2	R7_3	R14_1	R14_2	R14_3	R22_1	R22_2	R22_3	R32_1	R32_2	R32_3
CiPaw.13G094500.v1.1	1382.1	1108.79	1382.97	1492.95	1441.16	2233.96	7400.33	8098.63	5975.65	5088.72	5240.53	4456.79	5376.18	6620	5847.23	12087.2	4829.91	6782.97	1574.2	1297.29	1481.75	1304.41	1077.81	1936.77	7539.13	5669.67	5227.09	4618.83	3965.28	8203.41	3322.06	2253.21	4127.92	2385.17	4093.14	2483.6
CiPaw.01G186200.v1.1	107.99	76.42	60.26	2736.75	3550.38	3125.62	3058.52	5633.09	4089.36	5198.11	3737.86	4239.5	2844.93	4493.24	3474.81	1948.35	6022.96	5140.36	403.49	88.77	121.76	1744.75	1686.77	3152.41	8978.55	7603.73	10977.2	10113.7	5229.2	11947.3	6656.8	5023.46	5212.11	5329.75	6318.69	3736.47
CiPaw.16G014600.v1.1	4730.2	4309.5	3758.7	7317.56	7876.25	7544.14	4922.57	5461.68	4773.59	8224.89	4965.98	5516.13	2588.89	3439.56	2966.86	2035.78	4050.28	3473.45	4917.73	4276.91	4753.71	7554.56	7766.54	7008.99	5857.94	4280.12	6915.31	5959.3	4484.24	5045.58	3873.37	2260.72	3688.73	6169.46	5248.34	6975.64
CiPaw.11G195800.v1.1	60.11	74.26	40.83	1654.96	1354.34	2458.6	3406.09	4098.76	3793.3	4047.24	3834.79	4424.85	2194.52	1043.88	2766.58	841.86	2249.54	1382.62	141.7	109.45	108.24	1939.29	2223.41	2124.74	5688.57	3181.06	2676.72	2679.83	2637.53	5069.11	1351.51	980.05	2034.66	740.29	1869.83	1610.51
CiPaw.05G262000.v1.1	1285	1307.67	1283.66	3068.77	3948.87	2902.12	4828.09	4723.2	4870.43	4373.32	3895.32	4274.67	4162.92	3414.72	3746.61	3054.74	2355.79	2934.29	5021.68	5758.81	4918.52	3904.32	5254.03	5543.93	5404.29	5924.62	5168.89	4087.76	3592.19	3180.65	3089.88	2986.43	2888.99	1788.12	1422.79	1301.37
CiPaw.13G096100.v1.1	1969.65	1893.81	1876.62	1879.24	2077.02	1515.19	3725.13	2912.78	3175.52	2010.27	1838.21	1633.49	3684.86	3433.1	3630.93	3839.45	3002.91	3772.27	5573.6	6160.1	5725.93	3030.97	3862.68	4219.89	3792.67	3914.92	3317.05	2129.04	1850.93	1786.94	3312.22	2997.01	2920	1913.18	1728.73	1518.6
CiPaw.07G110400.v1.1	1670.88	1848.09	1728.09	4916.79	7340.92	5999.63	2976.67	1919.37	2030.9	2006.97	3045.73	2667.9	4651.64	3675.92	4351.14	5065.21	4020.13	4038.45	607.79	770.74	1141.09	3704.76	3399.3	2870.53	1425.08	2187.04	1725.74	2365.7	1509.45	1930.8	2363.16	3443.74	3087.09	2708.76	2089.67	2912
CiPaw.15G088500.v1.1	1251.64	1187.1	1178.87	3533.85	3301.42	2818.69	7344.31	6057.44	6658.49	5098.74	4363.68	4969.47	8009.18	6411.46	6786.14	4783.33	4786.35	5545.34	4883.87	5814.08	5412.36	5399.8	5719.39	7076.2	5712.5	5941.1	5165.37	5513.37	4550.44	3749.47	5942.08	5378.8	5281.55	2735.75	3123.99	2794.48
CiPaw.12G118000.v1.1	6175.04	5072.99	6612.83	151.9	209.65	187.01	588.64	591.57	635.91	735.73	1098.07	1129.73	3133.78	5439.28	3421.24	6124.77	4821.71	7302.62	1137.85	993.04	994.34	1817.17	1260.05	895.45	1738.21	1803.55	1427.65	3608.03	4282.01	5457.54	350.1	892.64	2364.82	266.07	948.91	509.43
CiPaw.14G068500.v1.1	1790.33	2368.07	2403.63	91.33	190.4	88.51	380.94	443.32	535.43	274.38	340.12	519.51	2304.45	2796.28	1530.47	1883.54	591.26	2032.43	1901.98	1805.66	1898.85	996.42	492.05	397.98	1284.31	2297.09	1622.63	3089.49	5896.65	3203.04	177	524.88	1628.6	93.49	195.56	535.64
CiPaw.01G116300.v1.1	601.53	533.35	693.22	6962.68	3243.75	11058.3	5171.9	5998.33	3693.05	4616.99	3981	3221.14	1972.27	1569.16	1849.78	1647.19	2210.17	2150.05	597.99	615.23	702.89	513.71	330.84	439.01	1414.24	1222.81	1435.93	1916.18	1387.48	1911.19	1145.17	1122.96	1173.12	1229.81	1222.08	1564.05
CiPaw.13G044200.v1.1	3814.21	3383.15	3732.58	1867.12	2332.37	2327.04	3193.39	3852.45	3628.03	4257	4289.16	4312.54	3849.69	3507.76	3603	4681.12	2935.32	3651.82	4650.12	4388.41	4605.04	3076.96	3355.44	3145.87	3798.23	3904.68	4362.14	4264.28	4195.26	4375.95	2613.2	2268.09	2759.54	1894.89	2051	2644.86
CiPaw.14G069600.v1.1	433.05	473.82	471.04	175.29	323.15	262.5	851.86	412.64	669.48	1086.9	740.52	1178.66	1217.95	1473.48	1141.98	977.28	805.76	1117.81	2099.68	2060.35	1841.14	1914.6	1799.29	2725.08	1488.4	2005.39	2174.7	3041.02	2595.97	2145.54	2287.56	1335.67	2336.43	1398.33	1110.27	1397.51
CiPaw.05G116500.v1.1	8017.7	7964.5	9946.89	122.25	184.72	93.72	35.09	23.28	77.73	69.44	169.3	201.66	864.64	1214.77	486.31	2318.68	1336.84	2335.84	8988.04	9253.42	8815.28	1088.22	927.13	636.68	583.61	923.56	896.79	577.14	1437.97	445.04	1269.91	440.22	1649.79	438.03	648.75	850.25
CiPaw.04G072100.v1.1	492.41	451.29	381.07	413.31	536.67	284.11	683.24	547.15	744.51	807.06	993.37	968.57	698.69	1189.1	919.97	437.15	1059.74	755.13	1577.82	1667.79	1770.36	1638.39	1658.1	1432.29	1762.97	2162.87	1839.2	2283.02	2267.86	2106.74	1797.14	1024.19	1766.76	1790.61	1839.99	2420.94
CiPaw.03G233700.v1.1	507.64	403.51	437.92	2416.4	2632.43	2533.38	5509.92	3516.08	4040.69	1640.18	1982.9	1758.34	435.89	532.91	480.91	815.71	424.88	580.16	1811.65	1832.53	1484.74	1527.73	1502.77	1575.75	1326.38	1464.15	1224.37	713.37	744.25	668.94	340.27	213.56	403.73	211.13	216.88	193.81
CiPaw.09G192500.v1.1	1850.28	1179.89	1073.28	504.62	506.37	522.24	843.37	1153.44	1062.47	588.98	621.18	643.61	1171.64	2234.06	1633.92	2190	2415.76	2438.09	1253.08	1125.96	1191.8	999.23	751.23	946.25	2712.18	1807.3	1818.29	1546.95	2180.45	2226.28	2438.27	2052.95	2563.46	1620.44	2610.93	1700.01
CiPaw.05G116200.v1.1	695	696.67	656.89	4750.38	3523.05	3743.23	3372.31	2407.7	3023.87	1767.18	2026.52	2110.45	1409.68	1342.54	1107.73	695.15	990.62	1084.44	867.5	883.9	886.84	2130.91	2087.97	1967.62	1703.03	1605.24	1871.17	1508.46	1376.69	1713.15	1174.82	1907.27	1144.58	915.21	1077.74	859.3
CiPaw.07G138000.v1.1	1101.1	908.77	1080.4	1149.81	1275.64	1258.67	2149.21	2464.04	2416.88	2140.75	2252.77	2276.77	1477.15	2442.96	1855.57	2681.87	1937.28	2128.03	1510.27	1402.21	1507.46	2004.82	1936.02	1605.4	3917.42	3793.51	4008.62	3573.61	3165.38	4467.9	2198.5	1354.89	2050.1	1751.98	2357.4	2526.86
CiPaw.07G022600.v1.1	2908.28	2497.49	2825.53	336.26	555.48	535.62	2371.28	2293.35	2528.06	1809.38	2427.67	1981.21	2739.07	2801.83	3064.27	4067.81	2064.63	2424.36	2518.38	2318.42	2460.75	1084.64	1175.02	1077.18	1951.64	2219.92	2025.71	2040.56	2501.5	2817.15	1369.94	811.5	1689.07	810.94	1049.99	1496.55
CiPaw.10G143900.v1.1	1275.86	1271.63	1299.29	1795.16	1931.05	1858.35	2686	3356.52	3023.92	2628.9	2609.29	2588.45	2291.65	1802.61	2094.02	1883.6	1420.79	1479.42	1815.8	1801.17	1804.76	1626.01	2401.79	2160.97	2392.18	2037.22	2425.94	1383.57	1228.94	1436.45	1107.45	1260.42	1026.68	1092.33	996.73	1130.55
CiPaw.15G087900.v1.1	670.16	639.72	604.15	1111.05	973.67	802.92	3676.24	1904.49	2650.44	1323.73	1076.39	1487.78	2897.94	2094.01	2282.38	1570.4	1742.06	2383.18	1985.02	2532.12	2053	1362.64	1445.79	2056.99	1710.2	1900.9	1463.59	1679.58	1479.66	1047.51	2082.22	2220.5	1846.26	592.75	673.94	649.75
CiPaw.04G007700.v1.1	187.08	154.43	152.28	428.32	531.1	421.02	1288.22	671.45	1063.71	2134.78	1375.61	2130.59	3326.9	1146.65	2313.57	475.59	1119.95	1346.35	752.42	825.23	884.72	1340.17	1312.69	2020.47	762.3	760.39	807.51	3473.23	2238.12	1513.42	1710.43	1107.8	1960.8	392.38	391.19	746.51
CiPaw.13G085800.v1.1	988.41	851.33	921.25	2051.78	1431.74	1387.17	5114.68	2743.9	3887.63	2200.27	1941.59	2516.96	2602.06	2720.13	2351.91	2388.27	2238.71	2851.08	2942.18	3608.48	3087.12	1747.42	1778.62	2420.79	2204.17	3065.37	1911.69	2659.7	1894.35	1519.4	2497.82	2557.06	1807.17	624.44	630.42	599.9
CiPaw.05G182300.v1.1	366.51	302.96	340.36	1412.17	1470.06	1961.98	1879.86	2102.72	2041.93	3165.51	2974.66	3079.31	1790.9	1375.99	1661.04	1125.56	825.77	968.54	632.3	639.27	687.46	1481.12	1501.18	1368.95	1472.1	1575.75	1914.71	1882.78	1427.01	1802.93	1038.49	599.63	1187.39	505.5	567.12	678
CiPaw.01G281600.v1.1	2908.54	2821.32	2851.96	271.42	412.86	307.94	479.1	522.23	613.26	414.08	349.58	392.84	910.04	1104.74	913.92	1570.63	1585.2	1586.05	3488.8	3276.52	3255.73	870.96	878.09	985.68	1058.91	1101.49	1170.75	950.28	1301.47	867.26	1268.09	906.53	1450.15	1280.77	1272.44	1593.04
CiPaw.13G086100.v1.1	597.14	549.59	628.49	442.44	414.24	351.51	1745.22	1040.71	1486.99	1088.81	1082.24	1266.2	2314.1	1578.73	1922.91	1498.71	1683.28	2060.44	1926.84	2180.28	2141.28	1605.74	1380.92	1735.27	937.75	982.35	877.51	1812	1540.15	1123.47	1939.22	1639.85	1873.76	696.55	718.14	780.39
CiPaw.03G276400.v1.1	1235.49	1369.97	1103.74	295.95	442.98	126.69	722.76	541.56	902.68	1398.22	1533.45	1263.92	1697.87	2728.7	2085.37	3357.83	3088.69	3407.52	1117.87	949.69	788.4	1725.56	1471.47	1186.86	1308.47	1241.16	1289.76	1247.64	1613.04	1503.75	2785.51	5175.78	2874.01	5331.28	4371.16	2534.4
CiPaw.03G022100.v1.1	1907.89	2049.89	2124.1	78.73	75.02	117.91	216.08	201.11	208.23	96.41	89.38	80.43	881.92	2243.12	623.72	1080.84	726.47	948.96	2610.44	3824.31	3672.28	796.27	684.47	662.54	547.04	988.49	906.95	242.56	641.21	934.36	861.72	212.65	419.67	281.45	179.77	86.04
CiPaw.03G165100.v1.1	1582.28	2016.07	1605.03	107.39	170.49	102.77	426.43	345.18	386.6	497.96	458.07	577.63	704.1	1010.39	871.19	1441.23	1254.86	1533.7	2964.7	3322.19	2685.17	1441.67	1016.09	1185.27	1150.83	848.52	784.24	943.54	1071.53	1042.78	841	737.66	991.19	1302.42	991.73	1586.19
CiPaw.13G095600.v1.1	211.77	234.36	206.7	887.95	1397.1	889.55	1200.37	768.12	1006.86	2752.37	1982.17	2551.48	2062.53	1051.86	1865.85	319.44	786.81	894.69	1130.66	1519.83	1156	1508.63	1553.06	2174.97	1254.43	1289.17	1074.99	4150.29	1722.7	2229.23	2042.25	1705.2	2275.15	1491.86	869.74	1339.55
CiPaw.02G190600.v1.1	729.76	575.6	613.95	932.07	1256.38	852.97	961	858.26	1001.72	1024.86	1035.16	1216.42	3137.36	3236.54	3606.08	3349.13	3786.14	4070.71	1255.95	1123.67	1148.42	446.36	396.28	421.3	813.69	715.92	776.43	1146.8	1540	1325.73	2472.48	2223.08	2930.72	2361.04	2459.39	2177.36
CiPaw.07G140900.v1.1	1168.95	1453.71	1600.7	351.61	463.35	422.8	400.9	557.63	422.01	457.92	450.54	606.89	2147.7	2059.19	2332.63	1765.69	2158.17	1809.36	827.53	938.69	865.98	470.57	564.51	398.87	667.34	715.51	856.73	905.76	694.51	698.47	2213.08	1932.54	2200.5	2129.57	1235.06	1802.66
CiPaw.10G129900.v1.1	23.89	8.15	12.24	1945.81	1392.68	1630.25	2065.1	2177.54	2365.15	1596.36	1359.2	1639.22	568.45	209.42	377.62	146.5	208.09	180.5	7.59	3.26	4.86	568.63	688.31	659.27	748.02	743.72	1000.9	1023.12	781.5	1165.2	459.6	445.76	540.87	641.08	495.96	320.5
CiPaw.04G183700.v1.1	2.22	3.67	3.04	2986.61	1305.68	3498.35	3355.85	4262.41	2660.83	1968.79	1216.68	1134.53	685.1	332.42	817.73	318.51	220.36	676.08	1.49	1.95	5.17	384.14	347.81	483.09	1957.46	956.44	910.86	414.28	206.88	791.53	353.16	94.43	719.49	220.22	584.76	113.87
CiPaw.12G109200.v1.1	397.77	363.19	380.12	1296.83	1028.85	864.77	3479.02	2056.76	2776.18	1239.14	1253.74	1497.15	1333.48	827.69	913.94	701.46	498.91	613.86	1292.73	1659.82	1327.92	1480.83	1600.25	1996.86	1602.74	1988.61	1491.03	1247.38	1220.92	725.54	734.02	843.02	731.67	264.5	273.86	254.64
CiPaw.15G021900.v1.1	245.39	246.18	227.89	990.87	890.04	847.89	1459.1	1526.51	1674.47	1062.95	1165.05	1356.76	993.78	799.67	679.31	423.2	528.35	523.9	646.52	699.3	754.22	1854.9	1514.41	1214.81	1810.55	1882	2042.53	1962.92	2017.3	2164.18	901.96	831.97	1279.33	489.34	730.05	909.04
CiPaw.06G139100.v1.1	392.31	397.21	481.63	2495.58	2041.42	2264.64	4909.29	3409.09	5265.71	2590.6	3545.65	3891.82	553.48	337.69	412.71	389.04	542.55	461.54	167.68	148.2	247.61	935.48	1054.56	893.56	1058.54	1140.01	1253.32	772.29	1151.24	761.71	297.49	365.64	382.17	171.99	108.68	317.94
CiPaw.01G107800.v1.1	1317.18	1283.12	1202.71	118.51	149.14	74.27	347.16	251.23	379.52	487.51	631.52	757.11	667.45	1414.79	914.26	616.71	922.58	775.74	1801.85	1683.69	1641.76	1545.14	1564.22	1151.64	1491.33	1390.28	1251.48	1716.72	2313.04	2103.27	1403.01	792.46	1461.84	879.69	960.94	1154.56
CiPaw.13G113200.v1.1	728.16	626.73	635.71	218.8	386.34	286.59	1299.27	1634.1	1637.66	1549.99	1764.12	1716.92	952.01	1208.32	1045.64	1344.01	1131.82	1355.05	709.6	684.17	598.27	497.76	449.59	493.59	1404.53	1121.26	1546.48	1505.16	1676.28	1576.6	1227.57	1127	1371.04	1487.58	1105.99	1213.11
CiPaw.04G178400.v1.1	827.82	946.38	986.7	22.99	79.82	61.51	16.28	13.64	22.51	13.52	24.47	27.01	222.58	358.06	173.01	377.27	295.02	197.89	1820.57	1557.39	1631.53	1194.11	981.41	1076.32	524.35	1172.58	1634.89	1098.03	1980.01	741.16	452.64	109.03	442.68	350.56	200.48	618.32
CiPaw.07G057100.v1.1	2273.14	1915.41	2289.48	1027.09	922.78	905.61	1506.26	1746.59	1960.23	2162.67	1945.73	1953.43	1303.61	1594.12	1422.31	2032.76	1611.45	1837.32	1888.81	1536.28	1470.22	1317.54	1489.93	1441.75	1208.92	1501.62	1473.8	1876.59	1621.34	1558.11	1048.51	619.62	932.21	901.01	1120.01	895.45
CiPaw.09G087300.v1.1	2717.96	2579.16	2349.96	1841.13	2067.45	2113.96	1993.65	1741.08	1819.08	1645.19	1725.59	1557.88	1378.67	2141.05	1597.11	2845.07	2749.42	2900.61	2496.83	2624.54	2688.68	1942.62	1818.52	2008.6	1597.14	1564.2	1575.24	1649.51	1494.53	1988.24	1933.82	2184.11	1907.89	3135.39	3002.49	2393.71
CiPaw.08G071500.v1.1	1585.71	1588.47	1841.78	472.8	556.88	354.01	115.25	190.4	129.25	268.98	226.6	263.62	1907.3	1870.77	2568.22	2256.67	2657.29	2812.92	746.85	696.39	756.87	335.31	255.93	251.12	274.07	266.35	295.9	379.87	319.13	261.78	1637.67	1474.03	1781.64	1231.24	975.08	954.55
CiPaw.10G022600.v1.1	849.61	825.26	924.4	13.06	21.08	29.47	23.94	54.51	29.16	101.11	125.85	98.76	430.72	680.97	545.99	965.17	836.73	646.53	944.2	1381.7	1720.63	246.36	300.54	194.12	192.2	247.77	336.71	445.85	400.89	288.22	790.35	922.08	964.61	773.44	886.23	1228.84
CiPaw.15G130700.v1.1	487.27	425.22	499.79	2186.46	2297.74	2692.48	2653.69	2814.35	2521.16	1843.43	2122.37	2002.91	909.9	519.79	920.45	560.31	388.65	404.63	547.11	471.37	429.57	1201.88	1331.25	1227.88	1216.37	1067.3	1425.4	670.92	775.4	757.95	387.67	478.39	408.87	327.32	410.36	486.1
CiPaw.15G088300.v1.1	564.83	546.69	511.96	437.35	373.1	306.24	1407.76	771.77	1075.55	586.39	406.97	623.4	1347.31	1152.39	1020.06	916.36	853.45	1137.29	1417.37	1741.2	1396.39	996.27	809.18	1073.39	1000.41	1237.04	832.25	1582.99	1365.02	1028.95	1267.2	1274.33	1321.17	509.83	581.21	465.49
CiPaw.03G022600.v1.1	5289.84	5467.34	6428.39	19.11	18.85	35.1	120.91	191.76	231.76	240.23	162.72	210.84	648.54	1588.5	411.97	1488.03	1424.81	1908.05	4729.11	6594.16	5920.49	558.71	34.59	192.58	520.64	312.02	246.16	383.22	940.72	771.75	1093.04	381.51	876.25	577.9	547.65	514.95
CiPaw.11G195900.v1.1	19.73	11.96	10.91	916.91	703.97	1487.95	1272.51	1273.02	1229.7	1667.15	1682.68	1566.61	712.34	562.42	1005.66	263.73	602.7	383.34	35.99	26.84	29.82	428.88	615.77	563.96	1342.48	947.32	830.73	766.8	689.89	1263.44	384.04	245.16	478.8	165.11	459.03	358.95
CiPaw.13G085300.v1.1	292.32	254.14	290.38	868.44	719.59	658.32	2830.72	1333.77	1820.46	793.19	672.2	913.66	1452.49	1746.39	1378.05	1023.32	883.14	1044.52	1462.87	1331.92	1015.29	1029.52	1270.65	1910.83	1400.66	2177.47	1562.04	1371.19	1096.43	726.91	1357.13	1486.77	1267.81	259.52	424.9	290.6
CiPaw.05G032300.v1.1	1045.27	1362.37	1266.21	96.68	98.26	86.75	146.01	276.79	150.16	386.35	345.81	453.37	1273.27	743.97	1062.98	483.92	550.02	574.75	123.62	126.39	137.86	110.85	122.97	72.28	467.44	616.43	674.75	734.58	439.96	318.06	848.09	907.3	852	870.63	522.33	925.45
CiPaw.09G009100.v1.1	237.35	258.48	234.38	1210.48	920.26	929.86	1533.45	1300.67	1637.32	966.28	1200.62	1255.15	560.72	549.71	450.7	265.42	410.57	334.2	308.89	318.39	314.04	1023.42	975.41	831.73	1025.48	989.41	1130.41	981.9	1112.06	1232.85	634.39	693.07	696.76	431.64	472.13	485.6
CiPaw.14G069400.v1.1	287.31	301.72	288.02	233.42	431.72	243.83	992.21	426.67	550.95	466.61	237.26	417.8	761.29	988.97	804.89	413.32	271.31	332.94	1110.54	1339.94	1257.1	894.06	945.45	1569.89	836.03	825.29	855.95	1235.5	790.97	724.71	1500.55	959.76	1431.02	801.01	570.23	713.24
CiPaw.10G051200.v1.1	1136.36	950.8	1151.04	1582.58	1269.77	1572.93	2927.52	3001.9	2693.21	2257.87	2499.2	2703.51	1496.97	1862.83	1569.58	1990.86	1096.4	1209.99	697.25	664.81	635.78	1553.32	1297.26	1072.72	1329.65	1329.73	1567.71	1496.53	1676.56	1907.63	966.08	999.87	1005.48	487.7	607.73	616.33
CiPaw.11G118600.v1.1	1349.75	1381.55	1558.25	261.18	310.69	288.93	281.14	366.26	285.05	501.03	538.69	540.33	1338.29	1164.65	1402.03	1068.49	1018.99	1030.41	559.24	552.46	694.9	424.85	387.73	354.05	482.87	575.89	661.94	708.29	601.42	556.21	1196.7	1382.11	1146.1	1084.72	926.21	981.48
CiPaw.13G140300.v1.1	1972.55	1688.29	1861.5	43.73	67.72	49.56	322.51	320.41	319.67	197.65	157.71	137.61	574.32	965.69	534.04	610.33	659.56	506.83	2620.51	2425.22	2334.4	443.05	432.92	341.84	1120.18	1385.4	1243.43	911.7	1453.12	1003.84	701.48	362.77	632.39	546.09	623.68	805.21
CiPaw.06G165200.v1.1	848.4	858.31	896.45	349.55	335.04	384.45	371.64	426.44	312.51	524.39	484.44	472.45	1326.29	1292.14	1231.12	1200.17	1240.74	965.97	594.39	948.48	970.39	499.22	477.91	484.14	627.3	670.42	751.09	940.32	755.61	698.59	1474.7	1631.3	1545.85	1443.12	1105.53	1460.71
CiPaw.04G159500.v1.1	116.48	99.89	101.72	330.29	253.38	167.85	1420.86	601.44	1072.52	383.01	250.99	464.02	1019.91	884.92	832.33	383.86	935.8	1013.47	738.36	820.76	751.34	603.05	670.97	1062.34	1047.95	1099.21	758.94	766.5	614.84	483.4	1222.28	1116.83	1000.66	250.19	411.84	278.53
CiPaw.10G145400.v1.1	208.78	232.5	308.98	207.56	269.24	373.43	595.64	713.47	609.97	1324.08	1393.9	1392.03	1228.27	704.99	1348.2	749.05	685.39	1030.31	154.44	126.04	107.26	449.77	231.73	331.11	630.71	878.93	866.13	1350	1074.83	1331.91	331.94	337.46	371.59	222.34	283.26	504.31
CiPaw.11G116000.v1.1	583.87	632.35	595.95	820.91	832.68	683.87	919.39	654.71	771.59	653.56	629.67	539.68	1491.85	1438.6	1218.78	776.16	1478.57	1374.9	1929.12	1891.67	1949.76	1081.52	1249.65	1384.86	1272.89	1363.32	994.89	905.29	857.06	642.9	1558.25	1321.27	1214.53	1639.18	1279.87	1059.78
CiPaw.07G105400.v1.1	844.82	791.84	820.67	1129.25	1211.18	1400.92	1474.42	1653.82	1501.49	1811.25	1480.82	1634.07	1471.98	1774.46	1616.57	1304.89	1328.52	1407.81	1159.14	1135.58	1171.39	2647.48	2534.79	2584.82	2581	2147.52	2444.89	2689.78	2432.96	2954.41	1659.13	1478.54	1851.81	1210.85	1701.65	1531.79
CiPaw.03G011300.v1.1	186.38	202.88	188.09	697.04	1205.82	1042.46	1485.68	1048.89	1188.03	1950.17	1193.87	1875.39	2401.08	1439.98	2060.52	406.52	1042.04	991.23	796.7	891.55	730.6	1067.13	1297.32	2107.21	1484.95	1343	1208.34	2560.71	1695.27	1208.2	2138.55	1493.82	1720.3	862.44	982.49	1117.44
CiPaw.01G130600.v1.1	427.28	461.8	355.7	490.6	463.88	499.49	166.66	153.81	155.71	301.37	178.65	275.26	1024.36	1495.65	1110.27	1103.22	1867.66	1306.34	433.56	540.82	669.84	843.62	770.56	868.62	349.76	317.74	301.06	331.56	251.38	282.02	1400.79	2146.56	1368.87	1753.48	1122.56	1785.11
CiPaw.11G143400.v1.1	300.97	341.2	274	101.13	167.45	26.49	125.8	77.07	135.32	85.17	210.08	130.37	169.31	617.21	339.93	120.78	573.17	410.97	385.22	386.29	414.1	1363.41	1066.53	1180.83	958.37	873.13	749.57	859.59	885.58	837.31	709.4	660.47	643.02	1056.46	1171.37	923.71
CiPaw.05G032400.v1.1	930.47	1272.62	1142.1	154.61	150.34	131.39	167.8	279.69	153.05	362.95	333.1	421.92	1302.05	837.25	1215.95	465.07	606.84	618.43	265.84	255.1	240.76	113.9	97.94	82.7	396.47	500.92	486.63	505.41	361.44	279.4	827.31	946.62	797.32	896.1	675	1028.42
CiPaw.15G021800.v1.1	24.69	28.49	22	1200.13	791.78	782.74	1844.78	1135.27	1720.35	720.65	1007.48	1093.62	508.55	328.15	230.95	57.06	177.05	174.45	45.73	54.35	56.14	518.32	360.49	359.6	680.74	575.04	703.54	615.44	617.66	636.16	309.82	506.59	362.62	98.31	156.76	79.82
CiPaw.09G102900.v1.1	2125.1	2724.78	2216.84	1415.08	1770.02	1229.59	1802.54	1165.94	1487.02	890.7	848.68	933.32	1234.46	1574.94	1431.17	825.63	886.73	960	2704.27	2282.78	2025.81	1175.33	902.17	915.83	1071.09	1884.98	1233.78	1016.96	1511.87	942.47	870.03	833.51	1073.45	1017.01	947.69	697.38
CiPaw.08G156300.v1.1	711.55	856.33	738.54	1677.21	1735.88	1559.43	889.27	924.87	830.03	753.08	718.07	574.57	1186.66	1085.24	1070.38	463.51	1216.8	1065.98	1716.05	1465.71	1409.46	1395.49	1605.55	1688.86	1326.04	1306.65	1112.83	861.08	843.48	578.35	1367.48	1002.76	1181.02	1548.56	1366.42	1150.58
CiPaw.15G087800.v1.1	230.32	211.4	200.51	344.56	272	248.75	1143.86	582.96	862.67	233.11	155.76	304.78	1364.64	906.5	993.35	833.23	1010.79	1225.99	806.07	986.27	823.69	490.65	472.29	687.28	509.3	615.13	414.93	347.35	373.44	228.39	806.54	687.5	763.56	220.65	297.42	292.03
CiPaw.02G192900.v1.1	1417.95	1484.01	1582.36	47.44	66.53	56.76	40.55	150.73	65	359.84	443.29	419.92	1013.17	575.71	1003.81	806.45	504.66	594.68	192.03	197.84	209.92	205.9	188.94	118.91	369.96	440.97	502.71	579.39	494.16	322.47	617.72	788.17	794.56	524.88	531.94	674.18
CiPaw.15G088000.v1.1	143.6	149.06	134.28	466.36	401.44	295.17	1785.99	778.99	1255.08	615.08	438.73	719.4	1646.44	905.11	1087.77	432.7	804.49	932.87	806.67	987.46	848.44	627.18	585.23	894.21	819	867.22	676.11	955.01	906.11	555.49	1135.41	1153.89	1099.4	271.03	370.6	345.19
CiPaw.06G021400.v1.1	857.68	916.88	735.64	286.2	300.71	216.32	285.18	259.76	265.56	344.17	292.09	436.77	800.83	872.33	815.18	695.35	1129.2	848.01	866.87	925.5	895.12	320.27	341.1	403.26	484.95	488.68	456.91	462.6	462.11	340.11	948.5	803.06	1117.75	954.43	623.23	1219
CiPaw.01G191000.v1.1	508.83	561.46	528.58	48.27	57.43	47.07	143.64	194.17	188.52	261.41	181.8	288.14	258	429.96	316.56	606.96	853.97	754.93	1081.67	922.24	940.07	196.03	126.77	150.48	764.1	621.53	507.47	779	794.64	692.71	563.84	484.55	571.19	915.71	735.13	1003.67
CiPaw.09G062300.v1.1	1632.01	1414.97	1543.95	427.05	602.69	525.98	1215.46	1564.05	1491.36	1312.84	1338.83	1443.14	1166.57	1518.12	1262.41	2431.04	1313.24	1633.79	1192.45	1279.58	1308.22	1117.62	994.35	873.35	1418.8	1348.14	1622.1	1049.55	1230.15	1632.23	821.74	742.99	889.72	703.4	704.89	922.89
CiPaw.07G105200.v1.1	1448.45	1428.39	1497.8	343.05	384.18	220.52	692.23	670.52	738.19	955.35	907.51	925.74	728.34	1230.85	904.53	949.62	1420.13	1315.73	1035.98	1025.88	1039.83	913.48	934.69	873.23	1400.91	1393.82	1458.92	1258.09	1317.32	1462.27	974.86	1043.49	873.53	1042.76	1286.59	978.15
CiPaw.10G152000.v1.1	101.49	86.86	86.45	893.5	904.5	1179.29	731.72	889.34	765.42	999.08	786.26	760.23	1596.99	1333.95	1414.86	1350.14	1073.19	1058.76	72.01	45.61	60.41	126.25	105.33	156.6	253.12	327.88	278.88	153.53	130.34	175.64	354.73	535.95	349.26	208.99	251.45	175.44
CiPaw.04G141300.v1.1	565.06	702.73	668.5	67.2	91.65	76.44	60.4	106.9	71.33	161.99	128.03	142.83	502.12	567.62	544.73	877.03	712.41	657.38	513.46	559.83	732.51	299.52	172.3	126.53	180.54	238.94	219.9	402.11	190.47	202.6	578.42	956.18	634.09	636.08	589.73	853.83
CiPaw.10G023200.v1.1	580.47	684	683.97	1381.34	1473.52	1292.02	1306.55	1214.7	1232.06	1172.56	1162.7	1158.34	972.69	858.34	927.52	614.43	800.38	734.76	385.25	448.51	489.56	713.96	838.2	698.8	430.46	628.87	483.5	178.1	173.33	238.32	429.58	518.42	298.67	501.42	398.07	241.56
CiPaw.05G077600.v1.1	1842.81	1892.54	1691.74	1089.21	1014.96	1153.84	1156.91	1160.94	1146.13	757.44	742.28	806.76	936.36	1501.83	1214.98	1186.25	1530.21	1427.46	2199.03	2244.4	2141.42	1241.47	1198.33	1236.83	1813.11	1641.33	1614.49	1345.08	1557.42	1545.02	1507.7	1374.55	1433.54	1479.53	1793.06	1452.06
CiPaw.07G197800.v1.1	742.67	991.57	1030.38	34.34	24.7	25.12	10.69	26.1	6.22	35.79	25.2	42.28	375.89	439.5	350.53	945.24	557.29	591.79	454.5	560.05	832.7	46.2	39.56	38.07	76.85	127.27	155.37	204.47	115.59	63.4	508.67	873.17	607.79	628.19	453.17	807.6
CiPaw.08G067100.v1.1	460.88	467.04	449.31	828.05	842.46	736.96	650.62	618.66	600.68	548.79	570.51	467.96	1131.51	1147.96	930.44	562.74	1074.68	1014.26	2059.67	2034.23	1956.98	1059.87	1190.01	1272.16	1065	1047.05	794.25	722.73	771.69	541.07	1240.29	973.41	977.23	1019.19	952.52	767.38
CiPaw.11G093600.v1.1	1324.69	1446.24	1533.12	74.31	87.69	72.96	51.14	163.04	86.1	346.94	351.34	367.85	762.56	468.79	786.66	1003	639.63	691.54	265.02	301.1	370.89	333.56	212.15	130.76	405.94	530.63	622.49	610.19	439.98	314.15	734.3	858.55	769.05	658.36	600.52	740.51
CiPaw.02G188600.v1.1	422.6	422.44	370.29	684.98	670.07	537.02	1242.06	1044.92	1137.31	672.77	599.19	736.88	1186.29	1240.05	1123.35	950.69	1231	1266.79	1197.68	1375.7	1131.53	733.55	923.18	1058.09	1084.32	979.09	637.22	883.49	768.31	626.27	1126.14	897.81	926.05	609.38	528.78	550.12
CiPaw.08G084500.v1.1	439.91	457.34	406.09	237.01	319.93	294.98	114.14	118.28	122.33	202.47	117.42	112.64	332.43	582.86	516.43	1307.77	1329.12	917.97	486.77	491.55	578.94	825.61	619.89	801.18	267.57	210.9	208.4	323.16	244.59	284.26	980.75	1746.51	798.6	1924.8	1091.48	1463.5
CiPaw.01G186100.v1.1	14.45	9.78	6.53	943.91	1129.12	1090.81	561.48	626.94	621.24	708.74	668.73	802.41	429.33	556.24	518.73	141.03	537.52	568.53	4.68	2.23	2.3	307.09	481.59	572.15	527.46	1291.18	807.58	421.06	232.59	951.88	222.22	378.43	377.17	172.51	431.09	69.13
CiPaw.04G151400.v1.1	13.33	12.66	11.88	487.86	358.48	383.39	975.04	555.15	674.25	709.87	838.93	903.47	214.17	336.72	197.39	38.86	131.95	138.44	57.73	45.16	32.44	310.15	338.43	364.17	492.96	593.82	620.04	1159.05	1116.79	898.41	323.59	515.17	298.43	146.66	93.11	109.63
CiPaw.14G043500.v1.1	533.29	536.6	363.8	140.99	165.04	92.47	725.6	466.64	811.35	662.47	918.21	1025.41	808.56	1000.79	923.37	440.06	943	831.07	375.37	454.58	374.94	651.51	502.6	463.76	1168.04	1099.78	963.09	1578.82	1468.67	1477.15	908.73	709.71	870.35	673.34	818.63	601.22
CiPaw.01G114000.v1.1	1082.05	1028.86	962.29	78.77	103.6	49.05	458.44	366.79	408.85	747.44	780.64	939.73	663	1190.4	910.35	1013.07	1108.12	1228.33	1226.66	1237.22	1089.88	590.65	550.06	554.03	925.07	996.91	862.48	759.87	842.7	910.87	609.43	498.22	667.1	480.17	422.18	666.64
CiPaw.03G023300.v1.1	1718.76	1500.95	1722.41	1.28	0.65	3.14	9.02	11.45	13.54	11.45	20.52	20.21	260.81	694.63	207.57	424.65	332.49	347.7	2480.3	3603.88	2664.17	201.83	118.57	153.84	212.8	326.72	246.85	267.34	814.69	624.38	382.27	193.13	546.56	228.65	225.64	296.85
CiPaw.12G075900.v1.1	795.51	674.62	829.56	65.57	84.73	32.07	100.4	134.15	167.28	270.66	361.5	271.59	272.97	454.87	327.3	558.74	345.79	441.49	846.79	810.7	823.59	489.17	449.69	425.73	706.03	982.91	806.97	884.79	1048.67	1027.09	506.83	210.6	564.08	288.56	323.02	553.4
CiPaw.02G078000.v1.1	2.63	4.02	1.3	988.76	991.59	940.04	294.64	302.39	256.64	231.62	134.36	143.03	401.84	546.53	565.71	262.88	480.16	272.47	18.74	24.93	42.63	808.33	888.1	909.59	800.47	570.92	733.65	497.41	302.69	529.89	833.96	645.38	479.59	374.04	688.48	444.88
CiPaw.09G169300.v1.1	1345.46	1141.88	1310.78	620.34	471.12	914.95	390.71	453.15	289.65	428.06	479.28	458.02	1159.29	669.93	977.3	1165.83	1501.64	927.22	775.22	793.81	851.83	600.6	588.43	486	485.1	772.87	1038.92	900.55	947.49	736.91	1077.51	785.71	732.15	1052.87	603.05	792.81
CiPaw.14G096600.v1.1	742.55	825.64	803.37	68.62	59.14	76.76	86.15	216.26	107.75	393.57	507.82	472	885.48	530.8	905.26	703.08	590.5	489.69	54.3	61.46	80.16	163.94	142.91	78.04	331.93	409.59	428.48	406.01	308.23	253.23	583.95	932.12	615.58	465.96	386.6	498.39
CiPaw.03G023200.v1.1	1894.79	1758.58	2290.77	42.75	47.86	45.86	215.94	220.9	242.56	321.45	203.33	319.91	578.94	1112.06	364.96	757.5	957.43	1047.83	338.82	450.92	685.86	1118.2	561.38	645.52	429.24	787.49	651.47	612.14	495.1	588.59	404.1	943.85	487.74	554.59	691.34	490.98
CiPaw.11G172200.v1.1	919.95	853.98	778.21	48.95	70.57	65.98	59.15	83.59	62.17	238.56	255.28	300.95	678.61	612.62	768.22	614.11	480.75	540.27	164.93	205.56	236.14	218.2	168.16	142.31	388.15	490.88	653.93	424.82	366.83	241.09	631.7	578.83	712.73	720.72	388.37	549.53
CiPaw.06G121900.v1.1	1151.84	990.98	911.26	345.27	352.14	358.28	283.66	440.85	346.48	386.77	426.61	371.19	1011.41	994.55	1220.52	904.5	773.83	963.48	702.74	746.92	878.01	427.47	430.53	413.74	480.9	457.45	493.87	481.43	468.28	502.23	913.65	789.6	1120.76	1094.24	717.64	818.7
CiPaw.15G007900.v1.1	820.93	789.43	781.41	423.99	521.2	471.9	460.46	469.69	454.32	591.36	382.15	471.8	744.49	1071.6	1020.39	1289.72	1746.02	1357.79	994.26	854.22	955.43	245.52	242.96	319.96	727.79	603.37	582.06	553.37	441.86	497.16	1053.26	691.84	668.76	1514.1	1506.1	1421.3
CiPaw.08G047700.v1.1	674.61	826.69	674.39	22.72	33.06	14.89	94.44	144.11	107.82	202.26	152.69	213.23	870.23	569.59	785.53	446.7	383.47	539.76	35.18	37.07	40.16	55.31	48.75	45.17	341.92	345.92	380.22	476.86	388.01	288	523.84	639.52	760.23	276.02	300.42	512.22
CiPaw.07G058600.v1.1	389.68	427.7	355.77	137.64	169.78	86.42	189.71	190.12	246.28	209.67	246.64	228.26	249.72	554.39	355.73	211.67	622.61	491.02	416.7	378.39	414.87	1227.53	855.52	989.34	815.19	622.15	658.44	745.01	762.23	923.44	620.35	596.49	564.55	998.44	1141.79	689.02
CiPaw.01G229300.v1.1	0	0	1.6	1041.81	667.98	1279.67	845.24	1317.62	745.59	991.11	489.35	512.66	345.3	94.62	239.68	67.67	95.05	136.37	2.41	1.26	7.21	339.9	346.61	337.01	450.9	340	459.69	510.46	163.76	571.47	77.76	108.12	172.46	67.5	90.38	49.54
CiPaw.15G134900.v1.1	865.81	1196.4	915.05	778.91	1387.46	683.66	775.8	846.26	899.55	925.81	720.22	635.49	402.23	376.56	579.25	267.89	587.99	585.88	1223.67	1286.26	1054.26	786.55	1333.1	1451.25	1425.98	1209.59	1273.13	1051.4	726.67	722.43	410.01	356.76	378.56	933.62	806.74	799.42
CiPaw.15G080700.v1.1	152.38	136.98	167.43	540.4	496.56	545.35	739.53	836.16	976.6	607.3	618.34	671.17	126.96	127.24	99.98	154.24	85.34	114.76	175.82	171.27	175.06	545.74	485.77	480.51	569.01	455.38	552.82	495.91	595.42	527.48	48.45	30.15	70.26	92.51	59.27	119.91
CiPaw.07G176200.v1.1	1586.23	1567.14	1614.24	374.45	280.19	423.37	655.19	718.25	649.64	921.51	1158.52	1086.47	1426.01	656.13	1296.89	1208.47	908.24	839.27	101.1	136.68	187.79	587.62	367.2	190.94	589.4	756.59	986.66	814.27	577.94	445.37	749.39	865.19	777.59	957.4	605.14	871.52
CiPaw.05G005500.v1.1	204.91	217.36	199.26	628.15	713.67	732.28	1317.87	1546	1465.71	1139.59	1229.98	1096.94	1577.55	760.17	1349.84	1032.18	1022.13	794.77	257.04	260.81	233.48	493.5	511.17	515.52	1138.04	688.17	832.13	640.67	617.21	722.55	705.5	690.28	648.97	854.1	710.57	748.12
CiPaw.11G184700.v1.1	1441.26	1377.52	1447.82	1174.03	1218.76	1439.85	1958.8	2092.41	1907.16	2031.14	1864.91	1962.07	2111.57	1815.26	2027.06	1773.29	1519.7	1601.19	1642.24	1572.65	1609.35	1358.53	1535.26	1437.03	1699.97	1780.02	1807.21	1592.7	1533.21	1719.37	1340.27	1266.31	1413.19	1146.2	1197.54	1228.58
CiPaw.07G011000.v1.1	722.14	734.52	664.78	762.21	874.1	806.32	788.96	793.85	806.36	770.59	681.41	721.42	826.62	1223.87	946.23	830.84	936.11	914.95	1014.28	1067.42	1053.87	1282.36	1405.64	1445.48	1486.42	1416.66	1347.48	1177.25	1142.24	1234.82	1299.42	1176.76	1214.41	1047.26	1143.77	1050.81
CiPaw.02G147700.v1.1	928.31	995.24	696.74	320.08	306.03	234.28	420.64	321.72	371.15	397.27	572.95	414.3	520.79	690.1	594.24	647.71	1038.74	1024.73	1070.91	1151.9	980.97	393.94	445.74	395.12	646.55	498.45	483.36	707.3	703.08	630.65	817.63	713.83	825.79	1154.74	776.48	842.17
CiPaw.03G180400.v1.1	1009.28	1003.56	984.54	663.74	555.62	656.81	349.05	538.09	395.85	776.43	945.09	888	1376.84	823.77	1543.39	840.04	571.58	630.02	76.41	105.99	141.03	345.91	401.5	266.36	491.06	562.46	650.75	532.8	412.57	344.7	736.43	829.91	859.01	598.26	483.63	551.25
CiPaw.09G103500.v1.1	455.98	552.54	537.46	337.18	285.92	378.93	573.32	561.87	496.36	681.73	614.8	814.28	1716.07	1141.33	1415.5	874.14	1464.21	826.12	132.61	183.12	210.71	235.56	284.21	231.79	506.46	539.29	632.2	616.16	414.39	448.9	808.61	910.27	762.88	560.93	550.08	963.13
CiPaw.07G028600.v1.1	27.96	25.28	21.95	832.5	599.83	703.42	1924.6	1396.9	2177.13	926.38	1236.73	1624.28	389.65	338.06	244.07	47.23	83.2	77.1	11.16	8.67	11.69	215.21	134.41	132.11	623.83	513.7	703	686.01	586.61	691.06	184.61	208.11	196.12	56.84	40.62	37.54
CiPaw.10G127800.v1.1	810.89	735.11	683.16	141.33	232.58	152.06	334.16	331.46	405.79	475.19	518.96	541.03	531.21	824.9	598.01	959.99	907.23	994.66	1423.64	1420.68	1356.04	1082.81	899.32	916.89	963.43	905.14	1010.05	1195.16	1163.9	971.34	807.52	557.6	797	840.73	613.42	875.26
CiPaw.15G021600.v1.1	105.7	80.79	89.1	816.86	584.85	573.23	830.04	726.61	824.39	471.97	568.35	584.8	397.33	311.23	253.05	145.77	255.41	264.49	61.34	77.54	76.61	405.69	326.86	276.28	576.55	492.3	580.35	484.38	480.86	668.99	324.32	356.28	356.72	118.02	247.25	147.17
CiPaw.09G037900.v1.1	1072.65	1011.68	1074.05	75.42	63.42	82.09	106.83	228.81	137.83	413.29	510.17	474.31	680.08	468.61	752.08	698.3	388.57	407.66	109.67	112.15	134.73	198.88	183.32	101.97	444.58	564.47	604.13	624.67	418.64	343.51	508.26	648.3	514.98	447.51	388.66	456.04
CiPaw.08G143300.v1.1	2.55	3.34	3.24	451.65	228.91	403.93	286.83	407.89	477.45	427.58	383.77	476.72	263.33	74.72	211.18	69.46	133.35	108.02	3.9	7.2	14.08	689.34	518.11	582.91	455.78	738.44	913.12	519.65	311.09	478.63	122.22	142.39	157.24	36.1	25.47	62.62
CiPaw.02G106000.v1.1	32.46	37.37	27.62	1097.12	782.15	1006.2	990.26	767.48	1013.19	642.41	737.64	789.22	313.55	265.84	305.09	158.11	134.19	157.28	25.34	19.51	21.79	423.23	408.35	310.87	442.1	492.96	469.57	440.34	286.23	446.9	137.25	137.41	130.28	62.77	71.7	84.11
CiPaw.02G093100.v1.1	340.7	329.73	320.91	837.63	799.73	806.21	1519.13	1832.98	1733.62	1156.64	1404.38	1363.85	660.06	599.09	545.19	625.73	429.03	532.34	482.78	495.28	432.36	629.9	490.92	618.74	1027.6	750.74	912.76	1027.92	1152.3	865.97	439.74	285.61	455.96	436.66	276.58	330.35
CiPaw.04G062700.v1.1	391.25	428.72	436.78	1324.91	1129.52	949.58	1170.42	727.19	1073.55	817.02	1243.09	982.97	454.79	616.11	415.36	354.23	368.77	370	536.82	503.41	535.18	930.92	852.56	709.32	682.22	669.78	625.17	792.33	914.86	989.1	531.27	624.99	509.7	310.96	407.02	429.04
CiPaw.01G299700.v1.1	1210.34	1239.34	1369.62	45.94	59.78	50.38	49.22	135.8	69.17	323.93	434.04	378.57	757.5	399.76	838.39	455.34	307.79	383.09	84.13	79.8	75.75	125.79	104.61	76.1	265.14	289	381.89	444.57	390.34	232.89	466.42	538.25	634.41	372.31	340.23	442.49
CiPaw.11G173100.v1.1	11.31	13.39	9.35	792.88	581.49	756.19	1485.69	1598.54	1525.42	849.08	1040.95	999.83	543.19	279.6	397.94	181.99	171.04	188.29	12.18	10.49	18.85	252.27	222.89	230.32	451	311.21	408.54	380.73	391.24	503.44	157.64	134.75	182.53	49.42	139.07	145.73
CiPaw.09G176600.v1.1	101.81	85.2	58.16	501.13	662.44	388.91	262.14	181.73	290.65	346.77	304.39	336.45	1239.86	1320.81	1698.09	823.3	1345.2	1815.78	147.78	170.41	180.02	418.14	414.11	455.24	309.99	214.58	233.88	359.79	303.07	357.51	1346.19	1070.63	1685.76	1299.67	1367.62	1048.29
CiPaw.15G042100.v1.1	1342.56	1229.88	1027.33	270.99	263.62	223.71	400.25	410	350.76	386.86	445.15	578.35	1010.22	712.19	815.52	749.48	706.3	824.42	602.86	596.82	551.24	253.33	315.49	198.31	375.52	382.97	336.2	451.32	348.15	294.37	583.8	840.95	789.26	866.22	460.26	701.61
CiPaw.11G067100.v1.1	468.16	403.44	467.68	686.07	754.31	817.15	634.84	937.58	835.93	783.04	782.7	776.25	911.85	678.25	906.36	749.2	687.31	719.96	316.1	307.18	303.49	531.99	509.9	662.62	1031.2	1124.88	954.65	1200.39	1364.32	1017.01	656.74	250.38	653.9	283.26	432.11	615.93
CiPaw.06G155900.v1.1	558.77	674.25	572.74	50.83	58.49	38.1	95.24	162.46	97.93	263.36	293.48	315.75	1023.89	530.91	689.79	433.49	283.07	443.29	25.91	28.82	35.15	61.08	68.88	37.44	249.92	293.16	351.34	530.77	362.08	200.01	393.65	443.15	498.67	332	290.71	416.11
CiPaw.01G125400.v1.1	367.19	359.91	294.8	73.14	108.78	15.59	83.33	86.06	122.15	85.87	136.42	65.66	149.84	524.67	293.92	171.43	564.57	426.69	345.67	344.09	372.46	1148.26	819.67	912.33	580.7	373.54	367.77	413.94	472.34	554.81	483.08	492.01	430.22	595.24	999.47	678.28
CiPaw.12G108300.v1.1	23.21	8.36	10.31	565.93	603.4	380.41	527.57	459.48	637.32	837.18	1141.48	771.86	273.31	287.25	297.82	149.23	268.63	240.38	47.51	38.45	33.38	1214.03	1230.97	1150.31	518.57	718.29	433.42	376.94	249.55	369.59	446	453.77	253.9	640.48	635.3	212.66
CiPaw.10G016600.v1.1	509.8	415.45	422.2	1134.24	986.15	1044.45	925.82	837.39	1062.72	731.58	881.06	887.26	517.1	700.97	471.8	715.08	886.67	782.1	381.62	418.87	485.79	559.68	507.82	491.58	375.61	393.61	456.19	721.8	513.39	632.54	715.63	639.39	679.44	1134.73	777.5	798.81
CiPaw.13G014500.v1.1	530.73	447.13	416.94	211.67	232.02	121.81	312.11	289.58	375.92	761.28	867.48	833.23	526.05	777.49	600.64	389.89	561.48	559.03	725.29	662.86	675.45	536.16	461.56	382.63	945.67	1121.58	1086.61	970.34	901.44	872.78	717.09	534.88	712.13	706.23	660.95	930.17
CiPaw.05G068100.v1.1	682.15	547.07	549.1	977.91	1353.2	913.14	692.13	823.32	867.45	1124.52	851.78	981.08	1139.04	836.76	1128.82	1207.92	1163.41	992.21	575.8	534.06	566.38	880.28	1382.5	1208.48	708.21	738.1	588.35	661.64	607.96	783.26	618.22	549.7	735.99	731.46	1058.33	577.45
CiPaw.09G020000.v1.1	527.91	657.05	672.13	29.58	27.29	30.82	58.02	143.48	78.41	213.75	195.67	237.09	564.84	377.54	574.17	369.4	366.08	318.74	18.38	23.8	17.56	55.01	41.21	28.6	257.56	324.6	377.62	356.23	234.62	196.49	543.69	492.62	457.96	466.86	337.27	466.24
CiPaw.13G105000.v1.1	683.19	671.5	659.73	1684.59	1724.45	1462.02	1242.7	1252.2	1277.37	1203.64	1153.08	1014.09	1113.89	1308.74	1185.25	982.81	1203.29	1128.8	924.36	984.72	994.3	1732.36	2006.05	1902.91	1572.8	1353.39	1505.42	1263.26	1130.74	1268.91	1218.49	1668.8	1213.23	1193.21	1418.12	1035.4
CiPaw.10G081200.v1.1	627.5	585.53	540.19	12.37	15.26	14.92	11.87	7.54	9.54	12.4	11.93	18.49	183.88	693.6	330.92	829.41	943.88	825.78	854.56	934.84	1132.17	106.87	97.57	84.43	45.25	88.66	76.4	177.68	119.57	217.51	584.36	742.57	466.65	750.29	922.16	842.98
CiPaw.09G178100.v1.1	1909.92	1841.47	1793.67	863.63	815.92	814.01	2691.26	1309.07	2011.51	1087.33	1337.64	1038.5	626.15	809.7	759.99	878.6	1031.08	1076.08	1215.28	1399.2	1411.97	1111.5	1020.94	1099.06	902.41	987.18	948.58	790.04	806.93	860.46	806.61	799.34	840.97	960.01	1087.48	904.06
CiPaw.02G082400.v1.1	667.03	812.8	727.95	1387.81	1544.63	1431.83	1249.58	1230.16	1224.96	1091.29	1081.66	1124.77	974.84	960.99	980.87	673.63	715.17	673.37	858.96	781.85	730.27	1102.24	1457.01	1264.53	1088.38	968.97	964.93	808.48	689.15	875.14	674.38	731.78	578.91	776.88	827.52	660.57
CiPaw.05G066800.v1.1	429.43	485.41	467.29	966.5	1039.22	1048.02	1041.19	981.89	980.23	963.9	934.55	864.86	735.02	819.65	772.69	741.07	531.93	611.06	678	635.24	558.47	1046.29	1119.67	1032.83	971.75	977.56	1076.3	783.95	738.58	741.39	667.83	586.68	646.02	751.13	653.84	638.61
CiPaw.03G233000.v1.1	1164.08	1195.69	1035.28	135.86	93.34	133.05	69.61	124.08	71.43	247.09	285.66	271.44	848.97	612.28	938.71	756.72	561.07	578.54	138.51	135.97	212.28	214.06	305.75	164.95	306.22	241.4	346.79	430.89	338.01	241.52	574.8	1044.74	676.38	381.23	447.94	602.94
CiPaw.11G179500.v1.1	849.13	839.81	705.31	31.35	30.54	29.3	75.4	167.48	108.94	245.53	344.12	313.65	942.69	507.5	786.68	685.98	454.32	456.29	86.77	78.53	76.44	152.91	134.36	86.65	381.42	366.35	322.06	339.28	432.34	272.33	504.62	563.56	648.77	197.83	304.81	390.66
CiPaw.02G088800.v1.1	693.12	660.3	738.45	70.03	79.91	75.66	88.91	199.65	121.24	285.35	359.68	339.44	683.51	595.5	803.66	661.61	523.23	434.91	169.48	167.58	171.04	142.02	140.79	100.32	280.86	341.42	386.03	257.99	271.21	213.63	543.36	649.31	526.79	379.03	337.53	424.04
CiPaw.07G178400.v1.1	1200.45	1434.8	1413.61	18.32	22.38	12.77	109.85	133.75	119.08	230.7	254.25	323.5	807.61	468.14	691.22	478.09	359.66	497.17	48.81	52.66	49.82	53.33	39.2	33.06	353.6	375.86	461.82	420.11	375.03	250.08	504.49	466.3	657.02	294.01	315.28	506.58
CiPaw.07G212100.v1.1	1477.6	1334.26	1393.99	742.77	621.91	754.77	1541.86	1216.08	1346.1	703.82	879.52	730.16	1163.23	788.3	1035.08	771.68	844.67	718.28	371.41	510.8	526.18	472.78	524.44	477.09	515.38	557.45	559.38	525.99	380.87	404.92	641.19	747.62	754.25	538.5	388.99	582.59
CiPaw.14G079700.v1.1	22.8	21.39	25.02	40.32	52.26	27.12	109.58	200.18	184.41	190.21	218.26	231.89	217.2	418.68	397.51	247.76	552.38	435.06	13.89	18.94	10.66	146.95	100.5	118.17	242.54	404.84	204.03	587.7	306.18	732.98	685.15	375.46	465.02	697.93	1801.72	642.92
CiPaw.13G132100.v1.1	1183.31	1294.25	1321.83	83.06	70.49	85.82	170.12	263.94	197.63	354.76	438.92	476.79	597.24	428.25	615.66	534.34	473.37	401.65	85.28	102.65	93.28	193.69	137.14	85.2	380.07	509.82	592.35	407.05	326.27	274.27	582.92	778.53	562.43	442.9	365.22	547.64
CiPaw.01G296700.v1.1	758.09	853.17	893.7	165.03	136.51	201.59	198.58	340.91	238.27	467.77	712.91	633.67	949.8	418.26	874.69	653.14	425.17	443.24	61.16	72.63	94.91	175.04	136.9	90.61	323.6	363.29	446.73	408.39	339.64	241.87	478	729.94	497.26	367.56	265.11	398.64
CiPaw.11G151900.v1.1	189.45	200.96	159.22	33.89	29.76	8.89	256.82	103.7	223.79	337.05	430.92	457.69	156.2	387.38	301.99	84.99	350.52	319.61	112.01	93.92	82.58	155.88	124.49	133.17	570.33	365.85	457.17	733.6	632.43	599.76	792.54	584.82	559.41	796.45	514.71	475.18
CiPaw.13G051700.v1.1	603.11	623.46	652.14	1072.51	1329.58	1031.3	1515.92	1350.14	1439.7	1267.26	1191.07	1364.55	1643.63	1452.04	1488.05	1162.67	1010.59	1171.3	1474.7	1565.15	1429.59	1112.82	1512.74	1611.1	1400.7	1639.3	1318.7	1281.6	1237.24	1000.58	1347.87	1475.86	1168.16	777.18	725.14	641.87
CiPaw.13G086000.v1.1	278.69	225.71	243.34	700.36	484.47	441.69	2015.51	980.04	1497.63	542.91	516.91	668.02	535.92	430.13	495.72	307.96	481.5	571.38	836.27	1089.52	836.63	498.42	638.82	815.9	466.24	632.14	486.5	542.2	388.95	304.33	420.39	703.17	275.61	85.75	85.02	113.3
CiPaw.07G226900.v1.1	657.83	766.82	700.14	121.61	147.09	139.05	543.55	460.75	499.76	412.63	394.69	534.88	680.29	378.92	570.49	209.88	327.64	192.27	38.85	30.84	42.4	93.91	56.91	47.76	344.1	502.76	607.66	475.92	276.65	262.01	355.24	318.79	331.1	342.92	133.47	306.06
CiPaw.01G262600.v1.1	136.9	132.38	150.99	309.47	291.88	259.09	664.96	553.18	608.29	718.93	670.54	742.44	879.34	473.58	642.47	351.14	314.02	493.25	373.43	398.26	368.7	467.72	524.81	596.93	688.23	841.42	727.87	767.91	699.12	498.59	408.29	498.49	451.37	159.28	164.97	134.95
CiPaw.06G099300.v1.1	1443.53	1565.36	1452.13	990.75	1017.46	812.97	1010.83	894.22	987.04	924.91	938.39	969.63	980.51	1426.9	1124.96	1176.27	1332.23	1383.96	1672.47	1705.93	1691.31	1331.99	1260.49	1324.88	1608.05	1805.34	1537.65	1534.49	1607.84	1686.09	1568.51	1482.95	1482.92	1610.2	1527.82	1520.42
CiPaw.02G184000.v1.1	607.73	789.57	716.92	492.03	380.35	441.85	380.86	335.99	318.85	351.77	307.94	412.09	1277.9	647.72	1082.37	480.41	721.49	559.23	89.2	112.23	131.13	194.91	189.99	198	258.23	277.84	384.82	422.16	261.21	202.86	678.32	724.49	762.41	537.38	406	652.05
CiPaw.15G085400.v1.1	97.29	87.9	93.98	135.23	131.58	151.45	328.1	517.36	479.78	517.44	352.95	440.89	404.52	283.69	425.23	431.31	297.84	279.21	22.42	22.89	18.73	89.3	95.95	146.74	471.19	484.46	499.99	701.84	656.5	686.67	343.92	117.84	338.37	130.7	213.66	358.83
CiPaw.04G053600.v1.1	324.36	287.77	278.49	209.26	370.2	313.09	608.76	427.04	422.7	377.3	354.77	340.08	355.88	715.61	535.14	251.07	296.13	242.83	704.65	664.56	558.86	639.66	524.91	625.53	783.5	712.8	666.39	1045.35	968.16	933.8	689.38	434.71	623	720.72	784.77	720.44
CiPaw.10G036900.v1.1	753.94	903.26	871.07	190.39	189.62	174.75	292.55	246.3	231.86	333.71	394.55	367.44	892.33	907.59	1001.93	693.47	735.4	721.73	353.76	394.72	424.71	232.83	218.22	165.28	308.72	363.8	401.75	446.57	379.19	293.29	763.51	954.23	906.34	504.84	564.96	879.43
CiPaw.15G060000.v1.1	1263.16	1184.96	1365.44	230.81	411.05	247.58	129.41	137.9	180.36	126.72	160.61	177.9	537.29	637.97	484.45	455.58	257.85	431.87	1376.07	1480.88	1391.04	725.49	467.86	440.43	162.41	279.93	315.07	175.21	384.71	132	400.25	169.04	403.35	100.44	225.59	187.03
CiPaw.01G153400.v1.1	264.86	279.83	289.23	452.55	433.24	496.67	1259.95	1078.97	1209.6	818.73	973.22	884.67	567.28	481.29	694.97	509.93	567.55	435.29	163.29	152.63	156.12	108.66	118.73	172.18	419.6	317.05	396.41	408.79	352.89	316.06	632.06	588.86	705.25	690.85	520.22	555.05
CiPaw.12G094400.v1.1	1272.42	1175.4	1289.29	219.25	243.2	235.83	240.98	330.48	321.37	482.26	662.35	643.56	917.73	617.81	955.94	670.21	512.35	649.23	63.31	49.68	65.16	181.61	170.05	142.17	289.62	353.3	375.7	506.19	449.25	373.98	463.4	560.24	670.44	339.6	364.19	405.63
CiPaw.05G236100.v1.1	255.41	216.89	250.69	661.9	713.05	635.24	847.31	764.4	970.65	710.81	787.22	909.4	532.55	428.17	500.14	413.53	362.3	379.24	384.27	348.37	329.45	641.51	644.55	516.42	578.89	730.53	671.79	818.31	909.54	779.16	476.7	383.06	522.6	325.05	391.63	357.02
CiPaw.01G303300.v1.1	335.92	308.05	293.66	509.15	373.87	622.33	810.69	1031.88	815.26	688.76	562	596.88	895.68	715.45	868.62	1001.91	1034.39	782.52	372.31	394.83	494.73	370.84	309.17	331.9	491.28	464.79	457.66	541.78	388.79	344.09	498.13	536.14	578.34	1085.69	636.1	922.85
CiPaw.07G111400.v1.1	78.86	83.56	84.03	1209.64	817.72	948.99	1517.68	1027.04	1548.55	617.09	814.99	976.13	274.99	253.43	194.23	133.75	169.02	159.21	66.68	66.52	66.75	324.98	242.01	210.41	484.19	413.2	487.99	569.6	576.49	573.61	231.13	231.14	221.03	117.69	157.18	159.76
CiPaw.03G071400.v1.1	585.75	489.35	433.84	650.81	552.14	463.37	418.36	661.4	502.68	648.21	664.89	699.82	397.11	611.68	541.37	135.63	418.78	282.63	355.88	272.7	260.21	168.32	180.56	199.36	691.53	866.08	604.9	310.94	307.64	354.86	381.44	224.45	460.02	676	749.75	796.61
CiPaw.04G097000.v1.1	5.56	9.04	4.94	326.87	418.4	272.89	424.86	216.9	343.5	796.58	998.6	1386.07	884.02	468.69	541.09	299.36	438.52	885.29	7.99	4.54	9.28	442.28	433.09	413.41	293.85	327.88	398.09	934.26	810.22	868.4	152.51	537.71	293.45	172.08	344.6	205.18
CiPaw.10G078400.v1.1	579.73	847.61	681.93	25.42	26.37	18.64	315.55	204.82	280.67	121.68	107.66	104.65	340.55	238.97	299.82	108.48	157.69	140.21	617.81	534.15	437.17	70.54	60.58	74.46	293.22	444.93	284.44	216.27	346.02	198.51	448.18	621.54	612.94	675.14	453.39	386.9
CiPaw.16G114100.v1.1	1036.17	910.79	1016.94	759.99	888.91	785.18	486.77	716.35	682.15	859.55	894.19	771.66	1260.66	1200.5	1120.32	1989.27	1304.44	1386.71	836.79	782.57	792.21	1097.94	1315.83	1219.32	897.8	1342.01	1101.15	1144.88	908.47	1105.02	810.36	860.29	978.19	642.73	672.82	840.74
CiPaw.02G067800.v1.1	284.57	276.1	259.42	46.88	75.66	14.75	64.39	54.59	85.9	57.34	100.41	53.83	99.35	365.62	208.42	123.23	366.2	312.43	206.42	198.59	226.59	901.92	586.23	696.23	452	299.82	345.36	404.21	406.12	478.84	383.16	371.88	334.47	633.91	882.09	551.22
CiPaw.08G016600.v1.1	257.24	237.74	259.2	910.97	1042.82	829.06	736.98	843.92	883.93	682.15	675.42	668.57	609.92	426.32	528.72	467.62	411.82	443.84	273.69	260.65	263.99	498.38	526.69	502.61	557.19	541.96	599.47	554.37	560.22	605.26	346.11	320.12	421.92	175.78	221.28	238.13
CiPaw.07G148800.v1.1	174.65	162.25	178.73	387.29	355.86	569.33	837.44	932.28	767.72	575.72	692.85	577.9	625.51	355.4	878.79	229.62	386.1	300.1	27.61	28.96	31.7	58.81	58.46	59.11	248.42	278.7	346.22	155.32	148.94	155.91	333.53	316.31	411.88	371.09	236.33	328
CiPaw.08G158000.v1.1	800.77	719.7	759.43	270.09	294.1	333.25	595.49	778.09	717.02	784.5	824.44	837.63	603.65	631.51	608.03	880.4	568.09	673.32	794.85	717.5	722.23	435.21	453.9	407.6	545.29	588.23	623.84	404.97	476.25	619.26	425.18	385.23	400.9	303.77	357.04	532.88
CiPaw.09G191800.v1.1	1167.39	1132.33	1126.6	511.66	558.98	436.72	550.51	494.9	505.9	322.79	378.7	284.33	669.82	838.15	716.32	1147.38	763.33	838.04	1108.81	1318.91	1539.45	596.58	746.29	738	661.92	645.36	577.81	342.36	329.47	348.31	463.05	704.67	507.4	423.28	342.08	469.92
CiPaw.13G096900.v1.1	1095.77	958.85	1092.41	406.11	476.43	500.82	965.48	1100.66	1051.07	1158.18	1191.17	1207.29	987.21	959.01	1063.45	1670.64	833.76	1055.28	1635.44	1521.87	1562.81	884.63	920.62	752.73	1069.22	1039.4	1185.15	1133.14	1207.99	1294.59	693.54	521.24	809.4	622.35	524.97	748.29
CiPaw.03G102000.v1.1	571.27	636.69	658.39	25.27	36.09	19.83	47.01	97.14	44.5	173.94	251.32	229.75	879.41	318.56	632.46	278.26	157.75	214.63	4.56	5.14	6.98	37.01	43.63	19.59	198.87	241.54	299.23	370.28	258.53	146.98	317.18	395.36	395.57	239.32	126.33	180.73
CiPaw.11G051900.v1.1	195.07	193.53	197.96	364.63	334.42	259.45	1560.64	710.94	1174.37	592.54	496.21	594.92	362.27	224.44	243.76	270.03	189.46	270.69	795.85	947.21	787.22	432.7	559.72	601.78	465.7	597.02	481.54	401.93	361.68	255.55	204.7	289.84	210.25	103.1	112.51	84.37
CiPaw.04G103600.v1.1	448.55	546.09	543.3	196.89	176.26	229.19	191.53	328.55	225.4	559.4	568.34	608.99	1264.22	849.26	1268.29	549.78	542.53	510.4	70.51	72.54	81.71	170.69	153.3	109.78	399.05	513.3	578.62	476.87	329.28	291.3	685.42	896.46	698.04	456.65	418.07	497.93
CiPaw.08G157200.v1.1	458.26	412.81	424.3	513.56	570.62	485.65	395.34	368.92	363.81	336.86	372.84	293.61	215.67	189.31	189.47	229.95	154.91	197.52	678.68	726	645.89	827.58	952.58	1137.51	680.57	868.31	761.05	354.63	340.64	245.78	223.72	220.77	203.78	98.74	88.19	92.68
CiPaw.13G139100.v1.1	478.46	568.73	555.33	1366.13	1194.11	1141.28	894.15	922.2	880.08	878.59	929.06	857.2	774.4	701.23	721.85	504.91	675.84	597.86	505.23	452.82	483.19	1192.64	1138.92	1100.47	873.23	945.02	713.84	593.83	547.63	638.63	654.82	683.51	636.21	726.85	874.72	740.83
CiPaw.01G144900.v1.1	1106.66	1183.88	1237.95	658.98	654.26	692.25	761.59	851.94	849.38	1089.87	1252.51	1203.98	1083.81	759.83	954.47	696.7	858.16	770.54	295.94	336.99	375.16	992.78	851.59	762.17	915.83	934.51	1026.24	815.37	720.07	727.97	646.58	596.41	607.54	681.51	597.93	575.1
CiPaw.01G047000.v1.1	1095.64	1140.78	1086.18	15.55	25.64	26.44	20.72	49.58	27.6	112.9	103.46	97.48	338.62	381.12	465.1	432.3	295.47	309.24	140.68	163.57	196.22	105.5	81.02	67.7	197.86	241.75	311.16	329.64	265.56	145.39	457.38	466.56	532.57	356.45	314.6	434.94
CiPaw.05G250800.v1.1	449.92	392.46	405.4	10.47	17.97	12.11	21.32	15.7	19.99	47.54	43.37	60.27	197.14	422.87	251.37	531.21	521.1	591.62	551.4	553.04	656.55	113.58	87.13	74.3	88.1	148.36	137.32	123.04	129.8	145.28	351.05	191.58	332.96	392.18	338.63	439.78
CiPaw.03G145400.v1.1	902.99	819.85	790.66	559.29	486.16	540.22	598.84	700.01	633.22	730.68	673.41	653.35	902.24	1047.25	1003.65	1230.58	1116.69	997.56	920.81	919.76	918.68	812.49	732.09	572.64	587.92	556.9	578.56	798.65	791.24	836.08	897.94	900.36	868.77	1007.77	1259.14	1171.51
CiPaw.03G169300.v1.1	71.25	68.77	73.28	360.74	473.7	340.39	1312.34	997.32	1574.4	473.84	738.62	719.22	40.48	26.27	20.45	245.85	257.41	257.86	186.62	223.5	268.8	337.71	383.53	366.24	274.51	274.21	277.93	160.1	313.88	225.03	36.13	32.88	52.9	65.88	78.64	172.1
CiPaw.15G088400.v1.1	915.91	971.33	859.98	252.85	146.68	169.99	885.57	332.96	589.56	191.65	155.19	220.09	649.01	392.38	381.49	368.71	409.33	628.5	684.84	804.93	766.39	289.54	285.81	365.56	233.95	343.53	275.36	221.39	207.2	122.72	331.91	517.03	290.02	112.1	117.83	130.21
CiPaw.13G063200.v1.1	100.84	70.36	59.32	351.63	516.52	454.14	290.97	233.7	275.9	366.45	217.91	155.39	144.8	221.48	209.36	164.98	324.35	326.36	116.49	99.39	126.73	1139.39	1093.03	1364.35	400.24	287.72	375.4	406.91	298.13	492.1	466.18	920.59	409.82	1132.89	750.14	605.83
CiPaw.15G175200.v1.1	958.33	1031.27	1088.04	208.73	162.19	172.08	259.9	333.35	301.68	399.32	428.09	434.42	674.53	506.02	703.28	694.3	468.55	469.39	224.32	233.35	227.43	235.63	268.86	205.21	386.1	404.02	507.25	583.96	488.95	389.72	507.73	578.7	639.45	469.76	401.58	536.14
CiPaw.15G153100.v1.1	656.14	555.56	512.36	101.77	102.87	88.39	129.31	131.94	141.89	253.79	268.69	212.39	285.28	417.16	326.75	573.84	367.88	519.9	763.96	744.79	757.27	245.24	224.29	213.81	347.36	344.12	380.11	314.24	351.84	379.09	577.5	470.8	543.3	819.22	475.42	634.2
CiPaw.08G020400.v1.1	113.94	90.58	108.41	866.27	699.1	923.69	1189.99	1249.84	1250.12	890.71	1304.36	1090.09	214.28	131.02	194.51	123.65	153.58	138.79	82.43	72.87	71.67	456.93	256.78	328.03	446.57	482.99	543.81	408.48	365.29	391.7	131.2	160.05	142.19	202.73	118.4	197.96
CiPaw.07G107500.v1.1	254.87	229.83	271.58	1151.8	1227.3	1040.7	2505.67	1630.86	1973.6	974.67	1297.67	1188.77	808.73	568.44	629.7	375.29	220.67	309.65	279.04	303.08	320.08	376.39	373.21	283.45	400.95	369.44	363.11	506.62	570.58	459.08	258.29	198.46	312	118.68	148.43	172.27
CiPaw.01G185900.v1.1	333.57	275.16	349.77	2.96	12	7.67	14.66	12.5	17.72	8.7	14.14	29.76	201.25	926.78	393.01	388.59	375.55	381.48	481.21	317.38	406	27.43	42.23	39.65	129.15	437.49	216.27	246.64	254.55	343.79	359.34	142.87	230.75	432.65	325.53	526.94
CiPaw.15G051600.v1.1	1030	977.21	984.1	90.59	105.82	78.74	99.23	166.1	129.66	209.17	226.04	255.61	536.33	487.23	593.16	778.95	398.69	545.51	204.01	218.83	230.98	213.97	210.95	167.95	434.41	511.94	548.81	489.2	417.67	332.93	424.74	494.73	543.77	315.96	293.18	375.47
CiPaw.04G125300.v1.1	718.04	660.91	672.21	1071.04	1218.21	1258	3024.95	2969.76	2848.26	3204.63	3048.34	2955.86	2321.76	1343.04	1931.9	1341.69	1126.85	1054.86	976.36	1035.36	860.85	999.89	1155.33	1187.5	1144.37	817.23	1018.43	1044.13	1247.69	1478.03	1122.13	1097.4	1257.12	821.91	1025.81	1093.39
CiPaw.03G168600.v1.1	100.4	101.73	90.42	260.33	392.48	269.25	1077.49	700.54	1197.77	364.88	492.23	547.56	55.68	35.25	13.32	252.27	191.74	221.8	202.12	231.89	285.64	403.89	395.19	335.24	264.45	404.12	433.52	204.63	244.55	241.89	46.9	32.99	58.72	97.53	76.61	143.99
CiPaw.01G238100.v1.1	730.55	694.93	749.15	431.44	528.28	531.14	678.52	702.08	686.04	531.14	551.81	582.24	606.53	964.09	676.88	781.97	589.99	599.94	1109.59	1117.02	1017.06	905.99	848.63	734.03	1161.3	1014.68	1027.63	934.23	1042.32	1215.15	757.81	699.44	784.23	722.76	804.09	882.09
CiPaw.07G093000.v1.1	23	5.89	9.12	3050.68	1435.53	3370.59	863.14	1054.75	726.29	843.04	642.93	599.6	160.23	164	220.89	61.65	136.44	176.38	2.35	1.06	4.44	320.82	865.93	418.88	289.37	186.34	222.58	173.09	73.67	332.06	58.79	116.6	61.56	166.87	211.59	55.64
CiPaw.12G009300.v1.1	604.25	620.45	595.92	291.48	201.65	251	184.38	318.84	222.62	461.27	373.38	461.32	712.04	277.59	508.37	316.26	545.41	464.52	324.68	334.14	310.72	344.36	258.2	217.24	607.42	666.49	553.32	1184.8	754.29	531.78	559.51	475.03	700.56	617.06	580.92	372.06
CiPaw.03G140400.v1.1	478.85	398.43	447.51	532.37	623.38	523.18	778.03	991.09	1075.82	1046.22	1182.95	1047.06	695	715.11	761.84	753.85	526.92	685.7	293.32	279.34	269.11	537.66	567.76	532.85	822.16	879.86	991.83	775.59	840.88	844.47	588.51	587.86	624.33	605.43	480.3	564.22
CiPaw.02G078200.v1.1	1.81	0.98	0.67	432.55	429.69	468.78	291.33	261.96	217.68	242.7	215.86	167.13	91.49	135.43	190.79	105.78	47.54	74.62	1.5	0.63	1.16	432.69	431.69	442.27	640.82	326.38	637.46	362.69	345.64	665.79	286.95	105.77	235.47	174.75	462.28	141.18
CiPaw.12G040800.v1.1	275.42	314.88	280.17	179.67	199.09	163.89	73.94	45.82	57.19	66.06	68.59	53.18	360.65	315.3	375.97	286.1	239.64	338.94	193.55	185.44	241.7	373.2	391.13	418.14	67.68	55.36	62.74	75.42	69.59	44.39	295.79	369.93	461.93	188.18	236.5	424
CiPaw.09G063200.v1.1	644.8	865.09	693.74	503.85	557.11	402.43	282.83	302.44	228.5	271.89	293.17	299.22	358.11	403.87	367.38	354.25	603.86	497.74	1006.63	1036.95	843.8	285.09	221.79	413.77	610.3	584.16	624.05	447.06	450.32	349.74	592.29	444.85	507.23	1166.2	676.91	901.25
CiPaw.09G060900.v1.1	1346.37	1658.73	1201.91	232.31	365.13	218.41	594.97	417.65	400.47	362.5	348.93	281.6	299.25	326.81	339.05	228.28	456.97	383.11	1428.61	1392.25	1095.67	823.88	602.02	758.83	564.87	695.95	589.95	513.23	506.88	290.43	370.55	323.35	396.67	840.39	375.15	544.25
CiPaw.10G057400.v1.1	103.96	108.35	104.77	694.19	480.86	519.01	765.46	580.07	758.98	470.11	531.39	603.83	296.89	250.27	209.57	167.15	237.85	208.1	97.53	101.7	109.3	346.02	389.05	316.94	412.18	363.89	465.18	507.62	443.28	529.46	295.81	364.28	254.73	198.16	278.39	185.24
CiPaw.03G146000.v1.1	903.3	746.65	894.78	425.08	549.22	309.51	757.72	756.18	951.52	1015.67	1039.13	1245.81	786.89	1224.92	879.84	1293.76	1194.21	1182.45	978.25	878.67	894.86	904.65	788.26	656.48	1160.15	1068.46	1103.94	987.37	1249.24	1205.84	1042.37	535.63	1007.31	794.66	839.55	805.84
CiPaw.05G261800.v1.1	612.92	696.35	806.38	131.33	149.21	189.06	127.88	243.2	142.91	370.79	381.01	402.41	705.25	614.71	774.74	641.56	510.34	492.55	281.77	387.8	526.48	200.33	312.46	153.92	224.9	297.88	320.9	329.38	215.4	257.98	453.2	956.89	408.34	477.01	507.42	472.4
CiPaw.05G259800.v1.1	409.99	444.57	506.53	88.41	97.49	114.01	119.88	190.3	127.68	237.11	330.29	264.41	503.02	349.07	558	418.17	279.98	299.43	98.25	104.35	133.57	155.39	123.05	128.41	222.86	207.88	268.62	402.87	362.77	291.87	450.6	461.43	501.94	265.95	413.49	358.72
CiPaw.01G217600.v1.1	700.59	868.01	916.19	44.09	47.22	36.7	32.3	54.09	28.99	124.03	117.77	150.09	554.32	378.77	503.43	386.92	318.22	380.95	94.81	108.53	145.65	80.94	65.84	56.92	159.77	171.69	231.53	306.71	218.39	131.28	397.12	547.37	482.82	302.28	293.02	389.74
CiPaw.01G296500.v1.1	93.9	80.03	101.72	124.7	187.09	171.49	303.21	441.97	493.49	328.97	348.42	400.85	277.36	407.98	344.98	273.28	195.56	268.37	58.8	56.09	66.87	374.33	293.52	260.69	476.57	411.57	536.5	486.71	385.53	511.56	161.9	121.9	171.91	62.86	85.2	111.56
CiPaw.05G234900.v1.1	661.68	777.38	641.29	300.75	327.29	234.86	361.76	321.86	344.51	364.42	336.91	386.47	374.05	563.25	472.1	389.76	640.1	519.03	715.39	739.35	644.06	282.79	285.12	325.82	550.7	522.83	579.61	475.06	504.1	401.01	649.87	552.77	649.51	763.73	633.75	677.6
CiPaw.09G019900.v1.1	332.48	430.84	428.1	58.85	53.35	65.38	117.27	206.87	113.28	245.46	197.63	258.08	570.23	355.79	546.56	310.06	324.45	275.8	15.05	18.06	17.67	65.54	75.25	39.97	263.39	302.23	328.17	348.09	218.04	208.86	507.43	518.13	390.38	422.53	337.54	377.9
CiPaw.13G084900.v1.1	23.33	23.05	17.97	471.66	362.03	297.17	1387	457.54	978.73	252.49	122.64	246.87	895.74	356.18	485.97	150.97	383.84	345.02	154.33	200.68	140.83	263.33	342.98	493.53	278.62	285.77	314.41	258.07	222.21	107.44	431.22	392.09	442.62	71.18	116.07	102.99
CiPaw.09G172300.v1.1	134.71	119.59	122.6	1110.32	1142.97	1403.84	1064.27	1108.22	1030.23	873.83	928.12	826.39	599.47	390.44	524.82	574.77	531.33	444.82	44.1	42.9	45.91	423.95	520.28	618.42	433.16	503.79	561.04	440.52	326.52	437.25	450.7	582.67	485.4	693.66	382.07	541.33
CiPaw.10G155500.v1.1	458.86	434.54	383.16	119.91	207.86	110.81	86.29	66.91	85.45	96.57	103.86	116.16	278.61	424.14	399.94	260.98	490.26	552.19	221.13	248.84	245.58	260.01	257.91	212.11	185.06	146.9	138.85	182.79	181.48	167.42	620.75	767.26	558.31	839.05	536.51	560.43
CiPaw.15G127900.v1.1	588.68	509.63	516.62	405.09	496.22	387.77	185.97	291.29	277.49	271.59	252	243.65	386.95	553.28	476.66	860.07	653.42	711.34	683.81	669.48	731.87	503.76	494.86	459.09	264.88	310.18	276.08	277.01	345.45	318.23	495.78	228.63	450.41	471.86	479.47	458.38
CiPaw.14G103800.v1.1	668.15	508.79	523.83	116.23	142.31	106.5	92.71	122.87	158.76	195.77	200.41	179.97	292.1	396.01	332.4	1022.53	800.3	833.34	462.6	458.89	566.8	721.65	541.35	536.47	257.92	363.71	238.13	355.69	315.12	324.28	259.96	226.26	285.4	327.28	298.52	357.49
CiPaw.04G048200.v1.1	268.52	384.71	355.71	11.92	8.72	10.82	26.16	75.22	29.74	178.49	167.02	227.38	529.06	270.9	513.47	227.5	207.16	196.31	12.4	12.25	11	51.06	49.44	18.81	195.47	254.21	274.87	270.81	199.37	166.57	368.82	563.5	351.85	238.38	183.24	284.25
CiPaw.07G211800.v1.1	93.68	80.53	84.85	980.45	710.57	1038.13	1123	1362.48	1205.89	833.42	1171.76	934.81	294.17	193.5	217.51	194.06	181.43	174.9	93.61	88.05	95.04	411.95	317.77	318.63	351.74	284.03	314.98	268.62	315.77	334.7	144.13	192.29	168.81	130.15	115.43	180.56
CiPaw.01G302900.v1.1	54.17	63.99	59.36	665.67	605.6	570.39	1061.24	745.26	1051.25	754.71	828.03	936.45	100.01	144.48	122.84	132.65	212.78	215.18	93.96	99.15	92.82	211.84	197.24	213.2	465.66	394.3	560.51	458.9	486.44	481.69	150.51	108.76	134.86	179.7	170.37	136
CiPaw.10G070800.v1.1	530.89	455.21	473.71	6.33	14.97	6.17	63.8	54.22	67.64	115.16	127.11	154.32	237.52	501.19	347.19	480.04	363.38	387.53	1003.09	873.37	931.15	212.36	246.42	214.21	445.44	381.63	505.13	362.78	485.25	490.9	538.94	148.1	444.22	381.69	361.43	441.49
CiPaw.10G051900.v1.1	301.33	360.25	296.98	110.16	94.43	150.98	80.39	149.48	75.89	247	323.69	309.37	728.01	413.06	684.54	618.14	473.18	469.67	57.76	75.5	117.17	208.87	178.61	137.87	215.97	224.14	270.72	313.59	206.74	191.46	413.59	624.17	417.4	425.17	338.31	447.99
CiPaw.07G150200.v1.1	202.99	230.53	234.08	143.17	115.57	152.95	508.1	347.35	417.84	605.33	527.57	724.07	225.57	141.56	230.84	323.76	644.23	573.93	152.91	176.82	169.43	338.62	438.29	629.76	414.83	273.5	409.69	533.09	252.06	471.01	314.82	488.83	183.81	217.32	150.94	127.55
CiPaw.11G074600.v1.1	768.64	817.71	774.65	379.87	381.09	466.24	329.05	392.1	289.02	365.82	371.03	384.95	882.04	705.47	812.56	613.11	806.67	644.4	436.69	565.49	513.08	348.68	304.07	271.6	378.25	393.55	464.97	610.58	424.33	372.62	681.47	689.27	701.17	800.24	541	632.49
CiPaw.09G057600.v1.1	2.03	2.59	2.96	1513.16	1255.28	1755.66	2240.7	2066.45	1756.73	1130.6	1300.1	991.14	498.53	217.86	545.89	102.26	97.5	109.85	0.82	1.5	5.61	110.82	81.33	116.62	377.8	188.55	319.83	172.68	150.4	229.63	122.41	108.94	115.41	49.95	108.14	78.58
CiPaw.16G097400.v1.1	425.28	333.72	359.51	565.89	449.17	589.25	768.53	325.07	548.38	278.72	400.57	379.71	86.86	126.48	132.41	558.83	474.2	439.91	99.06	148.38	192.49	613.23	318.33	258.43	122.2	181.63	151.97	115.16	105.57	140.12	151.41	198.9	133.25	255.21	202.62	271.26
CiPaw.06G104900.v1.1	5.31	3.61	5.47	430.73	427.68	448.32	399.62	366.93	379.28	531.27	572.62	610.18	253.2	185.92	191.28	156.66	203.74	218.85	39.57	23.57	36.31	458.43	473.29	377.3	223.75	320.58	325.19	186.94	114.96	290.71	105.85	239.11	105.05	186.64	216.67	103.56
CiPaw.06G154900.v1.1	179.32	182.33	147.48	168.14	239.93	131.46	640.86	297.68	545.56	504.33	674.02	715.06	550.28	808.05	638.55	1688.51	1280.04	1509.9	593.91	796.9	901.64	1295.66	983.72	1122.87	717.78	725.44	643.42	730.92	666.49	672.99	757.08	518.32	670.33	716.63	453.41	738.45
CiPaw.08G047400.v1.1	406.39	551.86	479.53	20.09	23.6	11.47	83.03	98.91	85.45	140.14	87.96	121.99	480.19	321.76	345.61	267.43	165.63	318.04	54.74	60.91	51.94	38.72	24.13	42.19	271.41	282.4	300.24	347.46	271.33	199.72	231.72	333.04	399.92	139.17	176.38	319.73
CiPaw.13G088600.v1.1	38.08	25.11	42.4	398.62	317.38	426.04	459.69	506.04	426.42	660.83	488.85	513.33	485.06	324.32	453.3	269.17	279.63	275.84	110.92	104.99	131.3	216.87	277.58	235.92	343.06	290.59	379.59	446.49	413	454.66	240.96	214.28	232.96	151.59	230.35	191.69
CiPaw.02G086200.v1.1	22.27	16.58	18.29	1306.2	1223.4	1615.47	706.85	779.23	551.67	967.82	1046.72	887.46	387.46	112.48	256.04	197.71	158.44	194.76	33.31	23.15	28.14	299.78	297.57	340.41	139.04	79.34	117.98	137.1	112.29	203.23	108.64	158.27	104.37	153.72	177.56	92.95
CiPaw.15G023100.v1.1	769.72	756.37	659.47	5.8	8.2	3.12	40.43	18.94	45.6	32.65	79.86	82.49	97.81	275.84	159.38	157.99	195.38	167.29	538.3	584.33	508.66	78.05	65.13	66.18	239.14	176.22	195.61	367.16	370.6	325.54	376.48	226.32	343.8	218.08	323.51	204.41
CiPaw.11G207100.v1.1	534.48	563.14	585.43	541.97	567.84	481.85	535.46	613.38	611.78	548.07	572.74	543.51	462.63	380.78	356.87	439.53	340.06	357.4	667.37	682.64	669.35	633.1	784.21	764.42	622.07	669.57	673.39	385.44	441.85	384.3	287.09	370.86	277.82	272.24	227.77	237.58
CiPaw.01G285400.v1.1	291.14	273.19	271.76	464.36	470.85	378.85	572.86	423.26	481.37	242.23	267.34	200.72	326.94	314.31	321.1	383.03	306.41	357.42	605.26	652.31	590.16	338.1	498.15	547.15	504	498.33	392.66	169.54	168.28	166.56	263.48	344.43	205.88	166.21	139.36	141.02
CiPaw.12G119200.v1.1	353.72	345.03	350.86	16.1	21.98	18.23	26.67	35.21	33.44	63.49	54.82	79.77	207.54	341.55	269.06	352.26	517.55	370.4	188.83	188.68	185.07	108.95	58.87	63.56	122.67	157.48	158.27	191.71	190.83	148.79	375.03	273.25	316.72	414.08	262.68	331.6
CiPaw.07G159200.v1.1	415.78	484.4	460.13	67.6	91.54	45.47	109.38	100.63	132.42	123.07	161.43	136.23	245.09	506.21	329.26	249.35	503.15	409.65	237.23	228.76	246.61	567.66	410.52	457.42	377.34	334.15	306.39	401.61	402.16	491.85	475.13	616.63	376.67	551.52	650.86	388.01
CiPaw.13G177300.v1.1	760.99	741.75	681.2	243.84	290.92	171.97	284.62	292.41	332.7	514.11	628.19	534.37	287.03	463.14	367.25	284.59	437.82	402.79	811.49	736.33	671.91	650.45	643.53	600.3	749.4	721.06	699.96	743.03	793.16	715.52	596.67	357.39	568.26	683.28	667.52	708.32
CiPaw.13G082600.v1.1	408.43	364.02	365.96	689.1	665.97	667.48	750.24	722.3	730.59	530.06	622.81	570.41	345.04	282.78	298.95	433.97	326.16	345.95	558.93	602.14	564.66	463.49	524.25	526.4	553.89	539.46	529.46	422.5	496.7	378.32	210.31	201.14	235.37	200.32	162.69	172.98
CiPaw.03G203400.v1.1	108.3	130.27	106.11	162.71	168.53	145.47	123.42	140.99	154.37	188.89	158.63	174.07	414.71	478.16	460.32	766.59	653.42	654.28	232.74	273.08	382.43	427.53	267.95	257.64	227.2	275.74	228.88	347.15	252.63	274.53	517.1	709.44	518.38	601.49	600.23	645.49
CiPaw.02G063300.v1.1	4.96	28.35	4.37	271.28	494.45	946.03	617.54	285.09	179.71	387.63	333.77	263.12	108.82	143.25	51.64	156.94	102.41	294.92	10.04	5.37	5.25	66.53	75.88	106.89	365.29	292.85	385.81	781.83	128.7	783.35	50.57	48.19	59.11	53.88	93.37	222.4
CiPaw.01G247900.v1.1	669.49	663.98	674.04	24.94	31.36	17.16	19.26	46.82	28.06	69.68	56.28	80.5	436.52	372.39	483.45	283.99	341.81	411.43	71.84	72.71	92.2	82.69	70.52	60.98	152.15	182.19	217.52	166.47	146.59	114.35	383.33	517.25	445.74	335.58	224.23	362.03
CiPaw.11G052000.v1.1	318.19	313.01	271.27	138.44	147.21	123.09	139.85	109.5	147.51	139.42	156.65	153.87	140.83	283.72	175.02	166.83	299.81	277.31	402.65	379.79	425.94	606.39	407.92	475.21	387.63	381.68	398.21	385.65	377.08	458.6	336.1	277.65	351.66	459.59	548.41	509.34
CiPaw.10G041700.v1.1	10.73	8.88	7.73	735.39	467.1	621.75	898.05	538.32	928.9	600.73	700.73	820.45	151.38	107.01	86.3	40.28	74.96	78.79	13.25	8.99	11.03	220.92	152.43	212.75	261.57	237.12	316.81	286.47	283.35	306.18	66.62	167.29	95.55	50.95	58.67	40.22
CiPaw.05G023200.v1.1	204.54	200.26	133.54	287.34	247.18	192.85	421.57	391.37	480.47	448.96	1015.72	817.18	369.7	428.98	318.36	48.53	100.74	58.97	103.55	79.68	64.85	301.88	298.29	198.2	452.78	738.22	448.71	533.33	598.51	455.56	242.53	180.68	320.99	299.99	301.98	223.17
CiPaw.12G132400.v1.1	638.91	579.66	569.58	62.6	75.57	89.06	63.86	94.11	77.3	128.37	115.92	95.33	272.14	364.55	302.89	653.21	573.17	510.84	351.36	348.24	472.53	145.99	140.1	210.31	196.61	121.99	130.24	178.46	205.61	149.02	404.02	347.33	322.62	352.36	453.89	416.01
CiPaw.05G006600.v1.1	428.94	538.45	524.17	3.05	1.17	2.5	19.36	50.41	20.82	103.41	90.02	151.58	373.7	144.97	301.6	156.26	149.56	127.48	12.69	27.56	15.29	17.86	10.28	6.53	145.6	195.16	256.63	259.96	143.59	105.21	355.84	496.04	295.91	291.52	141.63	187.35
CiPaw.13G176900.v1.1	693.47	686.06	596.78	85.94	74.21	71.35	128.14	113.44	90.23	129.43	137.59	136.7	269.67	347.85	191	361.81	323.19	368.03	1002.61	1076.9	860.77	156.13	148.37	152.59	283.69	217.75	197.7	193.57	236.26	188.36	616.58	691.12	535.51	847.59	379.83	584.63
CiPaw.12G141000.v1.1	813.92	864.34	851.4	964.35	1054.55	945.61	956.87	1031.27	994.16	910.56	933.73	907.43	845.52	770.16	774.96	866	726.92	795.76	1274.6	1256.33	1173	854	1095.42	1091.62	1025.39	983.8	901.59	689.14	750.91	711.38	646.65	725.1	610.03	633.09	541.93	516
CiPaw.09G177100.v1.1	279.92	296.5	296.4	26.21	27.27	17.77	14.77	20.92	17.89	35.27	36.92	50.13	189.85	592.44	275.34	270.94	480.55	436.21	219.53	196.4	189.84	51.54	49.01	56.12	84.11	86.2	67.91	84.14	148.14	86.38	536.67	586.57	301.52	265.1	408.03	382.12
CiPaw.08G161100.v1.1	1033.62	834.22	1046.36	64.74	127.55	86.62	393.22	465.43	484.52	506.11	710.24	540.85	620.39	566.18	595.65	1961.17	813.74	971.71	1030.54	1083.74	976.19	504.37	453.79	450.34	484.23	568.81	760.54	534.33	633.14	569.31	581.97	530.16	644.56	674.59	412.69	782.56
CiPaw.13G090600.v1.1	791.4	740.43	715.77	84.03	71.92	72.84	118.79	182.78	123.95	258.81	275.15	310.39	470.01	343.65	459.92	412.03	353.92	280.98	103.58	112.36	112.97	146.14	138.45	84.21	321.81	381.44	428.62	312.62	249.25	212.48	418.55	472.29	401.64	320.62	289.81	372.19
CiPaw.16G055900.v1.1	462.76	353.94	380.64	425.66	495.1	442.32	563.07	695.69	667.41	579.22	668.23	614.38	494.31	445.24	436.91	680.64	485.94	576.51	774.92	732.12	702.56	675.37	767.13	839.94	705.14	691.55	674	477.99	720.18	622.37	514.85	380.1	502.61	232.9	343.09	332.18
CiPaw.11G134100.v1.1	626.61	647.71	551.93	423.21	458.95	443.61	1163.59	1210.04	1175.86	1040.58	1010.34	1042.39	724.68	608.11	745.5	803.88	620.66	706.97	884.56	922.91	761.16	372.55	471.15	563.73	1036.76	622.39	690.39	783.18	786.42	783.17	735.08	739.39	797.63	752.65	537	669.79
CiPaw.11G169300.v1.1	168.74	135.67	345.9	169.21	177.77	208.69	448.44	284.04	275.89	351.87	428.11	375.72	1147.8	1048.79	1347.5	1739.99	929.67	1263.24	29.09	17.43	21.98	42.83	53.98	75.14	77.3	85.19	72.61	167.94	209.57	172.99	109.38	120.56	485.28	5.26	89.64	22.03
CiPaw.06G046700.v1.1	81.09	91.36	79.32	550.56	643.54	529.1	609.73	546.85	569.05	527.04	468.87	563.07	970.52	651.48	883.46	248.93	413.83	433.63	252.81	265.66	238.01	532.85	659.02	864.59	713.31	716.46	618.71	662.65	480	407.58	627.64	532.6	640.36	343.79	318.6	301.22
CiPaw.02G198800.v1.1	309.45	380.03	355.96	56.75	78.04	27.42	75.61	66.72	104.5	70.75	102.83	85.4	107.94	356.43	204.51	115.01	437.17	371.32	262.14	231.71	268.57	568.36	435.19	458.75	411.81	420.23	372.24	319.18	294.44	471.14	369.76	354.04	273.37	658.95	908.21	453.02
CiPaw.08G047600.v1.1	269.53	374.22	299.22	17.11	18.92	10.96	57.96	96.91	64.72	138.08	111.06	150.92	516.1	265.71	428.72	217.75	187.7	280.86	28.54	23.31	22.32	27.12	23.16	22.45	194.96	228.3	223.88	311.35	236.54	172.17	303.71	324.01	474.52	151.29	165.61	340.96
CiPaw.03G059400.v1.1	207.74	264.47	248.37	11.37	11.89	6.31	12.04	11.13	11.42	25.78	15.72	18.26	134.6	185.83	140.22	407.45	442.03	308.38	247.43	265.53	310.87	145.18	73.55	71.11	87.13	116.23	83.07	126.91	89.7	83.77	256.27	519.5	284.48	401.2	363.59	442.87
CiPaw.01G294000.v1.1	33.94	29.86	23.27	176.74	152.01	142.89	496.03	148.99	342.02	352.27	236.25	398.62	614.09	366.28	523.55	162.12	338.94	436.82	141.84	137.77	159.53	318.48	293.23	396.77	198.57	230.25	187.91	643.91	478.51	432.14	580.57	379.77	545.63	181.55	261.4	259.08
CiPaw.08G008000.v1.1	589.1	577.06	612.83	67.8	82.99	68.45	90.02	133.76	105.27	181.71	233.91	231.48	487.37	384.38	489.6	524.58	340.45	370.86	140.04	141.79	156.75	103.36	103.51	77.06	228.15	244.01	284.03	277.51	334.28	219.87	369.91	380.36	442.95	284.73	310.07	324.93
CiPaw.04G040300.v1.1	215.46	259.9	220.73	55.52	52.53	53.38	45.02	40.93	46.97	76.99	57.24	61	347.39	586.04	400.17	514.78	680.89	461.55	208.46	260.86	342.18	112.66	97	100.37	74.92	102.15	81.2	140.46	103.84	105.23	583.63	774.16	534.77	605.31	445.16	763.04
CiPaw.03G203100.v1.1	479.51	484.65	490.35	10.12	8.42	5.97	28.18	77.46	42.6	140.22	149.75	174.24	348.13	225.31	395.57	403.96	274.57	209.5	21.55	31.13	16.99	30.76	35.02	8.67	146.67	179.74	175.76	132.95	103.06	103.19	294.68	471.72	248.25	219.09	164.41	200.05
CiPaw.09G078700.v1.1	1003.18	937.54	1036.74	293.82	377.04	263.94	142.48	110.93	138.9	128.83	147.46	133.2	283.73	358.81	209.41	453.56	303.94	444.01	734.55	768.51	808.51	324.04	248.21	155.09	96.15	158.19	134.35	267.47	391.94	169.24	210.57	102.3	339.89	134.28	122.13	148.31
CiPaw.09G129000.v1.1	313.94	233.54	276.51	160.71	163.16	123.31	132.3	221.91	211.5	253.62	209.68	285.91	147.57	133.36	132.5	226.76	242.32	203.7	447.7	407.94	363.86	530.89	499.16	630.58	1010.37	1020.76	960.66	1027.63	1282.88	1054.09	416.35	167.55	435.6	199.49	266.54	385.59
CiPaw.06G014100.v1.1	338.16	436.73	453.52	29.09	30.3	27.96	29	71.36	35.3	134.91	121.42	153.34	433.82	308.77	420.56	267.5	255.25	223.29	15.31	18.49	22.94	58.49	69.32	38.06	170.27	217.73	276.71	262.99	189.81	144.88	298.02	441.84	307.84	214.52	201.09	273.34
CiPaw.13G059200.v1.1	268.09	245.44	255.85	890.55	893.7	1146.75	654.36	909.83	770.96	580.88	578.73	527.6	467.44	456.81	531.32	359.4	383.3	396.84	280.22	293.31	302.2	471.83	593.16	602.01	549.04	466.9	468.44	404.62	353.41	475.54	347.85	422.06	333.43	312.52	353.51	333.91
CiPaw.15G106200.v1.1	434.97	494.88	507.63	1822.67	1270.72	1858.15	1010.76	964.18	846.13	849.48	738.74	930.71	515.1	497.13	548.27	525.96	507.95	474.26	621.46	527.21	540.12	672.52	576.16	726.01	673.57	833.34	632.55	629.72	469	616.84	506	582.07	711.35	665.66	493.49	904.48
CiPaw.03G196300.v1.1	394.53	380.19	600.71	38.55	23.6	10.6	42.04	56.97	87.74	190.11	276.59	232.51	66.8	258.89	107.4	142.89	180.23	168.48	224.7	188.2	219.6	630.56	597.97	878.73	505.2	1558.06	1282.63	420.67	259.68	422.56	223.22	159.54	184.04	87.24	89.06	107.5
CiPaw.11G005200.v1.1	376.57	348.17	361.86	28.08	30.97	24.61	72.24	60.91	82.84	81.8	98.02	108.34	112.48	233.91	134.42	194.19	178.67	194.1	383.57	334.7	333.09	169.53	136.6	98.34	196.25	312.62	237.1	332.11	373.05	334.48	252.17	233.9	267.46	391.36	234.33	275.2
CiPaw.07G237300.v1.1	424.3	451.04	421.11	74.13	115.92	72.23	61.3	103.8	61.3	131.85	124.17	130.42	440.03	299.43	353.08	363.23	250.88	269.17	80.66	93.39	97.05	189.18	185.92	151.35	296.46	354.67	414.28	318.59	245.39	173.72	365.16	362.97	398.95	252.2	238.26	336.09
CiPaw.06G162100.v1.1	204.36	170.81	164.92	513.81	453.45	458.35	406.97	602.49	413.84	409.1	468.66	469.39	360.73	256.19	353.3	131.98	238.94	169.61	101.46	82.89	74.87	110.69	63.99	116.36	349.68	584.61	346.98	217.71	149.9	250.24	224.82	103.21	229.52	361.03	269.45	232.72
CiPaw.01G064700.v1.1	452.54	507.24	495.12	60.17	79.11	67.87	60.62	100.4	72.28	148.49	128.68	161.27	415.39	403.3	369.94	386.63	321.21	332.75	168.21	191.21	215.4	109.54	114.6	88.87	187.94	219.59	226.62	283.41	244.32	190.06	347.72	428.57	434.51	222.68	226.94	420.65
CiPaw.05G127700.v1.1	307.27	353.68	359.99	32.87	31.39	39.16	71.06	125.93	76.82	142.21	125.69	148.25	353.31	295.36	399.76	305.6	417.45	228.42	48.9	76.48	63.81	48.12	58.97	49.09	171.03	201.25	252.94	187.67	149.35	139.39	306.47	273.55	259.12	299.72	200.23	310.52
CiPaw.01G110400.v1.1	380.45	427.16	397.23	970.06	935.22	891.61	785.14	747.7	748.97	744.74	801.45	722.38	666.35	560.78	586.61	420.65	497.79	457.39	470.45	435.5	461.24	959.6	954.73	893.52	710.54	632.79	625.56	508.96	522.37	532.5	438.2	489.99	467.8	473.25	535.32	500.28
CiPaw.15G083900.v1.1	151.09	117.97	135.75	365.21	335.95	332.16	365.85	379.59	488.68	316.14	369.8	425.06	288.24	373.4	272.72	398.97	309.12	316.62	134.13	144.72	147.58	444.71	538.29	468.8	596.34	688.66	672.56	559.7	487.54	582.76	262.28	131.11	272.8	159.66	215.67	222.08
CiPaw.07G112200.v1.1	26.82	25.82	23.72	668.15	424.77	575.47	1128.76	733.86	1053.78	480.85	651.52	701.13	156.62	81.02	77.84	95.35	69.25	81.57	35.23	42.59	49.71	172.81	161.56	135.79	296.4	323.4	367.35	416.23	431.02	355.29	69.33	79.29	106.58	41.12	60.89	99.55
CiPaw.06G028200.v1.1	300.39	201.49	258.88	144.4	203.15	312.04	53.16	34.55	23.43	20.07	20.97	11.73	166.28	439.7	197.18	365.29	331.35	146.02	553.22	912.05	858.16	99.86	149.08	102.29	9.01	21.55	12.71	18.53	36.2	55.73	264.58	336.68	150.23	167.44	228.38	142.15
CiPaw.08G034100.v1.1	177.47	191.35	162.79	520.43	511.59	482.94	500.12	513.39	513.22	482.69	564.22	510.29	376.1	317.18	360.51	238.51	262.42	249.49	222.9	209.02	211.63	459.69	588.48	462.03	433.83	367	364.7	331.66	321.96	373.97	260.88	317.72	252.86	227.57	287.97	262.86
CiPaw.03G113600.v1.1	24.54	24.97	28.4	262.35	227.37	279.9	189.21	333.23	168.56	252.85	170.09	182.1	776.22	462.78	998.94	408.38	362.95	294.02	15.55	12.47	19.51	107.89	192.87	107.47	69.92	69.8	76.8	108.45	104.19	98.75	346.53	386.76	334.61	209.69	259.48	306.31
CiPaw.11G193300.v1.1	436.21	448.42	425.51	36.78	51.45	49.97	155.13	218.98	183.4	176.17	181.03	182.38	323.73	423.27	403.9	819.8	641.19	641.63	325.38	293.06	294.74	116.02	119.47	166.81	366.78	243.72	212.12	380.31	411.5	380.72	434.38	396.55	438.26	418.41	582.01	671.35
CiPaw.05G082900.v1.1	722.05	634.73	543.73	239.95	264.11	214.47	753.31	618.65	777.4	802.65	837.84	920.25	823.81	910.19	963.84	1351.51	934.25	1149.33	843.28	863.93	803.31	428.15	419.69	452.63	774.33	751.82	633.93	902.47	919.83	817.22	869.1	695.23	914.27	934.22	672.44	812.65
CiPaw.15G181700.v1.1	319.77	304.72	349.89	100.48	83.76	106.91	82.16	221.24	107.79	316.05	446.09	402.43	805.1	287.95	643.7	384.08	344.89	303.35	24.14	20.94	31.95	106.98	119.14	67.82	254.61	365.45	327.47	200.14	173.83	80.78	247.55	221.58	288.91	140.62	180.56	119.7
CiPaw.06G020700.v1.1	452.24	447.44	443.63	115.72	118.08	96.7	87.69	127.95	120.96	305.12	365.38	345.85	588.78	406.68	609.23	878.24	433.29	570.35	171.61	171.66	181.92	270.83	252.97	215	436.88	444.93	512.41	459.03	402.43	387.03	485.2	614.45	506.56	524.61	366.78	442.6
CiPaw.03G095500.v1.1	304.98	377.59	298.24	1444.15	1389.1	1552.98	517.02	654	481.73	562.1	428.79	426.65	563.39	377.36	563.11	353.76	474.02	277.32	351.21	411.1	357.03	882.67	1060.35	1144.91	633.99	482.86	542.04	314.76	262.92	279.06	469.98	335.18	324.87	483.33	338.71	401
CiPaw.01G066100.v1.1	264.31	248.85	263.04	836.18	754.96	755.04	852.53	868.42	993.22	849.69	934.75	983.19	540.47	416.86	493.21	354.7	408.04	463.1	300	254.41	265.61	462.14	552.02	519	477.17	497.01	614.53	459.22	552.85	521.54	402.2	373.17	399.7	407.46	359.29	339.19
CiPaw.15G142500.v1.1	450.09	531.33	422.92	96.06	118.7	79.01	99.97	80.24	82.07	103.25	101.78	112.64	113.07	183.34	138.05	88.48	145.72	130.92	728.67	740	569.87	226.4	197.87	270.59	383.15	382.64	264.53	268.34	329.14	205.49	254.3	163.76	280.14	396.01	228.84	420.99
CiPaw.04G194200.v1.1	557.33	581.53	466.43	1.15	2.25	1.77	15.86	11.86	11.94	8.11	8.7	9.6	33.8	204.81	122.21	307.95	437.3	760.32	322.68	226.33	189.4	70.82	3.68	43.26	77.49	72.6	44.44	72.6	120.48	122.82	496.14	891.89	710.36	1683.74	1702.59	887.57
CiPaw.10G117600.v1.1	43.24	27.89	25.09	1012.89	727.25	980.96	2303.05	1832.97	2181.81	889.54	1179.26	1292.33	84.86	55.44	89.19	95.16	83.66	87.54	30.9	30.33	30.85	192.48	182.62	188.76	322.67	278.7	311.93	273.63	351.09	286.4	25.58	26.44	37.82	44.58	23.67	69.64
CiPaw.03G216600.v1.1	138.53	121.85	131.51	956.7	1182.76	1238.94	807.95	1141.26	941.6	849.31	1079.84	851.92	346.52	361.4	399.19	419.29	291.49	319.32	72.26	63.38	68.55	235.79	240.78	202.17	249.7	215.25	211.55	169.41	141.3	274.37	129.63	76.39	118.22	129.67	129.13	129.77
CiPaw.16G059000.v1.1	410.99	467.97	449.92	10.75	12.21	8.3	6.43	11.46	8.71	22.27	17.35	23.6	258.56	292.29	345.95	247.71	189.36	237.61	176.68	177.5	219.84	56.38	50.92	36.71	49.89	51.09	58.27	119.55	123.95	93.32	257.92	220.01	400.64	155.86	183.65	281.18
CiPaw.14G080800.v1.1	730.84	810.49	800.79	123.6	74.17	130.53	261.48	339.08	278.17	326.38	388.41	464.07	512.1	255.73	463.34	243.84	181.11	171.1	78.07	91.07	79.56	154.64	82.24	76.43	345.87	419.63	475.45	372.29	340.85	249.36	360.85	394.54	387.3	274.91	212.17	291.19
CiPaw.09G113700.v1.1	506.54	549.48	588.92	14.41	19.71	12.28	43.94	65.02	42.63	82.98	73.6	88.59	285.81	206.45	260.45	254.99	252.55	215.78	40.1	82.23	98.89	61.26	48.49	38.69	140.34	163.89	237.07	297.03	271.38	173.04	300.61	379.82	451.54	201.46	270.05	333.92
CiPaw.02G150500.v1.1	1207.61	1232.52	1382.65	1334.44	1591.14	1539.18	1262.18	1328.61	1245.92	1070.4	1006.61	1057.06	1112.45	1440.16	1204.85	1116.64	1156.14	1127.38	1448.16	1354.73	1322.55	1293.9	1400.72	1436.83	1196.94	1327.07	1252.12	1043.34	1081.79	1128.49	1269.8	1477.82	1135.42	1333.97	1314.71	1183.47
CiPaw.11G077100.v1.1	332.92	322.29	310.19	596.94	622.75	671.5	388.04	529.73	458.95	630.29	691.94	770.25	793.48	959.15	833.4	707.24	933.43	985.21	492.86	484.64	533.6	472.24	560.53	532.48	648.44	746.02	511.67	630.34	549.32	637.4	742.76	641.69	767.34	488.74	504.28	591.56
CiPaw.08G160400.v1.1	379.56	384.25	349.59	639.67	618.47	598.73	587.44	591.94	572.67	642.64	660.15	645.96	443.86	371.34	422.44	291.13	346.88	351.71	377.5	361.05	346.09	663.74	738	696.97	535.86	544.19	558.82	345.59	390.05	422.45	296.07	313.91	294.01	321.03	346.33	280.56
CiPaw.11G184100.v1.1	721.23	818.59	836.89	12.57	17.37	11.86	29.43	62.68	37.86	97.48	88.56	115.23	316.99	259.86	351.58	236.04	213.95	242.14	96.21	102.76	82.78	58.57	34.3	34.13	196.62	192.88	288.44	265.87	212.73	150.19	325.92	284.96	345.86	236.9	232.99	287.33
CiPaw.11G008300.v1.1	42.42	35.51	46.4	348.88	283.77	324.13	445.5	509.65	541.8	293.52	341.52	401.24	164.62	119.14	140.39	122.99	109.49	99.82	77.12	63.01	62.31	228.38	198.56	193.39	340.94	267.84	321.81	307.87	308.19	301.18	118.37	97.95	126.54	77.2	93.29	128.4
CiPaw.01G048100.v1.1	218.65	204.47	179.9	48.88	37.07	38.64	56.2	54.96	62.4	96.54	103.29	100.93	266.95	319.92	295.3	354.17	352.7	390.85	174.91	151.99	159.77	52.76	38.01	57.99	167.14	143.55	149.67	171.91	207.09	166.42	287.22	264.97	404.87	309.33	292.45	411.01
CiPaw.11G032800.v1.1	592.99	633.1	735.81	1152.81	1076.01	1022.43	918.05	862.19	846.68	912.56	829.2	854.59	748.26	855.39	744.29	677.32	810.6	805.87	789.33	750.97	764.94	1255.6	1324.92	1244.73	965.02	1120.66	1015.42	964.29	812.15	988.7	910.55	1036.3	805.25	1188.84	979.49	839.32
CiPaw.09G190600.v1.1	430.15	426.49	377.45	392.5	396.92	292.46	384.56	262.49	300.38	183.85	217.11	123.67	412.13	510.14	436.56	618.76	538.43	529.01	892.74	1072.82	1073.48	342.53	532.23	549.23	420.51	463.24	313.37	150.95	141.46	138.85	342.71	413.96	277.45	402.58	236.57	297.82
CiPaw.09G029000.v1.1	240.88	232.12	220.96	419.49	462.03	409.27	662.59	562.77	620.58	556.04	496.25	561.49	519.22	356.52	417.32	239.15	244.66	290.91	312.31	336.63	309.86	378.27	477.29	518.53	441.61	462.89	415.28	346.44	296.53	278.98	249.4	280.34	271.92	186.75	162.19	149.65
CiPaw.01G214000.v1.1	262.18	266.28	259.82	223.92	233.5	160.25	877.99	450.78	680.63	388.91	355.82	477.28	366.67	341.61	299.61	292.59	283.49	329.08	587.11	688.48	527.08	323.69	426.73	540.99	587.17	788.79	520.92	397.12	402.2	266.85	216.22	356.46	206.62	115.94	128.9	119.02
CiPaw.09G091200.v1.1	271.68	196.04	203.29	158.61	220.14	112.1	275.59	265.98	341.14	279.66	404.49	288.08	280.62	345.52	311.14	542.33	275.31	452.16	142.61	129.96	127.85	619.92	705.46	816.84	375.72	583.22	528.28	326.31	377.08	303.46	166.11	160.75	172.72	129.04	102.97	98.64
CiPaw.02G132000.v1.1	805.88	819.09	844.33	699.82	754.85	675.81	599.37	609.77	650.23	803.95	798.66	715.27	725.97	774.22	808.65	1207.57	1087.79	1023.62	1013.26	984.5	1111.73	1495	1388.77	1228.89	844.74	898.49	763.63	905.6	879.9	1014.89	695.76	837.86	743.38	804.45	974.49	909.88
CiPaw.12G065800.v1.1	31.13	30.69	29.19	187.26	127.43	185.22	420.55	326.91	530.86	439.81	509.91	558.37	69.23	133.56	87.02	160.85	177.37	157.91	64.11	122.3	214.34	382.96	290.82	246.81	320.22	285.26	317.36	386.3	365.36	360.54	75.54	87.12	84.22	131.26	109.37	164.67
CiPaw.14G133500.v1.1	71.01	76.5	75.68	483.1	454.47	522.99	142.98	149.42	128.92	166.12	158.75	125.67	406.3	378.53	399.3	615.14	454.1	323.33	220.78	363.59	528.96	230.96	317.42	226.23	131.81	111.83	110.25	160.16	100.15	99.88	240.43	354.24	253.52	226.23	202.1	265.49
CiPaw.03G022200.v1.1	313.67	287.56	305.5	61.28	92.34	130.31	86.04	75.36	98.99	26.55	24.27	31.49	231.41	545.84	236.65	411.74	200.33	245.07	773.61	1086.24	1101.57	459.25	379.5	401.67	179.21	286.8	215.7	197.09	421.21	414.69	209.66	157.75	209.74	125.2	126.23	220.9
CiPaw.11G103700.v1.1	853.85	909.57	1056.99	605.03	736.19	621.23	389.84	390.66	385.76	317.92	338.08	349.26	467.22	681.58	452.93	512.82	477.66	565.02	1208.44	1062.07	1017.22	698.22	537.05	501.57	461.9	612.93	519.96	498.58	627.27	451.98	440.34	442.39	487.23	500.51	439.86	462.54
CiPaw.04G137000.v1.1	169.76	139.38	163.47	311.62	267.56	308.98	406.63	558.42	503.83	488.86	457.38	453.74	315.85	221.81	279.1	186.79	168.57	172.43	105.61	94.97	88.45	240.31	224.44	257.82	419.19	434.33	463.39	585.37	550.79	553.49	224.06	93.72	250.76	101.38	155.44	242.23
CiPaw.03G090400.v1.1	638.02	727.64	719.71	44.88	51.24	36.98	96.82	99.12	85.55	155.9	158.02	177.17	464.06	401.89	411.04	357.25	346.67	414.49	133.76	145.64	182.4	102.74	100.09	70.84	155.82	163.66	186.6	255.51	250.31	165.33	387.4	513.14	559.98	284.01	353.16	549.4
CiPaw.05G236200.v1.1	588.08	490.43	539.96	654.36	782.4	696.71	416.16	694.1	572.75	738.1	803.66	641.34	981.84	914.07	1133.24	992.67	658.11	683.08	354.14	370.76	385.12	508.12	644.72	634.96	546.21	509.81	521.74	469.94	543.93	543.92	636.72	464.57	637.67	452.7	452	437.88
CiPaw.07G190700.v1.1	159.34	213.38	175.55	11.79	18.4	5.94	27.96	17.64	22.23	40.03	43.79	53.07	308.27	351.79	305.2	271.3	144.67	253.53	21.3	21.36	22.28	23.36	17.28	18.47	108.44	134.13	133.81	161.91	123.64	85.24	341.43	370.73	392.88	181.35	160.7	243.93
CiPaw.10G105700.v1.1	7.24	8.62	7.81	354.86	240.09	251.4	788.44	499.81	725.62	473.15	565.95	708.05	157.8	81.43	69.19	40.29	100.59	67.3	29.5	27.75	33.47	140.62	106.15	118.99	339.91	335.96	319.84	380.34	433.97	359.81	94.4	142.52	125.93	58.51	74.66	92.82
CiPaw.07G129800.v1.1	692.41	877.62	869.36	52.03	33.49	53.66	66.67	172.94	75.17	221.71	281.26	281.93	925.04	287.31	804.5	159.49	177.92	198.45	5.24	5.19	8.67	28.12	29.72	15.55	94.73	106.68	142.39	209.42	126.61	88.99	250.42	327.14	246	197.48	129.12	193.88
CiPaw.06G141900.v1.1	322.51	374.02	307.27	40.12	51.46	38.72	135.68	88.89	88.4	96.09	95.42	99.25	231.01	363.39	271.52	297.16	350.65	335.22	500.24	524.57	558.77	307.24	178.33	157.33	162.52	135.1	195.24	201.18	359.6	268.02	383.71	301.29	482.69	253.63	318.15	445.37
CiPaw.04G103300.v1.1	742.74	683.58	662.37	424.3	474.92	447.32	522.45	557.64	495.98	532.78	504.11	476.36	744.67	907.39	792.73	1023.78	818.53	814.5	884.71	874.13	850.23	777.03	740.97	784.29	729.47	697.88	702.36	773.36	809.99	703.17	965.45	696.46	897.52	848.23	1050.15	928.93
CiPaw.09G008800.v1.1	325.25	295.96	313.23	318.03	401.48	287.17	236.64	210.67	244.66	110.54	77.74	92.33	158.46	468.53	224.92	642.28	712.8	441.93	139.04	187.72	219.94	333.35	259.03	379.92	104.62	133.66	80.42	82.42	36.33	172.08	117.93	338.3	95.17	452.73	546.62	146.36
CiPaw.11G060400.v1.1	293.03	312.88	294.63	525.1	483.34	426.48	577.25	431.32	543.98	586.37	809.48	635.09	396.49	432.59	336.69	281.46	389.28	343.27	398.55	391.11	387.92	707.38	703.87	608.72	620.79	691.55	630.99	731.05	752.91	729.67	499.16	588.81	481.77	411.61	406.9	405.17
CiPaw.05G090500.v1.1	1.98	2.73	3.52	854.54	668.67	1161.18	548.16	618.08	425.43	622.7	735.91	699.98	242.51	75.44	151.46	96.49	47.57	71.8	1.59	2.42	5.54	215.47	377.93	296.79	138.61	69.41	86.74	139.69	72.83	154.48	37.31	129.15	36.73	29.68	50.26	16.6
CiPaw.01G028200.v1.1	3.21	1.2	0.64	546.58	376.66	567.44	1201.3	768.15	1412.67	692.98	1024.67	938.24	26.3	14.22	17.04	14.85	41.61	26.91	4.89	6.13	4.33	273.13	259.47	273.94	231.22	230.36	239.12	169.88	249.91	267.21	10.14	10.99	7.62	12.56	13.17	27.56
CiPaw.02G107700.v1.1	277.43	294.13	283.68	575.72	648.5	577.36	603.27	566.74	572.76	526.89	554.88	529.52	459.71	420.45	446.1	256.82	353.81	317.64	322.43	321.36	309.39	578.77	697.95	624.4	545.98	521.6	468.59	383.18	378.45	392.73	329.9	391.08	321.99	382.86	419.78	329.22
CiPaw.16G017900.v1.1	7.92	8.42	5.42	262.36	301.49	226.14	435.6	260.72	328.99	216.06	264.12	326.51	107.99	122.95	87.3	88.41	121.44	74.86	88.78	127.57	170.32	328.85	233.03	248.13	336.87	356.04	401.77	466.06	393.04	287.86	122.32	133.17	110.91	64.86	61.71	106.42
CiPaw.09G143300.v1.1	547.59	540.09	563.81	58.02	84.61	29.39	25.4	32.86	30.87	31.03	27.91	41.12	89.29	190.21	103.01	322.6	276.01	254.28	609.91	556.75	540.68	130.1	103.86	108.5	150.43	240.21	223.39	200.08	311.87	223.24	228.55	158.83	209.3	286.11	299.84	299.68
CiPaw.03G262000.v1.1	274.44	195.05	214.28	79.83	73.6	73.23	122.83	167.8	176.52	87.87	106.68	94.91	185.95	368.21	259.94	342.25	369.55	341.89	235.14	204.07	201.77	164.36	115.56	144.15	481.86	285.27	273.9	232.89	372.61	425.62	428.8	407.43	420.75	195.97	438.8	284.45
CiPaw.13G045700.v1.1	349.32	297.53	344.42	70.79	84.52	65.42	66.23	104.44	103.2	168.63	172.48	168.69	112.69	99.07	116.73	163.12	131.71	96.35	284.73	227.71	204.32	244.63	221.31	234.86	602.57	532.27	561.59	598.73	528.08	759.09	403.74	122.08	397.15	124.78	231.43	290.37
CiPaw.10G149400.v1.1	30.45	26.29	36.33	496.6	452.3	514.89	548.42	538.71	573.68	312.33	417.59	394.31	235.75	157.39	278.26	78.15	67.21	110.64	49.41	45.71	42.21	89	72.81	56.26	171.75	178.3	233.42	229.87	239.82	191.73	113.94	70.66	190.13	53.96	69.7	64.59
CiPaw.01G116100.v1.1	220.31	224.59	250.03	72.01	44.02	75.66	97.18	177.17	94.23	221.97	251.97	233.63	707.26	397.01	650.23	373.35	361.33	267.95	12.23	16.4	18.76	44.07	37.54	22.27	123.27	168.84	193.53	167.45	115.55	90.61	337.55	391.38	259.39	302.48	201.87	250.9
CiPaw.13G093300.v1.1	435.87	488.61	366.74	700.43	841.04	703.82	309.41	296.13	241.54	229.56	200.99	202.52	162.7	156.22	153.95	79.8	158.12	144.55	663.85	573.59	450.88	212.19	377.27	466.97	302.02	274.1	293.96	196.36	214.23	169.24	211.64	158.85	237.28	557.88	315.02	365.6
CiPaw.15G067900.v1.1	21.04	18.47	29.28	370.85	400.13	453.06	406.09	558.27	488.76	460.91	414.3	416.7	222.16	184.1	221.26	140.05	177.63	154.73	63.52	57.28	55.2	243.09	264.54	249.03	336.13	305.64	370.74	336.93	277.47	339.86	197.03	151.71	188.45	196.76	172.26	179.24
CiPaw.01G085400.v1.1	1054.68	1114.73	1038.78	2.2	3.94	2.15	4.85	5.33	7.52	13.32	11.97	25.11	66.84	232.9	84.82	345.25	555.52	491.85	225.8	191.62	221.45	42	23.34	26.48	139.46	205.24	140.73	83.48	119.78	114.13	223.64	94.18	312.45	148.63	265.05	190.96
CiPaw.07G123700.v1.1	303.51	244.01	213.72	148.99	177.21	146.85	110.39	63.6	84.3	83.63	75.65	68.4	94.29	143.87	125.66	209.34	301.08	274.57	315.95	309.95	316.8	315.64	244.11	333.9	185.43	136.28	156.37	170.98	158.7	165.02	432.09	659.47	357.24	996.96	537.55	570.62
CiPaw.02G102300.v1.1	215.36	266.52	261.39	84.24	69.26	137.32	48.44	65.13	30.91	101.39	137.37	128.92	532.16	455.57	651.76	426.86	554.26	406.95	14.86	30.93	41.37	36.01	26.62	22.2	102.09	84.85	131.11	159.91	82.91	94.48	359.46	496.57	425.47	400.04	393.48	485.65
CiPaw.08G137000.v1.1	565.66	533.96	469.01	188.94	253.39	244.95	181.04	190.61	177.92	156.79	156.27	155.13	304.02	500.24	314.53	316.88	404.66	367.38	674.16	700.36	685.54	474.92	423.68	457.26	431.62	555.48	453.85	424.81	536.21	513.64	442.9	432.85	504.46	477.02	409.92	502.62
CiPaw.01G078300.v1.1	310.84	285.91	310.29	75.73	116.57	51.87	52.71	100.58	92.92	78.96	61.36	76.35	72.16	226.32	122.22	64.51	152.56	121.42	237.41	207.74	217.36	539.25	465.65	562.99	527.23	486.56	539.19	292.37	369.23	314.36	253.36	132.24	200.27	243.77	312.56	245.61
CiPaw.10G151800.v1.1	27.37	49	40.02	258.79	248.41	326.05	247.58	253.41	161.25	356.32	420.62	424.4	622.88	394.54	609.16	429.73	173.82	192.38	1.66	1.66	2.87	145.1	200.87	86.7	127.35	130.83	114.69	194.79	125.48	104.71	351.38	435.68	308.04	176.66	107.94	76.68
CiPaw.03G150800.v1.1	584.79	508.1	617.71	9.25	15.5	6.71	34.89	43.67	47.23	65.09	86.61	59.02	121.24	285.19	165.56	347.77	287.19	319.1	495.37	414.8	442.19	142.2	123.78	79.93	191.82	249.57	248.8	142.13	255.33	178.06	128.68	57.57	163.12	146.19	171.71	191.23
CiPaw.04G117100.v1.1	794.01	805.65	928.92	520.04	499.1	527.06	523.33	476.55	515.7	418.42	399.44	461.71	622.02	792.63	630.68	720.46	760.21	741.98	888.06	855.3	933.35	584.36	629.01	556.01	586.82	674.09	568.19	616.98	644.38	641.87	717.55	718.88	718.17	602.32	734.87	702.19
CiPaw.05G174800.v1.1	140.73	120.67	141.63	327.27	216.48	248.27	1543.79	655.67	1048.97	325.28	253.98	304.32	149.58	90.68	81.09	115.52	99.93	129.1	311.16	451.95	441.21	215.46	281.65	376.46	265.64	400.6	283.81	194.95	196.51	150.93	107.7	48.55	75.54	15.64	21.29	18.97
CiPaw.06G043000.v1.1	360.61	389.41	339.57	919.74	839.11	782.89	743.53	679.2	672.1	674.05	696.33	677	510.13	457.31	468.32	360.03	453.73	389.6	377.15	344.61	336.12	785.42	866.05	705.58	562.12	544.3	549.84	465.96	427.26	469.95	411.16	429.15	367.36	478.06	516.93	419.74
CiPaw.12G077900.v1.1	32.77	55.96	40.24	161.49	143.81	171.83	757.56	488.05	869.92	425.53	411.25	580.07	264.27	113.81	266.14	72.53	106.05	70.62	3.64	2.43	5.16	155.66	128.76	95.2	268.44	377.77	490.28	351.97	246.06	225.63	226.77	228.55	204.09	89.08	77.83	197.99
CiPaw.12G120700.v1.1	120.54	91.83	130.36	682.09	486.2	643.9	880.19	673.01	767.12	630.44	677.55	811.19	223.39	213.04	191.16	190.19	97.64	133.37	100.51	101.07	102.36	171.26	125.52	122.23	280.12	255.92	303.4	376.39	316.91	517	171.32	252.02	178.04	47.37	69.15	52.76
CiPaw.11G149600.v1.1	255.6	255.62	265.14	459.51	514.03	438.75	669.65	488.58	597.66	559.01	519.11	576.17	524.12	351.7	403.55	317.45	320.25	392.86	539.38	546.45	518.16	463.75	568.93	633.92	543.05	611.43	562.3	517.29	436.54	376	326.98	359.48	323.72	285.14	241.47	214.06
CiPaw.02G197000.v1.1	23.22	22.1	15.17	152.46	112.27	115.75	347.84	277.09	347.13	321.36	308.53	417.68	402.52	371.18	410.34	241.23	247.04	315.43	100.66	125.65	143.4	207.57	171.31	169.59	521.66	340.44	371.3	478.74	298.86	354.62	456.75	334.37	527.3	354.66	196.53	383.63
CiPaw.05G221800.v1.1	40.97	35.87	39.63	328.51	284.3	455.69	259.12	320.49	203.44	294.82	243.25	237.23	330.41	359.61	335.65	312.77	393.95	381.56	30.2	21.78	32.46	67.01	53.75	78.34	93.29	90.9	80.65	116.21	67.08	137.75	138.62	182.51	153.32	128.6	157.94	141.85
CiPaw.01G116600.v1.1	263.62	196.44	186.01	417.17	474.25	564.05	392.26	464.14	418.91	634.17	601.48	601.76	381.26	326.93	369.26	288.51	431.2	403.74	317.42	307.22	334.66	529.22	518.73	547.73	394.47	325.23	393.77	369.34	338.54	474.06	630.85	912.51	533.14	984.54	640.56	694.17
CiPaw.01G143400.v1.1	46.91	32.7	50.07	10.16	10.38	9.85	54.59	74.33	70.38	68.64	54.69	76.34	116.04	242.73	194.06	279.75	276.04	276.41	99.75	135.88	162.99	82.7	54.11	47.83	239.05	221.57	277.22	347.16	290.9	676.07	373.18	257.69	365.93	272.1	537.23	248.69
CiPaw.09G168800.v1.1	5.81	7.47	4.97	548.48	382.03	504.53	1136.43	678.94	1138.91	646.24	688.99	852.63	80.02	37.6	33.24	74.74	99.9	91.57	28.01	44.89	64.53	173.77	178.84	161.45	202.24	270.49	332.67	301.14	358.24	257.72	46.64	64.26	55.87	72.49	68.94	81.77
CiPaw.04G061100.v1.1	318.97	296.7	250.03	112.56	102.79	62.73	103.22	55.12	105.63	178.69	361.51	242.21	148.23	317.15	229.24	66.38	121.73	108.06	347.63	342.58	375.91	736.72	652.64	486.78	399.22	581.44	313.15	366.98	362.57	408.79	284.16	148.23	244.33	311.33	323.06	485.14
CiPaw.06G079600.v1.1	269.91	295.46	251.3	7.61	16.2	3.84	26.56	12.27	28.51	21.36	39.08	44.77	43.8	223.22	99.25	39.09	122.43	100.07	256.12	234.19	240.98	369.23	340.64	351.92	382.44	282.32	277.32	211.69	297.55	215.31	220.82	160.95	237.07	282.61	322.31	308.04
CiPaw.13G041100.v1.1	88.85	89.97	95.34	424.62	339.5	314.09	589.06	418.69	542.57	335.85	359.9	422.16	254.83	234.22	211.61	149.29	183.99	207.39	178.03	208.66	163.88	327.71	300.21	305.2	386.96	431.24	418.73	434.98	410.85	410.17	249.03	236.88	260.99	144.53	190.53	189.93
CiPaw.15G080800.v1.1	625.92	531.52	547.18	257.78	299.9	231.35	286.81	173.43	262	221.8	216.08	217.37	180.62	253.74	207.8	277.91	305.63	390.4	416.08	426.35	421.53	501.3	715.38	444.45	294.27	367.64	317.32	297.49	263.38	298.27	571.05	960.74	511.36	1053.3	516.9	497.87
CiPaw.15G106900.v1.1	290.24	397.71	409.58	869.94	722.58	853.29	574.63	553.94	570.31	561.68	538.14	585.86	260.74	294.79	330.54	311.35	373.93	270.19	412.35	336.77	383.09	359.91	367.51	460.59	442.55	600.54	300.28	326.11	308.36	327.04	412.4	472.74	610.56	227.74	370.23	696.56
CiPaw.08G024100.v1.1	123.24	128.93	126.05	607.2	564.1	552.84	400.82	395.33	409.87	400.56	408.17	424.14	300.54	312.85	270.05	153.92	231.89	222.2	114.22	119.07	120.31	431.6	407.47	342.31	404.3	432.77	466.03	548.87	463.22	496.48	299.53	344.93	300.15	265.2	234.85	230.34
CiPaw.01G156200.v1.1	329.23	357.77	360.02	65.13	64.93	68.03	60.64	80.88	71.62	132.87	126.2	153.27	263.24	362.19	321.71	284.45	358.19	300.88	178.68	164.96	199.79	107.25	109.19	96.44	176.05	204.3	201.32	252.21	234.16	237.96	329.7	385.54	348.28	314.49	295.1	303.26
CiPaw.03G220100.v1.1	307.82	355.6	341.72	711.2	717.72	656.46	597.28	565.98	562.71	600.5	587.58	577.66	494.58	468.19	462.14	360.62	425.07	397.77	357.42	336.9	331.96	611.26	687.21	629.38	529.15	593.27	522.26	489.39	438.53	462.61	395.58	399.67	369.1	612.66	510.1	441.09
CiPaw.07G042200.v1.1	317.29	316.34	298.1	394.41	497.54	423.56	802.92	815.62	794.96	928.53	806.25	805.52	745.6	702.94	793.27	636.96	665.17	721.52	556.4	569.95	537.86	631.76	712.23	768.81	898.74	890.88	1004.97	996.13	817.29	840.87	801.32	692.05	808.69	880.67	632.54	676.05
CiPaw.07G166900.v1.1	429.81	380.28	349.6	13.13	16.37	8.43	26.82	29.77	43.42	123.02	144.49	156.85	121.44	197.05	159.44	77.96	165.79	151.02	390.16	339.72	317.92	222.66	248.68	170.89	223.53	286.87	277.67	318	381.07	363.72	211.41	86.07	258.44	244.99	234.39	346.99
CiPaw.05G127600.v1.1	356.85	358.15	382.21	67.98	82.05	78.27	96.23	160.21	120.07	147.74	118.74	151.05	335.93	332.33	378.63	373.17	506.92	273.63	142.39	167.02	154.62	194.9	208.39	198.82	265.34	282.65	358.58	251.83	222.51	214.66	389.2	294.71	339.61	368.68	243.33	354.25
CiPaw.05G151600.v1.1	982.5	931.74	1018.96	31.76	24.77	26.53	38.9	78.73	48.53	130.56	150.13	141.42	298.95	271.7	296.07	465.24	378.31	306.38	118.51	172.8	213.31	135.93	91.55	49.06	181.87	247.29	294.86	185.24	188.57	132.05	335.11	462.74	351.43	299.02	222.16	294.5
CiPaw.11G048200.v1.1	1134.51	1057.69	1068.83	883.41	854.2	951.84	890.78	1095.17	1048.63	941.39	999.31	971.39	902.4	1000.18	943.66	1231.01	984.91	1098.31	1224.67	1227.23	1251.87	1273.8	1280.57	1148.75	1093.9	1024.11	1090.61	1006.8	993.01	1013.59	781.63	811.31	793.54	723.84	771.33	759.93
CiPaw.03G096200.v1.1	320.3	352.63	324.18	819.48	810.16	771.49	622.04	624.99	609.82	593.47	595.4	581.99	485.59	449.74	469.38	376.47	426.98	385.12	402.66	366.76	388.27	680.33	711.93	650.53	559.54	573.61	529.24	510.73	473.4	472.74	399.38	399.75	397.99	495.98	531.3	435.55
CiPaw.12G120100.v1.1	438.35	390.71	359.62	153.15	160.98	181.58	83.19	99.83	110.18	245.62	248.12	278.75	356.43	416.03	514.07	335.82	247.6	352.8	99.22	105.27	142.76	260.6	190.62	189.9	260.43	333.25	362.86	247.62	214.79	181.6	419.22	311.13	448.02	438.38	276.82	367.99
CiPaw.13G118900.v1.1	2003.72	1995.33	2004.82	590.88	638.74	714.97	792.37	846.28	894.41	890.73	1018.85	956.27	1062.97	953.41	1024.62	1147.42	991.83	1055.63	928.3	910.48	1007.89	824.59	804.22	700.42	956.55	937.83	1139.08	977.23	917.58	800.42	875.85	806.87	1002.27	911.57	752.45	877.14
CiPaw.06G128300.v1.1	345.46	270.15	311.48	124.64	139.99	115.76	221.57	302.24	303.68	347.68	305.65	345.92	352.61	383.74	367.92	412.32	356.16	365.69	177.59	166.81	177.27	230.1	195.71	246.79	489.94	520.96	555.95	809.78	891.78	726.91	393.25	173.19	469.02	203.99	299.2	424.3
CiPaw.07G067100.v1.1	321.86	357.12	336.92	135.56	112.74	155.7	128.39	140.21	117.55	131.75	137.83	134.15	191.3	240.51	230.55	232.92	268.12	190.93	335.09	317.7	339.11	123.15	109.07	119.07	356.3	208.07	212.19	186.15	270.61	316.2	353.66	365.32	275.44	412.8	503.32	584.68
CiPaw.14G049400.v1.1	674.24	697.03	731.59	921.85	998.92	921.99	966.97	986.57	964.67	762.7	698.64	707.73	731.43	828.73	756.51	787.39	800.34	807.05	1026.6	1069.53	1031.68	916.45	979.2	971.48	958.93	1115.83	1067.37	914.74	797.49	750.43	762.71	768.89	743.45	1104.14	821.39	785.2
CiPaw.15G156500.v1.1	564.17	506.49	548.32	38.16	31.94	28.03	49.06	55.41	61.53	83.78	103.02	90.73	113.5	224.34	125.49	202.02	190.29	199.93	417.05	394.69	421.55	207.6	181.04	146.62	250.49	328.2	281.15	279.3	321.52	325.31	231.96	129.61	207.52	173.07	226.76	238.67
CiPaw.12G048700.v1.1	697.61	707.7	637.94	79.61	68.44	74.15	81.55	66.58	91.03	92.88	122.27	108.99	137.45	236.51	226.24	1021.69	690.17	710.91	187.19	290.41	367.33	397.77	159.44	117.69	94.17	166.79	103.23	134.53	89.45	121.96	335.33	597.82	346.37	287.77	255.39	484.77
CiPaw.03G030300.v1.1	696.45	762.48	692.59	23.86	34.45	39.44	25.35	53.55	31.84	66.66	113.63	89.93	291.7	262.68	373.43	289.28	191.72	262.73	211.93	172.9	200.5	76.69	83.12	64.3	100.74	95	108.34	191.72	177.38	107.82	243.56	276.05	416.6	126.26	222.57	284.68
CiPaw.11G063500.v1.1	447.5	451.79	428.25	191.21	201.58	195.78	190.21	177.18	189.33	189.35	179.52	175.61	314.42	418.91	348.93	438.63	432.53	391.62	378.28	398.22	405.79	235.82	242.8	234.52	249.5	259.46	253.62	281.01	264.86	258.27	366.62	385.85	390.44	425.48	356.26	381.63
CiPaw.15G173600.v1.1	91.83	97.52	99.45	329.7	330.15	294.52	718.21	699.85	715.93	569.63	654.43	655.04	449.88	272.73	399.33	248.19	237.9	284.26	166.29	178.12	145.67	287.75	318.26	399.11	510.38	352.33	364.94	403.03	391.11	363.05	292.08	277.5	278.44	124.8	151.12	115.97
CiPaw.15G089300.v1.1	369.61	497.28	426.84	33.36	30.4	22.49	98.36	66.38	80.53	81.03	63.42	92.1	372.47	256.36	276.24	258.69	191.16	288.63	45.95	51.73	55.26	50.67	31.35	33.07	139.09	165.3	181.26	244.07	186.21	116.27	254.28	334.48	336.65	123.91	146.81	232.28
CiPaw.12G102900.v1.1	358.77	443.66	413.54	81.21	81.08	96.3	163.08	150.01	139.22	220.37	266.34	287.85	583.79	372.53	552.01	418.2	351.17	319.37	92.3	102.67	138.6	154.78	131.82	99.13	180.22	222.9	244.1	251.2	171.39	165.16	322.17	538.71	326.72	253.01	214.25	332.37
CiPaw.05G016600.v1.1	214.63	254.35	252.25	13.38	13.72	18.03	30.16	56.25	22.94	126.7	107.02	117.13	314.67	182.03	316.29	206	172.61	152.05	5.22	12.61	11.81	21.02	23.06	16.04	84.1	100.95	149.35	217.59	111.36	96.18	220.68	340.92	191.23	299.62	136.46	159.38
CiPaw.14G091400.v1.1	185.87	280.12	240.09	25.38	27.52	25.58	51.31	72.27	43.46	105.4	76.73	112.74	247.99	141.23	211.81	118.25	92.95	86.81	29.44	35.38	34.64	61.68	80.16	42.88	223.77	301.32	308.76	352.42	220.62	174.94	256.86	285.36	270.29	237.48	231.12	365.86
CiPaw.14G038900.v1.1	284.63	328.79	324.05	84.37	92.17	69.44	80.86	112.65	83.6	134.04	106.34	142	410.31	376.05	354.8	273.82	398.82	315.9	153.49	149.19	172.44	81	92.79	85.49	179.93	217.09	234.94	201.96	154.47	136.25	290.2	310.78	355.92	236.88	179.57	361.83
CiPaw.13G044300.v1.1	796.19	768.46	743.35	647.11	696.49	619.05	779.05	706.09	736.9	675.99	685.23	719.08	847.39	883.76	749.56	1052.33	835.34	915.39	1376.75	1537.19	1473.93	697.29	902.21	898.42	752.65	933.04	739.32	722.15	812.52	599.5	602.6	735.67	551.84	460.79	381.06	364.31
CiPaw.05G263500.v1.1	563.04	560.78	569.26	19.02	30.01	27.99	51.81	65.72	53.05	81.53	72.55	99.55	237.8	250.91	205.53	189.06	208.26	191.19	146.2	189.82	190.79	76.57	56.9	50.98	134.62	182.33	235.81	181.29	121.88	126.87	306.74	384.86	251.64	472.42	243.33	287.39
CiPaw.13G120900.v1.1	216.36	197.57	227.81	636.12	630.44	721.51	416.29	562.56	455.22	578.7	616.18	524.16	369.87	341.64	371.1	720.46	504.16	503.78	414.87	418.28	514.07	559.84	508.91	469.08	293.11	326.79	312.33	334.02	269.97	356.42	322.23	358.95	280.35	411.37	395.08	378.84
CiPaw.15G142300.v1.1	355.2	394.16	357.03	65.59	73.03	90.21	53.35	67.57	45.55	69.71	80.03	85.43	254.32	257.94	289.75	320.18	423.63	246.77	120.68	198	169.87	124.28	114.38	74.44	156.05	160.58	191.94	164.14	141.98	112.32	336.71	352.84	418.23	350.62	279.16	451.37
CiPaw.13G085200.v1.1	104.66	88.69	96.16	210.39	202.32	156.33	972.69	379.79	595.2	171.51	155.19	178.22	312.09	360.56	310.72	299.2	182.65	228.13	493.19	451.04	300.29	264.29	358.03	550.47	297.76	426.11	324.48	254.36	250.56	121.05	289.32	321.49	254.18	60.51	100.77	81.35
CiPaw.09G220500.v1.1	587.09	620.03	523.85	12.56	29.32	7.95	13.02	7.44	16.06	19.33	17.67	48.04	75.26	274.7	98.84	118.61	170.48	127.55	267.08	308.38	318.61	47.9	39.8	44.53	190.01	259.52	166.54	188.5	327.99	140.7	194.92	115.16	185.94	136.57	134.16	176.18
CiPaw.14G030300.v1.1	231.05	232.21	258.88	127.16	122.02	129.73	141.22	137.38	136.85	131.67	153.83	146.41	146.53	283.48	214.67	171.7	269.83	271.02	467.21	450.07	487.5	275.56	241.61	208.59	285.55	308.62	253	234.24	310.65	334.67	370.43	566.84	367.96	458.49	390.04	331.16
CiPaw.14G085900.v1.1	211.23	212.97	204.06	393.52	376.67	325.77	507.75	501.39	518.49	496.96	507.2	531.33	716.64	426.7	541.01	334.45	332.5	396.67	381.21	396.62	385.33	495.12	563.37	604.37	613.3	634.55	550.55	525.84	533.64	426.92	390.13	400.3	425.12	157.52	182.51	170.62
CiPaw.11G138900.v1.1	43.5	63.65	45.26	892.11	720.36	1001.03	510.93	424.2	440.55	408.88	640.96	525.53	236.51	138.6	142.69	127.06	78.8	130.01	42.34	47.79	49.64	552.28	828.31	557.5	156.56	140.31	120.11	191.89	76.74	159.26	52.39	94.54	42.58	59.75	109.81	40.9
CiPaw.03G026900.v1.1	419.08	541.54	377.88	531.81	720.74	605.47	517.2	414.98	368.18	275.5	349.62	179.32	143.67	115.69	179.54	37.55	139.77	140.58	460.39	442.07	329.52	182.82	259.37	334.93	476.84	372.45	428.21	395.66	283.12	210.11	321.12	308.04	263.75	665.66	283.73	376.48
CiPaw.08G092900.v1.1	256.92	300.43	286.46	672.19	653.65	601.93	539.14	502.23	521.06	522.89	555.22	521.73	408.68	369.86	391.01	307.65	339.39	330.93	301.4	283.25	262.85	652.64	663.92	606.58	511.62	515.06	523.51	430.25	398.19	433.82	338.96	367.07	337.85	470.56	453.39	408.51
CiPaw.06G113800.v1.1	554.99	672.69	682.38	567.86	535.24	590.64	352.82	424.31	388.05	496.35	404.05	462.95	712.77	392.5	676.27	577.92	487.77	446.64	65.88	114.87	147.52	619.53	657.12	531.7	405.97	414.94	563.49	553.29	343.69	457.95	589.78	845.78	609.92	475.4	460.65	556.06
CiPaw.09G204400.v1.1	433.42	453.8	360.63	250.82	264.08	193.91	246.2	221.93	251.25	293.15	326.09	265.98	273	415.52	305.44	349.02	517.04	509.7	739.69	700.38	700.27	281.03	287.05	326.01	515.07	449.57	429.58	351.66	413.42	351.08	470.39	353.19	494.42	719.43	585.31	612.16
CiPaw.02G150000.v1.1	211.26	223.97	205.77	510.06	495.7	512.09	526.77	533.45	525.55	543.37	551.2	554.75	453.67	363.8	421.21	274.42	292.4	287.99	284.68	275.82	258.73	674.43	798.58	671.18	492.1	454.19	505.68	456.35	394.94	480.39	328.76	376.31	335.84	416.04	417.42	373.63
CiPaw.03G168700.v1.1	164.74	161.19	185.72	320.37	355.56	273.48	1135.59	935.42	1455.44	404.99	598.45	675.97	36.3	27.35	25.5	197.63	241.25	263.53	151.01	145.43	199.15	272.47	272.32	256.47	241.25	336.35	329.52	212.48	280.41	285.81	22.96	27.98	41.11	75.67	61.37	123.01
CiPaw.07G092800.v1.1	239.41	252.35	215.65	535.45	579.84	706.47	333.74	339.9	441.73	445.34	369.84	343.87	372.66	217.89	287.37	336.76	233.01	245.99	234.06	198.96	285.22	536.06	498.76	470.59	352.8	374.02	492.42	381.81	453.34	327.52	267.48	186.24	272.7	259.67	261.12	206.6
CiPaw.05G008100.v1.1	127.08	75.8	93.05	119.91	184.36	160.4	84.95	88.19	87.37	143.44	75.35	56.12	118.79	193.67	155.1	358.39	331.79	272.55	128.75	160.89	216.73	467.25	457.72	563.27	166.59	127.39	178.37	210.56	182.94	287.66	317.47	627.4	326.31	728.44	397.68	436.21
CiPaw.02G066000.v1.1	717.78	825.34	766.48	1504.05	1512.01	1382.52	919.18	949.16	910.4	1040.57	1118.01	1090.71	935.24	860.19	845.2	733.79	901.4	816.49	889.64	851.35	824.32	1309.65	1238.25	1153.17	1023.09	972.07	888.09	896.93	954.57	919.43	829	879.35	777.92	999.44	1050.04	980.56
CiPaw.03G148500.v1.1	292.63	319.43	319.6	308	360.42	309.36	441.86	436.41	454.77	480.65	394.04	457.36	495.75	544.66	510.12	309.61	357.61	399.33	500.99	432.26	361.39	487.05	569.68	676.99	676.66	901.39	806.04	715.93	566.02	510.8	542.1	529.8	488.45	372.03	241.29	269.15
CiPaw.01G065000.v1.1	477.52	403.49	396.85	89.35	111.53	44.45	173.23	140.93	184.74	324.59	491.76	337	160.05	369.55	262.96	221.53	218.21	231.35	355.13	285.22	248.25	173.08	199.6	150.4	293.43	410.12	321.5	420.79	456.93	462.5	390.1	226.41	321.29	345.62	398.26	318.55
CiPaw.11G177900.v1.1	93.64	101.47	71.96	294.23	328.04	316.27	948.9	631.72	1061.32	501.79	725.26	722.11	81.13	44.75	50.63	141.41	223.75	153.45	31.38	24.38	23.49	139.63	141.4	162.61	260.13	254.25	204.93	287.49	337.93	224.05	81.79	127.17	78.12	105.73	117.46	164.46
CiPaw.09G057700.v1.1	165.46	168.06	164.47	716.16	709.02	839.69	687.06	564.49	549.76	329.7	393.64	335.51	398.44	252.8	335.98	143.07	149.65	137.45	109.2	96.45	100.29	253	253.04	272.61	295.61	307.63	348.59	191.72	195.21	208.58	207.45	178.21	237.16	125.06	111.93	202.44
CiPaw.13G085500.v1.1	214.83	204	222.27	639.74	486.8	434.58	2004.58	723.47	1330.45	469.91	398.68	582.11	755.32	407.49	460.17	321.79	415.41	516.81	514.74	610.7	490.01	381.44	438.88	662.22	335.59	403.48	388.79	499.73	415.16	246.98	494.91	516.16	322.15	140.12	102.61	145.84
CiPaw.02G022100.v1.1	118.13	162.6	198.05	17.43	23.55	28.94	24.82	51.81	36.27	166.57	233.16	239.04	558.77	184.48	418.63	356.62	142.54	210.08	36.53	30.09	27.88	43.29	37.82	19.36	88.84	79.44	121.67	201.64	119.24	96.94	274.74	283.39	273.28	246.15	133.61	197.3
CiPaw.11G056100.v1.1	192.14	227.37	195.43	90.29	79.07	73.16	63.41	67.36	57.05	137.07	104.73	138.04	299.46	468.35	367.4	252.26	468.05	374.33	189.87	186.6	196.42	104.48	93.32	109.8	171.63	188.59	163.52	182.84	176.57	219.56	451.13	545.61	474.78	515.52	383.75	584.01
CiPaw.07G067900.v1.1	494.1	447.2	477.08	121.6	125.96	130.73	197.17	186.51	249.01	299.71	318.71	372.46	294.94	380.76	279.92	304.07	329.82	347.05	435.37	399.6	348.11	567.3	389.75	373.95	525.11	537.32	720.07	556.01	655.04	515.81	327.77	233.5	345.64	294.1	254.77	325.39
CiPaw.07G115600.v1.1	144.07	174.17	161.4	265.98	281.48	247.66	156.86	157.78	148.76	151.15	135.03	116.56	294.72	294.99	253.5	159.22	275.35	242.21	400.18	354.48	377.02	332.73	370.96	410.06	257.3	289.78	228.11	205.92	193.02	147.95	365.6	309.4	319.54	366.67	357.13	313.16
CiPaw.06G110500.v1.1	259	275.26	264.55	542.6	493.51	474.17	518.84	549.28	560.2	636.46	685.43	644.39	407.32	391.35	388.67	328.47	308.98	320.18	313	303.29	300.6	594.73	679.87	523.86	419.61	367.99	378.03	327.11	315.21	388.56	279.77	352.23	268.96	280.43	312.66	285.41
CiPaw.14G129900.v1.1	7.7	6.68	4.96	371.26	301.27	310.67	253.08	225.28	252.74	443.33	396.22	394.75	276.84	273.74	269.03	61.86	122.68	135.89	21.59	22.14	32.53	173.78	291.35	148.56	183.6	268.51	167.7	426.38	248.8	355.09	307.51	302.47	199.81	93.66	145.55	47.12
CiPaw.15G012500.v1.1	265.33	276.24	257.09	698.94	675.69	647.26	531.89	493.28	490.66	511.23	510.62	476.78	400.55	384.63	383.35	296.88	336.62	324.1	257.32	256.81	251.08	523.42	569.63	501.51	437.26	427.62	407.05	384.63	350.8	382.51	324.36	304.66	312.05	385.26	378.12	382.71
CiPaw.03G228300.v1.1	519.23	524.83	466.3	51.4	68.48	43.16	139.16	102.66	147.53	163.88	215.09	213.3	174.86	280.76	184.34	393.18	367.32	435.72	537.58	524.71	561.45	302.26	265.43	235.33	318.41	317.93	331.8	322.47	419.18	328.48	269.62	233.41	339.87	257.3	277.35	353.86
CiPaw.10G004000.v1.1	42.14	45.39	41.77	386.62	310.52	259.28	357.79	275.57	358.48	174.09	238.38	269.11	175.84	109.41	91.01	49.92	75.15	67.9	42.72	40.02	42.24	216.8	215.79	181.54	181.76	163.45	171.61	162.13	188.95	188.9	105.47	212.41	140.39	53.3	79.65	55.58
CiPaw.12G051100.v1.1	208.56	233.79	204.76	596.52	568.26	525.09	517.32	478.49	471.87	475.67	495.25	467.26	374.77	321.73	332.89	266.25	285.24	266.64	261.22	257.2	259.09	527.06	520.09	482.74	412.61	385.09	382.52	331.25	337.46	354.31	281.66	272.79	273.29	372.71	352.7	313.23
CiPaw.05G134100.v1.1	183.27	139.31	141.07	273.69	189.81	229.42	854.86	559.65	759.32	203.84	260.75	239.33	46.43	34.43	29.35	90.67	70.7	75.73	394.22	476.38	442.65	104.63	123.39	116.98	138.03	144.91	146.87	45.01	50.39	71.7	27.7	16.97	33.39	36.92	19.91	31.08
CiPaw.01G105600.v1.1	380.31	360.02	373.43	629.48	582.95	608.69	794.29	661.48	659.69	1080.78	912.63	968.36	628.6	623.77	655.66	724.17	985.79	1064.74	527.14	553.44	592.44	624.27	583.48	544.93	667.99	521.05	666.95	984.5	732.83	902.63	509.52	376.82	522.41	643.98	548.41	591.55
CiPaw.05G046100.v1.1	243.12	243.97	264.06	104.01	122.77	67.72	45.36	67.78	63.51	53.78	46.9	34.44	83.63	166.54	118.16	91.8	162.39	108.03	376.13	291.8	270.79	262.71	186.64	298.35	324.58	288.29	309.48	148.63	178.07	168.4	181.78	148.26	189.58	291.17	328.08	258.76
CiPaw.08G179000.v1.1	287.01	306.79	317.74	543.36	512.07	451.17	485.89	511.45	513.46	607.07	567.11	558.47	396.39	362.88	407.83	296.97	330.52	306.25	323.45	305.29	292.78	563.75	599.64	496.14	418.76	466.82	436.4	349.78	344.35	368.26	286	342.48	280.69	442.24	414.17	334.3
CiPaw.08G137900.v1.1	191.53	206.64	184.8	24.88	50.55	29.73	71.72	41.77	56.55	45.63	55.81	46.73	95.14	237.35	185.16	120.44	269.86	230.48	182.06	177.27	173.09	125.73	93.8	113.32	251.85	163.2	189.72	255.99	288.04	279.78	519.25	373.01	335.87	687.22	669.37	474.28
CiPaw.05G221000.v1.1	99.73	89.33	88.51	203.87	186.41	170.14	512.82	379.73	447.11	274.92	279.33	335.95	172.9	128.87	159.91	72.46	79.65	89.68	177.29	193.89	144.56	207.84	279.87	316.24	335.34	291.38	208.07	251.27	189.69	240.09	130.19	96.24	144.26	70.74	59.42	62.22
CiPaw.05G091100.v1.1	133.09	131.96	128.39	97.71	132.31	126.14	192.23	179.38	169.76	159.47	123.64	184.72	845.04	682.13	653.09	498.79	743.91	687.25	229.39	224.36	259.79	96.51	102.37	99.31	285.04	229.55	282.75	244.96	237.39	216.86	479.19	518.7	728.63	197.87	210.23	625.92
CiPaw.04G098200.v1.1	498.76	615.28	467.96	106.14	131.74	98.9	183.14	114.42	143.9	119.42	123.7	128.26	163.29	262.16	201.39	162.91	266.02	246.05	527.64	547.94	464.59	253.99	264.4	249.57	280.95	255.13	218.86	339.98	308.59	253.54	381.54	331.53	339.89	472.83	305.28	289.81
CiPaw.11G084000.v1.1	1130.06	979.76	1019.08	19.26	24.78	23.44	44.44	127.79	83.31	198.37	263.46	230.96	165.44	237.49	269.46	360.85	314.17	215.75	115.43	114.49	102.52	122.32	86.36	55.05	223.79	260.74	310.84	285.44	255.88	206.63	317	203.22	335.8	260.95	278.31	246.76
CiPaw.05G009500.v1.1	520.3	621.36	576.44	73.26	81.01	71.78	75.3	93.48	66.24	118.4	140.86	161	358.59	227.45	279.54	213.21	172.77	220.67	56.19	75.44	91.24	88.55	95.3	54.86	162.21	152.77	240.35	289.34	184.4	121.4	261.32	299.74	294.37	277.35	194.37	257.29
CiPaw.02G188200.v1.1	508.54	516.25	433.01	16.79	30.79	30.79	53.76	35.45	66.99	24.16	22.76	35.48	124.41	262.52	168.07	301.45	328.16	322.2	94.11	117.95	106.13	79.74	87.46	77.63	84.79	114.48	98.62	135.01	206.54	150.73	601.7	310.64	465.29	360.78	233.15	228.71
CiPaw.06G172500.v1.1	403.55	530.5	546.41	5.38	6.15	5.04	8.73	21.4	10.31	38.47	35.85	51.77	288.96	145.67	219.74	98.68	110.47	117.97	15.65	15.35	18.21	10.78	9.65	6.48	95.41	132.65	168.23	205.26	129.54	79.27	294.5	365.94	266.63	211.61	98.38	198.89
CiPaw.02G099900.v1.1	330.56	364.25	354.27	594.78	651.83	590.77	531.88	555.28	533.4	608.51	575.44	600.69	543.06	488.6	506.51	379.04	405.37	390.4	435.43	411.59	415.36	589.08	645.76	643.87	504.84	549.95	566.37	476.18	432.3	448.03	373.3	430.96	321.82	401.56	375.65	316.85
CiPaw.08G047500.v1.1	160.71	250.34	201.36	11.15	10.74	8.36	38.46	75.06	42.05	100.16	84.07	130.03	320.36	207.83	275.1	158.79	98.99	176.74	12.82	11.22	9.52	16.25	16.5	17.4	179.28	227.87	209.17	289.77	221.19	167.39	213.25	236.55	286.73	107.52	129.6	255.65
CiPaw.09G204100.v1.1	26.86	31.12	20.79	248.99	166.91	237.12	140.51	87.12	103.81	184.41	241.28	198.44	758.34	292.39	428.94	307.99	218.97	240.12	18.63	26.35	38.57	186.77	178.66	168.07	50.89	62.18	82.66	85.07	43.13	54.14	153.95	335.9	192.44	115.37	70.71	124.65
CiPaw.07G216800.v1.1	62.77	58.5	62.36	470.74	508.77	507.54	262.33	312.97	241.55	275.37	382.21	214.82	406.55	149.9	270.33	381.99	335.82	281.81	278.14	271.58	309.38	140.3	161.41	157.67	177.1	127.43	116.71	120.75	94.84	103.14	239.8	262.89	159.19	256.45	250.24	224.22
CiPaw.07G082200.v1.1	131.52	101.14	119.03	9.16	10.76	8.14	19.55	19.24	19.41	12.87	10.26	9.47	105.72	282.78	88	160.42	269.49	197.91	686.14	727.53	776.2	142.85	95.26	110.43	25.38	44.13	34.69	45.38	58.65	56.83	258.52	267.82	204.19	257.24	299.94	211.73
CiPaw.14G050000.v1.1	166.21	146.1	127.41	79.47	108.78	84.98	165.91	194.16	156.04	168.37	127.18	110.21	107.02	191.12	149.87	139.21	258.16	250.89	199.04	171.24	178	540.72	413.7	567.25	402.35	241.7	292.3	341.5	378.49	405.08	405.52	406.91	366.13	627.61	632.3	502.72
CiPaw.11G184900.v1.1	202.34	154.86	159.75	13.55	14.43	14.6	49.85	67.58	69.14	73.98	59.8	92.33	101.69	162.11	139.58	230.27	96.51	138.32	277.31	266.89	290.39	224.07	227.44	202.44	413.79	496.22	387.29	616.9	704.15	534.37	177.9	71.23	245.11	55.6	106.99	97.29
CiPaw.01G085000.v1.1	441.5	489.91	473.75	2.9	4.21	2.12	3.48	3.43	7.73	5.33	5.73	15.61	55.4	178.66	85.03	205.53	205.92	238.1	348.69	335.33	388.74	56.66	38.06	30.07	127.68	187.72	115.17	97.6	133.3	124.54	141.12	104.24	175.01	207.56	131.94	110.51
CiPaw.04G039100.v1.1	4.85	4.31	6.45	602.51	559.32	639.81	264.11	288.89	311.95	355.08	405.19	374.83	183.61	87.3	152.33	220.93	129.86	139.82	6.62	7.26	21.99	486.29	401.05	324.75	81.21	93.81	86.38	84.08	61.25	93.8	34.41	93.62	39.41	73.32	58.51	41.49
CiPaw.12G113800.v1.1	0.55	0.92	0.31	957.7	656.06	1056.47	345.98	482.02	369.71	343.66	343.34	282.54	138.62	61.34	98.57	26.67	30.37	36.49	2.44	2.5	3.23	190.88	296.16	274.84	146.79	82.41	186.59	192.48	75.49	179.01	43.01	111.34	42.13	30.17	62.75	66.5
CiPaw.01G145500.v1.1	524.09	529.92	523.8	48.34	51.93	51.95	52.67	101.35	63.94	160.56	171.8	174.42	302.68	213.61	327.92	229.02	179.8	153.08	40.75	47.88	50.28	91.57	92.2	52.41	186.73	222.54	237.73	229.87	177.21	132.34	274.37	305.66	290.51	214.49	206.53	255.69
CiPaw.04G155100.v1.1	366.33	341.96	303.71	245.58	343.89	270.35	231.51	241.08	277.48	215.89	242.89	267.21	287.32	437.43	301.27	336.93	433.68	406	501.16	489.42	495.64	660.19	668.66	644.26	457.41	466.72	457.68	316.45	424.87	367.54	487.61	380.78	456.92	344.57	374.89	427.75
CiPaw.09G054800.v1.1	1.46	0.76	0.94	602.95	514.35	723.59	386.89	342.31	281.86	474.47	256.02	230.54	203.55	84.47	162.79	67.81	117.88	163.12	0.75	0.33	1.48	200.63	256.4	246.19	136.88	69.53	102.87	101.13	50.22	163.64	111.85	156.27	73.71	118.03	230.6	59.04
CiPaw.06G022600.v1.1	361.67	285.06	297.74	0.32	0.2	0.19	1.15	1.95	5.41	26.04	16.45	22.04	107.56	353.2	236.17	457.49	503.58	555.09	131.15	90.59	99.09	7.65	6.61	13.54	56.93	35.2	43.72	56.88	52.67	92.95	207.24	137.5	186.1	394.63	324.18	148.74
CiPaw.15G111700.v1.1	87.8	67.46	84.55	227.93	189.91	166.69	1134.68	642.36	857.19	229.7	318.76	249.05	129.94	66.48	66.77	113.43	54.42	84.54	399.33	477.96	381.76	244.9	308.02	418.27	237.68	320.28	223.05	80.36	69.21	51.94	85.35	84.22	68.47	16.95	16.58	22.16
CiPaw.15G000500.v1.1	184.69	194.13	178.01	580.95	560.68	462.46	369.42	330.54	346.92	418.17	484.89	426.98	288.91	285.47	241.25	185.45	250.64	242.67	294.22	284.23	278.88	544.24	543.94	503.94	400.38	393.55	392.34	432.19	421.02	443.6	298.72	395.57	300.29	239.95	278.6	256.06
CiPaw.02G064600.v1.1	153.38	163.23	151.09	205.47	222.41	149.31	158.9	191.95	173.08	210.66	175.39	200.1	568.01	437.38	490.01	221.74	469.59	321.59	49.95	59.33	58.7	252.51	279.52	253.74	330.42	345.86	387.03	284.03	179.43	192.88	551.57	605.89	576.12	350.58	348.44	634.25
CiPaw.04G071200.v1.1	71.03	80.33	95.91	754.26	1012.3	992.13	483.94	434.95	441.43	447.1	380.59	393.45	405.48	220.49	358.99	195.77	129.31	159	134.54	126.87	139.28	513.02	533.09	603.7	167.9	236.29	218.15	172.93	128.6	202.37	108.74	195.43	126.25	119.27	154.14	126.79
CiPaw.15G034500.v1.1	106.42	105.85	106.56	1232.67	957.54	1148.31	1181.95	820.19	1008.15	571.87	760.02	696.38	343.86	224.29	350.05	319.88	273.73	292.74	31.18	50.45	68.73	303.53	294.96	261.41	198.44	223.74	257.51	218.55	175.83	199.02	206.52	311.17	223.87	201.71	174.38	165.21
CiPaw.15G051700.v1.1	835.01	651.29	680.86	115.63	192.7	186.83	152.24	167.86	149.91	230.45	230.59	187.13	507.1	744.61	514.72	1980.61	1323.68	1502.87	575.75	541.74	574.28	123.27	84.75	139.8	142.44	248.36	314.22	190.43	222.13	162.35	139.06	103.52	195.67	225.93	152.31	256.73
CiPaw.05G116600.v1.1	1077.43	941.96	1153.73	19.05	49.19	16.2	3.56	0	2.84	4.02	2.24	5.28	38.98	84.9	28.25	385.43	214.53	420.68	731.48	791.41	843.38	310.65	218.44	163.15	54.44	91.59	80.18	51.52	127.61	52.53	174.14	46.69	227.65	95.02	121.05	134.47
CiPaw.15G146100.v1.1	725.13	699.15	787.21	99.04	99.4	94.42	263.9	316.16	331.59	271.55	290.62	319.83	460.8	315.35	426.97	325.44	318.34	235.68	236.98	229.24	197.31	117.65	125.7	131.08	373.11	404.03	459.75	272.74	257.5	212.25	398	414.51	310.66	340.97	220.34	203.22
CiPaw.14G107700.v1.1	222.92	242.99	234.66	419.43	443.62	386.62	463.3	427.87	447.92	454.78	504.63	497.57	364.82	347.87	351.88	241.01	281.57	265.7	269.92	260.46	251.29	432.57	498.28	436.52	405.52	391.8	387.28	351.66	367.03	374.86	274.78	276.19	261.26	249.21	281.22	273.27
CiPaw.07G050700.v1.1	29.43	24.39	27.47	298.48	382.19	347.49	227.77	309	264.41	310.6	331.71	227.72	145.98	87.52	154.75	139.37	150.33	137.35	6.72	7.4	15.68	221.71	279.26	280.73	145.85	152.81	142.37	125.04	59.15	147.58	57.53	74.78	62.07	50.51	75.34	81.87
CiPaw.03G196200.v1.1	1292.84	1079.22	1711.48	11.58	5.33	5.19	33.1	34.82	52.74	120.9	105.22	135.17	220.31	660.96	179.98	466.51	363.21	307.67	158.03	210.2	225.87	182	141.19	149.6	34.56	152.87	97.04	205.62	86.26	180.89	54.18	50.51	53.58	76.71	82.62	46.48
CiPaw.11G199600.v1.1	275.79	289.5	262.47	619.69	577.42	529.93	502.88	533.04	524.16	515.33	528.42	505.86	416	376.41	394.02	316.07	345.25	342.13	330.16	296.96	319.67	586.84	595.36	520.87	483.03	488.05	478.19	426.24	373.93	403.83	349.55	341.79	337.95	428.34	426.72	374.92
CiPaw.02G174000.v1.1	15.36	11.13	6.81	164.53	223.82	124.86	180.19	131.77	174.61	216.65	309.44	257.99	224.59	270	240.75	61.68	316.84	311.94	4.85	4.75	8.55	108.6	220.95	184.1	269.47	171.54	197.46	381.14	205.21	299.46	400.38	499.31	227.47	359.58	385.75	283.42
CiPaw.05G018800.v1.1	543.34	541.15	452.96	210.85	250.14	184.69	322.44	261.7	284.34	275.75	259.05	260.6	325.92	371.95	311.74	385.33	445.46	414.41	696.56	728.86	703.81	496.25	396.12	416.85	345.25	422.42	378.18	410.75	408.45	314.64	449.59	365.97	425.07	796.67	461.19	562.28
CiPaw.01G095900.v1.1	350.61	359.71	353.99	518.57	713.56	593.71	375.37	447.84	396.51	459.5	400.01	418.55	512.69	557.41	515.59	373.23	436.63	426.36	612.67	567.94	527.34	560.2	682.47	774.26	607.08	663.36	628.89	577.8	548.08	503.35	583.38	697.45	558.75	533.44	445.84	439.78
CiPaw.01G148800.v1.1	558.8	453.38	376.31	175.92	193.02	195.26	371.59	406.01	392.8	389.65	429.25	458.22	569.68	582.4	524.03	555.29	411.46	538.67	492.65	612.55	553.05	189.49	200.38	206.1	341.68	345.64	420.71	436.68	395.34	365.7	517.56	449.18	537.84	600	341.48	454.53
CiPaw.05G264500.v1.1	162.35	191.61	176.43	468.52	467.98	445.15	494.53	451.56	476.91	406.29	477.09	447.86	387.66	362.18	378.96	265.52	308.4	245.94	227.84	209.41	197.78	394	442.37	412.1	440.55	430.19	364.24	313.8	305.29	364.56	302.18	349.73	275.26	270.08	356.57	260.6
CiPaw.11G122600.v1.1	507.54	514.54	532.73	428.83	411.05	412.84	349.61	442.84	338.07	532.62	432.52	473.48	762.41	442.39	650.36	580.95	513.13	456.86	82.35	95.2	102.35	345.48	303.59	329.8	360.77	421.26	552.98	499.62	325.96	412.68	425.58	543.27	426.39	483.54	338.96	343.23
CiPaw.13G096800.v1.1	226.47	292.22	208.7	473.28	459.11	389.23	443.11	187.89	276.28	170.29	194.8	122.03	67.7	73.26	83.7	68.23	101.23	83.84	294.81	276.61	228.99	239.48	300.27	280.16	200.9	183.77	229.83	214.09	131.56	147.22	80.4	72.64	65.34	191.63	111.65	129.76
CiPaw.10G165200.v1.1	907.36	774.95	807.34	27.76	39.75	34.79	26.09	60.29	38.54	76.51	86.75	71.71	144.45	175.04	206.95	306.58	182.49	242.41	105.53	233.9	278.6	76.67	61.87	58.12	92.81	92.54	117.84	188.97	267.48	131.61	172.44	202.97	334.42	173.46	195.81	280.08
CiPaw.11G110000.v1.1	521.33	500.65	466.59	82.02	67.93	92.46	90.71	81.41	84.19	202.64	266.8	197.38	317.57	217.88	461.4	394.06	284.03	353.29	147.26	166.07	210.82	129.32	142.65	72	150.78	171.55	294.93	210.51	137.3	82.39	238.1	452.39	253.99	355.49	146.55	259.48
CiPaw.08G010400.v1.1	502.2	413.76	349.96	0.71	1.09	0	3.34	3.52	2.99	17.15	16.48	57.95	54.38	169.16	96.24	55.61	65.02	58.76	669.21	581.9	579.1	29.79	53.05	26.25	90.35	174.71	90.8	61.77	102.53	83.86	183.29	104.84	236.27	183.14	207.69	393.15
CiPaw.03G108900.v1.1	5.39	4.24	4.24	154.94	174.22	258.17	135.2	66.28	66.9	116.27	170.33	133.83	97.92	76.48	94.55	6.29	25.18	18.45	150.86	113.95	117.06	1809.95	1526.79	1577.6	640.96	1499.16	1011.46	417.9	404.67	410.93	234.97	114.15	217.14	124.55	110.14	217.07
CiPaw.11G199100.v1.1	201.59	227.11	210.75	65.7	80.4	62.13	70.75	88.29	70.86	106.28	89.34	111.93	328	344.13	266.07	331.57	382.92	355.43	206.23	231.99	270.46	68.45	83.21	86.62	111.79	107.28	103.32	141.89	140.02	125.5	277.42	296.86	324.26	192.57	198.8	407.13
CiPaw.08G041800.v1.1	374.87	381.58	405.39	652.25	353.09	689.09	491.6	538.26	558.99	521.9	752.19	638.67	414.79	226.37	459.97	510.58	329.39	313.1	69.67	59.93	67.57	312.68	306.57	208.32	271.58	330.9	363.97	425.61	277.16	284.85	313.52	443.75	330.76	318.49	271.4	359.94
CiPaw.05G004000.v1.1	148.36	139.82	141.67	209.05	200.52	192.79	406.2	309.52	373.75	411.42	388.12	419.69	676.3	330.22	489.7	278.21	265.41	358.61	270.6	289.47	281.6	302.65	380.32	461.34	286.44	301.65	270.33	414.73	425.98	307.59	316.54	295.06	313.58	152.54	168.76	174.91
CiPaw.01G182300.v1.1	161.95	180.97	172.93	484.31	490.52	461.01	416.52	389.8	399.4	328.38	377.77	362.11	300.51	271.95	286.33	183.74	223.24	198	201.94	174.35	182.58	403.78	458.77	429.78	365.97	357.9	325	251.21	263.8	282.44	245.36	259.52	223.24	237.29	298.52	256.43
CiPaw.01G116000.v1.1	144.04	175.24	183.47	78.66	44.43	94.66	81.2	122.45	54.71	167.6	132.99	147.42	614.53	442.18	565.32	405.04	453.67	278.05	11.76	22.75	32.18	52.96	48.53	20.47	86.92	107.08	128.91	138.69	79.39	64.45	335.18	366.91	270.03	337.49	179.02	286.47
CiPaw.09G052400.v1.1	359.9	329.8	340.47	107.6	121.71	108.86	226.3	276.6	259.95	382.57	321.9	349.56	656.39	442.27	639.36	335.17	361.19	311.34	145.07	168.56	172.36	162.23	181.56	140.81	323.2	422.35	518.99	390.89	267.34	275.55	406.5	364.12	477.16	440.67	393.95	448.01
CiPaw.04G017600.v1.1	288.98	301.85	305.85	571.11	557.35	523.1	538.49	556.48	542.14	584.68	572.8	582.7	410.36	421.58	420.28	357.83	330.03	364.45	376.24	337.13	343.19	646.56	725.78	590.56	454.96	484.89	456.46	401.51	377.95	430.39	311.49	397.87	313.24	389.08	387.71	347.24
CiPaw.16G113400.v1.1	317.73	310.54	319.22	173.63	219.41	181.6	182.81	290.85	241.07	458.2	444.98	443.92	429.49	409.84	397.14	463.57	301.05	367.04	416.1	386.71	378.21	436.96	542.62	434.22	471.57	490.61	555.57	498.34	505.19	546.17	288.48	286.29	341.78	265.98	270.2	359.23
CiPaw.03G200600.v1.1	309.29	298.05	265.56	466.5	462.44	428.96	794.07	590.35	647.72	411.87	409.62	482.08	366.32	274.35	314.39	240.33	360.95	318.4	294.52	255.93	244.47	251.98	300.92	316.89	446.27	266.07	380.42	353.14	396.98	402.46	471.62	456.47	427.98	683.65	552.72	580.35
CiPaw.06G038100.v1.1	368.33	224.08	250.86	251.55	198.31	150.37	67.48	36.18	67.97	32.91	50.26	34.19	26.67	151.06	94.95	104.55	139.58	146.44	827.61	831.82	912.49	695.08	554.85	382.68	167.52	147.04	105.55	59.38	67.66	52.49	180.73	116.17	88.93	194.69	192.67	189.86
CiPaw.04G020300.v1.1	465.28	459.66	431.5	121.07	116.85	96.05	117.94	121.87	118	98.22	100.34	126.11	307.05	294.65	290.51	329.25	302.12	278.5	403.1	471.76	464.49	136.33	117.78	108.57	166.72	159.95	165.85	196.17	260.01	181.67	309.3	234.06	338.9	191.68	193.95	273.24
CiPaw.13G177900.v1.1	241.66	242.3	244.64	380.42	440.43	334.56	391.8	437.38	448.08	477.81	475.95	504.34	524.65	469.29	457.42	314.33	326.62	365.72	371.26	379.38	365.14	518.34	596.33	637.83	563.55	605.42	492.92	494.78	561.55	394.36	352.54	332.22	340.59	175.65	205.02	197.49
CiPaw.05G016200.v1.1	324.76	343.89	306.95	694.45	618.68	590.95	536.63	502.64	525.05	456.34	515.78	484.37	459.57	440.67	449.12	376.87	443.81	384.86	305.29	296.83	282.91	575.45	614.68	582.88	469.3	434.32	359.21	304.86	349.85	354.21	367.16	428.05	350.18	416.37	443.41	375.75
CiPaw.14G096200.v1.1	460.58	501.31	505.62	14.07	11.52	15.13	15.41	51.83	22.01	136.32	162.37	157.91	235.01	157.2	276.65	316.77	222.91	203.17	38.59	44.4	50.35	73.75	52.7	30.61	122.5	132.71	164.3	174.7	133.55	104.14	209.07	400.36	214.96	193.03	149.76	220.25
CiPaw.09G158000.v1.1	491.84	588.08	619.83	48.28	46.04	50.48	112.73	104.04	98.83	101.23	134.97	146.1	383.51	247.33	475.51	223.13	171.26	220.07	51.99	57.48	68.45	61.91	58.78	35.5	138.74	145.84	184.88	127.73	116.93	85.32	288.23	291.12	325.72	155.11	153.81	232.98
CiPaw.01G005000.v1.1	281.74	262.04	205.42	678.55	637.45	634.75	579.88	542.28	507.46	547.88	524.11	522.26	436.8	405.61	440.74	335.74	421.91	379.78	341	383.14	361.08	753.75	759.98	733.75	495.21	433.1	390.85	442.47	435.63	449.32	354.52	317.58	419.72	482.9	461.73	424.03
CiPaw.09G122300.v1.1	119.09	209.55	219.1	49.87	41.45	42.45	19.03	32.07	17.51	60	35.64	60.57	299.03	247.11	321.32	287.85	313.91	230.67	9.34	16.17	26.67	110.98	75.86	45.03	82.85	108.9	156.24	166.29	49.59	55.85	270.07	513.91	247.18	311.8	133.7	235.25
CiPaw.14G008900.v1.1	133.78	109.84	98.64	306.16	309.78	296.05	490.08	400.89	430.67	322.41	295.82	314.07	307.69	198.05	228.12	146.94	157.51	174.19	202.02	213.19	167.91	215.98	250.76	312.69	294.57	313.07	243.01	267.91	173.72	191.26	140.01	203.42	160.93	95.35	79.24	81.16
CiPaw.07G227300.v1.1	459.93	507.25	520.13	33.25	30.38	31.51	35.46	82.68	48.42	114.73	113.08	117.22	219.44	196.24	265.05	225.33	240.04	208.44	83.76	68.52	71.41	92.26	72.76	56.89	133.75	125.94	153.87	195.16	156.82	146.78	235.84	352.86	235.84	249.87	276.74	325.53
CiPaw.05G155400.v1.1	323.18	385.26	390.33	1227.01	883.13	1227.64	704.27	670.28	639.66	590.74	556.11	655.01	298.53	344.63	376	360.67	344.43	322.25	465.7	349.16	384.27	426.75	426.85	500.91	498.88	552.33	457.24	405.17	355.75	439.84	424.23	438.45	550.56	377.05	359.32	642.56
CiPaw.02G119500.v1.1	172.66	181.6	165.81	104.79	133.29	100.15	82.13	49.52	74.06	65.87	73.54	66.89	94.14	273.38	167.39	276.01	280	240.03	402.02	390.62	595.48	392.96	320.22	245.67	167.14	218.05	159.96	126.57	124.41	139.83	272.13	252.44	233.99	251.93	338.4	342.54
CiPaw.07G112300.v1.1	366.83	397.23	384.27	563.32	536.72	485.61	514.84	535.9	512.98	607.38	572.4	581.33	386.02	387.42	376.94	329.21	365.11	359.11	388.31	361.11	351.31	618.85	640.92	572.15	517.48	535.74	534.79	467.33	449.13	472.65	347.03	328.64	336.05	464.11	443.95	376.69
CiPaw.01G073900.v1.1	497.61	542.16	609.13	10.92	9.1	8.4	19.64	50.61	23.03	83.86	75.72	92.93	215.2	116.49	214.82	150.41	123	129.95	30.13	34.53	43.16	37.23	31.55	19.44	115.64	133.29	163.81	231.43	147.66	103.34	195.84	254.13	208.74	185.68	173.19	189.26
CiPaw.10G080700.v1.1	182.73	148.43	156.34	405.71	514.89	509.05	438.07	505.68	508.36	623.63	661.99	681.08	474.05	605.39	592.06	520.98	549.59	590.35	154.2	136.64	128.7	369.2	391.74	356.28	536.82	472.67	550.45	496.75	523.28	510.95	585.83	671.67	527.47	605.28	487.07	465.43
CiPaw.01G303900.v1.1	0	0	0	349.84	297.06	256.86	335.59	169.07	199.38	195.92	220.27	229.97	60.6	21.96	15.11	8.75	73.04	46.28	2.33	1.61	0	126.25	129.06	167.45	85.28	111.34	123.9	144.21	92.81	169.86	38.42	96.56	68.73	26.46	14.14	6.98
CiPaw.05G132900.v1.1	216.11	161.03	130.87	1788.02	1395.3	1711.12	518.01	485.51	413.29	333.65	359.77	288.25	196.19	158.77	184.65	57.24	135.01	72.99	186.07	130.13	133.22	198.09	242.28	298.11	366.66	279.34	261.39	88.84	115.23	98.97	123.05	55.81	180.89	214.81	235.99	257.7
CiPaw.09G178600.v1.1	362.84	367.31	324.46	183.24	184.64	190.64	235.2	244.65	212.68	224.09	205.83	239.56	422.66	452.01	443.51	386.46	508.85	364.55	289.64	331.29	320.92	227.95	218.69	228.56	309.72	284.12	311.88	336.1	311.67	310.01	480.01	418.75	435.07	367.84	393.02	428.88
CiPaw.09G125300.v1.1	222.58	234.29	245.33	493.94	466.44	443.85	442.18	438.89	439.95	440.73	484.38	429.27	360.57	283.15	330.3	210.09	278.91	246.34	299.73	251.18	258.98	481.6	508.55	459.54	409.04	383.98	367.8	327.62	317.62	336.9	277.9	304.82	292.89	319.33	331.02	319.55
CiPaw.14G008200.v1.1	506.09	545.01	443.99	21.97	25.52	12.16	50.72	45.29	56.76	73.68	97.71	117.64	65.03	136.1	95.5	57.34	117.48	104.01	996.01	952.56	863.03	124.68	135.77	130.83	231.73	209.86	176.97	177.54	232.82	178.49	172.01	118	222.04	401.41	274.35	556.12
CiPaw.02G083100.v1.1	150.34	162.82	165.13	486.01	454.66	412.33	432.38	390.52	386.3	348.06	361.56	382.2	301.23	330.55	310.24	213.61	246.97	227.42	224.92	188.32	203.37	412.43	486.37	408.74	359.99	366.45	312.34	246.82	272.21	298.05	245.86	270.77	209.74	226.3	305.23	194.15
CiPaw.10G071900.v1.1	534.87	539.63	532.85	86.53	142	104.24	209.78	234.33	258.41	235.38	260.43	259.21	321.23	380.49	319.1	437.38	426.33	442.71	555.06	556.59	550.44	280.12	227.82	237.04	307.99	264.08	240.17	322.36	397.31	355.39	363.56	283.69	385.16	291.25	350.74	328.01
CiPaw.10G103600.v1.1	244.51	292.35	292.92	54.32	48.97	57.13	36.92	64.39	37.89	119.64	114.06	126.32	331.07	224.95	351.33	186.49	160.22	150.09	17.92	24.27	23.75	65.92	72.58	50.84	133.26	160.4	175.24	198.47	143.83	108.8	249.06	279.11	239.67	199.79	134.55	196.64
CiPaw.06G101500.v1.1	194.28	220.27	200.49	608.4	561.19	547.14	544.19	542.07	507.3	512.97	574.98	539.27	416.35	353.98	379.23	312.8	337.67	324.42	222.77	220.44	214.98	459.57	508.62	426.42	398.03	343.48	327.52	289.08	315.28	342.75	276.26	330.75	286.28	280.68	361.24	312.68
CiPaw.02G124000.v1.1	546.88	509.84	450.58	174.35	180.6	171.17	187.65	172.62	185.93	227.73	246.58	229.94	262.62	359.82	297.98	384.22	393.55	411.17	807.38	766.94	726.89	342.09	352.61	328.43	384.33	375.52	403.2	388.25	447.23	404.13	448.5	314.4	475.59	451.35	407.31	586.47
CiPaw.01G282500.v1.1	16.57	24.74	16.14	41.95	62.51	12.88	57.4	40.37	79.42	67.65	112.48	91.68	298.23	423.71	515.63	238.25	675.25	693.14	40.4	17.86	24.75	222.53	56.99	19.17	119.13	50.27	64.92	115.73	108.1	135.95	497.92	346.62	535.07	492.95	801.23	518.34
CiPaw.03G195900.v1.1	313.76	288.51	347.78	8.45	9.33	15.47	12.46	22.92	4.99	20.88	49.16	28.51	120.06	183.24	122.81	235.46	208.73	146.78	222.27	397.11	433.42	58.68	41.68	37.32	20.77	30.26	42.82	66.62	97.03	71.98	138.89	168.29	130.34	117.44	137.08	279.52
CiPaw.03G137300.v1.1	7.96	8.21	6.02	985.43	601.97	818.19	1892.11	1093.02	1715.02	545.32	699.65	809.41	80.26	66.73	66.94	22.18	77.12	62.14	17.56	12.89	12.99	101.95	88.38	87.81	273.54	268.61	346.63	213.21	187.32	257.25	67.3	130.16	77.81	47.37	33.33	23.33
CiPaw.01G008400.v1.1	233.6	290.63	249.27	73.45	54.61	48.86	121.04	93.94	118	152.96	157.84	218.78	168.76	240.38	185.43	160.27	323.64	309.23	378.99	362.08	324.37	52.98	45.56	54.69	238.17	221.47	225.2	294.02	253.53	223.14	286.36	282.84	309.02	455.47	307.81	491.95
CiPaw.08G067400.v1.1	259.98	196.32	207.03	13.49	21.21	8.72	10.56	13.36	14.7	22.45	23.6	18.77	82.79	186.23	164.96	169.17	180.88	173.56	274.33	241.52	215.31	68.49	64.34	66.47	82.66	95.28	73.63	89.22	118.21	65.82	175.3	94.77	198.63	221.84	196.38	121.34
CiPaw.05G124300.v1.1	708.08	739.46	687.76	557.89	654.83	601.9	971.28	974.01	971.59	812.9	772.21	839.12	888.95	989.28	932.63	790.36	870.17	815.44	927.14	893.93	855.34	689.21	732.29	790.77	1068.72	965.81	943.79	805.47	811.5	864.57	870.56	751.61	784.94	932.85	814.75	825.02
CiPaw.13G087300.v1.1	111.16	113.4	117.9	158.33	205.95	166.24	219.65	277.54	295.81	259.28	280.63	271.18	197.8	289.95	247.67	178.9	157.89	167.9	46.53	54.67	53.56	246.45	258.74	251.93	462.36	369.29	338.26	298.99	299.55	434.31	151.98	69.26	142.64	89.03	110.32	162.85
CiPaw.12G126600.v1.1	480.1	497.4	518.24	223.69	301.25	267.76	214	184.1	186	184.9	194.7	183.99	253.9	375.47	334.39	383.42	350.72	323.44	366.32	382.58	403.19	244.45	243.27	317.28	233.97	244.56	222.59	198.21	224.84	233.17	388.72	392.65	332.32	387.56	399.86	380.31
CiPaw.16G048400.v1.1	0.12	0.5	0.64	270.98	315.95	229.53	250.07	290.33	229.2	288.7	202.5	194.18	136.46	86.05	136.32	38.94	79.12	93.73	0.61	0.12	0.36	221.21	184.85	264.34	232.98	225.82	252.8	248.33	164.01	337.8	133.91	186.21	137.35	102.88	111.01	61.75
CiPaw.09G007000.v1.1	15.07	13.01	12.26	281.01	225.6	262	849.69	509.96	848.14	491.83	598.17	657.9	23.14	11.25	9.8	45.49	66.26	59.87	29.38	40.58	53.2	130.79	134.24	123.95	148.51	180.37	224.09	168.76	188.2	148.65	13.54	22.73	25.81	54.08	27.65	38.84
CiPaw.09G055500.v1.1	218.01	210.96	234.06	331.64	343.82	264.69	659.46	444.22	612.93	420.55	389.84	354.75	468.33	363.43	460.9	400.28	324.69	373.03	260.7	253.97	233.5	345.9	420.44	421.74	405.59	408.11	549.84	255.23	292.88	292.8	265.12	271.44	334.88	196.12	345	228.45
CiPaw.13G031400.v1.1	191.81	224.24	179.98	345.71	328.72	342.45	232.66	210.95	203.59	231.38	217.05	194.25	442.94	391.78	357.95	311.85	501.01	378.5	302.49	348.9	420.8	411.41	436.05	473.45	314.19	363.64	319.9	343.96	236.93	199.42	378.97	431.17	336.45	697.24	355.94	322.5
CiPaw.15G058600.v1.1	106.03	109.08	116.65	274.83	715.27	418.56	183.89	139.02	219.53	62.48	92.36	106.54	629.6	1136.36	539.96	1041.37	211.74	476.31	265.1	268.41	296.13	234.41	177.92	108.03	50.06	43.69	41.47	153.13	296.2	126.67	32.54	133.51	148.03	82.46	107.97	131.25
CiPaw.03G061100.v1.1	95.19	99.63	91.1	409.81	302.99	417.5	1832.88	1207.88	1918.94	698.97	892.39	941.84	46.21	16.78	18.28	143.84	167.52	132.71	79.56	106.72	116.11	175.86	198.12	189.57	220.35	198.65	230.9	171.47	232.42	196.85	24.15	59.15	28.13	100.09	68.21	112.62
CiPaw.11G184200.v1.1	287.87	440.39	397.15	2.39	8.84	3.81	5.14	11.6	7.42	24.65	20.02	34.33	326.16	264.09	301.82	289.27	168.76	328.95	33.76	21.58	26.86	9.14	12.82	14.23	58.61	88.34	89.61	107.96	82.25	47.16	186.42	256.6	296.2	88.3	136.38	271.57
CiPaw.08G097700.v1.1	699.74	611.67	613.2	28.07	42.9	26.64	60.4	64.7	58.34	52.35	38.04	48.19	114.63	272.67	153.18	197.07	178.29	198.73	674.84	594.84	582.05	98.91	99.83	111.83	166.21	179.51	237.2	174.65	214.93	170.16	217.25	69.39	168.68	251.36	145.38	171.72
CiPaw.05G251200.v1.1	201.93	191.57	191.72	328.37	381.34	315.52	516.15	406.46	452.46	321.46	309.3	336.42	325.83	308.89	301.23	290.85	236.01	287.88	380.11	406.8	369.4	287.41	354.92	419	469.88	521.71	457.38	232.4	182.1	192.99	228.68	268.4	233.87	147.98	137.32	109.58
CiPaw.04G048000.v1.1	239.69	218.16	208.66	502.09	546.26	512.1	377.35	366.38	361.72	302.35	243.47	232.43	272.78	382.54	323.58	300.06	361.14	365.42	207.24	202.66	212.52	461.75	495.4	522.13	460.18	381.99	438.44	383.17	339.35	460.28	386.34	451.77	373.2	380.06	427.67	335.08
CiPaw.03G022300.v1.1	602.24	528.89	458.28	1.08	1.33	0.97	9.17	9.34	14.54	2.21	2.56	1.3	199.56	652.58	156.9	203.1	146.93	179.99	533.24	703.75	758.65	45.9	26.52	53.77	34.62	77.4	102.74	27.65	55.09	90.88	411.43	78.81	191	119.96	53.83	31.27
CiPaw.04G103800.v1.1	363	301.54	344.83	128.57	146.12	89.03	226.38	239.41	334.01	280.17	258.83	342.97	196.45	325.97	256.54	429.79	444.73	382.82	502.01	490.53	526.13	262.06	331.81	303.31	407.84	535.11	467.9	451.61	602.54	378.97	329.44	175.09	278.88	425.32	365.35	296.54
CiPaw.06G135800.v1.1	330.78	311.26	291.93	49.56	58.99	42.84	40.03	23.77	34.45	27.65	30.43	29.17	101.62	199.43	106.48	204.63	233.21	198.78	355.63	359.68	401.54	89.6	79.67	82.54	89.31	115.17	101.01	119.33	103.28	110.88	190.8	157.77	169.22	213.24	185.24	227.89
CiPaw.05G058200.v1.1	69.36	59.25	81.29	427.85	325.82	414.29	557.15	513.7	605.76	323.71	364.53	423.21	102.13	94.14	96.98	100.07	57.97	54.36	64.75	57.51	57.44	190.17	148.29	148.84	247.77	222.62	285.94	226.78	279.62	260.85	64.17	45.22	78	36.38	45.68	63.17
CiPaw.03G241300.v1.1	4.14	6.99	3.59	229.17	251.9	152.81	417.21	182.71	261.91	144.74	230.07	199.08	47.54	51.95	43.17	8.45	24.56	40.19	8.33	5.72	5.29	166.42	186.31	151.18	146.79	119.11	144.97	169.68	121.46	190.96	79.98	185.22	98.71	56.03	29.46	10.78
CiPaw.12G018800.v1.1	314.35	321.1	309.98	460.69	551.06	447.02	454.68	436.03	470.73	381.05	343.27	370.27	418.24	508.53	425	340.96	377.15	370.06	568.35	553.82	567.13	538.96	592.47	625.21	584.98	653.58	636.33	451.81	443.05	429.42	486.36	419.24	456.26	372.57	349.88	363.39
CiPaw.08G007000.v1.1	238.18	292.91	293.12	43.25	47.45	44.29	38.72	65.3	46.73	97.84	87.23	101.79	215.69	229.92	241.7	206.9	217.81	200.34	79.13	83.41	102.8	67.32	69.4	54.12	130.81	152.9	170.27	178.43	145.31	123.22	249.53	356.14	243.89	186.25	204.06	250.96
CiPaw.01G166100.v1.1	578.38	533.18	536.68	657.97	639.76	735.26	678.8	810.59	702.84	825.26	983.27	889.48	579.26	494.19	525.36	715.81	506.65	581.2	648.75	646.21	657.95	547.64	524.56	498.6	523.43	527.81	526.81	547.6	610.45	586.75	431.6	395.06	468.64	471.12	490.24	481.36
CiPaw.01G195500.v1.1	688.37	702.52	786.87	942.77	961.34	1031.03	702.18	756.47	727.91	690.44	704.15	699.16	607.27	654.95	603.74	577.17	504.36	553.93	773.38	736.53	766.08	939.13	953.81	909.12	726.6	734.46	700.47	615.37	695.52	753.11	623.94	671.09	609.62	462.38	607.15	549.25
CiPaw.09G019800.v1.1	197.62	286.99	290.22	34.61	22.41	38.59	31.31	57.29	24.78	100.42	95.68	109.93	404.71	179.56	378.38	198.79	166.47	188.02	9.59	8.75	9.76	30.15	31.7	21.05	71.87	81.99	104.52	159.22	75.89	63.37	212.36	185.47	156.44	186.75	150.54	186.42
CiPaw.05G076700.v1.1	282.28	239.12	194.31	38.71	67.41	42.59	113.37	130.96	159.16	136.16	134.41	187.22	123.64	259.64	143.3	127.74	210.54	228.53	236.98	206.75	207.66	147.35	190.72	134.51	312.78	238.17	292.81	299.52	409.53	362.74	393.61	336.42	363.62	341.95	276.43	331.99
CiPaw.03G252800.v1.1	156.49	120.22	139.53	295.6	341.6	319.11	694.41	555.33	746.77	397.81	510.83	539.33	149.34	125.28	111.05	236.55	216.85	186.01	103.18	111.98	127.97	198.02	195.96	190.07	219.31	259.51	309.86	220.58	228.77	227.35	97.77	77.36	87.5	147.27	99.84	126.67
CiPaw.08G066900.v1.1	21.9	22.29	20	352.97	391.08	458.91	217.06	192.6	226.28	300.4	274.29	271.7	241.71	77.87	189.37	82.44	83.41	77.55	11.21	13.29	22.48	441.99	397.68	421.65	80.21	98.09	97.25	64.79	43.01	74.68	71.29	142.11	75.59	170.15	93.48	86.54
CiPaw.03G007400.v1.1	81.47	81.89	90.31	201.39	239.51	213.8	194.35	295.88	214.74	309.11	329	254.14	386.73	302.1	307.3	324.39	315.59	268.08	89.12	94.18	101.93	116.06	175.05	139.49	140.84	108.16	128.75	212.02	180.46	219.02	234.11	274.74	272.04	218.62	185.59	251.32
CiPaw.13G086200.v1.1	208.19	199.81	184.64	146.88	160.43	123.04	416.27	273.04	368.22	305.42	262.09	346.36	416.16	265.73	351.71	208.28	279.1	318.74	407.34	436.51	421.58	263.14	347.64	447.37	275.76	269.4	242.24	379.09	351.26	246.81	347.65	246.94	317.42	114.07	105.43	127.32
CiPaw.05G107300.v1.1	1.18	0.88	1.62	989.63	628.37	1178.46	351.1	329.92	299.17	371.7	226.32	255.35	141.76	51.23	116.79	90.22	97.05	73.77	2.38	3.2	12.39	276.28	355.05	229.1	94.89	73.98	129.25	110.59	53.61	115.8	47.51	138.61	52.29	88.84	91.11	48.37
CiPaw.07G131200.v1.1	187.73	149.9	153.96	364.32	253.58	334.07	428.34	469.19	487.78	338.7	332.82	373.2	168.41	217.44	187.81	296.86	232.38	240.08	246.39	242.84	221.63	219.1	184.68	239.26	432.76	342.67	335.01	508.58	582.54	544.8	229.98	130.46	241.09	168.8	177.17	205.73
CiPaw.02G000800.v1.1	204.5	219.31	220.03	194.6	267.84	289.75	110.27	147.83	86.64	92.52	96.51	121.89	525.89	467.44	420.7	545.47	526.67	366.15	202.45	220.68	201.98	257.3	281.7	165.32	130	163.49	141	186.53	184.99	157.31	437.54	467.15	384.56	332.73	269.29	294.22
CiPaw.09G114600.v1.1	589.77	610.11	701.69	9.13	9.26	10.43	18.51	53.91	23.51	84.77	96.01	106.74	309.45	108.76	254.37	176.12	183.87	203.55	71.98	78.97	94.06	19.58	14.39	14.71	65.24	71.55	102.27	92.58	57.41	46.28	169.87	220.19	174.02	109.33	116.28	109.51
CiPaw.02G066600.v1.1	243.68	272.01	232.78	620.02	604.91	562.05	465.97	488.26	466.64	535.31	556.39	500.95	409.72	324.65	349.73	274.73	321.14	308.09	259.85	267.39	264.1	553.81	579.6	520.78	409.61	382.25	359.36	336.22	323.93	333.29	282.22	263.33	256.26	307.98	326.74	290.58
CiPaw.07G236000.v1.1	19.24	16.51	15.7	312.07	330.96	328.04	346.28	403.49	389.04	425.57	454.51	457.4	204.04	134.16	169.9	146	139.22	170.35	41.09	39.63	39.34	218.23	186.08	237.32	293.35	221.97	278.7	257.28	228.83	320.14	175.76	174.07	159.37	151.89	158.97	170.17
CiPaw.04G162000.v1.1	437.42	527.3	456.63	273.77	305.52	263.72	249.4	246.45	251.42	191.9	211.43	204.39	230.69	362.57	278.2	291.63	360.82	343.5	444.4	463.36	472.56	411.53	353.54	377.75	471.9	403.91	388.79	328.91	384.64	408.07	395.7	354.84	379.55	324.65	460.79	375.79
CiPaw.01G237500.v1.1	219.85	244.44	226.39	422.61	419.01	390.37	428.49	414.42	415.38	398.34	452.98	420.03	356.15	346.65	337.68	347.56	263.97	263.24	293.59	287.81	279.94	525.56	491.65	457.36	370.27	336.91	302.12	265.09	307.61	329.83	268.52	261.34	249.76	255.04	361.92	272.23
CiPaw.16G103000.v1.1	155.5	125.11	143.77	201.8	169.66	138.03	555.89	231.32	417.93	96.96	121.86	92.37	44.03	30.29	30.18	54.84	38.15	53.67	325.68	378.17	292.93	106.63	132.22	143.93	122.4	158.43	115.76	33.06	39.19	35.63	30.26	23.96	34.87	21.94	24.06	25.68
CiPaw.13G114000.v1.1	805.74	758.28	696	977.94	1010.5	1043.15	908.56	891.53	857.99	636.21	625.16	628.41	818.53	964.39	891.94	860.3	966.92	918.12	927.03	946.76	954.32	840.29	914.67	950.65	952.85	838.43	803.42	737.33	782.49	813.14	914.46	926.24	863.64	796.6	966.05	810.48
CiPaw.09G114700.v1.1	455.51	467.95	517.55	15.16	17.31	16.61	18.68	45.61	25.11	75.37	70	85.77	264.94	138.85	247.94	191.6	172.06	183.08	46.51	78.27	96.36	43.8	37.82	31.15	103.53	106.13	153.3	171.7	173.98	93.26	211.79	243.96	282.55	128.15	162.51	206.29
CiPaw.12G056500.v1.1	256.35	272.59	270.09	448.26	469.58	482.07	529.08	523.04	508.53	437.7	522.71	462.91	457.73	385.89	431.4	337.27	280.74	291.25	433.97	417.54	405.82	508.25	583.85	515.33	478.65	404.4	418.12	291.8	334.78	344.98	317.96	343.83	305.49	278.81	342.89	354.95
CiPaw.15G058400.v1.1	79.58	78.51	76.89	344.47	404.82	304.81	116.4	128.88	155.6	148.44	171.44	208.92	284.6	251.09	206.39	324.29	268.94	385.73	67.82	80.72	99.91	501.68	314.87	238.03	77.3	151.8	100.05	161.27	231.9	148.13	61.01	78.76	138.57	69.47	62.93	86.72
CiPaw.05G202700.v1.1	13.28	14.51	17.56	256.36	188.19	326.09	289.39	219.46	141.83	233.53	275.04	200.61	413.53	156.39	301.55	253.46	267.02	161.81	1.23	1.64	4.87	52.9	54.5	56.83	58.17	52.35	45.16	48.98	25.92	32.62	115.59	81.53	118.31	68.49	66.42	101.34
CiPaw.05G182200.v1.1	24.5	29.34	31.19	269.54	280.45	375.72	225.09	266.68	227.1	284.41	292.45	234.29	244.23	113.67	206.11	127.17	104.18	100.92	31.96	27.57	27	135	152.2	175.88	98.68	103.92	106.82	87.58	48.84	74.21	74.12	57.45	103.13	36.9	31.02	38.11
CiPaw.02G185000.v1.1	196.86	240.8	156.69	566.07	626.62	633.57	415.29	470.78	301.65	299.6	189.03	243.44	294.54	195.67	324.21	84.13	230.27	173.42	310.14	283.38	239.05	241.68	214.5	364.27	583.36	515.18	494.15	358.23	286.13	228.1	249.87	181.77	301.52	450.61	269.28	290.27
CiPaw.08G037700.v1.1	230.35	214.11	227.71	27.73	31.26	11.25	121.8	120.59	175.65	230.73	212.07	254.46	122.28	294.28	229.13	132.94	184.09	150.66	403.84	352.41	277.29	194.8	243.69	197.61	367.13	671.5	454.84	599.13	510.46	635.27	310.35	101	270.69	184.89	175.75	195.58
CiPaw.09G037200.v1.1	153.44	179.79	158.87	433.8	372.2	358.45	352.06	339.36	343.62	386.19	408.07	378.84	261.67	243.76	237.1	178.9	237.67	221.03	181.4	175.71	181.97	363.61	359.05	330.63	295.24	275.61	274.93	213.05	223.59	239.75	200.11	212.59	186.74	289.3	267.23	245.27
CiPaw.08G031800.v1.1	208.62	226.75	230.11	471.95	490.37	459.75	377.34	400.85	383.88	406.94	390.01	418.86	333.35	293.65	310.05	220.61	266.13	249.07	238.33	204	198.68	425.99	488.79	422.89	360.36	374.47	336.12	288.73	283.9	297.41	246.66	282.73	234.85	328.04	344.96	279.69
CiPaw.10G157900.v1.1	19.2	21.97	17.99	469.27	294.87	324.57	802.2	426.71	726.11	336.4	379.08	545.77	227.08	82.07	49.05	21.6	70.42	58.75	41.27	46.14	52.34	118.33	111.11	107.13	109.29	134.52	166.48	241.53	226.23	154.88	82.71	219.07	138.28	54.07	44.85	46.43
CiPaw.08G054900.v1.1	0.53	0.9	0.82	314.2	192.45	293.61	461.58	347	547.19	275.87	298.74	307.2	31.43	16.64	29.53	21.76	34.12	34.32	3.2	3.23	5.24	159.54	174.12	163.56	105.5	111.69	131.92	97.18	50.49	100.32	24.01	88.2	25.36	81.51	57.99	32.11
CiPaw.03G248800.v1.1	285.41	262.59	245.75	88.04	105.31	51.98	207.86	179.01	240.84	394.98	536.75	478.11	261.43	408.85	276.8	249.48	310.43	323.38	338.38	332.37	350.69	181.11	197.17	148.49	304.86	501.19	355.21	423.53	385.74	380.57	276.5	183.33	299.97	225.14	208.72	274.71
CiPaw.10G095100.v1.1	272.56	235.67	272.24	96.92	113.94	92.46	88.99	134.39	145.35	168.95	153.63	208.19	137.27	121.55	130.01	147.81	105.7	89.44	173.82	142.92	127.93	214.06	250.56	332.68	694.33	775.36	762.57	666.43	907.39	596.59	282.58	89.38	291.02	89.21	155.68	274.23
CiPaw.13G068200.v1.1	356.32	391.63	427.77	75.2	72.51	93.95	26.25	42.44	27.44	137.18	158.09	134.99	301.81	192.25	315.81	274.58	178.73	219.43	89.1	102.53	156.02	119.87	106.26	73.08	117.73	139.34	169.32	239.83	167.47	122.89	228.38	328.74	261.58	274.33	193.21	258.54
CiPaw.01G214400.v1.1	254.19	207.29	237.09	78.53	127.96	105.28	184.26	244.88	237.3	262.41	311.3	257.75	226.83	299.93	254.72	530.38	239.9	300.64	395.15	381.02	339.46	350.19	373.68	351.97	326.69	394.34	417.71	288.96	354.82	312.22	215.25	160.7	248.22	160.1	158.18	176.33
CiPaw.03G246400.v1.1	234.9	228.92	248.05	258.8	236.92	311.09	163.86	207.55	146.73	331.99	253.43	280.8	623.51	477.65	722.63	474.01	379.99	401.65	32.66	33.97	58.57	260.23	288.16	282.57	253.59	261.01	301	349.87	244.47	223.25	398.36	507.78	447.09	458.21	385.18	433.74
CiPaw.05G040400.v1.1	92.1	91.97	87.86	265.23	324.97	234.79	221.13	211.54	227.64	216.76	201.94	197.38	529.56	408.95	583.62	165.46	205.78	349.83	151.05	134.64	144.36	221.48	244.64	236.16	136.97	116.33	131.45	157.96	214.29	157.1	382.45	371.77	569.94	237.72	293.29	371.09
CiPaw.02G076300.v1.1	268.31	178.7	153	0.27	0.42	0.74	15.43	5.84	5.4	6.48	9.56	3.82	23.97	46.46	31.16	84.99	137.76	175.38	221.21	254.35	225.67	124.75	89.42	91.38	38.86	41.5	31.74	65.58	68.04	38.4	584.26	916.15	528.04	1175.99	412.07	616.39
CiPaw.01G284600.v1.1	116.12	106.81	101.17	871.42	631.47	910.54	860.25	986.45	697.55	839.23	899.23	702.36	554.92	163.39	373.59	107.8	162.33	169.4	105.79	111.04	103.74	144.69	135.95	139.96	176.04	119.94	175.23	135.45	136.98	151.86	247.63	327.45	228.4	424.04	300.69	308.73
CiPaw.11G155200.v1.1	3.87	4.06	3.07	3143.07	667	5188.51	1644.16	1444.36	800.23	2011.33	764.85	887.01	456.16	94.08	169.56	75.6	116.76	175.56	3.48	0.81	3.42	24.21	25.71	65.29	94.41	77.22	63.05	68.58	43.06	96.42	61.94	63.55	68.83	63.07	117.54	92.36
CiPaw.06G102500.v1.1	507.34	439.02	433.28	365.21	439.3	379.6	762.41	649.3	733.93	673.94	776.72	750.36	733.89	731.69	684.18	677.85	626.58	653	620.29	665.33	645.18	561.52	731.81	752.54	669.35	693.05	661.38	779.07	934.92	716.09	668.37	589.21	655.28	381.69	430.74	418.63
CiPaw.01G217700.v1.1	269.42	253.65	273.61	4.1	5.12	2.24	4.15	7.79	6.81	12.35	13.39	12.44	41.75	134.94	61.94	199.58	106.1	114.72	206.39	363.4	423.81	35.17	39.51	19.45	18.72	40.57	26.19	90.73	127.9	80.99	111.91	169.84	175.72	85.94	134.98	221.22
CiPaw.12G084300.v1.1	132.85	193.13	191.57	4.36	3.87	7.31	7.61	18.25	6.5	72.28	54.59	71.75	220.66	146.3	240.29	84.05	74.63	95.02	2.2	2.94	4.39	31.44	19.19	14.13	75.51	91.11	122.53	211.32	108.32	75.64	226.84	462.89	226	255.51	148.37	155.52
CiPaw.02G038400.v1.1	496.45	487.78	534.31	522.46	658.2	647.09	664.58	711.54	707.33	545.04	499.04	539.18	401.62	459.37	439.41	423.3	386.89	414.63	546.17	530.49	518.53	485.93	507.57	543.41	579.93	581.4	660.81	498.95	398.36	475.05	366.6	347.69	344.54	509.35	396.98	397.96
CiPaw.07G057500.v1.1	175.5	205.22	162.76	517.09	494	447.5	379.05	345.77	361.43	374.4	366.03	354.89	283.27	240.61	252.71	210.24	273.02	236.51	190.7	201.93	202.61	460.45	444.75	396.13	318.58	312.67	305.07	258.72	251.12	248.07	212.42	225.87	225.55	344.07	298.08	279.75
CiPaw.09G062700.v1.1	206.51	225.46	184.31	109.61	94.71	85.57	11.69	20.6	13.53	69.89	85.26	86.85	294.83	262.67	323.11	244.96	196.35	190.34	26.63	35.28	52.57	244.7	120.59	82	95.1	114.58	142.15	158.49	113.73	87.62	236.11	402.85	282.97	233.48	158.22	211.34
CiPaw.07G129400.v1.1	185.94	166.43	165.91	14.95	22.7	14.2	11.63	15.25	13.65	28.23	28.78	33.7	100.32	205.69	133.14	168.67	210.22	193.7	252.46	244.78	248.65	106.94	95.07	87.24	113.74	105.25	112.02	93.04	132.43	105.44	256.2	149.33	235.93	179.04	192.13	264
CiPaw.10G162200.v1.1	596.33	613.13	657.99	44.36	37.59	35.24	82.58	112.31	114.67	82.41	80.77	69	90.49	131.52	87.11	90.08	60.76	60.35	624.94	520.95	465.97	256.12	254.61	216.94	219.02	280.44	279.02	139.4	344.61	147.61	114.97	45.9	124.04	34.82	35.24	108.21
CiPaw.03G037800.v1.1	103.92	101.38	104.27	673.9	570.03	792.94	512.88	630.83	499.51	562.22	608.12	533.16	355.42	337.86	365.76	220.88	231.96	260.89	93.93	88.71	87.21	266.7	274.8	218.85	270.16	235.43	318.06	318.06	269.17	326.62	223.97	249.44	221.03	199.04	201.92	208.04
CiPaw.13G031700.v1.1	12.94	2.28	2.05	204.77	157.83	178.25	238.5	416.51	221.23	143.43	131.51	142.92	185.93	108.17	181	108.1	141.5	96.46	15.58	4.17	9.28	123.54	66.13	133.78	330.07	727.71	418.19	231.97	139.43	328.3	231.63	83.68	299.15	284.28	199.93	114.73
CiPaw.06G076000.v1.1	309.81	380.12	323.66	28.82	24.72	36.35	31.7	46.13	33.37	94.04	135.16	124.57	274.72	109.34	237.25	256.43	162.07	198.48	4.54	3.56	9.41	59.14	67.95	15.31	89.23	69.13	90.44	202.24	122.76	96.96	161.91	237.92	138.41	120.62	127.85	111.57
CiPaw.06G112200.v1.1	246.91	289.1	261.65	737.16	665.85	652	552.68	559.39	531.02	468.94	509.06	475.62	463.17	439.22	462.39	354.39	431	369	254.64	247.04	231.69	492.65	542.17	477.33	452.71	402.53	384.23	332.07	337.77	371.37	366.57	420.81	343.26	382.27	453.36	371.52
CiPaw.15G014600.v1.1	260.21	296.46	276.12	606.98	637.11	543.09	430.29	441.3	418.13	463.22	503.15	464.95	370.45	340.78	355.88	269.21	322.08	297.68	294.8	271.94	260.19	521.82	533.89	479.94	440.09	415.23	383.97	359.6	368.58	360.65	326.04	297.64	293.71	331.45	406.32	348.73
CiPaw.09G114300.v1.1	706.49	773.93	862.91	16.32	23.37	18.93	24.9	46.51	26.68	78.11	69.45	89.95	300.27	177.81	293.79	257.7	213.29	255.7	8.43	23.63	24	19.87	16.29	12.73	50.04	55.35	86.18	165.79	105.67	62.56	186.89	296.53	222.6	142.19	116.28	121.43
CiPaw.04G078400.v1.1	154.85	186.01	168.58	38.69	37.5	39.99	32.36	15.51	32.5	43.74	30.74	36.55	107.77	112.23	126.28	280.21	195.52	202.55	41.25	104.7	206.79	255.37	139.57	100.32	55.84	85.98	110.88	85.52	62.25	53.1	124.41	466.5	182.75	225.07	152.6	178.54
CiPaw.13G146600.v1.1	417.43	401.16	468.05	852	790.04	914.91	716.01	773.54	780.74	584.36	622.09	627.6	564.81	670.13	570.68	534.76	522.82	538.73	406.46	406.32	425.88	555.98	474.82	513.16	594.73	482.88	500.77	564.25	469.08	616.05	524.9	506.12	457.78	397.28	510.82	390.91
CiPaw.16G012300.v1.1	256.02	289.25	264.81	52.1	39.71	46.11	61.03	97.57	55.07	98.15	92.3	118.57	285.54	204.68	286.48	155.02	181.48	117.81	63.65	76.97	77.8	64.56	59.31	47.25	179.94	193.98	265.53	186.8	138.63	115.25	288.36	253.37	296.53	199.98	126.47	179.16
CiPaw.02G190900.v1.1	138.02	176.19	156.17	180.19	182.77	203.56	585.4	464.78	511.25	359	409.86	521.24	445.45	284.79	374.76	241.56	260.72	229.22	33.07	38.14	41.27	108.85	86.04	71.11	211.69	268.92	288.93	249.67	166.9	181.84	227.82	330.92	212.75	178.6	116.73	224.28
CiPaw.07G081100.v1.1	360.03	347.04	358.54	279.9	316.78	338.49	461.99	531.01	492.82	434.72	481.11	477.9	462.3	440.67	463.5	618.38	333.54	396.05	512.92	508.27	517.63	381.02	422.07	391.87	460.91	433.14	489.19	400.4	511.27	482.06	334.52	298.57	342.59	210.44	262.99	322.01
CiPaw.15G083000.v1.1	113.64	99.91	108.49	206.54	191.81	177.55	22.91	24.02	31.73	27.89	36.29	34.16	205.83	267.6	211.06	269.85	131.49	239.68	175.83	200.86	231.73	262.2	207.19	176.81	62.47	93.98	65.55	80.17	107.6	114.43	199.59	294.97	289.37	177.42	95.13	212.9
CiPaw.01G171600.v1.1	0.36	1.82	1.7	623.08	466.81	595.94	169.71	223.6	156.96	221.92	169.08	148.71	113.61	57.39	101.94	65.83	61.88	56.14	0.14	0.57	1.7	219.9	207.63	260.5	90.54	78.72	74.84	107.56	52.51	161.61	46.61	130.56	52.94	25.72	34.11	32.38
CiPaw.11G070800.v1.1	189.31	148.67	169	167.31	166.39	155.56	258.08	337.37	346.52	292.87	254.68	284.36	124.88	121.27	126.96	149.17	141.59	143.69	223.74	198.93	167.11	267.89	271.3	330	507.75	595.75	602.5	601.57	585.99	490.92	188.63	68.89	201.37	95.36	109.2	182.68
CiPaw.06G103700.v1.1	272.12	290.56	276.18	365.26	353.06	349.66	339.39	327.99	338.03	336.76	337.96	349.12	536.52	602.38	547.68	308.02	527.45	498.42	414.96	415.31	375.29	323.05	355.49	398.64	499.5	501.49	455.43	464.2	393.94	401.17	656.09	643.8	518.7	689.03	508.81	455.98
CiPaw.10G023800.v1.1	221.2	214.68	222.65	372.63	362.15	378.31	443.59	467.28	446.42	329.73	384.24	369.54	270.96	240.18	253.76	262.29	211.13	233.39	341.19	350.87	331.2	334.3	352.44	339.37	354.26	371.57	325.88	255.35	268.79	245.26	180.5	172.16	173.56	129.29	118.46	117.74
CiPaw.05G033800.v1.1	101.08	151.88	129.19	77.01	66.21	70.99	80.12	85.18	94.59	109.06	127.36	134.4	303.48	487.99	384.17	441.74	482.82	587.78	48.66	52.99	66.14	155.65	103.39	132.06	175.93	99.04	149.28	214.41	131.36	188.53	345.18	480.37	387.57	328.04	289	292.13
CiPaw.07G013200.v1.1	224.14	197.32	212.14	5.2	7.06	4.28	16.39	14.12	19.8	21.21	23.15	30.65	79.76	175.94	110.02	280.92	165.72	214.65	207.11	180.8	201.27	42.02	47.15	42.79	75.41	113.29	105.8	90.86	128.91	107.09	122.37	52.3	124.5	89.38	98.94	120.3
CiPaw.07G148300.v1.1	351.32	313.4	314.36	258.99	281.75	304.61	424.26	472.19	431.09	473.83	432.42	462.22	262.44	289.68	284.32	347.28	269.24	276.91	356.88	354.38	337.75	354.56	351.64	346.44	453.73	445.54	496.49	397.26	388.12	440.39	282.34	200.93	290.52	263.84	246.49	265.71
CiPaw.01G064400.v1.1	292.1	315.64	279.11	46.31	59.54	56.88	54.65	108.64	76.72	184.19	200.76	220.53	367.85	254.51	352.61	372.82	265.81	253.02	103.88	91.17	103.69	266.4	187.46	136.12	215.79	213.24	219.29	248.47	193.23	217.38	302.25	432.23	349.96	262.4	267.77	282.53
CiPaw.14G081600.v1.1	37.34	35.16	39.31	16.98	18.6	11.48	154.96	23.31	111.84	95.22	47.96	89.74	142.69	38.3	100.28	19.42	56.79	58.01	176.44	156.47	136.3	275.96	271.47	244.04	66.35	71.4	65.51	263.74	143.09	163.62	224.66	132.44	405.23	219.12	218.16	304.25
CiPaw.13G003400.v1.1	438.33	452.87	460.27	194.07	215.92	234.9	270.69	395.88	327.41	399.98	402.16	419.04	474.95	367.17	459.86	392.35	366.54	353.67	110.19	117.24	128.11	182.89	182.24	147.62	272.7	336.69	367.87	324.7	245.03	263.12	334.4	386.17	363.16	386.61	267.67	333.32
CiPaw.06G109300.v1.1	0.15	0.75	0.38	369.52	401.15	337.07	142.1	227.03	219.11	221.79	204.86	170.56	93.35	47.68	114.81	34.69	35.43	38.16	0.22	0.15	0.95	200.17	258.01	290.01	135.31	124.05	116.76	88.87	57.28	98.13	34.5	33.03	33.67	28.82	54.08	19.17
CiPaw.08G006800.v1.1	174.1	169.54	156.91	248.67	256.1	229.76	181.47	173.26	175.11	143.57	147.66	122.57	247.25	302.64	234.76	195.08	324.73	281.07	375.93	370.63	372.73	322.66	356.85	362.12	222.32	221.3	179.13	173.77	183.81	151.52	323.26	292.09	283.19	320.99	343.71	276.11
CiPaw.05G150000.v1.1	208.23	193.88	234.62	34.53	24.26	35.72	35.94	70.85	41.49	104.35	180.47	169.51	222.97	168.57	280.29	185	140.94	145.42	12.99	18.52	18.75	35.73	30.24	20.09	117.66	128.42	176.78	87.11	77.77	60.83	206.68	248.8	183	171.41	110.75	137.63
CiPaw.09G055700.v1.1	244.31	258.89	244.74	204.78	203.33	159.62	427.18	327.44	452.49	284.92	273.65	345.03	492.03	386.17	384.05	335.17	313.38	409.79	214.25	278.65	312.89	183.11	325.72	414.66	221.93	230.83	268.27	96	106.11	122.53	276	261.48	188.84	134.69	147.8	151.59
CiPaw.04G098700.v1.1	177.62	198	200.81	10.33	14.83	9.56	23.39	46.42	29.1	71.78	56.23	73.65	208.05	210.81	248.81	108.2	186	122.77	45.23	43.43	45.43	60.42	60.48	51.58	115.06	153.38	170.29	118.27	104.81	94.94	218.6	179.66	191.95	203.25	129.84	195.97
CiPaw.05G229700.v1.1	143.24	133.23	136.72	353.21	336.13	369.94	289.3	324.93	268.18	348.63	339.61	342.03	251.33	229.83	213.53	208.75	189.35	181.87	163.59	147.3	157.74	339.65	296.76	315.14	268.86	270.94	296.01	276.73	327.11	282.12	200.21	206.66	181.24	197.69	220.51	169.25
CiPaw.04G007200.v1.1	174.33	136.65	170.03	59.98	77.6	65.87	109.69	177.76	196.91	239.99	216.53	239.09	152.45	157.26	156.12	140.28	121.36	113.8	79.49	70.11	69.14	133.13	127.72	158.53	426.95	433.18	473.23	340.57	503.23	292.15	224.47	68.8	238.55	72.62	137.32	131.55
CiPaw.05G243000.v1.1	83.68	80.85	74.09	205.68	252.09	201.33	240.74	253.79	265.73	317.42	274.12	297.86	156.57	120.12	133.53	118.03	111.77	125.12	80.35	85.4	76.28	369.91	355.83	293.43	260.2	228.93	339.26	237.42	182.22	215.61	137	194.73	170.06	243.59	173.9	171.8
CiPaw.01G294600.v1.1	159.13	172.46	179.32	460.68	458.68	437.89	339.91	352.85	346.17	344.21	379.87	342.84	316.9	261.62	294.08	212.44	238.45	219.86	189.57	176.3	184.75	372.27	413.54	375.31	297.14	294.75	273.55	233.5	241.69	252.78	226.35	235.58	207.78	222.09	276	241.7
CiPaw.06G011100.v1.1	99.63	110.99	88.25	12.64	16.42	9.59	75.21	54.52	64.81	100.62	96	146.78	179.21	237.72	169.46	120.87	225.57	193.94	252.01	233.69	239.38	72.01	66.14	62.58	228.26	237.22	237.13	258.12	236.27	223.93	252.8	219.91	368.59	219.47	194.54	354.95
CiPaw.01G007700.v1.1	200.48	162.43	167.8	53.03	56.16	32.39	64.09	66.35	75.34	110.21	119.66	111	204.11	338.82	239.05	223.28	332.72	381.78	155.81	160.51	175.13	88.39	107.86	98.94	201.88	186.53	174.3	153.99	175.56	187.91	297.28	269.78	262.47	276.65	305.71	354.85
CiPaw.03G169600.v1.1	232.13	175.46	143.67	6.66	26.14	5.09	35.62	32.53	42.91	51.43	48.93	33.66	78.8	103.95	52.69	340.43	236.32	278.52	429.98	446.84	461.81	182.75	171.02	204.72	82.73	135.9	133.01	121.38	122.42	88.54	90.68	34.78	63.82	132.58	111.52	159.12
CiPaw.02G006000.v1.1	232.33	264.72	243.4	72.52	70.85	68.04	101.53	147.23	105.93	191.39	218.55	228.53	306.19	180.99	221.34	181.35	125.99	133.46	47.8	38.03	46.53	112.19	100.47	75.83	236.17	275.78	333.55	261.7	191.36	174.1	189.44	169.19	256.33	138.32	107.27	199.74
CiPaw.08G079300.v1.1	497.23	498.62	531.74	135.95	85.88	120.19	695.31	493.97	560.22	247.83	353.14	349.51	363.26	145.76	297.75	160.79	144.41	131.19	79.35	87.02	69.6	56.55	46.19	41.92	153.19	191.42	216.23	150.86	127.77	106.69	160.14	185.86	156.72	112.94	78.78	116.76
CiPaw.04G164800.v1.1	14.91	10.85	15.08	127.66	97.05	160.55	348.67	632.69	412.35	491.77	455.28	443.78	249.74	182.8	242.38	156.98	129.64	172.65	10.98	15.9	12.6	29.28	34.32	29.35	146.45	55.83	138.35	118.37	73.59	162.2	110.23	133.83	130.42	102.66	109.44	70.44
CiPaw.09G194500.v1.1	116.07	108.65	113.75	201.35	217.17	213.19	201.85	178.56	184.31	105.3	104.72	136.46	216.42	293.92	243.22	292.79	343.17	321.03	341.21	361.88	352.08	193.42	255.32	316.47	279.42	290.39	266.37	192.68	170.07	159.02	320.26	344.89	289.96	239.22	191.42	231.71
CiPaw.03G169000.v1.1	64.61	51.82	62.25	260.14	275.61	229.44	1274.1	824.45	1561.79	383.35	659.64	617.22	13.32	8.8	9.17	81.47	101.2	104.5	107.92	120.05	134.61	179.95	193.95	176.31	117.46	156.13	159.16	80.08	133.16	97.1	11.54	13.64	10.76	50.97	24.34	53.9
CiPaw.11G111400.v1.1	335.57	332.21	320.72	105.12	109.53	106.51	87.97	97.05	86.61	135.75	123.95	125.33	201.15	239.47	214.08	301.02	298.96	299.38	254.5	263.08	290.23	139.88	134.34	130.05	124.51	119.66	130.92	170.85	174	161.61	228.25	221.39	239.65	266.05	231.27	301.72
CiPaw.03G209500.v1.1	176.53	193.74	188.07	516.13	487.46	454.54	386.19	346.92	369.39	326.35	330.09	321.13	301.93	279.85	280.49	203.68	266.87	236.29	201.07	178.6	185.01	451.07	468.33	435.02	374.6	356.01	347.04	289.21	282.37	295.24	249	258.67	224.01	366.78	317.26	262.77
CiPaw.09G074200.v1.1	0.25	1.02	0.78	1040.93	945.79	913.82	384.67	373.39	252.65	720.17	250.38	288.58	27.59	20.78	33.37	10.76	32.24	60.54	0.25	0.25	0.86	593.4	425.41	627.43	173.64	123.03	85.01	35.9	20.48	599.24	7.88	40.09	93.32	33.86	71.31	5.42
CiPaw.05G012600.v1.1	0.36	0.71	1.15	18.74	52.31	74.16	268.5	134.92	102.37	270.55	133.25	206.44	133.36	265.65	128.29	172.93	48.81	204.35	15.04	48.56	64.57	62.53	22.31	34.91	306.75	188.79	92.17	139.28	125.13	541.79	90.73	38.78	155.32	87.46	312.28	138.72
CiPaw.03G168500.v1.1	16.56	14.24	22.82	166.55	225.26	164.32	450.23	337.72	586.83	137.36	198.14	179.28	20.86	10.53	8.55	94.6	144.36	83.4	94.58	119.98	141.81	162.69	152.82	84.06	50.86	66.64	67.48	90.89	97.36	93.3	3.87	15.49	34.85	35.13	19.28	69.6
CiPaw.07G014900.v1.1	253.82	231.33	225.19	167.33	180.56	119.65	210.62	193.93	276.93	294.63	308.17	381.36	142.13	184.26	150.13	231.43	272.16	235.08	271.18	270.64	263.25	461.32	397.39	370.26	389.42	503.8	390.67	283.75	324.14	279.8	189.91	128.01	162.5	261.11	191.01	220.55
CiPaw.15G037500.v1.1	147.27	113.46	138.25	228.75	170.87	132.58	712.84	305.02	544.17	142.12	144.71	195.92	322.32	135.97	189.26	377.87	165.69	397.38	369.52	449.26	392.87	202.51	266.32	285.55	283.91	354.84	259.67	226.62	208.15	166.38	138.67	137.52	166.53	25.09	36.83	31.89
CiPaw.03G182700.v1.1	442.54	423.82	414.6	12.33	13.83	12.45	25.74	44.01	24.66	40.48	33.83	40.42	252.75	284.84	285.52	203.98	182.6	156.56	26.11	52.96	38.5	21.11	19.16	16.6	83.18	93.57	99.78	73.65	82.32	57.15	259.31	359.67	273.66	155.97	146.22	238.89
CiPaw.06G049200.v1.1	232.78	207.5	222.33	1.27	5.76	5.07	5.4	7.75	13.52	27.22	27.23	25.64	62.36	169.88	102.9	302.17	210.58	214.08	157.13	135.73	145.56	15.88	26.3	19.07	37.33	45.78	55.69	63.86	96.01	99.2	210.17	54.45	149.57	135.33	97.77	161.47
CiPaw.05G258500.v1.1	522.22	529.92	538.43	266.39	295.56	305.65	387.27	343.76	356.37	414.16	352.12	396.85	424.93	481.75	425.83	487.22	413.86	469.49	626.73	620.95	620.51	319.75	329	321.29	423.81	553.96	607.73	475.44	411.18	423.67	406.55	402.24	406.08	559.87	412.72	443.67
CiPaw.13G025800.v1.1	439.61	436.07	446.17	514.76	531.44	523.02	528.18	592.16	572.39	644.7	660.41	615.36	478.99	524.57	500.01	462.72	463.11	480.52	437.91	415.19	416.33	633.08	640.68	607.57	604.89	608.92	657.95	618.84	578.84	625.34	497.34	499.48	486.02	571.8	523.68	515.64
CiPaw.13G096400.v1.1	92.88	105.4	103.46	250.22	215.25	169.43	183.61	208.97	230.95	185.37	225.03	189.94	156.59	93.51	114.01	130.76	120.86	139.93	1.23	0.46	1.62	14.44	0.14	12.69	48.25	31.04	88.7	31.51	30.8	26.89	41.27	61.54	25.69	46.76	33.13	18.7
CiPaw.05G154200.v1.1	291.87	315.28	297.27	874.87	682.05	926.96	458.77	504.04	431.43	425.65	422.96	475.36	290.49	275.7	315.32	311.99	294.21	286.71	386.03	346.94	359.49	399.54	344.09	440.9	390.35	442.74	339.39	348.8	286.48	349.42	358.68	374.24	459.9	305.24	309.02	480.97
CiPaw.05G020900.v1.1	521.4	543.5	427.07	415.49	421.56	325.06	288.97	254.23	266.55	354.8	378.64	279.86	304.21	390.35	370.98	324.44	387.5	383.89	620.96	628.38	558.01	383.74	453.15	434.86	419.56	371.01	361.73	341.91	333.3	314.16	538.46	473.41	515.19	698.04	585.35	622.68
CiPaw.07G155900.v1.1	356.16	363.34	312.9	181.19	193.32	166.48	259.64	201	236.22	163.43	131.74	157.94	295.07	347.88	314.4	357.22	440.75	382.87	393.57	414.31	401.06	243.44	221.11	246.73	336.78	374.23	315.62	233.72	285.63	272.66	375.32	277.05	362.03	347.31	406.24	334.71
CiPaw.05G181700.v1.1	85.4	72.66	78.46	190.9	170.11	150.94	599.13	350.08	516.94	203.31	281.36	289.67	63.67	34.98	42.31	68.52	36.32	47.21	133.43	136.23	131.32	117.51	102.83	105.53	176.48	205.69	186.29	96.93	96.11	80.7	23.12	25.77	30.9	15.44	12.38	18.76
CiPaw.12G047300.v1.1	664.92	670.9	560.27	338.23	385.2	355.8	355.84	336.42	327.25	272.01	286.87	291.4	430.31	459.46	410.52	470.89	402.94	380.52	711.28	724.74	661.93	408.57	445.75	454.12	376.27	310.82	265.2	293.85	402	369.26	411.9	409.35	469.28	247.16	362.18	466.69
CiPaw.03G277900.v1.1	16.94	21.44	22.65	80.95	67.5	91.28	47.61	59.99	40.25	113.2	87.52	99.31	301.58	221.27	328.72	330.41	229.14	212.35	9.43	12.09	28.28	90.6	97.93	88.89	80.98	90.73	89.54	156.72	116.37	132.66	235.56	369.53	263.74	213.22	211.88	244.49
CiPaw.02G062500.v1.1	100.52	80.81	84.48	22.41	28.81	11.1	82.75	87.38	104.35	168.2	191.51	320.64	183.28	314.74	224.3	189.33	321.45	336.16	208.91	191.34	205.54	39.87	55.41	79.03	183.03	178.67	191.04	105.69	96.61	109.02	257.27	212.04	233.33	114.67	71.5	153.29
CiPaw.11G085700.v1.1	68.97	50.95	61.54	299.47	167.65	289.73	963.57	461.3	1091.23	470.58	540.02	651.72	14.15	19.28	9.84	41.04	57.28	46.38	61.31	65.09	69.63	150.93	128.92	114.04	209.41	212.39	232.68	159.98	200.56	166.94	44.47	54.62	35.17	104.4	69.36	76.48
CiPaw.05G152800.v1.1	882.79	919.32	858.99	756.95	738.45	764.99	761.07	669.63	711.32	698.43	727.55	706.92	660.75	681.08	656.5	593.15	676.5	628.44	1027.89	1031.56	938.12	837.47	826.21	807.95	780.71	758.58	693.8	749.44	834.96	780.26	782.4	741.91	775.13	811.35	692.52	784.28
CiPaw.06G070200.v1.1	290.64	310.82	299.15	518.73	483.8	449.77	422.23	476.06	463.2	553.95	550.69	522.38	366.75	383.71	395.57	335.55	380.09	369.33	288.5	303.53	323.41	488.62	483.94	442.07	458.28	467.93	482.45	450.47	411.87	417.99	307.05	318.22	313.7	564.01	425.36	356.48
CiPaw.03G162100.v1.1	214.02	213.8	239.55	18.66	29.62	20.84	103.31	182.11	201.28	139.4	97.95	143.84	127.7	187.63	172.19	103.93	124.94	108.01	330.94	254.72	231.71	75.91	82.92	92.37	314.48	202.66	206.89	232.84	306.02	323.99	218.72	91.31	213.4	112.44	249.65	146.26
CiPaw.09G217800.v1.1	10.05	8.62	9.17	407.19	370.53	313.84	190.07	322.18	230.6	364.61	313.13	230.71	413.49	161.59	266.79	119.67	347.66	286.98	15.88	12.37	16.57	120.95	111.06	163.2	237.88	126.43	210.28	159.43	131	204.87	157.43	126.69	146.99	152.97	224.62	171.89
CiPaw.16G027500.v1.1	198.02	283.06	275.66	20.01	21.28	20.81	15.53	30.55	15.64	62.71	63.75	72.49	283.28	163.6	254.32	108.13	91.71	115	30.3	31.81	34.78	41.34	33.44	28.73	88.09	92.37	117.12	229.27	124.57	92.83	192.03	349.32	213.62	156.72	124.57	172.24
CiPaw.10G160500.v1.1	166.92	174.8	149.13	65.44	64.74	65.29	40.65	51.63	38.3	76.53	80.43	77.42	217.06	230.11	227.76	193.42	202.73	189.69	86.77	98.47	116.86	78.33	73.9	67.33	107.76	114.39	141.18	222.44	150.52	118.83	328.28	334.13	336.01	403.47	241.09	288.89
CiPaw.03G141600.v1.1	240.11	306.9	230.26	147.69	158.53	139.39	168.96	135.94	121.34	89.08	98.84	92.55	100.03	102.03	105.36	101.75	174.09	134.27	342.93	348.68	261.8	166.95	178.26	200.78	252.04	188.53	206.64	200.59	220.02	180.93	293.67	359.91	251.26	406.6	246.84	317.29
CiPaw.01G105500.v1.1	305.52	286.07	284.84	497.35	478.32	483.63	588.83	503.62	495.57	773.03	677.61	680.51	511.23	514.1	528.24	591.26	798.82	838.24	437.61	475.58	539.17	540.89	532.73	513.92	578.7	431.05	571.14	790.66	612.54	724.77	427.2	297.85	458.17	528.03	453.28	482.53
CiPaw.03G106600.v1.1	246.43	279.96	307.09	132.2	193.69	150.46	247.06	286.11	310.88	300.62	268.76	312.68	267.38	251.38	300.56	129.52	155.02	164.66	99.97	91.96	68.3	59.19	136.97	113.24	166.3	274.32	168.03	163.56	130.21	178.94	169.99	116.54	163.51	140.88	105.87	99.6
CiPaw.06G102800.v1.1	488.56	442.81	399.07	17.38	15.62	13.95	13.95	50.05	24.35	71.71	54.58	64.97	224.43	128.93	160.9	193.94	175.36	168.06	30.59	38.38	30.5	26.2	36.85	24.27	148.64	152.37	173.31	104.66	81.54	62.29	138.94	120.96	164.49	113.7	74.19	134.45
CiPaw.09G104700.v1.1	573.96	636.58	640.28	27.15	30.47	27.49	27.45	63.6	40.58	114.37	124.89	142.28	399.3	177.34	324.3	193.07	143.77	159.84	79.65	87.98	93.44	57.75	49.38	38.32	148.31	126.98	182.94	203.24	197.98	116.88	273.29	360.95	320.45	171.45	161.49	204.72
CiPaw.01G047100.v1.1	127.5	113.67	108.82	392.44	342.05	431.13	602.95	761.64	634.06	472.19	494.79	461.64	385.5	208.95	348.18	193.68	200.23	207.08	109.7	99.61	93.06	142.37	147.09	164.05	281.38	187.88	232.64	171.11	179.33	223.91	189.67	190.92	217.93	141.4	184.13	182.09
CiPaw.02G142300.v1.1	231.58	228.16	213.66	434.66	445.17	387.19	411.59	434.68	427.34	428.7	428.49	424.56	333.42	322.96	315.66	283.25	292.25	283.85	262.49	267.41	278.25	464.69	530.67	464.91	347.1	352.74	334.09	328.36	277.8	309.71	239.26	254.1	247.64	313.91	322.43	266.67
CiPaw.01G084600.v1.1	130.31	137.18	133.11	1.66	1.53	0.74	4.54	6.06	5.92	4	7.03	10.76	57.73	171.97	85.89	189.12	141.28	144.39	405.29	413.04	429.12	51.23	31.27	39.28	91.43	147.87	100.86	95.55	111.86	92.84	163.83	90.92	215.52	231.26	152.99	128.51
CiPaw.11G039700.v1.1	318	328.26	323.53	288.8	312.64	305.39	194.34	260.87	219.3	267.34	244.46	260.94	395.24	444.45	395.99	402.81	490.32	443.35	388.48	413.62	411.05	388.79	442.88	443.95	374.31	371.77	356.84	363.48	362.77	342.83	485.91	474.81	482.26	455.14	421.02	459.37
CiPaw.11G182100.v1.1	199.98	277.79	278.05	23	20.97	22.55	17.2	25.59	12.35	46.2	39.53	55.28	254.55	220.39	277.72	211.85	203.62	183.11	46.02	54.52	82.99	33.63	27.33	18.71	70.49	73.45	106.23	132.27	81.16	61.43	287.63	475.84	298.75	207.44	152.76	286.12
CiPaw.11G174100.v1.1	17.25	19.17	21.99	386.71	272.4	409.39	288.21	242.53	256.98	180.57	226.23	201.57	91.24	77.78	98.14	170.3	158.6	157.09	11.58	13.7	19.74	149.27	107.73	90.71	48.74	54.48	49.26	70.09	62.66	79.53	62.48	122.32	68.33	82.85	79.65	94.17
CiPaw.09G011800.v1.1	610.09	605.93	599.72	69.66	70.37	71.23	89.09	108.4	102.91	113.59	128.02	122.62	249.88	231.07	278.95	277.53	213.85	268.64	148.98	146.15	137.85	92.79	94.41	104.38	156.69	165.28	173.61	180.15	184.04	132.15	223.23	245.47	294.89	216.32	206.48	232.07
CiPaw.16G037400.v1.1	290.59	283.28	280.55	58.79	84.52	69.85	104.72	160.04	126.97	160.56	143.09	181.3	219.01	235.98	258.02	218.55	128.11	149.22	23.2	21.97	26.73	65.07	61.4	53.84	237.3	289.35	353.92	228.09	178.93	193.89	205.47	176.51	259.7	172.91	153.84	187.6
CiPaw.11G031000.v1.1	96.14	104.86	76.12	10.33	12.56	10.81	59.58	54.48	55.56	85.11	84.39	82.44	102.98	140.1	121.53	254.47	187.54	199.65	405.25	427.74	423.94	387.81	337.44	360.53	257.56	223.16	211.83	130.1	183.43	166.94	146.06	82.13	163.92	138.24	118.58	287.44
CiPaw.04G094500.v1.1	311.24	288.06	295.88	78.84	83.76	72.17	84.48	93.82	84.99	116.66	102.07	96.18	105.27	136.59	108.59	143.98	145.43	155.95	349.7	338.37	331.49	313.25	256.64	251.01	193.81	198.59	218.08	207.8	228.78	176.67	156.42	140.96	160.39	215.93	211.52	178.61
CiPaw.07G040200.v1.1	294.96	320.9	234.35	87.38	84.31	62.07	102.06	74.65	87.37	91.34	100.97	129.04	99.48	148.51	113.18	97.32	196.84	165.7	274.19	279.01	263.62	67.03	66.87	86.74	173.02	164	138.28	149.01	189.61	134.11	378.03	466.27	368.81	620.88	335.3	464.66
CiPaw.01G280400.v1.1	175.03	171.65	160.66	41.71	52.1	20.19	67.25	83.79	99.31	80.14	71.09	90.64	95.73	247.41	148.94	106.97	243.62	210.39	147.38	131.85	138.94	252.95	206.53	243.34	279.73	225.09	200.09	213.25	235.89	279.85	210.68	192.66	201.68	257.68	336.46	282.42
CiPaw.10G038500.v1.1	6.94	10.08	8.41	254.22	218.26	334.57	44.96	112.37	48.88	242.38	198.37	202.08	401.81	210.96	439.01	107.26	135.11	102.4	2.81	3.32	9.07	80.81	94.56	83.41	131.41	142.14	144.69	165.56	86.16	114.7	213.98	379.44	186.58	188.1	189.35	174.96
CiPaw.13G040100.v1.1	182.53	194.81	178.29	375.35	372.86	369.52	339.39	368	369	317.26	346.96	330.31	280.79	274.74	278.49	228.35	213.68	213.66	203.97	206.61	204.17	389.09	437.73	370.61	306.47	245.98	260.93	225.82	266.75	267.13	198.28	200.6	194.75	155.06	226.53	208.31
CiPaw.11G180500.v1.1	214.15	193.42	218.09	291.27	270.93	284.81	253.06	316.83	297.97	304.68	344.51	333.47	234.38	170.54	205.53	189.87	173.94	180.16	241.08	210.36	207.6	289.04	322.1	270.47	164.82	172.12	192.5	119.37	134.54	139.6	143.07	146.99	165.25	119.83	129.75	129.39
CiPaw.13G110600.v1.1	236	202.3	179.82	0.12	0.25	0.37	10.31	4.32	3.73	4.85	9.55	4.52	25.08	33.09	28.34	53.18	115.26	136	394.48	441.05	352.79	71.53	63.97	67.81	25.97	38.58	23.13	74.58	72.2	35.06	381.26	547.75	416.68	1132.54	311.33	526.01
CiPaw.02G151000.v1.1	234.95	242.85	239.4	448.37	464.39	383.73	621.45	466.18	539.66	545.21	504.36	564.02	726.47	507.1	569.89	376.67	393.68	511.5	502.04	537.5	510.35	424.35	553.12	552.59	525.35	633.21	469.67	545.1	491.36	420.12	430.23	552.73	389.33	227.86	234.75	189.31
CiPaw.06G083200.v1.1	130.78	159.39	146.75	378.11	363.29	324.3	331.74	321.18	327.63	314.83	329.69	306.71	256.19	221.09	242.36	184.07	202.15	185.8	162.58	155.86	156.21	365.1	384.11	325.56	273.16	278.85	255.66	221.12	226.26	228.61	194.29	192.11	194.14	221.84	253.4	197.09
CiPaw.08G074800.v1.1	765.61	761.56	772.1	206.5	225.41	161.11	406.33	408.59	419.56	468.08	523.55	528.82	412.93	516.08	416.51	657.19	501.15	613.12	701.82	696.34	740.4	475.11	478.43	426.14	431.99	479.13	522.09	475.23	518.83	511.61	476.05	433.1	464.46	542.6	598.28	543.07
CiPaw.02G143000.v1.1	274.87	291.73	308.57	495.86	490.39	451.77	464.52	479.25	462.63	457.44	495.86	429.6	381.96	367.19	398.62	304.69	330.58	329.63	382.11	370.73	331.7	485.27	541.64	457.86	412.3	425.96	405.15	376.32	401.26	376.69	305.55	317.6	326.27	378.96	447.46	349.75
CiPaw.01G085500.v1.1	78.04	76.75	72.68	152.26	193.53	202.59	85.92	71.05	68.29	67.15	50.83	58.98	118.91	208.11	145.03	224.65	207.55	153.32	192.78	210.11	264.99	196.91	142.29	222.8	68.71	81.6	75.35	96.6	90.44	133.17	151.23	358.91	151.44	194.7	254.37	196.46
CiPaw.11G081400.v1.1	166.51	178.33	156.06	398.08	395.52	356.04	347.21	317.44	325.69	315.82	337.61	329.57	259.58	222.38	235.47	167.96	197.35	198.51	186.61	179.83	186.18	360.48	358.24	343.14	286.75	260.66	252.28	246.35	245.67	256.34	202.18	200.2	201.78	211.31	248.32	209.69
CiPaw.15G113500.v1.1	167.15	198.67	164.42	487.41	472.33	425.26	360.81	366.82	335.08	337.17	336.65	341.05	276.31	280.45	305.59	197.51	276.14	240.16	183.9	173.66	165.98	351.4	356.39	362.96	310.07	288.6	234.25	257.93	261.43	273.4	219.89	238.46	211.51	222.2	288.21	255.27
CiPaw.05G065000.v1.1	424.9	346.42	339.5	212.7	201.42	208.04	92.61	120.29	98.64	182.35	188.43	140.53	136.84	141.15	139.42	136.47	147.07	146.15	413.42	373.41	403.28	360.3	353.83	340.43	200.81	195.41	183.73	205.86	268.8	262.66	178.74	183.89	194.82	200.49	325.18	230.21
CiPaw.02G173600.v1.1	162.63	173.61	145.87	41.11	51.28	27.66	45.52	74.5	58.59	104.02	77.04	104.45	293.16	270.61	272.23	190.04	221.34	229.28	61.4	59.17	62.59	34.79	41.1	43.31	107.72	110.43	122.18	112.61	105.56	91.33	240.7	220.39	291.84	191.77	159.31	259.12
CiPaw.03G279000.v1.1	170.13	130.72	147.09	108.95	119.05	100.78	139.59	182.01	188.22	226.64	229.01	280.18	225.19	214.67	213.39	240.06	173.65	176.7	133.23	124.7	124.27	98.06	98.96	127.04	291.98	342.68	306.73	548.16	590.29	511.32	256.57	88.76	284.66	111.95	191.91	293.89
CiPaw.12G043100.v1.1	7.89	8.34	5.77	460.52	383.42	502.83	690.1	659.66	665.22	424.29	469.19	432.26	71.55	30.84	53.47	16.57	31.17	23.16	8.69	7.13	9.49	113.26	101.35	109.51	117.76	105.12	119.95	145.45	89.32	155.24	34.89	29.79	35.26	33.36	37.05	25.7
CiPaw.02G116500.v1.1	178.72	205.56	185.24	475.34	430.74	420.54	403.11	388.57	392.41	363.27	381.89	357.31	322.57	286.78	287.32	242.3	292.4	248.8	217.48	199.26	211.37	400.95	408.75	357.63	323.32	327.92	318.57	274.74	257.76	274.72	255.44	281.12	238.76	373.5	344.3	264.56
CiPaw.13G099600.v1.1	62.8	81.68	44.32	171.56	155.74	116.1	333.97	236.98	314.2	312.68	498.81	543.62	282.47	268.6	253.76	71.77	150.53	149.74	77.07	84.35	76.71	139.82	133.33	137.21	319.77	184.4	219.33	271	221.82	233.11	174.96	132	206.24	207.45	176.95	234.18
CiPaw.05G022700.v1.1	17.17	8.17	4.72	354.77	148.19	389.49	530.49	866.2	371.75	2231.82	2328.22	1820.87	1290.72	212.8	232.38	77.15	108.7	157.94	4.19	2.51	2.69	43.5	13.66	56.95	17.6	22.43	17.79	45.3	29.41	65.53	28.81	128.14	50.54	80.43	94.45	49.22
CiPaw.11G069700.v1.1	437.01	428.2	394.27	331.48	352.67	295.41	421.9	396.81	425.4	278.37	308.09	301.05	349.7	357.88	351.79	461.9	416.06	426.36	594.83	648.33	569.28	365.89	426.56	509.2	397.02	355.07	306.56	255.59	379.52	290.35	347.53	372.18	352.69	187.24	203.56	210.21
CiPaw.13G064700.v1.1	282.96	315.49	297.54	625.69	609.96	578.03	475.3	446.23	426.66	399.2	425.19	422.4	368.1	385.41	376.09	300.37	400.42	353.9	280.86	261.87	283.5	511.6	536.19	510.04	428.48	438.73	389.72	318.04	367.48	363.06	325.39	324.48	282.45	389.1	422.2	337.86
CiPaw.09G211800.v1.1	43.65	45.06	37.19	268.4	167.77	174.22	633.81	325.05	658.14	252.4	329.97	433.9	106.34	58.18	35.64	35.89	61.29	42.73	53.23	68.29	75.15	107.34	100.07	95.13	153.43	170.99	207.68	188.96	296.26	130.6	63.46	128.38	95.56	43.05	37.01	43.49
CiPaw.09G119100.v1.1	276.63	308.81	315.41	33.08	46.63	39.86	30.24	50.89	34.18	55.74	63.48	79.02	253.98	192.18	248.75	190.1	270.52	171.58	158.68	166	151.9	93.03	95.64	76.97	118.79	98.95	150.78	111	136.44	105.32	234.85	157.8	252.07	142.39	109.68	199.58
CiPaw.03G022000.v1.1	214.03	330.86	232.11	0	0	1.58	3.03	2.41	2.21	8.26	3.9	3.97	115.34	548.59	98.68	242.04	179.84	259	2171.19	4795.05	4680.25	90.29	23.39	74.76	26.03	65.18	51.45	13.75	60.78	124.46	355.72	46.82	196.26	44.9	43.45	34.65
CiPaw.07G166600.v1.1	4.58	4.6	3.76	188.61	169.16	190.12	221.8	148.67	210.56	224.83	243.91	221.33	62.48	44.75	65.39	123.48	115.32	115.99	8.66	13.47	22.67	215.57	174.38	173.58	99.49	105.94	105.32	104.64	74.78	116.62	45.71	61.11	50.92	105.55	78.46	72.13
CiPaw.03G022500.v1.1	251.65	162.75	150.77	0.21	0	0.44	0.79	0.83	0.83	1.08	0	0.21	80.87	255.5	38.72	64.03	47.41	62.45	697.88	1208.35	895.6	31	22.44	64.07	36.7	59.53	58.38	19.72	123.75	141.06	151.93	40.34	119.93	89.44	107.93	83.86
CiPaw.05G053800.v1.1	167.32	160.13	160.84	258.01	266.89	268.31	293.1	327.82	306.26	436.83	412.29	421.33	306.14	305.64	309.33	250.49	204.48	222.84	272.09	273.87	271.11	434.71	513.06	449.72	401.78	342.59	408.23	374.92	325.17	376.97	225.49	187.62	240.84	199.18	214.06	247.18
CiPaw.07G068000.v1.1	0	0.65	0.5	475.94	376.8	625.56	339.18	242.93	197.59	313.62	201.05	198.62	183.43	64.25	120.04	40.41	27.39	22.54	0.16	0.31	2.19	207.04	221.13	223.24	46.1	56.45	41.21	102.73	28.63	117.7	24.59	155.72	35.66	39.69	23.19	5.09
CiPaw.11G149400.v1.1	194.98	211.39	193.98	455.01	501.08	452.9	634.57	472.73	545.19	397.03	379.54	429.63	645.3	544.02	559.1	441.81	395.35	480.16	345.75	384.33	407.53	498.69	590.64	648.82	498.99	473.91	390.63	512.95	406.76	481.88	428.69	436.42	378.26	305.32	285.41	310.91
CiPaw.02G127800.v1.1	39.31	42.03	41.13	325.84	329	294.75	240.06	218.51	227.8	210.26	214.35	204.24	216.84	124.23	154.13	77.62	81.37	83.29	67.61	66.98	71.25	260.17	370.63	293.91	181.77	185.62	166.72	127.6	127.33	109	92.55	112.44	92.07	75.17	78.74	67.95
CiPaw.02G182100.v1.1	531.78	576.55	572.32	500.4	467.18	476.74	421.99	421.02	462.77	393.95	400.37	450.82	418.86	531.25	461.24	599.05	580.05	578.98	680.14	651.31	646.54	501.16	513.74	463.42	468.32	452.36	443.6	470.56	558.77	574.79	538.78	599.34	544.45	514.02	613.72	560.22
CiPaw.02G110500.v1.1	201.28	233.88	214.95	382.96	391.22	372.04	411.1	385	404.63	352.99	394.78	382.12	302.16	289.69	289.29	221.59	245.57	240.52	250.9	224.73	218.08	396.3	453.06	396.42	355.49	334.95	299.6	264.58	273.36	287.81	255.97	295.9	236.89	277.1	349.71	264.77
CiPaw.04G141000.v1.1	130.65	153.57	142.98	386.18	426.77	325.33	318.77	302.08	317.2	220.09	225.17	231.58	290.4	255.07	261.87	159.9	191.44	171.93	261.85	266.96	252.09	413.52	444.63	472	367.59	377.98	307.98	249.32	289.59	236.35	249.66	215.22	238.71	156.87	184.36	196.93
CiPaw.09G043100.v1.1	347.01	343.01	338.93	207.08	220.79	218.67	134.31	174.25	148.37	151.43	154.18	136	166.14	268.82	208.76	268.25	290.98	279.93	317.14	285.54	306.39	362.56	321.42	350.58	245.93	272.59	226.87	190.15	187.8	171.76	320.94	332.01	293.07	326.96	327.44	272.16
CiPaw.02G132800.v1.1	5.79	5.31	7.01	158.96	151.06	154.74	304.63	176.15	306.34	208.56	230.08	249.94	92.07	40.75	30.35	98.09	65.51	75.41	12.8	16.79	21.46	200.81	208.56	163.5	78.51	86.66	92.64	60.18	76.32	83.04	19.81	54.72	42.31	15.17	34.98	26.4
CiPaw.10G141900.v1.1	110.97	197.97	163.84	27.47	22.45	37.36	25.49	41.74	21.54	77.34	72.55	80.91	355.35	178.64	316.66	240.98	197.77	140.64	17.68	19.46	26.64	58.42	70.65	18.87	75.9	82.5	92.03	158.86	80.04	52.57	255.43	419.69	210.93	179.48	102.39	181.33
CiPaw.02G173200.v1.1	146.64	132.25	119.5	107.91	141.65	133.19	53.69	80.92	69.56	133.98	83.86	56.17	85.98	182.51	135.02	112.8	274.47	234.69	127.08	125.07	146.18	600.92	435.15	529.16	199.02	126.01	130.23	222.46	195.83	260.97	262.71	405.41	231.81	525.42	503.75	361.57
CiPaw.01G294500.v1.1	277.43	284.3	263.93	583.15	554.15	554.23	476.9	461.13	476.68	401.85	446.56	411.73	398.32	359.76	377.48	329.43	335.08	333.37	285.99	298.26	294.64	468.14	468.6	474.97	391.61	390.67	346.77	313.8	351.08	344.96	289.99	292.65	307.56	313.71	363.35	294.4
CiPaw.01G141400.v1.1	40.8	47.2	45.91	534.48	599.95	613.4	235.29	250.42	229.11	214.51	213.66	176.82	138.19	106.66	148.59	65.12	54	65.15	63.3	52.37	53.87	323.69	348.66	322.1	193.93	247.79	223.82	97.85	94.76	84.16	93.68	85.48	82.04	48.82	33.36	26.15
CiPaw.13G075000.v1.1	283.84	330.38	343.03	11.93	14.36	12.66	7.24	29.66	11.63	76.16	102.51	100.89	221.34	115.49	224.93	135.52	90.17	104.75	9.07	10.97	12.02	44.45	34.44	22.57	96.03	108.29	146.56	162.12	128.03	74.12	142.7	203.5	156.9	125.62	93.35	121.17
CiPaw.05G008900.v1.1	187.16	241.16	246.01	7.94	10.55	8.51	20.23	46.98	22.85	66.15	54.06	79.61	210.46	133.97	194.75	98.95	130.33	91.75	12.29	15.83	15.1	18.82	16.62	10.58	70.14	105.62	121.65	96.86	63.84	49.72	155.88	168.5	127.58	140.31	94.48	122.29
CiPaw.09G123100.v1.1	233.43	228.5	226.41	285.9	323.89	253.44	405.25	381.67	402.93	291.86	297.7	309.8	318.15	325.97	324.72	329.12	302.48	323.76	536.07	494.28	448.66	374.35	414.61	466.17	503.71	583.88	457.52	388.83	413.71	312.22	345.49	333.82	336.16	271.62	216.57	198.77
CiPaw.03G225900.v1.1	479.27	443.91	475.43	136.03	133.58	137.75	193.4	263.91	253.56	207.14	190.64	242.2	225.78	312.51	248.77	346.6	314.3	354.66	414.05	402.42	377.43	237.13	224.59	217.07	318.13	313.11	329.19	256.66	299.51	339.87	247.36	207.54	275.79	188.74	218.8	252.94
CiPaw.03G251000.v1.1	194.43	186.2	182.14	329.99	287.61	337.46	357.61	389.09	352.47	325.69	337.5	356.09	292.17	220.78	255.88	149.34	141.52	146.43	129.01	129.78	129.6	185.49	153.99	149.1	226.99	195.42	210.75	175.54	203.43	251.81	134.32	115.9	133.9	83.39	120.96	136.72
CiPaw.09G197600.v1.1	1.58	1.61	1.73	46.67	44.09	30.96	168.25	170.95	143.63	132.66	107.51	81.53	70.08	58.5	113.7	33.52	56.37	68.19	0.7	1.04	1.47	42.89	24.5	26.94	217.31	102.01	148.98	248	189.19	341.09	146.96	90.55	208.14	122.76	340.3	110.1
CiPaw.16G031000.v1.1	32.76	35.31	25.7	242.13	221.51	260.76	591.77	441.12	512.27	274.63	348.68	303.81	60.58	91.23	89.24	47.15	67.73	68.33	62.11	53.47	48.04	147.33	108.98	117.13	202.38	145.93	181.83	154.9	157.74	184.23	96.64	56.15	89.93	123.74	70.87	106.61
CiPaw.05G105900.v1.1	254.14	236.69	265.12	129.87	98.9	90.61	460.42	248.2	317.48	57.62	74.99	51.97	46.71	28.75	25.31	46.77	35.61	68.25	424.27	487.22	417.06	108.06	129.42	144.17	101.69	133.46	120.71	23.21	23.13	23.83	25.53	16.52	21.56	14.23	14.55	16.98
CiPaw.05G202600.v1.1	0	0	0	197.43	0	395.13	49.18	213.45	100.57	132.84	162.03	411.2	112.63	105.44	370.07	195.16	42.78	49.93	0	0	0	129.3	125.5	0	102.72	121.25	61.52	54.64	0	0	0	316.12	50.19	0	54.89	154.09
CiPaw.07G020300.v1.1	247.58	234.17	242.16	61.31	64.17	58.15	43.11	74.44	55.37	94.04	90.97	88.85	192.3	195.62	197.38	188.85	219.27	170.01	61.6	77.51	79.04	95.1	86.54	72.85	113.67	128.61	128.57	143.81	132.83	132.75	189.87	159.49	197.91	190.05	179.99	216.06
CiPaw.06G113700.v1.1	166.93	246.14	208.19	237.68	179.66	255.89	109.01	152.73	120.9	173.31	176.72	228.3	529.38	211.76	426.53	299.83	241.86	200.86	18.73	39.85	57.89	133.17	146.6	89.45	119.7	145.33	184.14	213.65	109.13	109.23	243.26	430.45	244.32	204.12	154.6	208.4
CiPaw.13G034000.v1.1	239.9	307.47	302.84	19.73	17.46	34.11	16.25	46.86	18.9	112.05	91.18	84.29	187.11	101.83	252.45	172.63	96.48	99.19	9.78	12.97	7.64	43.47	44.79	24.1	119.63	78.58	129.47	186.8	96.82	74.89	164.95	170.33	148.76	144.15	114.88	95.92
CiPaw.04G021000.v1.1	12.95	12.75	10.96	208.62	134.99	160.35	393.14	247.31	398	209.1	257.89	325.56	107.41	35.32	30.79	19.21	32.33	28.26	10.51	10.28	11.72	81.13	69	76.99	112.13	119.43	146.3	132.59	156.34	118.52	35.58	62.78	50.91	17.08	17.22	17.04
CiPaw.03G031500.v1.1	246.02	260.61	306.84	36.83	57.78	53.72	41.15	73.15	47.49	113.3	98.22	120.78	238.86	173.03	233.26	190.23	163.23	115.6	20.06	29.19	36.29	28	29.53	32.46	106.03	147.38	162.96	112.31	90.76	91.78	160.65	188.11	140.85	133.31	120.18	138.3
CiPaw.15G070900.v1.1	207.37	234.69	229.18	59.77	46.81	54.81	65.65	97.18	66.53	107.76	154.78	162.09	390.86	192.36	368.03	143.68	138.29	136.72	65.51	77.49	86.61	68.2	82.32	54.36	153.86	141.73	175.5	134.51	135.38	104.82	314.07	320.43	342.98	111.85	160.54	288.04
CiPaw.01G227500.v1.1	195.37	209.28	180.3	477.45	424.5	418.34	355.92	386.15	362.91	397.9	420.24	398	312.4	244.14	278.02	172.78	259.61	225.94	188.03	172.21	172.99	371.9	427.46	368.26	275	247.14	236.15	227.88	194.81	218.37	192.85	234.31	197.87	258.41	248.88	230.17
CiPaw.08G091700.v1.1	156.97	221.98	201.64	5.36	5.1	4.95	33.27	31.15	19.62	41.59	47.63	63.74	228.71	151.83	177.53	123.42	95.09	97.46	5.19	6.45	5.12	6.45	7.8	2.94	64.2	86.35	96.83	96.5	64.9	60.96	155.71	228.51	136.77	98.77	60.84	118.75
CiPaw.07G143400.v1.1	293.42	293.43	291.97	75.01	106.45	70.92	90.87	116.35	100.21	159.54	143.25	154.25	158.33	226.24	190.85	181.82	236.55	211.74	232.8	230.66	215.47	161.35	155.82	151.44	235.78	246.65	264.52	257.09	229.03	229.54	276.1	207.92	258.58	291.11	258.05	308.7
CiPaw.16G006700.v1.1	269.36	281.78	305.34	171.31	190.86	144.25	249.33	201.36	244.76	165.26	159.79	177.49	325.97	288.44	292.28	252.61	202.5	235.29	388.54	385.48	384.23	308.22	330.8	394.98	267.37	311.45	277.64	219.91	236.63	171.25	252.31	245.72	245.73	134.79	139.87	122.31
CiPaw.04G068000.v1.1	295.07	366.76	317.18	13.65	7.36	11.66	30.48	56.33	34.06	92.01	131.07	143.93	254.29	89.99	155.73	111.17	100.75	88.86	2.43	6.48	5.29	42.24	20.03	8.18	103.47	88.86	150.01	148.55	79.42	53.36	113.59	169.65	109.95	164.63	39.9	66.29
CiPaw.02G166200.v1.1	343.28	374.47	318.19	91.09	85.37	67.23	241.52	232.99	272.09	278.6	228.52	314.81	289.42	229.4	247.73	303.34	231.02	281.8	382.54	378.22	333.32	133.56	137.4	150.67	298.49	269.82	323.64	287.47	276.96	234.12	158.91	166.63	220.23	169.96	118.22	256.19
CiPaw.01G245500.v1.1	1.89	1.23	3.58	744.49	554.5	890.79	1000.73	1148.85	691.37	948.8	1075.87	728.19	469.77	162.52	317.25	122.37	73.8	82.06	1.52	2.57	8.23	65.78	102.18	66.13	29.52	23.1	43.26	33.76	22.12	48.57	25.53	118.72	38.46	20.21	23.37	26.03
CiPaw.06G006900.v1.1	296.94	314.06	306.38	348.1	375.6	382.84	453.19	492.83	481.1	443.86	473.27	484.18	341.78	310.86	300.99	333.54	275.33	315.73	417.24	411.51	379.31	412.3	395.85	357.93	410.64	425.05	418.6	336.29	337.56	355.07	266.43	254.12	273.38	323.16	287.93	282.18
CiPaw.09G169500.v1.1	211.03	192.65	172.92	289.94	293.65	256.3	171.43	160.71	175.84	214.35	184.9	176.06	164.25	200.9	177.03	219.64	305.23	289.63	241.34	230.43	223.56	392.23	366.12	419.42	228.93	202.23	201.27	235.13	244.81	273.72	396.71	583.21	351.09	622.39	452.89	438.83
CiPaw.01G206100.v1.1	104.13	106.25	114.71	316.64	362.37	269.74	276.93	240.4	255.34	220.39	221.72	233.31	250.82	174.67	194.43	118.53	130.41	137.91	202.14	204.52	192.87	330.28	357.54	379.75	260.87	296.99	237.21	222.87	209.99	174.71	159.83	164.63	147.59	123.6	120.66	101.38
CiPaw.01G055400.v1.1	166.88	190.87	209.12	11.71	13.15	23.47	33.09	47.45	33.92	50.06	101.05	92.26	207.87	150.52	300.35	208.43	112.43	142.2	4.15	3.42	3.46	19.98	34.16	15.08	53.82	46.92	59.64	91.18	61.08	40.57	133.02	295.71	153.71	92.57	111.12	175.05
CiPaw.15G162400.v1.1	7.17	4.03	7.84	390.96	412.52	407.56	168	187.5	162.12	199.41	136.75	117.46	146.44	86.44	118.37	80.34	72.78	66.39	4.41	4.09	7.91	334.09	284.44	415.98	147.31	128.45	157.92	185.88	110.15	252.16	133.42	222.73	130.22	144.06	143.96	117.84
CiPaw.04G185400.v1.1	84.18	0	0	0	108.31	49.39	0	53.36	100.57	0	162.03	102.8	56.31	52.72	0	65.05	0	49.93	109.77	99.43	137.33	0	62.75	56.64	0	181.88	184.56	0	165.8	180.09	132.86	0	100.38	139.62	0	0
CiPaw.04G019200.v1.1	27.17	25.81	21.06	363.79	284.74	320.27	236.68	219.56	259.68	168.77	192.59	185.51	45.79	28.01	31.92	84.35	86.26	72.6	89.15	111.63	125.83	183.73	162.54	149.61	142.36	161.2	183.57	166.06	156.13	132.25	40.21	45.76	45.84	75.16	67.4	95.97
CiPaw.06G135000.v1.1	459	388.94	375.65	187.14	179.57	181.38	190.04	270.38	230.25	399.67	414.63	349.09	246.78	307.16	282.04	279.94	251.16	268.85	340.48	318.26	320.37	364.06	316.75	291.16	275.01	288.33	303.24	438.54	510.43	548.27	317.22	206.91	329.74	299.67	435.24	486.76
CiPaw.09G180800.v1.1	361.47	335.16	358.98	206.05	236.39	246.49	306.48	356.83	373.63	521.98	433.1	484.44	423.85	388.64	391.68	278.56	274.17	311.06	389.79	386.76	430.15	405.78	352.06	389.03	385.38	361.44	391.78	544.18	563.23	526.91	331.96	297.65	380.63	197.94	259.74	244.84
CiPaw.07G231800.v1.1	452.95	445.24	414.41	223.91	169.96	261.17	360.8	446.18	392.42	387.37	363.14	359.4	384.42	401.73	407.26	384.45	387.37	364.99	572.52	583.69	568.76	314.12	302.5	329.04	504.49	443.56	498.37	415.55	386.17	481.9	344.62	246.34	354.86	321.34	328.95	357.33
CiPaw.03G068300.v1.1	87.21	81.31	88.33	348.23	243.56	332.69	504.4	499.26	616.5	336.97	371.06	441.96	104	114.6	117.21	142.21	157.18	137.7	78.73	70.11	76.13	128.17	138.76	135.12	226.43	210.99	234.43	183.04	250.14	178.08	105.71	70.47	96.28	119.37	152.97	94.39
CiPaw.01G122100.v1.1	135.93	146.47	128.73	457.05	436.4	395.31	304.51	322.85	306.2	330.53	336.79	305.82	247.57	187.65	232.54	134.85	183.86	165.68	139.94	131.96	118.5	338.37	340.38	295.82	252.38	224.06	217	181.79	172.2	182.95	153.78	163.25	162.68	191.71	196.68	184.48
CiPaw.05G203400.v1.1	127.75	100.75	118.94	80.88	43.16	37.89	162.76	58.5	119.17	298.53	305.26	326.46	168.64	48.27	137.15	98.39	94.92	101.35	235.2	240.19	177.97	183.63	211.61	296.68	115.26	165.37	123.92	786.81	422.55	392.02	163.98	90.69	192.96	32.92	55.92	41.99
CiPaw.05G152300.v1.1	334.14	348.56	339.36	372.19	422.66	413.11	534.53	558.34	537.65	394.92	336.88	377.95	404.59	370.76	388.62	264.16	272.05	281.82	382.14	414.09	426.12	272.13	269.92	265.18	403.14	380.33	391.31	305.68	319.61	433.38	292.18	272.33	302.02	180.57	292.1	231.8
CiPaw.15G141700.v1.1	82.93	77.05	88.65	404.16	347.31	400.78	277.8	309.23	300.37	253.02	247.82	239.01	230.74	198.03	225.32	159.73	183.77	178.4	53.07	52.32	58.78	117.51	187.94	159.6	148.88	211.12	159.34	127.92	129.26	158.09	119.01	109.38	99.22	116.14	188.81	130.69
CiPaw.10G161600.v1.1	126.42	202.37	191.77	13.32	12.6	20.58	7.77	21.55	7.02	74.41	89.84	89.08	271.51	99.05	224.96	122.77	53.17	94.49	11.96	11.73	13.25	23.02	25.19	17.48	56.71	62.15	84.9	166.15	96.03	70.55	117.14	201.17	137.01	118	84.34	103.07
CiPaw.09G043800.v1.1	561.15	441.54	423.4	163.76	160.55	160.44	289.52	262.53	350.41	295.92	315.76	289.81	361.9	385.54	317.08	701.57	556.9	577.54	305.67	360.15	480.85	301.93	254.36	232.27	245.85	255.34	246.95	276.9	296.23	296.69	247.78	332.57	383.83	323.57	356.21	411.48
CiPaw.01G138500.v1.1	135.73	130.76	121.26	263.59	284.64	292.54	110.02	126.28	123.49	141.44	105.32	96.33	99.5	172.62	136.12	137.12	204.57	167.39	147.74	147.91	163.62	344.98	333.24	394.25	209.43	172.76	188.72	212.12	191.98	239.53	242.12	257.98	210.16	357.66	365.88	327.33
CiPaw.11G057600.v1.1	489.13	413.25	465.4	16.14	21.8	12.38	44.3	83.07	60.91	106.76	129.22	112.76	119.79	230.22	223.62	271.64	135.44	135.68	79.51	62.85	49.55	81.8	45.02	33.56	105.5	155.42	163.54	55.74	20.79	35.26	208.99	133.55	167.4	145.43	147.06	24.09
CiPaw.12G041800.v1.1	266.38	304.34	334.14	5	3.65	2.65	13.48	30.85	16.37	52.25	53.64	72.17	136.18	123.7	167.16	167.81	116.1	117	1.02	1.11	1.56	8.85	16.12	8.32	59.38	69.71	73.85	89.17	68.37	72.48	128.02	255.42	112.46	80.54	87.74	79.34
CiPaw.10G122000.v1.1	638.49	629.62	661.33	626.9	597.42	639.45	510.64	665.8	596	626.71	729.16	631.08	980.97	746.42	879.24	797.98	759.18	667.42	633.4	651.42	689.69	548.43	639.18	525.27	558.52	482.07	575.53	517.72	530.38	518.45	711.84	658.07	753.45	577.33	611.5	612.09
CiPaw.04G040500.v1.1	346.38	380.03	352.02	526.67	582.44	512.63	366.71	355.9	345.28	334.42	319.95	311.15	353.87	416.06	368.03	301.92	395.6	355.36	426.48	422.96	408.57	513.31	538.85	508.73	449.45	449.84	414.26	366.73	358.88	372.87	449.72	524.39	423.13	497.39	489.6	433.4
CiPaw.01G228600.v1.1	52.35	42.22	57.4	300.09	265.99	401.04	519.46	653.22	521.44	463.1	427.48	369.89	256.97	83.89	222.51	93.58	80.59	105.57	43.27	33.72	36.39	105.98	142.6	138.63	163.79	120.86	158.06	86.77	107.93	117.3	63.66	43.09	76.43	56.78	46.86	94.29
CiPaw.01G097600.v1.1	83.58	99.3	76.03	137.83	175.92	108.48	197.33	196.29	172.27	217.5	218.91	198.03	87.74	48.32	94.5	57.67	82.96	98.42	185.29	187.42	231.34	177.88	207.46	300.34	228.47	178.1	161.02	139.81	81.72	127.25	51.08	69.62	50.99	45.8	41.02	22.11
CiPaw.01G097500.v1.1	83.58	99.3	76.03	137.83	175.92	108.48	197.33	196.29	172.27	217.5	218.91	198.03	87.74	48.32	94.5	57.67	82.96	98.42	185.29	187.42	231.34	177.88	207.46	300.34	228.47	178.1	161.02	139.81	81.72	127.25	51.08	69.62	50.99	45.8	41.02	22.11
CiPaw.08G123100.v1.1	216.23	226.71	229.1	14.97	27.88	14.02	27.29	24.62	30.12	29.27	30.56	40.93	54.33	87.58	62.09	86.96	125.73	114.17	210.38	201.77	184.47	149.75	99.33	90.95	89.15	117.24	113.74	123.18	174.59	170.38	127.83	119.54	159.05	138.58	123.97	172.25
CiPaw.03G090200.v1.1	177.38	187.45	184.76	451.09	447.43	414.09	340.68	335.99	313.69	282.99	300.51	285.83	270.9	252.54	253.21	172.77	222.25	205.16	204.46	190.76	185.74	407.03	460.96	371.17	295.33	316.35	268.01	249.04	249.57	243.34	197.12	238.47	204.11	269.76	291.37	231.22
CiPaw.07G198500.v1.1	147.07	186.6	174.72	313.13	293.89	282.91	313.71	301.98	303.83	367.52	371.33	368.33	232.89	211.6	223.32	145.81	191.09	187.81	151.65	146.86	137.65	296.91	334.23	316.23	298.97	293.71	283.62	241.03	214.7	252.85	191.48	194.9	154.35	254.06	247.33	223.15
CiPaw.02G088500.v1.1	277.36	226.78	246.72	183.3	231.12	155.38	305.7	415.45	446.06	397.27	354.39	354.06	403.1	405.75	468.91	755.82	740.33	751.68	317.72	293.4	275.32	246.84	245.54	303.64	307.69	262.77	245.02	290.23	254.61	273.56	238.97	295.31	231.92	385.82	441.56	302.34
CiPaw.09G040500.v1.1	229.81	270.69	254.54	111.73	110.53	122.25	108.03	129.06	100.09	149.11	143.74	166.1	363.62	251.68	285.19	279.1	282.61	232.97	89.41	104.61	114.97	117.63	119.34	115	150.66	162.46	204.96	239.56	159.6	157.22	235.71	256.73	259.96	218.78	186.48	248.37
CiPaw.12G097400.v1.1	330.24	389.9	388.94	21.68	29.22	21	35.78	42.54	36.3	52.65	58.26	74.71	219.35	165.81	255.71	198.21	169.28	185.41	36.24	41.97	45.47	29.48	29.73	20.74	87	59.98	83.2	86.75	100.57	69.48	216.12	223.57	237.68	132.98	120.55	194.94
CiPaw.11G052400.v1.1	323.99	378.14	274.18	96.3	135.58	98.31	232.5	172	175.21	157.2	145.48	152.14	141.91	123.95	166.1	68.77	163.72	123.44	401.9	405.37	314.46	127.35	125.02	157.28	238.04	204.52	207.83	249.21	245.12	188.76	188.93	132.92	188.56	333.41	245.58	270.49
CiPaw.01G174900.v1.1	22.98	24.8	24.04	67.79	80.65	88.71	111.14	159.3	110.48	163.1	151.61	144.33	226.38	174.35	286.78	70.64	89.52	86.71	18.05	18.68	17.95	26.37	34.63	33.83	80.63	56.07	81.86	96.08	65.06	76.69	178.45	146.54	194.12	119.92	97.27	144.89
CiPaw.05G015500.v1.1	178.82	200.32	196.72	75.54	106.55	101.69	60.29	68.97	60.82	78.43	64.09	71.17	191.87	263.65	209.34	269.18	268.02	216.29	154.65	182.34	217	121.85	169.45	130.92	81.5	89.03	88.13	128.83	128.07	125.34	206.12	293.47	197.64	191.96	224.28	270.98
CiPaw.04G186500.v1.1	5.46	9.43	5.66	129.23	136.06	154.48	10.79	18.45	12.83	50.43	53.84	42.57	127.11	133.97	135.39	248.3	187.99	112.41	6.13	10.86	25.3	313.12	229.61	158.75	35.48	78.89	45.1	64.33	25.77	48.7	87.77	383.81	111.98	130.07	103.87	155.47
CiPaw.10G072000.v1.1	86.09	87.18	75.41	89.86	79.86	69.77	49.32	15.34	40.78	31.31	38.34	22.81	26.07	155.29	95.08	105.4	125.44	157.57	256.71	231.66	298.13	185.44	160.41	89.04	61.15	43.01	34.65	28.77	23.84	30.14	137.5	176.64	91.65	151.04	199.49	187.54
CiPaw.15G128700.v1.1	296.42	261.63	273.52	7.1	15.56	14.27	17.93	21.64	27.03	38.13	42.78	34.55	87.89	210.55	128.69	427.65	277.15	281.17	107.05	88.3	96.13	18.97	23.84	28.44	20.69	26.08	34.3	54.63	72.09	88.37	162.17	38.64	100.54	147	114.1	186.16
CiPaw.09G194600.v1.1	26.46	28.89	27.53	51.63	64.28	72.13	52.49	57.3	71.48	93.73	59.32	109.59	155.77	207.83	175.38	177.21	375.79	305.35	46.44	54.87	74.28	95.86	86.01	114.46	216.12	125.07	111.03	128.98	111.19	123.04	192.12	383.69	161.07	282.74	330.45	328.96
CiPaw.05G137400.v1.1	267.24	218.61	232.45	423.57	387.05	431.61	467.08	269.5	359.23	229.37	345.99	236.4	166.35	166.5	181.71	190.28	220.38	179.96	256.74	228.26	219.47	118.08	115.5	96.49	118.92	156.33	135.12	77.46	79.95	100.23	153.15	123.76	152	184.86	139.83	126.5
CiPaw.07G178000.v1.1	173.9	154.02	143.28	126.57	159.8	156.07	125.77	104.62	116.9	158.51	105.25	106.17	101.02	173.96	135.65	110.63	213.6	185.08	115.02	110.34	108.01	311.88	264.87	374.5	200.51	167.64	189.32	210.63	207.38	258.81	308.33	459.56	272.7	559.83	408.09	338.04
CiPaw.08G058100.v1.1	8.27	7.71	6.28	171.08	115.81	121.21	181.93	289.25	313.88	281.24	314.21	358.75	43.56	40.35	37.28	23.92	47.1	21.49	34.7	25.84	26.92	72.35	82.62	84.51	187.78	171.91	153.82	176.13	251.08	176.65	46.47	22.01	30.75	44.53	59.26	88.09
CiPaw.15G047400.v1.1	165	179.06	139.54	19.32	26.16	11.82	31.44	25.62	44.06	29.02	54.09	40.27	61.38	216	114.92	54.89	213.74	186.28	165.62	148.32	175.23	336.48	286.05	279.4	198.9	154.62	144.14	158.39	160.55	203.15	199.19	211.57	160.26	376.51	509.49	278.31
CiPaw.06G003700.v1.1	69.09	110.22	123.74	49.78	99.14	66.88	77.03	99.11	69.8	165.96	194.91	232.83	414.99	230.98	361.58	329.29	233.53	248.73	24.16	33.34	37.04	93.66	67.34	94.16	80.77	92.45	127.61	135.62	112.45	118.7	218.11	478.97	290.85	175.71	206.13	354.42
CiPaw.01G085100.v1.1	136.94	116.9	131.07	0.4	0.7	0.17	1.15	1.09	0.64	1.39	2.13	3.73	28.43	74.35	39.39	109.73	95.26	80.87	140.71	119.4	123.77	7.91	5.4	4.85	39.05	80.79	55.89	31.67	72.99	40.45	115.2	71.82	139.03	98.86	116.93	72.59
CiPaw.09G080300.v1.1	92.25	79.81	93.85	71.95	86.65	92.17	104.49	157.56	163.4	151.51	141.56	164.78	147.12	172.96	156.97	132.02	104.54	116.86	72.9	53.84	47.1	151.1	145.84	164.85	388.39	359.02	351.33	477.78	480.01	434.85	209.92	73.34	241.17	86.51	132.41	231.51
CiPaw.12G121100.v1.1	249.08	203.45	162.69	15.67	11.34	9.64	17.52	16.43	17.83	17.51	21.02	29.02	45.77	91.12	59.3	114.63	150.74	149.55	236.29	223.27	220.42	88.3	58.76	67.83	60.27	59.96	49.68	56.08	74.56	57.5	297.16	383.03	281.27	362.14	260.17	334.85
CiPaw.03G023000.v1.1	193.51	136.02	162.29	0.97	0	0	0	0	0	0	0	0	16.78	96.99	18.58	65	38.35	62.55	902.16	895.52	348.08	53.79	4.88	11.53	20.28	54.49	41.48	89.28	255.95	256.24	101.38	47.99	173.5	160.23	176.26	189.71
CiPaw.07G178100.v1.1	247.76	220.39	221.72	61.23	73.17	56.38	123.53	144.23	161.45	169.78	213.11	211.17	81.09	161.38	106.17	99	96.55	95.67	221.36	191.31	172.94	136.92	126.39	123.4	284.35	283.75	263.07	170.9	248.05	204.34	156.11	91.07	147.62	91.37	122.24	132.89
CiPaw.05G074700.v1.1	17.56	11.85	10.5	226.36	241.91	271.27	537.8	339.42	463.19	241.09	240.87	267.96	66.98	70.17	60.84	116.09	72.85	98.37	100	94.58	88.35	135.2	125.03	115.16	146.73	132.7	157.66	113.18	133.81	141.26	49.68	37.79	48.02	59.34	52.02	43.77
CiPaw.03G072900.v1.1	51.33	34.42	44.56	64.53	73.03	58.03	440.78	140.6	302.11	188.82	144.45	219.78	297.65	101.18	229.34	78.46	115.72	150.54	152.14	166.24	177.64	151.61	129.13	152.14	78.46	70.84	66.33	156.13	75.18	91.93	181.05	124.62	235.92	45.12	62.51	65.75
CiPaw.03G269600.v1.1	238.78	233.24	217.96	562.39	556.62	516	435.73	418.06	441.66	395.05	410.55	381.38	404.2	337.38	343.57	287.98	320.87	308.26	341.18	310.09	332.87	549.41	558.76	553.88	425.78	412.85	385.24	345.1	351.87	340.31	273.89	257.93	277.52	328.57	381	404.44
CiPaw.02G021200.v1.1	55.89	78.97	61.8	7.06	6.4	6.36	10.65	33.69	11.75	54.7	51.31	63.75	248.39	122.97	179.61	88.53	99.86	98.1	2.26	2.71	3.39	21.63	28.45	11.89	65.54	80.45	96.06	142.17	82.23	65.91	157.52	210.85	176.11	120.27	122.85	227.08
CiPaw.01G216300.v1.1	84.15	151.72	104.6	40.13	51.13	58.63	33.49	40.96	32.9	69.87	34.41	41.57	209.75	337.16	200.69	559.88	526.63	452.48	76.77	107.59	169.62	105.43	80.25	70.48	60.03	80.05	66.94	117.38	51.91	77.29	320.1	628.54	316.29	372.52	395.56	421.63
CiPaw.06G139200.v1.1	17.77	16.46	15.88	237.51	175.37	209.39	528.42	342.85	550.93	255.04	320.39	348.45	15.69	17.98	13.64	16.06	14.81	19.3	27.67	29.6	40.2	116.06	103.78	108.03	140.11	150.94	177.86	93.65	124.14	114.07	12.58	12.79	16.86	7	5.16	8.92
CiPaw.13G135600.v1.1	214.81	180.08	235.15	429.5	449.99	497.56	236.48	393.4	332.62	406.8	385.93	372.56	365.8	312.18	322.21	281.54	230.68	222.64	253.14	239	274.75	337.45	374.68	295.6	222.62	271.86	306.11	185.63	184.53	227.53	257.9	181.26	201.63	258.14	218.41	181.9
CiPaw.11G046100.v1.1	290.69	242.1	288.36	93.8	93.5	84.63	103.61	147.56	165.71	163.96	146.47	156.24	102.67	110.62	105.97	141.05	102.52	89.79	190.77	154.96	146.85	156.33	164.13	207.12	460.54	434.75	452.7	532.66	592	534.49	227.88	84.75	211.46	92.74	141.52	192.25
CiPaw.10G004800.v1.1	207.84	233.07	233.71	364.29	402.53	305.28	237.66	244.75	245.65	252.97	271.07	257.73	209.17	250.88	229.26	164.95	230.48	227.17	243.05	227.87	224.36	512.08	484.81	465.61	376.84	337.18	330.43	317.9	344.6	363.01	318.28	341.96	299.53	323.85	377.48	321.01
CiPaw.07G023300.v1.1	194.33	215.32	187.43	463.91	416.55	405.89	331.94	362.42	355.89	321.78	345.79	346.51	300.19	266.09	273.09	257.04	270.65	248.16	205.97	216.99	219.8	399.56	410.29	362.09	264.26	273.74	276.89	224.28	246.55	241.15	216.93	237.93	211.09	303.87	320.47	250.5
CiPaw.02G006500.v1.1	154.02	142.73	136.63	553.58	502.36	580.28	253.41	311.3	262.98	262.72	247.07	229.93	212.11	176.99	204.46	203.96	249.09	224.58	71.22	61.57	72.65	612.76	492.04	497.56	202.56	195.08	155.76	182.66	181.43	199.85	185.94	158.73	184.76	262.56	368.66	266.3
CiPaw.05G241400.v1.1	250.2	234.56	233.76	42.07	47.44	33.78	71.56	90.03	84.02	87.02	82.24	82.11	168.67	203.36	161.43	209.56	191.14	216.58	218.8	230.74	236.42	104.39	98.85	99.77	148.66	125.85	143.16	121.1	159.16	131.31	165.85	112.44	197.87	87.14	137.67	174.28
CiPaw.03G205400.v1.1	375.37	433.43	345.54	337.77	434.38	251.87	169.85	226.68	214.72	267.16	225.49	255.49	183.6	247.09	206.33	144.49	275.01	236.63	457.32	450.32	393.21	213.5	320.15	322.55	337.02	276.25	296.28	300.16	259.88	264.52	249.27	172.91	259.74	338.08	243.22	353.19
CiPaw.09G194900.v1.1	211.13	250.52	229.45	5.68	7.88	5.75	12.03	16.2	10.31	29.25	24.77	29.66	178.34	181.63	226.06	170.91	156.23	180.33	47.72	30.94	48.49	21.45	16.27	12.9	68.32	60.54	72.19	73.01	47.6	38.02	184.74	293.37	224.16	139.3	112.4	166.38
CiPaw.09G079800.v1.1	194.03	193.1	166.33	33.67	44.19	18.33	53.52	50.82	70.13	46.89	66.63	61.17	72.11	237.23	140.12	83.6	227.14	182.41	160.79	150.51	160.54	318.83	232.66	295.61	296.93	244.45	217.34	225.06	236.87	280.29	220.01	203.84	179.19	312.67	439	220.23
CiPaw.13G119900.v1.1	295.6	327.91	331.66	574.2	565.36	497.07	436.71	447.41	436.42	427.39	455.45	444.98	395.62	372.28	363.54	340.91	335.62	318.45	318.17	318.98	329.5	595.12	631.86	529.15	423.01	396.85	389.07	312.31	371.08	369.4	326.5	308.85	323.03	321.15	390.42	314.94
CiPaw.02G080100.v1.1	214.83	254.05	237.31	32.71	30.44	34.24	27.15	47	22.35	83.99	88.39	95.74	166.52	102.57	167.33	128.89	100.58	80.44	18.13	24.68	25.65	62.79	54.51	35.12	87.27	107.81	148.12	146.86	80.14	70.37	142.58	229.85	156.83	140.14	106.36	143.16
CiPaw.05G190400.v1.1	157.73	149.97	157.39	32.46	40.93	28.6	26.61	28.74	39.39	44.13	50.62	49.16	80.48	138.2	93.9	250.67	276.86	232.91	143.28	139.31	146.82	103.97	94.75	77.86	63.49	70.93	79.53	96.87	106.42	105.3	182.53	239.55	145.14	309.53	216.62	268.94
CiPaw.03G121500.v1.1	186.45	178.94	173.53	15.27	23.7	15.16	15.73	16.02	16.11	7.21	9.62	15.27	38.85	91.31	48.81	55.15	94.72	67.38	193.01	179.11	173.39	96.51	142.19	119.21	99.8	130.03	129.45	73.17	92	42.11	133.51	64.59	65.59	82.89	79.3	33.52
CiPaw.04G144500.v1.1	60.93	73.55	64.93	68.22	90.92	78.9	28.17	22.84	27.7	33.44	28.42	28.38	124.21	182.94	129.15	298.35	276.62	213.23	109.16	136.62	150.96	124.24	99.78	101.35	38.76	51.72	45.39	80.58	51.54	68.1	183.57	348.25	195.48	247.79	231.98	325.45
CiPaw.09G021400.v1.1	52.13	77.65	83.57	98	51.66	102.39	60.9	98.2	62.65	161.17	139.27	199.88	372.52	176.99	355.98	213.5	215.68	135.34	0.46	0.7	1.34	55.33	66.6	33.66	133.72	165.28	185.51	159.3	96.42	99.62	175.77	255.2	160.66	113.18	71.34	134.01
CiPaw.09G095400.v1.1	19.5	24.78	18.3	178.19	141.66	187.77	132.51	149.61	136.55	187.78	149.92	180.36	323.54	202.6	371.81	185.37	221.94	202.11	3.41	2.14	4.03	94.99	98.51	80	107.56	112.34	123.64	176.07	110.83	112.92	234.1	294.92	270.47	220.11	205.19	217.55
CiPaw.05G012700.v1.1	100.45	86.99	112.38	59.24	22.95	90.77	62.11	157.7	76.14	283.66	281.85	364.13	660.08	158.38	443.54	140.47	253.53	192.25	2.08	6.01	9.96	38.86	58.73	19.65	92.69	123.36	190.46	220.46	76.48	117.7	127.64	253.58	110.52	140.92	79.85	32.2
CiPaw.08G051600.v1.1	53.41	44.26	62.06	23.67	38.09	48.02	83.11	113.86	118.52	74.36	70.52	87.81	93.75	149.46	89.72	76.21	43.74	50.18	123.55	102.34	67.57	166.89	121.95	152.62	325.98	455.63	385.36	393.77	447.68	473.42	192.34	193.06	208.3	117.02	151.05	173.94
CiPaw.05G186300.v1.1	233.66	246.41	219.5	405.2	360.23	379.87	330.44	368.34	363.74	438.52	413.46	403.22	337.4	282.87	308.22	267.91	294.89	295.89	257.59	255.2	268.5	358.68	401.43	353.39	345.87	340.66	342.21	265.63	258.28	211.25	247.2	205.05	230.95	327.78	292.26	248.61
CiPaw.09G140800.v1.1	67.84	45.6	74.09	106.56	126.57	122.68	207.05	289.15	225.44	334.65	398.21	305.86	254.03	129.49	211.46	347.54	253.13	263.21	2.96	6.18	5.7	29.45	28.37	48.2	30.13	37.8	53.96	21.3	14.25	31.88	21.34	71.72	18.08	75.19	25.45	38.41
CiPaw.02G122200.v1.1	128.19	142.13	138.19	387.7	371.9	331.33	294.81	297.78	290.97	285.7	288.75	285.17	216.96	186.3	212.54	155.1	179.15	159.43	155.58	140.5	151.07	332.65	376.76	318.57	257.24	251.18	244.58	208.8	199.9	201.68	161.96	175.71	157.74	191.58	206.45	173.88
CiPaw.06G002700.v1.1	41.28	38.21	40.68	225.51	230.1	195.26	204.81	176.11	203.45	180.1	196.9	203.35	130.24	137.7	103.57	66.85	83.65	81.54	52.95	49.59	48.22	195.04	191.13	164.51	207.73	177.42	219.19	231.16	226.91	242.37	127.61	128.54	139.31	71.93	110.81	108.63
CiPaw.01G306500.v1.1	232.79	217.71	158.38	133.06	175.66	205.89	84.48	94.53	70.08	118.24	68.57	90.29	125.57	170.87	154.91	315.6	173.6	246.81	106.47	93.72	117.68	149.59	207.73	188.35	151.46	213.97	154.36	143.27	118.14	92.31	224.09	274.5	214.96	295.34	139.47	358.89
CiPaw.03G236100.v1.1	5.96	5.98	3.45	564.64	440.76	547.33	279.23	176.04	160.25	246.08	318.43	276.33	157.67	88.75	106.84	64.33	40.02	40.46	9.22	11.29	14.95	148.76	124.42	133.93	49.02	74.24	54.17	95.01	43.12	101.27	58.07	101.95	60.39	77.82	40.03	29.62
CiPaw.10G092700.v1.1	173.75	180.5	171.66	341.43	333.94	332.04	259.51	299.72	273.57	295.28	298.62	308.59	247.61	203.76	231.92	164.64	219.54	187.74	184.9	165.63	159.22	325.38	318.41	296.02	261.09	258.64	264.31	201.11	197.13	216.86	175.65	189.75	182.34	239.63	250.21	189.52
CiPaw.07G058700.v1.1	260.61	316.47	326.54	29.02	28.9	30.63	14.39	18.46	12.87	25.55	25.45	28.6	130.37	169.5	151.01	180.81	130.83	174.07	77.8	85.97	144.36	51.07	39.38	32.69	31.72	35.42	42.03	93.32	64.76	57.08	131.37	163.99	154.33	111.43	131.89	130.14
CiPaw.10G066700.v1.1	47.86	41.04	44.49	185.33	115.91	161.47	307.58	300.93	322.67	325.08	360.7	361.72	179.12	139	179.61	130.06	92.38	103.97	65.33	66.48	58.35	121.46	124.6	101.95	192.7	121.6	158.6	138.66	139.82	187.32	117.52	106.64	139.67	62.42	71.57	89.59
CiPaw.03G086900.v1.1	92.52	74.33	54.16	0.2	0.62	0.2	2.8	2.05	2.19	4.55	5.79	7.86	64.68	132.85	58.04	93.59	38.81	43.3	275.51	297.77	234.19	98.57	125.42	93.02	134.73	59.34	100.05	91.64	206.67	253.91	62.24	21.35	133.86	60.53	88.29	74.86
CiPaw.10G121900.v1.1	401.01	429.95	414.45	612.2	646.6	637.14	521.23	513.85	495.7	451.16	445.92	443.27	522.12	488.09	506.19	469.43	505.84	462.99	398.06	390.76	378.19	372.73	424.77	401.75	383.28	358.45	315.58	308.55	329.71	325.19	374.5	408.55	333.81	413.96	406.08	319.84
CiPaw.14G017700.v1.1	160.36	169.37	178.06	361.39	327.38	329.68	338.05	313.9	307.11	290.36	304.12	285.6	242.08	229.28	236.96	157.19	207.84	181.91	171.95	170.49	167.08	292.48	300.79	261.65	269.62	263.02	253.39	210.34	209.64	220.94	202.03	213.66	188.12	230.42	253.58	225.2
CiPaw.12G116300.v1.1	540.12	565.61	514.56	725.85	740.81	755.87	517.83	496.56	457.4	401.22	355.85	412.64	494.77	619.94	491.47	515.12	526.48	547.81	652.15	629.81	641.21	716.04	687.02	783.6	537.49	546.63	481.5	411.93	488.59	485.1	539.75	597.45	491.43	540.08	586.23	512.57
CiPaw.10G151500.v1.1	18.15	6.25	10.17	135.15	125.25	114.91	133.85	194.85	148.18	254.18	164.99	210.19	497.56	286.98	417.72	433.14	605.72	540.69	35.28	37.1	32.7	134.36	147.15	218.26	141.63	154.51	136.73	141.52	156.53	172.97	136.57	260.18	311.23	118.47	204.01	145.04
CiPaw.06G104000.v1.1	162.79	155.31	137.42	375.68	366.53	348.79	455.31	410.68	409.5	380.42	374	390.55	514.67	360.18	445.83	240.74	314.64	307.24	276.35	296.97	283.56	400.55	456.56	515.03	413.73	364.25	340.28	338.25	308.97	273.72	377.51	358.94	376.14	248.36	265.05	301.03
CiPaw.02G122300.v1.1	129.16	145.93	140.77	401.36	370.42	350.33	283.93	296.98	293.5	258.68	296.09	266.77	219.24	193	209.13	146.52	179.88	168.62	132.52	125.05	115.8	348.19	371.92	332.65	259.56	228.47	215.19	201.11	206.34	209.53	185.01	190.44	185.36	204.03	230.57	213.4
CiPaw.08G162900.v1.1	333.31	389.25	387.69	29.11	31.9	28.02	74.63	54.63	58.54	87.18	83.86	92.73	180.51	139.03	175.49	117.93	70.33	79.75	62.59	68.99	73	67.78	46.66	46.12	109.17	129.17	157.99	216.7	112.87	98.67	261.28	268.06	234.79	164.04	177.16	295.97
CiPaw.08G039600.v1.1	42.17	33.94	26.06	157.13	141.41	136.93	281.44	303.78	371.07	267.55	283.5	338.63	90.68	67.56	71.35	107.19	106.09	98.71	59.64	73.89	83.4	116.43	128.31	128.63	174.46	210.84	248.34	201.31	203.99	162.97	78.4	56.44	90.84	135.51	70.36	105.12
CiPaw.01G189600.v1.1	0.17	1.55	0	564.12	261.56	588.15	492.53	562.13	270.43	561.43	300.54	278.24	164.01	45.09	95.59	73.48	80.85	168.08	0.83	0.33	0.66	101.82	75.7	70.85	42.83	15.69	22.54	26.2	24.51	111	28.28	52	61.73	21.61	69.46	35.72
CiPaw.12G113700.v1.1	0.31	0.42	0.37	226.84	140.12	229.33	132.27	199.9	149.72	164.03	136.72	114.06	64.13	37.07	59.79	13.71	24.72	21.73	0.42	0.71	1.73	96.56	122.44	104.56	128.25	53.67	145.7	99.74	31.46	88.43	23.65	45.41	14.64	12.92	25.72	20.1
CiPaw.03G181500.v1.1	119.7	110.07	126.72	118.67	101.87	110.05	325.48	169.35	260.56	93.58	103.56	83.76	60.05	26.08	30.88	69.54	39.17	57.93	265.53	294.58	260.79	109.67	121.16	126.11	98.76	135.34	107.5	34.14	39.91	36.39	20.93	23.69	26.2	13.27	14.95	14.45
CiPaw.13G065400.v1.1	140.51	175.94	156.98	50.02	44.22	64.52	39.27	56.3	36.32	94.98	66.8	64.58	407.25	287.07	430.86	335.74	392	323.47	111.8	114.68	136.25	89.22	96.37	80.38	92.51	80.94	85.09	111.33	99.23	94.57	309.9	355.1	368.61	344.54	279.09	395.48
CiPaw.15G084000.v1.1	107.89	113.52	107.63	362.46	266.36	383.34	304.12	242.27	239.32	198.85	242.5	243.06	311.39	180.69	277.93	218.39	198.39	149.75	91.49	85.68	85.11	256.96	211.53	152.33	197.2	219.22	247.33	160.44	139.43	155.59	264.88	378.28	239.2	215.57	207.56	269.79
CiPaw.05G061900.v1.1	46.23	47.18	44.19	241.2	196.27	213.01	97.97	222.18	131	332.9	289.63	211.04	328.23	108.17	257.08	275.23	327.9	381.96	1.51	0.68	2.44	53.76	54.22	114.36	43.62	23.89	18.66	104.61	32.76	61.8	30.13	90.06	40.29	74.94	62.27	43.16
CiPaw.07G177800.v1.1	180.6	205.76	179.53	457.58	455.4	408.71	364.5	364.85	353.18	352.34	413.63	363.88	279.28	228.63	256.81	208.36	235.23	213.14	185.5	188.38	172.51	366.37	400.16	344.69	294.57	268.25	256.18	223.33	242.39	237.85	193.53	204.77	194.37	206.37	246.92	203.02
CiPaw.05G186700.v1.1	158.86	158.03	141.16	290.09	316.86	270.41	123.66	131.12	122.92	123.58	85.84	81.02	88.77	186.63	145.66	113.72	179.57	144.22	148.59	143.59	169.84	536.08	525.33	530.2	232.51	177.34	202.51	188.21	189.89	224.74	231.11	299.48	205.22	307.37	372.27	237.98
CiPaw.06G171500.v1.1	83.23	32.29	33.03	30.32	30.31	41.75	43.7	24.89	29.14	50.26	23.6	27.06	68.43	113.06	118.73	201.43	262.14	235.94	80.71	67.63	97.47	181.66	148.47	222.71	68.58	38.6	44.77	88.65	74.6	107.34	356.52	1077.96	334.35	952.22	429.13	569.91
CiPaw.10G151300.v1.1	45.43	61.8	53.66	170.17	119.92	187.82	127.38	203.83	123.99	325.92	354.13	365.43	504.62	181.74	488.78	224.34	173.56	174.54	6.63	7.2	16.07	65.58	87.88	45.38	153.04	186.34	238.37	179.62	96.34	109.49	132.33	287.3	112.12	174.07	109.56	98.18
CiPaw.09G061000.v1.1	81.62	76.68	77.7	152.57	145.23	137.27	268.78	192.74	278.91	215.49	210.08	207.08	47.38	62.32	50.47	40.92	70.45	57.25	78.74	85.08	93.65	140.94	135.3	142.45	139.06	149.72	179.63	139.28	124.98	136.94	92.29	73.02	72.85	155.8	89.35	73.63
CiPaw.05G264400.v1.1	114.76	145.41	120.71	383.25	379.31	317.72	327.32	294.71	312.99	242.88	280.55	239.76	248.94	226.26	252.66	151.64	234.28	186.72	171.03	140.63	135.82	330.93	373.86	349.77	284.57	275.65	230.06	176.1	205.57	217.03	204.6	207.27	197.43	207.83	270.77	205.53
CiPaw.12G010500.v1.1	367.05	365.47	354.13	703.03	595.12	728	637.76	639.94	560.29	508.38	541.47	475.31	433.77	460.13	447.7	404.14	402.41	383.71	448.68	422.28	420.84	423.08	482.2	388.38	418.32	393.14	353.05	359.2	362.47	414.7	358.69	379.79	328.09	352.44	397.66	366.9
CiPaw.10G104400.v1.1	201.05	168.55	156.98	6.19	10.01	9.94	20.03	20.01	25.52	19.05	18.05	24.03	66.61	135.05	75.95	135.83	126.07	133.49	197.43	199.52	193.97	37.7	45.24	37.04	72.43	110.89	105.31	56.32	85.79	62.78	109.67	67.42	111.4	85.21	106.99	77.75
CiPaw.01G169800.v1.1	122.51	157.54	149.68	403.98	384.65	332.02	281.39	282.94	282.91	277.86	293.52	284.09	228.69	208.71	206.28	158.25	214.84	171.36	152.89	138.07	142.07	335.86	363.06	304.59	271.92	259.35	240.43	209.51	194.8	221.02	191.98	201.08	181.66	236.68	275.32	239.04
CiPaw.04G047800.v1.1	149.96	141.8	150.5	147.54	198.48	187.41	445.02	288.91	369.85	229.02	222.56	233.32	198.2	243.86	193.11	182.59	110.63	113.45	206.48	245.74	250.87	228.22	269.26	305.79	366.5	322.68	328.37	223.9	143.54	224.34	203.6	212.1	181.76	94.98	78.27	73.54
CiPaw.04G153400.v1.1	135.89	146.22	134.86	356.18	312.99	342.29	278.8	265.74	255.2	257.77	265.35	241.89	216.26	189.22	183.86	145.24	165.12	150.41	120.46	127.84	110.52	260.57	274.83	240.32	250.51	247.19	242.33	214.42	210.72	195.99	162.42	166.92	150.35	194.15	202.01	161.85
CiPaw.10G125900.v1.1	182.24	172.94	147.91	273.78	289.1	249.06	160.33	142.59	154.93	181.7	157.07	149.27	152.39	167.12	165	151.75	244.03	225.92	210.37	209.46	199.59	394.92	429.34	533.41	208.05	187.91	196.61	221.33	195.26	225.23	374.89	482.05	350.12	697.34	415.37	457.09
CiPaw.01G161000.v1.1	322.38	235.11	264.58	251.09	268.76	253.3	325.32	363.04	358.53	282.95	347.42	339.26	171.6	188.18	173.82	281.73	222.29	223.3	196.2	202.77	200.49	296.23	257.82	234.89	368.46	280.18	323.28	332.53	418.91	423.6	232.58	266.75	262.81	186.19	267.48	261.25
CiPaw.13G068900.v1.1	214.57	238.02	220.52	37.9	39.04	44.71	29.16	39.53	30.93	46.32	41.83	45.28	136.81	129.63	146.04	127.74	122	124.56	92.8	94.98	107.73	40.18	39.15	32.91	46.23	43.34	53.52	97.55	83.69	70.92	144.51	159.92	167.84	123.91	127.78	146.19
CiPaw.02G048100.v1.1	334.45	352.62	324.43	635.04	567.76	544.65	532.01	531	511.66	480.02	536.55	505.89	445.01	437.83	412.68	378.48	432.69	399.67	384.48	396.95	390.46	583.06	630.43	562.48	462.36	409.17	369.46	338.17	408.6	426.44	387.87	407.61	382.38	380.34	455.55	433.28
CiPaw.03G128700.v1.1	187.85	218.98	213.08	49.87	50.3	41.31	50.74	46.12	51.94	139.95	165.82	157.98	108.19	157.58	146.47	75.49	145.03	102.41	50.06	54.57	57.4	77.41	72.52	54.33	80.86	110.03	95.33	175.17	146.52	144.26	141.84	140.68	141.32	186.26	179.57	211.3
CiPaw.01G140700.v1.1	139.63	135.56	120.2	323.47	391.1	357.97	337.32	256.64	288.29	248.5	235.19	214.26	236.54	299.36	269.69	236.51	196.49	158.93	215.91	191.28	184.66	310.49	369	340.24	322	340.67	294.97	218.9	188.66	199.05	237.28	193.78	197.09	292.29	258.03	213.55
CiPaw.12G024200.v1.1	169.88	177.03	148.57	17.66	19.85	11.84	18.46	12.73	16.18	12.97	15.84	17.74	28.16	60.86	43.68	44.55	64.7	65.77	203.78	205.09	193.15	59.17	58.41	62.06	87.83	80.8	70.52	72.28	106.67	70.06	131.57	103.82	136.39	175.08	153.98	149.72
CiPaw.15G010200.v1.1	95.9	98.06	87.88	114.32	137.58	131.25	61.19	73.75	58.01	81.19	75.91	83.45	199.92	219.53	145.05	265.31	281.87	221.61	227.05	251.14	340.4	212.56	278.29	148.38	98.78	138.42	96.38	123.83	93.62	89.15	117.18	132.94	228.14	226.89	106.14	229.15
CiPaw.11G189900.v1.1	203.92	221.96	227.62	77.06	58.42	77	222.36	107.48	168.27	106.42	115.88	125.71	267.43	164.16	168.36	266.35	174.41	242.61	278.95	287.56	310.41	142.93	101.13	122.41	149.29	172.99	116.41	179.94	212.26	135.12	119.99	120.72	214.17	76.96	88.44	139.22
CiPaw.01G085200.v1.1	227.64	215.37	219.7	3.01	6.79	2.19	14.25	11.02	16.82	12.07	11.8	22.7	81.11	210.75	116.12	169.85	209.34	184.71	202.43	191.3	198.74	67.07	54.52	56.65	150.88	193.64	137.28	135.4	170.22	196.72	208.52	127.47	201.04	221.68	196.83	203.23
CiPaw.03G022400.v1.1	622.48	395.99	297.55	0	0	0	1.58	1.68	6.15	1.56	0.81	0.83	83.43	203.48	47.42	132.57	177.73	161.65	222	236.44	119.81	52.25	9.26	64.71	46.28	50.2	74.82	24.69	59.31	30.63	213.99	55.19	163.34	35.1	30.16	33.5
CiPaw.08G161800.v1.1	42.52	41.16	37.86	390.83	455.7	483.6	223.31	178.22	208.89	187.11	213.53	188.81	135.94	126.94	139.22	137.64	98.87	95.99	50.4	41.03	56.59	496.13	448.15	477.85	119.76	124.38	109.81	140.4	113.68	185.7	89.54	162.31	82.58	105.88	144.87	122.96
CiPaw.07G110700.v1.1	120.13	144.91	113.18	362.42	374.25	350.45	323.63	284.64	275.96	274.35	274.27	261.48	208.43	179.08	196.17	135.3	152.68	158.33	145.37	146.54	145.57	283.63	319.44	294.16	253.67	243.76	226.55	211.82	188.68	193.79	179.89	159.73	162.22	189.53	193.57	165.92
CiPaw.09G208700.v1.1	250.48	179.65	199.33	138.28	114.89	114.93	135.17	197.03	213.75	213.39	197.2	248.66	131.27	130.39	127.25	153.57	130.54	118.18	110.9	98.26	99.63	144.45	128.42	170.99	456.3	480.17	432.09	665.01	790.32	640.1	244.12	95.93	273.24	86.77	159.08	226.17
CiPaw.01G304000.v1.1	229.36	284.45	234.6	0.91	1.06	2.45	1.91	1.19	2.08	0.96	1.67	1.66	13.55	42.01	16.26	76.41	74.77	94.4	181.84	230.35	230.36	95.14	58.77	63.46	20.75	43.6	41.84	32.24	38.16	18.87	222.38	177.93	220.88	218.44	109.88	172.49
CiPaw.14G120300.v1.1	1.16	0.43	0.93	6.03	18.12	15.27	104.37	72.13	126.46	77.95	63.4	77.59	38.07	32.49	38.99	32.35	75.5	76.84	13.11	1.79	4.07	18.65	2.62	27.98	170.39	154.4	247.82	118.17	62.53	165.66	122.69	105.01	116.73	165.94	86.85	100.87
CiPaw.04G006300.v1.1	195.14	238.35	240.99	400.05	360.53	312.35	324.48	337.69	330.91	316.22	338.51	338.99	259.78	236.44	260.1	197.48	256.54	228.22	210.08	196.3	179.69	341.03	380.07	309.5	309.11	282.97	265.01	232.5	255.8	272.3	221.96	237.61	196.76	237.37	300.57	255.38
CiPaw.03G124400.v1.1	477.6	527.68	444.12	310.1	303.27	249.57	265.37	303.59	305.53	411.39	457.49	428.64	311.71	321.77	310.84	355.32	369.12	375.81	601.14	593.49	528.08	418.45	429.4	397.66	442.59	378.11	390.56	369.53	410.48	403.04	369.03	326.67	381.55	408.6	402.22	452.06
CiPaw.11G042400.v1.1	281.11	276.07	252.49	510.99	497.88	484.59	443.16	439.92	441.98	435.76	501.45	431.54	343.77	308.37	321.47	264.23	297.4	277.51	340.67	324.54	326.68	477.17	521.77	470.21	374.02	351.05	329.06	304.79	331.78	325.19	284.94	258.75	279.85	265.18	319.81	291.19
CiPaw.06G092200.v1.1	359.8	357.76	319.59	26.82	38.71	21.62	70.32	53.36	75.53	83.03	94.45	90.97	71.18	95.71	81.02	113.08	135.47	151.08	261.13	237.31	216.2	111.49	107.9	110.26	132.99	158.3	148.27	163.9	182.58	135.18	155.66	125.56	160.53	293.76	183.91	196.96
CiPaw.13G023300.v1.1	436	342.73	307.9	140.8	120.72	146.55	130.73	140.33	145.3	268.22	264.97	231.27	208.36	220.16	198.69	288.55	281.17	320.03	229.02	233.86	233.78	200.13	181.61	198.94	146.74	157.5	145.52	198.62	260.02	233.01	180.31	209.59	166.92	226.2	299.66	247.05
CiPaw.01G068700.v1.1	210.51	239.07	202.09	215.97	232.68	195.55	115.72	115.12	117.86	111.09	109.37	101.08	245.4	258.36	335.53	147.36	205.3	264.37	199.36	172.65	185.6	166.66	202.23	189.39	150.09	137.91	132.62	111.77	129.97	137.75	269.39	243.84	328.45	222.9	263.48	222.06
CiPaw.07G116600.v1.1	99.63	66.05	88.57	156.84	99.08	156.85	346.56	209.54	392.21	271.45	319.65	374.09	94.69	74.07	60.69	128.35	182.58	223.24	54.43	42.49	61.95	134.28	111.27	93.35	153.52	148.21	180.02	126.69	157.62	190.54	50.97	86.82	89.66	46.27	81.85	65.35
CiPaw.03G061300.v1.1	299.42	291.07	309.08	409.56	351.52	439.13	359.56	430.01	392.55	428.48	330.68	383.77	499.55	360.18	435.41	504.46	382.34	375.16	306.74	287.91	316.45	239.92	298.29	253	244.21	286.67	299.3	297.17	252.57	249.05	305.53	388.16	361.78	302.45	254.47	322.77
CiPaw.09G222600.v1.1	233.41	270.66	266.84	28.3	35.88	24.18	27.36	50.65	29.95	79.87	70.69	85.61	261.72	157.81	188.13	129.91	123.5	149.24	62.15	64.58	64.37	38.22	43.56	35.8	107.34	109.48	129.11	148.11	137.35	102.45	156.67	173.72	201.06	89.16	111.25	167.3
CiPaw.07G003500.v1.1	297.31	386.2	396.36	17.41	15.25	18.26	13.64	23.57	12.86	41.3	48.65	63.83	206.89	100.94	168.94	93.66	82.69	106.01	19.73	17.92	18.04	25.11	19.47	15.06	53.02	53.4	78.91	113.05	77.05	44.68	130.51	161.67	148.01	81.39	86.72	109.65
CiPaw.04G194100.v1.1	114.96	117.22	105.49	25.76	17.6	11.89	14.52	10.83	9.62	21.45	23.76	32.84	44.63	93.37	68.45	89.64	118.58	145.79	135.2	131.22	121.81	19.78	11.93	18.22	63.31	59.24	58.35	59.28	67.77	56.97	142.56	174.87	164.35	197.69	126.16	171.67
CiPaw.08G061900.v1.1	283.09	245.75	247.97	137.81	164.43	137.22	151.2	173.67	180.61	181.5	154.49	153.01	185.26	254.16	201.99	454.7	322.14	352.99	318.23	317.74	348.2	278.1	242.21	249.1	251.74	227.71	208.23	239.45	250.44	260.06	180.5	155.91	170.7	193.86	230.66	213.02
CiPaw.06G152200.v1.1	210.76	220.38	223.73	216.54	256.5	169.84	56.3	78.08	76.16	80	68.75	93.92	209.6	202.32	199.02	152.8	187.34	171.8	136.55	161.31	206.45	161.93	141.64	133.03	101.19	166.12	141.3	95.86	85.75	94.53	186.79	241.74	297.5	136.69	101.07	202.77
CiPaw.03G040000.v1.1	617.14	632.2	570.52	746.98	764.64	694.69	604.87	651.72	659.06	694.09	722.54	723.47	709.76	774.86	684.28	754.82	696.17	696.43	632.98	642.05	616.76	798.3	875.6	797.82	749.45	681.65	658.8	694.62	783.67	766.03	649.9	707.83	687.49	627.9	688	704.3
CiPaw.05G011700.v1.1	210.58	146.41	164.34	211.46	254.28	271.18	316.88	496.08	423.48	435.74	457.68	405.8	287.7	206.79	251.85	284.01	259.28	289.6	160.63	154.61	149.79	310.74	267.16	320.97	316.92	240.47	327.02	269.16	343.07	337.49	326.79	392.7	365.62	446.72	289.21	326.05
CiPaw.15G058100.v1.1	140.94	165.28	156.33	164.98	114.76	115.26	51.46	69.47	80.56	111.57	119.7	143.42	133.42	63.75	90.65	230.5	289.1	417.08	45.62	50.08	77.15	318.14	206.66	160.75	53.54	237.64	208.62	75.51	33.71	78.94	154.92	22.07	105.8	35.13	24.67	100.4
CiPaw.04G141200.v1.1	87.65	99.41	94.24	234.42	244.16	213.96	239.9	259.01	251.07	166.51	174.01	179.54	168.88	139.02	171.34	120.49	111.5	109.64	138.93	141.69	116.21	199.22	239.65	243.38	236.08	240.45	209.09	151.3	166.62	151.45	135.57	125.07	119.2	82.15	87.84	94.9
CiPaw.07G131800.v1.1	60.81	58.37	61.43	283.86	235.58	203.12	267.84	173.5	251.09	170.41	203.65	215.29	109.61	119.41	79.93	69.04	96.63	91.93	70.6	67.42	69.13	176.79	158.29	148.53	169.62	156.8	184.55	200.41	206.48	188.43	152.25	225	153.33	150.7	135.33	129.92
CiPaw.01G117100.v1.1	136.48	101.45	102.06	384.3	389.95	372.13	400.11	354.22	412.15	347.71	310.55	333.12	242.74	328.18	261.55	242.25	447.28	391.97	227.46	234.27	201.42	329.99	349.45	416.39	400.1	406.4	507.91	378.57	303.13	329.18	495.91	333.71	382.61	706.04	356.68	399.7
CiPaw.07G161100.v1.1	298.43	314.59	287.62	24.18	27.14	21.94	67.68	95.68	91.27	90.73	95.81	103.6	91.96	101.17	94.2	187.82	186.86	189.79	320	317.98	305.04	84.31	96.29	108.61	148.87	138.89	145.11	162.11	186.49	168.28	158.64	167.17	143.85	175.17	153.06	172.21
CiPaw.03G151700.v1.1	72.12	85.81	76.93	22.12	28.46	22.23	16.94	18.13	18.62	16.69	12.69	12.52	79.75	129.48	70.72	352.41	307.9	218.83	162.56	193.6	269.13	66.46	51.8	55.71	22.82	43.66	24.7	51.67	39.48	42.46	108.53	304.54	126.91	304.28	190.2	295.28
CiPaw.08G096700.v1.1	389.58	401.31	387.78	492.14	575.45	475.08	388.68	375.12	372.44	376.29	376.88	372.16	395.07	424.28	388.36	372.78	468.87	435.93	471.44	482.65	454.13	495.09	524.95	500.95	458.6	456.55	442.37	452.86	438.61	389.13	446.47	394.97	411.37	537.31	544.29	465.12
CiPaw.10G162500.v1.1	376.89	316.33	339.41	36.58	39.32	29.33	66.16	82.61	79.31	69.09	46.31	53.23	100.05	117.64	86.53	70.44	113.22	78.29	321.01	286.47	263.29	124.28	132.32	113.35	125.95	181.95	183.62	118.21	181.24	80.67	135.93	187.08	112.51	161.36	125.63	185.41
CiPaw.09G209800.v1.1	413.53	383.51	391.43	184.58	201.5	188.99	294.39	338.84	308.84	372.31	411.49	435.23	282.17	306.78	275.66	547.8	317.48	369.95	429.63	421.16	429.81	328.22	305	285.08	262.88	256.13	270.06	225.61	289.58	291.41	242.55	253.11	264.15	213.26	228.9	266.61
CiPaw.13G178400.v1.1	272.71	258.19	286.64	222.15	243.82	226.13	176.71	267.57	220.71	461.86	475.48	482.49	321.54	312.56	289.34	404.89	242.61	293.37	316.17	296.59	301.48	299.92	325.6	276.25	315.45	336.41	381.97	329.19	357.63	385.59	206.92	184.02	209.13	180.23	197.21	216.26
CiPaw.03G086700.v1.1	227.41	227.08	235.9	23.49	31.93	15.92	27.89	36.15	28.89	37.89	28.12	27.67	142.11	178.68	148.46	155.5	110.89	130.43	91.96	92.38	88.92	49.91	45.86	37.36	96.26	108.3	114.23	85.28	114.8	85.16	120.31	87.76	177.98	64.91	81.9	105.6
CiPaw.10G041500.v1.1	9.79	7.55	6.32	180.99	110.68	180.8	236.66	107.74	241.78	186.53	211.11	278.33	40.11	52.04	26.31	17.11	16.3	17.37	24.89	27.08	29.43	130.89	70.32	97.63	120.03	125.54	155.26	141.79	160.31	132.93	29.25	36.77	43.89	23.7	26.81	38.87
CiPaw.08G047900.v1.1	159.74	165.67	174.07	352.59	316.31	332.48	309.49	346.18	330.64	383.17	403.25	404.56	274.86	186.65	235	189.61	215.22	209.14	168.09	139.98	137.7	280.92	317.12	272.37	212.43	227.67	214.19	183	159.38	213.38	164.16	188.03	169.04	186.44	196.5	188.4
CiPaw.13G107900.v1.1	252.68	290.54	256.51	610.76	626.4	546.23	422.12	427.05	412.17	368.72	358.95	358.93	320.11	308.53	305.54	249.03	266.68	264.95	261.89	266.51	266.03	496.6	596.13	488.73	339.34	323.74	319.79	277.63	288.24	294.03	244.55	251.38	229.81	285.47	312.95	261.6
CiPaw.01G120800.v1.1	880.32	811.96	817.73	718.32	710.86	735.51	870.06	954.9	853.77	810.6	763.43	817.86	797.24	886.7	838.23	816.05	715.82	740.03	812.19	854.1	796.8	763.2	748.44	805.01	819.48	770.98	700.5	724.87	774.48	847.5	765.23	725.12	750.14	601.84	667.7	639.08
CiPaw.11G170900.v1.1	377.57	119.29	124.71	17.81	57.12	35.44	88.18	76.65	160.9	80.53	94.18	110.91	130.28	285.66	183.75	146.13	79.17	283.86	146.57	194.54	130.32	131.74	214.54	138.04	253.27	454.23	146.42	189.22	245.79	121.42	436.49	123.88	330.72	103.51	92.64	150.57
CiPaw.02G162100.v1.1	57.01	78.4	74.83	67.49	51.43	71.33	29.13	52.71	35.42	87.38	71.66	93.06	178.07	140.53	168.46	188.68	167.71	152.06	18.32	31.52	53.47	120.18	79.02	66.77	91.63	110.9	148.96	200.01	111.2	116.52	206.49	462.85	205.7	190.8	127.68	151.71
CiPaw.09G165700.v1.1	56.72	57.6	55.31	135.3	163.81	129.34	96.62	89.23	91.25	104.28	106.76	105.73	91.46	133.69	95.44	84.56	137.67	119.53	95.31	79.77	86.32	265.7	267.53	252.35	162.43	178.29	181.68	199.76	192.65	200.91	193.85	238.97	202.57	244.89	239.34	239.99
CiPaw.03G096000.v1.1	562.97	646.58	511.64	107.93	151.31	93.3	169.53	165.17	148.93	162.32	125.66	138.5	147.8	205.6	158.36	195.77	192.24	177.19	541.85	547.9	428.81	181.33	149.8	200.46	220.95	270.39	229.23	192.96	251.26	200.04	198.07	113.47	255.49	274.9	210.69	310.47
CiPaw.01G241000.v1.1	158.72	175.25	209.61	97.45	70.73	64.27	26.18	20.17	14.67	27.62	18.9	23.07	224.39	168.99	176.95	108	126.92	83.17	35.41	31.86	39.78	54.27	39.3	51.12	37.65	88.17	79.67	76.84	51.56	57.26	212.62	364.33	217.3	210.9	136.55	122.54
CiPaw.07G056500.v1.1	226.68	223.75	241.67	16.14	55.68	45.17	47.12	31.34	30.56	17.51	27.93	25.07	104.48	193.03	160.85	256.69	210.47	163.5	516.14	631.77	596.85	164.72	126.73	115.46	159.34	187.91	130.18	162.33	144.24	136.55	195.35	125.05	202.49	169.03	137.71	183.9
CiPaw.06G072400.v1.1	54.44	55.17	55.17	350.94	294.47	478.48	314.05	426.25	299.55	360.52	213.7	247.02	218.71	214.65	256.63	115.23	127.53	126.04	32.27	38.02	34.27	133.35	182.96	139.98	199.97	160.94	189.79	172.46	150.57	210.6	159.35	128.52	122.89	143.34	173	144.28
CiPaw.11G040200.v1.1	0	0	0	5.3	11.57	8.67	39.28	47.83	36.82	89.07	24.87	48.92	54.08	115.33	104.33	61.05	132.93	122.95	4.96	0.86	1.65	7.25	0	7.01	118.73	183.14	180.08	137.83	65.34	80.81	246.02	53.14	59.87	72.31	120.41	70.73
CiPaw.14G009500.v1.1	38.64	35.83	43.52	120.61	161.84	144.05	158.25	171.28	178.71	233.7	284.01	260.27	227.38	164.37	212.28	237.22	200.35	231.47	28.58	27.14	29.49	73.24	77.1	79.33	114.55	115.91	135.9	206.91	184.87	215.19	172.64	139.32	163.49	174.11	154.3	178.65
CiPaw.16G088700.v1.1	62.25	112.79	78.22	193.24	211.12	142.64	179.68	247.41	197.46	236.51	187.36	168.23	87.51	51.59	120.17	38.04	110.92	86.62	144.73	197.9	174.88	186.57	349.02	373	362.15	214.93	375.98	174.03	126.59	202.44	179.96	162.88	127.52	177.97	89.65	111.12
CiPaw.03G070000.v1.1	187.55	204.11	195.96	23.79	24.98	25.56	23.59	35.37	21.14	41.12	41.45	33.58	183.67	128.99	166.57	122.58	125.75	107.66	56.23	52.92	54.35	24.46	36.89	28.04	58.17	69.38	80.12	97.74	74.78	56.74	139.11	149.51	175.16	120.84	126.29	143.44
CiPaw.09G064300.v1.1	79.18	48.96	55.94	324.05	285.62	340.12	685.11	658.6	704.21	253.24	274.63	361.26	291.72	101.03	221.07	140.69	114.92	115.15	23.05	40.2	34.59	26.13	53.76	55.56	102.66	125.5	151.88	82.88	73.06	103.48	78.34	101.2	98.63	63.05	80.19	85.52
CiPaw.07G166300.v1.1	42.58	30.99	36.05	178.03	172.52	190.4	193.22	201.44	216.2	180.34	191.73	177.27	91.27	82.94	92.53	117.1	84.58	95.21	29.35	33.21	53.74	174.08	135.68	157.1	103.35	103.19	111.98	98.96	96.29	106.5	46.42	59.43	52.91	57.03	65.96	47.89
CiPaw.05G201900.v1.1	277.43	296.66	259.24	613.22	577.66	512.52	464.33	411.86	417.8	385.89	421.36	378.14	356.58	312.17	326.85	251.24	336.34	300.36	296.27	293.97	284.16	522.79	513.23	444.04	333.55	320.04	307.97	276.6	274.33	301	263.47	267.96	276.02	355.1	356.93	307.94
CiPaw.05G068000.v1.1	181.23	47.71	311.78	231.47	247.52	159.47	246.91	191.64	214.53	128.85	263.69	258.79	428.07	232.1	387.92	313.13	285.01	212.89	183.21	106.11	211.76	131.74	493.43	335.24	253.27	165.17	125.51	37.84	170.16	202.36	218.24	227.12	139.25	69.01	259.39	188.21
CiPaw.10G016400.v1.1	54.72	82.26	72.71	156.48	96.92	137.15	210.02	224.27	179.13	224.66	203.61	265.15	625.17	166.05	334.09	120.34	156.03	143.8	18.79	21.03	27.68	36.44	46.64	31.53	74.87	121.42	163.87	157.45	90.59	83.65	138.08	188.88	118.13	86.58	69.13	77.44
CiPaw.01G058400.v1.1	122.92	148.49	142.37	23.41	33.51	32.67	68.94	58.81	47.45	52.12	31.08	38.35	157.62	241.77	265.12	163.11	379.12	152.8	146.18	142.68	132.21	55.83	61.27	74.54	83.66	90.76	66.8	85.77	70.99	68.18	290.9	293.77	221.52	226.18	126.66	151.21
CiPaw.15G085500.v1.1	27.58	21.61	21.89	8.71	11.07	11.67	54.75	83.84	68.73	112.95	71.85	132.83	76.86	68.46	75.41	80.57	65.77	55.11	3.46	1.74	2.53	20.85	21.61	31.51	196.27	133.61	153.27	244.2	275	238.31	117.42	30.6	120.3	35.63	75.07	138.97
CiPaw.07G028800.v1.1	223.89	261.09	222.47	212.8	222.28	165.13	178.72	145.28	159.62	148.05	178.2	128.09	197.32	253.41	194.66	126.26	275.94	237.09	468.97	395.71	392.42	241.9	235.32	244.15	247.75	247.03	208.37	187.08	216.42	148.66	352.81	277.2	304.53	417.05	396.8	309.33
CiPaw.03G282100.v1.1	111.79	104.84	121.58	111.12	77.36	101.2	143.95	189.61	169.09	298.47	366.35	366.95	181.01	210.55	138.34	128.04	111.43	156.1	164.79	181.99	206	140.78	115.72	91.54	161.25	276.18	277.61	291.34	310.39	311.65	181.14	183.72	196.15	118.8	116.39	77.66
CiPaw.01G235900.v1.1	96.43	102.31	129.28	147.71	142.22	122.19	164.3	220.47	237.41	175.73	160.84	206.3	133.79	141.3	142.32	123.57	110.73	112.03	78.45	75.03	68.33	153.07	137.87	189.33	428.52	469.1	425.01	504.91	492.13	438.27	235.2	82.62	249.5	104.67	168.92	242.8
CiPaw.07G010500.v1.1	45.33	28.52	28.93	114.16	126.18	99.7	169.78	127.63	118.24	102.85	107.67	104.64	111.09	152.83	137.33	93.75	152.31	113.03	75.69	80.53	77.15	216.57	206.06	233.26	273.71	207.17	249.06	175.04	149.85	177.58	233.65	237.63	181.44	284.66	424.41	223.73
CiPaw.12G127000.v1.1	196.02	192.84	176.29	167.47	197.01	160.72	268.82	286.53	289.51	226.21	176.15	222.34	270.76	238.47	257.86	188.01	252.22	240.42	139.86	165.03	169.43	239.63	246.9	282.22	374.81	456.6	341.99	298.57	286.74	268.73	271.2	177.21	270.24	169.14	224.21	150.83
CiPaw.08G043500.v1.1	191.76	226.21	200	466.06	452.44	383.39	373.82	325.55	351.31	328.98	367.17	342.72	281.07	249.96	255.18	194.6	261.8	236	240.68	235.07	237.91	392.87	390.81	357.7	309.8	313.36	298.36	271.19	251.68	252.48	230.13	233.91	228.68	356.11	318.82	271.42
CiPaw.05G093800.v1.1	281.34	330.16	284.47	8.26	6.02	4.21	6.59	12.69	4.64	17.18	14.66	21.24	84.73	109.37	106.85	86.63	105.3	116.38	56.19	57.05	62.04	16.75	13.04	11.98	40.04	49.68	42.88	69.75	57.03	49.06	132.39	157.68	186.9	130.96	109.1	158.72
CiPaw.03G022700.v1.1	1.86	1.93	0.74	0.46	0	1.6	2.14	1.8	0.86	0.45	0.91	0.46	25.02	184.6	33.33	11.93	5.01	5.4	2306.76	3496.29	3752.2	50.67	51.84	129.24	120.79	314.63	247.02	43.44	108.99	208.16	518.95	79.27	356.02	356.54	378.5	294.47
CiPaw.05G093600.v1.1	141.85	153.4	148.82	66.4	67.34	71.06	46.38	49.21	45.45	73.97	57.45	74.47	167.26	185.43	147.6	172.84	186.3	192.91	132.46	120.41	162.01	76.78	75.3	63.98	69	73.81	75.09	120.55	113.28	101.56	147.34	235.01	217.3	143.52	163.66	251.52
CiPaw.01G190500.v1.1	170.83	184.19	167.56	332.47	321.22	306.74	284.74	305.91	294.01	327.39	343.31	311.06	266.18	255.64	259.73	223.62	236.88	246.01	165.24	161.01	176.74	328.56	359.55	287.86	220.79	195.65	225.33	232.01	207.69	214.76	194.88	225.44	186.47	245.77	245.25	205.39
CiPaw.14G059400.v1.1	355.59	388	336.06	495.49	555.87	453.18	373.6	363.61	375.87	340.97	341.06	331.94	356.87	407.5	380.8	301.6	434.69	394.9	525.9	489.48	448.21	512.22	583.31	597.31	467.02	444.46	407.76	366.91	426.51	414.37	442.16	399.68	409.12	431.39	538.32	471.27
CiPaw.08G037900.v1.1	91.67	90.04	99.65	371.78	261.69	471.15	303.61	478.54	329.29	405.41	358.23	311.15	215.99	131.73	218.93	109.55	111.42	138.19	71.49	65.63	67.08	152.19	149.72	151.1	156.27	124.67	136.45	166.44	123.86	211.59	96.79	89.46	92.89	78.16	94.14	132.05
CiPaw.05G099900.v1.1	168.36	184.03	153.27	339.55	297.15	291.38	340.82	344.72	335.89	248.23	276.12	283.08	307.2	228.03	262.52	195.5	229.57	188.69	179.72	170.46	174.52	309.54	366.7	333.39	239.46	200.67	171.41	169.89	216.81	197.09	191.48	221.99	202.74	142.22	204.28	184.92
CiPaw.09G213800.v1.1	61.56	63.22	190.95	107.64	103.99	110.96	57.05	63.1	54.52	121.68	155.87	142.84	441.95	141.18	461.22	142.96	149.64	166.49	7.31	8.11	7.36	124.02	178.43	73.34	85	51.06	100.05	83.7	29.58	113.89	121.38	252.34	119.53	15.49	206.93	17.82
CiPaw.05G156200.v1.1	176.92	178.98	179.61	546.97	412.26	539.33	352.52	327.72	300.49	299.46	265.08	311.99	191.66	185.78	187.78	185.79	166.31	165.43	239.12	194.33	217.63	233.71	215.31	258.7	260.75	285.04	233.56	226.66	171.67	230.44	237.6	228.8	285.02	217.89	196.5	318.15
CiPaw.01G305700.v1.1	37.61	48.86	63.67	19.63	13.65	18.37	34.9	50.11	23.7	76.01	63.77	83.32	253.94	155.52	255.76	116.11	115.45	96.88	0.29	0.29	1.53	14.86	18.03	10.79	70.91	72.98	102.74	136.64	70.8	79.58	179.24	243.06	141.37	133.37	103.41	105
CiPaw.09G215900.v1.1	157.58	225.39	208.01	66.87	58.19	61.62	38.01	97.29	48.71	122.87	122.98	151.29	376.23	160.15	277.4	134.02	164.41	136.41	32.1	35.54	39.51	72	65.6	50.4	122.54	134.8	155.13	159.72	135.05	106.56	149.9	199.17	204.46	101.58	103.52	187.05
CiPaw.10G044100.v1.1	227.96	230.42	237.59	126.64	127.94	130.91	153.34	207.64	173.69	251.97	239.43	258.8	291.68	194.79	303.4	179.57	152.84	139.11	57.81	74.7	79.91	142.89	106.28	103.88	197.45	259.65	325.84	227.69	161.99	176.09	209.13	247.88	224.57	228.82	146.79	158.53
CiPaw.07G080000.v1.1	976.34	887.35	807.3	887.53	894.51	909.39	907.42	1019.47	876.45	872.52	855.59	832.88	826.48	979.7	847.35	877.7	871.07	907.99	1016.36	1096.98	1127.22	1006.69	980.04	978.79	946.72	898.67	920.52	847.91	822.59	840.52	762.65	712.17	840.73	839.87	784.82	712.91
CiPaw.01G063300.v1.1	22.42	19.77	20.69	193.42	205.01	154.98	166.14	125.79	157.77	182.31	178.76	164.09	84.46	93.68	85.13	66.01	78.82	81.41	33.5	34.14	35.33	190.28	181.52	186.66	132.85	129.49	134.24	149.51	119.87	183.28	97.82	114.17	96.04	65.81	118.18	64.07
CiPaw.04G031000.v1.1	168.05	197.24	174.45	27.5	32.13	24.4	58.89	44.98	53.35	33.8	23.16	29.81	146.86	189.48	132.96	201.19	138.87	184.37	150.4	162.58	135.36	114.33	90.75	79.47	33.18	60.03	40.6	77.98	111.48	70.38	74.79	38.01	102.06	47.31	29.67	95.93
CiPaw.15G052400.v1.1	380.57	328.51	322.08	352.25	372.89	397.87	248.91	248.01	240.16	232.46	192.69	198.82	222.77	240.62	254.41	346.07	318.05	327.51	312.89	294.73	294.33	333.68	318.74	391.09	315.04	239.77	241.01	266.28	278.53	294.73	279.42	232.07	249.26	380.66	344.91	276.34
CiPaw.13G123000.v1.1	11.92	14.83	13.43	275.16	215.24	270.13	295.64	336.9	355.25	220.54	233.18	283.63	109.17	55.33	86.41	68.38	87.8	68.54	17.3	18.53	27.29	91.14	85.48	84.62	106.92	92.83	105.5	146.11	156.67	129	44.66	112.29	66.93	53.44	42.28	74.62
CiPaw.04G138500.v1.1	85.4	90.22	81.38	20.63	30.33	10.83	24.29	20.35	26.03	14.86	21.6	21.75	39.13	117.57	68.15	73.53	135.2	106.37	72.52	78.54	90.93	191.85	167.1	189.26	135.43	110.88	98.78	105.76	138.62	121.6	143.05	180.15	131.26	163.01	181.56	185.21
CiPaw.11G130100.v1.1	89.46	96.38	107.88	7	4.13	9.2	6.37	21.15	5.99	66.45	45.83	66.82	176.13	129.89	231.24	90.87	91.82	63.44	1.45	1	1.89	12.91	21.94	13.87	66.15	67.82	78.69	112.85	71.05	65.66	145.55	251.14	168.14	86.06	90.76	132.26
CiPaw.05G120900.v1.1	146.32	135.04	154.23	137.43	146.48	123.08	150.13	196.4	183.41	217.35	210.31	216.04	102.64	100.6	96.7	135.43	79.85	102.34	195.4	185.8	172.61	159.63	165.93	155.99	199.6	194.48	228.12	145.32	168.79	157.72	80.78	57.93	89.72	58.48	65.7	74.89
CiPaw.03G248400.v1.1	238.93	260.46	257.67	340.97	220.23	402.58	743.96	603.45	483.51	594.28	576.68	407.39	454.47	125.56	323.34	79.78	119.91	99.18	90.31	74.55	79.95	41.08	28.22	50.75	101.94	74.77	106.62	80.5	75.6	55.61	85.43	85.05	104.3	102.34	115.13	140.66
CiPaw.15G129600.v1.1	44.69	42.95	41.32	409.25	307.92	413.66	442.08	389.41	410.98	195.72	180.07	177.54	125.5	122.45	167.11	94.31	73.14	90.3	39.8	38.15	37.65	118.6	130.85	111.92	90.15	77.86	100.29	51.9	49.43	66.5	69.76	56.11	63.27	42.67	39.25	44.21
CiPaw.16G074700.v1.1	152.36	168.68	180.43	44.45	48.34	52.72	38.47	46.74	34.25	60.65	62.81	64.32	212.75	213.39	231.17	197.58	176.33	191.33	44.8	48.17	72.75	64	71.41	51.08	77.47	69.08	82.47	135.95	103.54	96.64	208.62	306.04	234.51	165.09	198.61	201.15
CiPaw.11G199500.v1.1	121.87	129.75	113.47	234.99	218.86	227.61	253	290.71	262.77	287.79	271.59	254.14	215.35	177.72	216.04	149.43	153.15	163.46	157.15	137.28	156.3	219.44	253.95	211.2	248.82	243.26	239.66	209.94	175.54	203.89	150.68	146.66	148.38	205.58	162.47	159.03
CiPaw.02G125900.v1.1	123.02	115.3	123.15	62.5	77.57	59.95	45.08	58.45	47.02	74.52	69.16	70.26	215.6	275.33	212.74	186.81	243.28	186.47	124.33	148.68	170.5	133.79	140.24	115.77	73.09	102.1	85.03	92.52	103.81	102.27	205.5	183.77	186.32	114.55	137.13	154.86
CiPaw.03G018200.v1.1	116.49	100.56	97.99	140.47	168.71	152.97	112.51	126.25	137.67	113.03	127.91	125.71	122.8	153.6	157.39	145.7	160.58	170.86	263.98	264.01	251.14	255.79	315.39	302.28	277.57	197.78	222.15	222.18	201.26	219.06	223.14	158.02	186.3	219.09	241.42	161.72
CiPaw.07G199600.v1.1	206.08	243.51	218.07	39.15	38.66	37.59	43.24	39.34	37.18	77.28	51.45	70.73	137.29	111.77	134.36	107.96	108.36	95.28	29.24	33.39	42.62	39.95	32.49	34.74	71.79	77.59	101.63	184.87	126.36	100.97	122.51	174.08	130.99	113.84	82.89	110.67
CiPaw.03G275200.v1.1	0.68	0.44	0	373.09	216.26	298.29	439.58	256.46	407.98	165.48	197.78	220.82	75.58	30.09	22.91	4.3	27.95	20.71	0	0	2.08	49.53	56.69	63.6	66.85	60.79	104.88	57.4	57.67	85.74	28.55	33.1	28.15	10.68	6.69	8.45
CiPaw.05G232300.v1.1	174.42	198.14	160.39	298.14	295.54	258.69	342.81	311.56	303.21	381.26	421.36	386.78	263.45	290.55	265.49	238.54	254.51	250.06	202.18	176.25	191.15	324.35	326.67	306.19	249.6	256.19	207.07	239.35	211.54	216.31	205.44	215.63	197.81	246.59	259.22	224.55
CiPaw.11G011100.v1.1	83.2	74.55	81.42	415.03	268.19	346.59	186.43	263.84	220.6	275.86	197.72	225.53	134.91	107.47	153.73	66.57	57.53	69.56	65.42	74.76	77.44	155.61	247.01	154.43	109.74	91.51	120.03	125.73	85.89	167.8	54.92	69.95	75.42	26.77	59.27	42.1
CiPaw.15G122300.v1.1	186.81	174.69	186.03	151.84	173.03	169.76	232.59	306.77	296.79	307.13	299.9	324.17	222.94	193.59	205.92	223.02	166.05	176.33	226.98	208.8	213.99	285.1	300.11	260.13	294.17	250.78	275.41	252.17	256.86	284.79	157.02	166.32	172.95	136.09	155.69	184.15
CiPaw.15G047000.v1.1	0.35	0.21	0.2	209.72	95.75	179.07	279.07	200.77	199.9	201.39	139.82	133.61	133.2	26.96	73.54	41.01	31.75	27.91	1.85	0.63	0.75	50.31	38.68	67.53	97.43	85.22	137.69	75.48	51.98	117.47	30.03	45.97	47.37	14.08	43.83	21.35
CiPaw.10G145500.v1.1	28.39	25.75	25.84	17.16	36.12	42.18	81.13	79.39	80.43	92.08	86.53	88.76	137.39	120.5	167.48	104.69	83.59	102.87	46.52	50.06	53.57	143.84	152.88	243.44	265.29	111.61	160.35	241.02	192.86	280.51	241.06	97.08	190.43	69.08	91.8	91.49
CiPaw.12G080400.v1.1	50.8	78.82	63.25	134.14	171.95	142.5	260.38	414.68	359.99	327.36	406.75	429.89	172.34	181.53	160.07	166.32	113.53	125.25	57.81	58.33	34.17	192.38	137.63	187.14	210.57	115.75	160.74	182.83	199.8	239.27	159.93	158.84	122.34	90.48	69.4	88.68
CiPaw.09G043500.v1.1	11.9	11.84	16.2	150.2	179.99	152.98	16.16	15.91	18.39	41.35	22.23	17.36	52.37	115.79	68.88	235.37	175.82	112.15	29.72	37.94	84.72	282.16	258.87	216.97	16.48	17.79	15.14	23.61	15.43	25	69.48	288.06	107.33	163.08	136.04	153.68
CiPaw.13G082900.v1.1	110.24	103.43	114.62	273.56	272.5	362.39	202.36	265.57	208.11	168.11	174.71	148.26	129.39	102.28	144.08	141.38	127.31	125.09	84.05	73.9	75.44	298.78	207.26	196.8	150.52	118.23	147.37	91.72	87.17	108.52	68.43	44.71	63.52	39.68	45.56	49.08
CiPaw.11G202800.v1.1	119.5	154.21	133.04	5.08	16.19	9.04	33.77	32.56	24.88	3.1	3.84	23.02	53.42	125.25	85.9	49.56	92.16	36.87	235.08	243.19	234.26	40.02	28.28	24.65	144.46	164.78	74.87	95.23	28.88	54.81	106.84	74.31	99.23	75.71	91.7	79.08
CiPaw.05G109700.v1.1	279.58	229.67	263.94	214.96	224.3	191.01	205.3	253.15	273.94	258.34	249.58	272.69	194.51	188.14	189.15	220.89	170.67	152.58	199.64	171.27	163.38	252.96	230.13	259.11	512.45	510.25	518.61	713.68	774.28	653.73	285.37	103	311.54	117.62	208.6	285.05
CiPaw.04G046800.v1.1	34.69	50.37	46.39	9.9	9.65	8.11	8.6	26.3	12.57	48.66	53.76	71.75	200.5	122.45	218.94	86.62	80.45	78.57	2.54	2.2	2.5	17.54	22.92	13.93	78.77	62.67	92.71	113.46	85.41	68.41	153.76	168.8	164.29	86.06	93.7	119.27
CiPaw.08G051100.v1.1	1.56	2.41	1.33	301.65	228.77	339.74	645.48	536.91	627.46	294.47	336.2	358.14	64.78	18.51	33.16	34.76	47.65	33.57	1.64	1.34	4.15	109.13	125.6	105.52	72.22	78.33	94.39	67.2	47	75.28	15	38.19	15.37	16.34	19.2	16.42
CiPaw.09G162900.v1.1	149.79	166.25	145.58	386.98	350.88	347.36	272.17	276.59	261.6	308.75	319.74	300.4	241.71	194.86	208.41	203.33	211.64	204.75	167.77	158.34	174.34	296.63	322.12	275.9	217.62	214.89	219.64	208.89	196.15	212.79	172.98	179	171.19	263.17	233.57	223.25
CiPaw.08G002700.v1.1	38.84	35.96	34.29	266.13	249.66	251.44	378.05	385.95	382.8	300.92	326.83	340.39	220.07	111.13	140.28	180.44	139.02	183.09	41.72	40	46.79	90.09	90.5	90.77	139.81	119.55	153.09	124.94	108.43	148.1	93.33	115.25	112.97	95.16	107.8	113.73
CiPaw.09G187000.v1.1	142	155.38	139.96	338.43	317.19	318.15	249.72	251.65	249.82	242.59	244.48	244.45	253.59	208.01	226.31	169.36	199.84	187.33	145.85	139.31	145.52	254.74	290.29	279.74	216.21	201.34	216.07	162.06	190.49	130.95	173.05	162.77	158.98	219.97	194.25	143.53
CiPaw.03G169200.v1.1	31.31	25.74	24.81	127.82	151.2	116.17	547.54	373.65	606	151.57	245.68	236.85	9.62	8	4.74	76.22	81.52	76.94	42	52.77	65.3	87.75	84.12	85.48	72.01	74.88	68.41	41.77	75.86	52.67	7.24	11.5	10.46	18.33	19.55	34.1
CiPaw.06G170800.v1.1	167.93	173.7	164.8	45.14	75.14	59.95	55.79	61.75	59.6	66.73	73.91	73.11	107.06	212.9	127.42	153.83	196.93	184.57	219.59	222.14	220.99	96.53	91.74	99.59	126.13	165.48	143.03	152.12	169.16	161.63	180.96	129.98	188.32	172.07	169.43	251.06
CiPaw.01G212500.v1.1	211.82	212.18	205.21	114.09	111.52	109.58	109.08	113	126.15	119.75	122.57	120.14	120.32	191.89	143.81	213.55	228.27	250.29	301	268.5	267.73	170.68	168.76	166.1	202.14	201.56	201.78	212.29	217.2	245.89	232.48	246.82	226.25	342.88	325.61	326.85
CiPaw.05G202200.v1.1	18.1	12.4	15.01	113	147.51	124.8	43.96	95.76	79.41	99.5	109.96	95.7	153.91	124.98	152.77	212.34	134.04	187.73	7.64	6.01	7.29	151.85	135.46	136.36	41.37	49.18	49.37	30.24	42.86	41.2	68.16	33.13	65.1	29.15	36.98	31.83
CiPaw.03G144100.v1.1	102.49	108.71	96.3	16.55	22.26	11.94	14.17	10.07	12.69	9.2	12.53	9.34	16	48.65	23.66	44.58	70.58	45.91	110.5	110.78	122.29	174.85	134.46	122.12	66.48	54.65	47.33	65.01	64.58	46.79	76.77	92.26	79.49	121.66	137.79	123.04
CiPaw.03G165900.v1.1	189.43	206.57	204.12	6.04	8.68	4.4	18.61	25.02	18.96	41.02	35.44	38.31	126.97	114.72	164.06	144.82	86.04	121.17	7.48	5.73	7.67	42.41	31.7	24.82	80.01	82.04	94.45	117.32	93.01	76.71	100.1	119.81	126.97	41.3	59.41	104.38
CiPaw.08G111600.v1.1	163.62	171.42	172.09	12.06	14.6	8.65	14.45	15.6	17.89	14.02	15.02	19.57	32.22	100.98	49.51	83.75	126.93	106.07	156.36	150.49	148.79	28.46	22.76	23.05	52.82	56.21	42.96	50.3	70.58	75.14	103.99	81.64	103.78	128.68	157.66	123.54
CiPaw.10G152200.v1.1	3.32	1.64	0.86	206.06	153.78	238.15	173.61	233.72	171.45	243.78	170.15	157.25	123.61	64.09	120.34	49.27	59.07	48.18	0.6	1.51	1.33	102.51	88.73	69.21	15	11.35	9.9	10.3	11.74	8.34	16.66	26.86	57.71	10.47	10.73	4.89
CiPaw.15G047200.v1.1	0.35	0.54	0.24	146.3	73.7	119.87	282	170.92	227.09	149.1	96.7	102.74	131.57	39.73	87.48	42.59	30.8	34.19	0.96	0.17	0.14	68.45	42.84	67.73	153.97	117.08	170.23	117.58	72.05	174.88	44.05	39.97	81.35	24.75	77.17	34.3
CiPaw.05G050500.v1.1	0.44	1	0.28	117.8	49.13	121.13	514.78	732.29	462.03	836.35	374.94	463.63	134.36	37.78	114.91	11.42	36.84	80.27	0.09	0.44	2.63	10.01	22.21	13.97	61.76	51.41	89.81	150.22	39.22	145.19	16.42	89.82	41.65	34.03	35.8	19.51
CiPaw.16G026000.v1.1	1.34	1	1.13	364.39	281.37	348.81	143.34	92.93	153.35	127.27	151.31	142.23	58.42	32.49	45.75	113.42	74.22	65.93	2.98	4.51	13.59	341.18	264.77	267.43	62.19	86.49	82.1	47.63	26.41	71.97	24.7	75.74	43.99	55.89	36.85	31.57
CiPaw.09G140300.v1.1	182.24	194.72	177.56	461.26	445.61	377.44	361.6	351.57	344.15	312.46	351.37	317.89	286.82	271.2	263.12	238.91	266.61	254.15	229.47	225.58	218.68	384.63	410.09	353.14	332.01	304.82	276.23	259.83	258.83	259.12	229.34	241.55	242.27	289.2	319.41	242.5
CiPaw.05G080700.v1.1	211.9	300.17	269.28	67.4	68.34	85.32	40.5	72.37	29.76	67.3	55.15	77.13	427.49	357.99	461.47	306.93	473.7	243.64	62.53	79.67	81.85	83.74	78.71	67.51	81.78	79.03	128.99	149.43	90.23	75.7	315.73	331.78	345.54	253.85	159.25	318.61
CiPaw.10G158200.v1.1	8.29	7.98	5.19	227.15	179.75	154.87	487	249.55	369.88	167.81	171.83	263.26	144.09	67.98	50.22	24.08	49.11	44.83	9.3	11.4	13.63	52.42	55.81	64.06	65.67	88.59	129.51	104.36	94.76	78.81	39.74	87.13	66.18	21.83	21.67	25.25
CiPaw.01G259800.v1.1	88.56	75.16	84.81	7.8	11.27	4.47	17.38	20.7	24.18	35.99	39.2	55	121.44	261.66	175.88	160.63	154.32	239.05	47.93	41.34	40.48	47.72	30.83	33.15	67.18	107.11	104.55	82.04	93.13	63.08	148.88	86.93	162.5	139.7	140.84	221.32
CiPaw.02G118400.v1.1	184.78	133.82	160.3	17	18.18	13.77	56.2	39.54	57.15	55.35	61.22	84.27	90.95	141.54	77.08	122.19	87.76	92.58	202.92	173.54	173.43	65.73	70	74.39	193.24	216.09	175.38	136.54	231.69	157.39	91.21	30.23	81.62	44.22	48.93	78.3
CiPaw.08G094400.v1.1	16.03	34.36	24.34	536.92	381.14	519.92	339.06	240.06	237.66	190.21	246.3	310.73	369.3	122.62	218.41	51.25	95.8	69.09	1.1	2.98	5.48	77.73	101.39	63.64	58.57	66.93	61.31	56.41	38.98	66.32	61.3	117.13	80.93	28.91	57.47	72.24
CiPaw.01G143200.v1.1	1.14	0	0	121.08	77.34	107.99	88.44	134.4	102.07	79.14	58.14	54.21	20.19	18.68	34.69	12.08	20.06	23.36	0.92	1.6	3.63	69.29	64.8	57.75	202.28	169.66	292.46	202.88	127.47	231.7	94.71	63.23	93.84	66.8	88.78	53.62
CiPaw.01G165100.v1.1	84.28	81.01	86.96	114.03	134.82	102.84	385.94	169.87	283.09	167.24	171.53	201.94	186.34	162.18	148.4	142.66	106.38	150.55	259.24	216.55	194.65	187.63	210.47	267.34	226.18	215.95	230.71	266.5	222.85	246.63	200	168.61	191.95	92.42	109.55	121.08
CiPaw.13G149400.v1.1	42.28	23.56	28	9.03	16.5	2.61	21.68	19.59	26.94	20.29	64.84	34.43	21.25	105.34	89.38	27.97	88.59	60.1	18.44	17.68	16.52	63.68	65.8	68.01	292.31	121.54	152.77	144.58	131.74	108.28	159.69	93.71	123.59	261.33	320.67	189.83
CiPaw.08G127900.v1.1	454.98	457.93	441.74	429.25	429.87	442.41	358.99	345.17	358.68	352.41	323.75	309.96	341.95	368.13	347.15	388.89	435.99	422.85	433.14	443.78	459.79	435	425.82	435.88	379.26	365.77	356.07	282.1	309.57	317.29	381.53	406.35	354.94	445.47	459.07	382.62
CiPaw.05G154100.v1.1	378.05	302.6	249.26	687.73	496.2	600.8	398.83	462.94	366.02	498.08	380.62	452.84	313.69	439.8	409.22	452.64	414.68	309.25	432.44	372.4	384.65	431.12	435.15	505.33	455.12	410.29	380.57	406.88	442.09	517.37	452.59	466.7	472.45	367.8	438.79	526.06
CiPaw.13G035000.v1.1	57.93	75.97	73.17	116.01	49.5	113.96	76.06	81.52	59.1	120.88	158.68	114.83	120.77	71.74	125.21	127.73	86.19	98.04	3.34	8.66	11.67	19.25	13.49	13.29	10.22	17.31	22.59	21.24	29.04	23.22	79.4	150.94	116.83	41.9	95.51	107.29
CiPaw.05G152100.v1.1	259.45	285.29	285.11	171.54	177.19	183.71	196.49	228.65	213.36	221.68	215.49	219.33	232.69	226.99	209.34	199.91	170.07	183.87	282.39	341.64	321.89	105.94	104.97	108.02	150.55	176.26	169.49	119.6	144.68	130.41	158.62	126.85	146.55	94.74	116.95	94.16
CiPaw.11G180200.v1.1	182.2	197.89	197.43	59.57	78.15	49.01	163.81	146.53	167.51	123.07	131.3	144.5	67.87	84.74	82.22	54.69	90.34	81.42	247.29	212.44	185.99	148.22	173.73	164.21	229.82	196.93	191.9	155.86	186.42	167.73	124.27	62.22	104.26	85.87	108.43	124.86
CiPaw.11G110200.v1.1	126.74	118.43	114.78	1.79	3.5	1.11	8.21	7.05	11.83	20.07	29.06	27.15	36.04	71.3	45.1	79	66.68	79.49	125.9	127.03	133.31	28.24	28.73	21.76	78.59	93.09	61.75	69.2	100.34	66.25	126.77	105.15	121.26	126.04	107.26	116.99
CiPaw.07G087000.v1.1	48.2	38.95	39.73	99.14	87.49	77.6	180.3	144.03	161.46	74.79	114.61	76.88	29.03	17.93	23.74	51.53	17.4	29.45	147.79	161.59	125.8	79.79	106.84	112.28	99.35	128.89	107.03	30.26	29.49	27.29	12.19	12.74	13.16	6.28	6.76	5.19
CiPaw.13G052900.v1.1	127.38	160.94	142.93	361.43	352	297.27	281.73	248.19	281.43	218.57	268.82	247.78	227.78	216.36	227.92	162.38	223.52	191.31	147.04	139.23	154.24	369.13	370.96	322.08	262.96	219.09	215.03	178.93	185.7	194.76	182.98	175.41	174.2	231.18	242.54	199.62
CiPaw.10G144400.v1.1	157.12	127.29	113.92	61.54	233.76	122.95	244.77	99.77	218.67	83.21	232.2	128.21	101.16	127.83	37.05	115.32	81.02	30.9	132.05	92.43	85.06	235.58	191.47	69.62	158.63	110.68	74.88	66.99	168.43	109.14	278.43	150.93	184.54	0	299.16	193.85
CiPaw.08G148800.v1.1	150.77	147.29	159.85	0.19	0.76	0.28	2.4	2.81	2.83	3.83	5.06	5.59	99.68	196.76	132.37	414.93	189.23	327.44	284.27	325.83	403.83	54.1	34.1	26.66	22.19	34.28	34.8	45.83	66.99	53.59	46.61	14.26	76.04	47.45	42.63	74.77
CiPaw.01G115800.v1.1	86.47	66.08	69.58	265.61	283.75	226.34	355.06	280.25	250.22	211.92	171.39	218.22	470.92	367.94	443.43	253.45	528.8	294.21	113.11	139.85	150.78	299.26	232.71	260.64	229.71	231.51	255.57	247.75	269.51	241.64	418.05	375.95	422.4	309.11	400.34	273.03
CiPaw.06G086800.v1.1	131.93	122.97	82.62	533.02	491.67	386.81	267.51	365.42	270.66	97.43	94.25	89.5	73.42	77.22	105.04	11.04	25.87	13.98	131.93	89.72	85.52	27.32	54.46	69.21	84.5	85.38	55.11	23.35	35.62	22.47	35.64	16.61	41.48	51.99	59.03	31.27
CiPaw.03G106100.v1.1	201.96	173.48	185.17	105.94	105.32	103.12	95.43	113.35	123.35	94.61	112.42	116.96	148.17	238.02	200.5	207.83	250.88	205.83	212.65	201.39	190.45	195.85	158.68	186.87	240.43	181.67	180.58	170.68	244.69	223.49	238.23	164.7	243.13	136.76	258.38	263.31
CiPaw.03G060300.v1.1	421.59	447.7	424.91	477.43	495.47	419.4	356.86	329.99	346.78	358.16	345.25	347.65	341.5	434.41	362.62	390.37	426.93	404.71	538.57	518.15	493.14	510.2	548.85	505.97	458.56	464.92	412.75	383.63	416.53	432.24	459.1	465.59	438.84	472.88	493.33	438.62
CiPaw.11G184600.v1.1	925.63	1029.92	1144.67	166.87	179.96	172.39	409.9	249.4	332.3	268.73	316.29	302.83	252.99	296.58	307.8	395.48	323.2	353.55	655.36	785.46	790.68	274.02	238.83	272.02	280.18	330.59	356.56	256.49	288.37	227.29	324.62	343.51	276.72	297.78	275.09	283.18
CiPaw.06G127900.v1.1	255.12	331.74	277.98	16.75	14.53	12.27	23.67	42.69	24.72	75.38	81.71	88.85	128.62	129.68	168.15	52.36	82.02	72.19	69.35	66.79	65.43	61.9	71.45	65.21	85.96	129.69	119.11	145.3	137.4	89.87	169.23	197.63	197.89	154.68	138.83	215.38
CiPaw.15G060300.v1.1	177.46	141.44	168.42	74.12	135.85	93.24	22.61	26.19	36.63	27.8	27.82	34.22	72.15	87.68	69.36	142.8	105.59	137.49	136.19	139.55	132.23	129.51	86.66	81.79	8.06	11.25	15.05	31.46	38.36	21.47	56.12	42.92	79.02	45.2	40.95	81.87
CiPaw.08G004200.v1.1	128.13	102.98	104.77	94.66	101.26	83.61	192.72	239.24	256.35	268.36	292.01	309.83	121.86	160.37	134.95	201.14	162.11	183.11	126.59	129.04	127.86	159.03	139.37	146.07	262.67	252.71	294.66	313.35	338.68	253.77	138.68	93.5	136.45	157.95	135.63	149.05
CiPaw.07G157200.v1.1	162.82	140.38	168.17	127.94	230.36	129.77	32.44	45.8	52.28	43.97	50.71	36.17	107.86	98.02	100.96	166.57	136.42	116.81	184.1	139.88	155.88	199.47	182.76	140.19	57.18	76.03	106.43	60.42	64.71	61.94	50.95	32.45	60.15	107.93	74.57	86.99
CiPaw.05G210500.v1.1	148.24	132.43	133.82	1.44	3.01	1.61	4.24	3.26	4.31	2.93	2.01	2	18.39	65	20.78	99.73	98.46	58.03	350	375.43	429.97	71.77	20.31	30.1	16.7	49.64	20.96	86.11	65.5	91.87	62.6	59.6	64.08	105.15	83.51	130.11
CiPaw.09G167200.v1.1	123.42	109.79	114.23	174.39	193.33	231.44	213.71	278.97	224.02	230.76	195.01	203.4	117.59	116.9	116.87	119.62	109.91	121.63	197.54	190.15	198.35	227.54	231.87	240.3	297.83	223.17	282.43	204.46	203.7	239.37	152.47	161.53	145.78	124.72	149.24	143.54
CiPaw.06G061500.v1.1	127.11	152	119.99	325.65	320.89	302.03	322.27	283.02	279.66	190.68	205.85	204.59	231.35	240.18	228.48	176.47	228.33	208.53	172.56	170.35	160.9	311.83	384.74	314.95	277.01	264.04	250.54	194.91	193.82	211.55	229.53	229.59	192.33	258.24	285.37	212.46
CiPaw.09G059000.v1.1	56.57	64.18	57.18	201.44	173.44	199.58	156.91	210.12	187.99	169.81	176.59	172.11	99.11	75.81	118.73	24.94	45.07	39.4	29.33	23.03	22.79	89.66	98.04	96.26	147.27	130.63	120.36	115.47	101.09	102.54	67.07	49.36	76.76	51.41	74.35	66.16
CiPaw.04G030300.v1.1	121.81	66.24	59.03	36.1	35.74	32.19	75.78	94.7	114.92	95.6	100.08	92.45	83.15	93.23	93.47	176.99	105.06	109.79	244.98	221.79	267.48	192.64	183.56	148.06	255.54	246.9	304.62	208.7	212.16	277.61	78.92	68.2	115.24	124.43	121.19	134.03
CiPaw.09G021600.v1.1	137.01	149.66	155.2	35.86	31.27	41.86	34.16	58.09	34.72	102.19	101.31	103.56	220.25	107.57	198.43	144.22	108.66	125.33	24.88	27.23	34.94	51.2	59.89	36.35	84.7	99.89	131.49	144.5	94.15	81.18	132.17	184.75	159.75	146.02	113.57	141.53
CiPaw.11G093200.v1.1	59.07	44.12	51.63	102.41	109.95	100.05	196.06	276.09	274.14	223.5	237.61	249.41	60.59	55.28	55.27	63.19	38.01	52.32	29.33	28.11	31.51	103.25	103.94	124	169	165.95	223.03	151.86	107.53	122.52	40.12	17.74	32.32	36.75	29.44	43.81
CiPaw.04G039600.v1.1	226.93	245.86	220.79	441.37	426.13	385.9	345.49	328.44	327.33	356.12	382.47	362.67	266.07	258.69	250.56	222.19	257.88	234.54	259.75	259.46	244.31	406.46	388.93	355.88	316.6	310.33	279.15	253.16	274.21	285.27	227.63	227.45	225.65	264.86	315.09	251.42
CiPaw.05G084100.v1.1	12.55	8.82	7.99	183.28	204.6	227.99	102.48	110.03	95.35	131.58	110.17	102.83	145.43	110.63	145.64	89	108.82	108.03	11.07	9.71	12	100.56	117.45	101.03	45.66	52.81	51.32	57.21	29.04	79.88	71.65	148.4	77.98	94.24	155.07	43.51
CiPaw.11G013800.v1.1	159.07	141.09	150.16	244.01	298.29	383.1	370.68	191.1	174.88	170.53	287.22	148.4	120.89	83.8	119.74	95.92	72.93	84.71	57.64	59.96	64.75	127.74	128.02	144.25	65.13	65.24	73.26	56.56	61.92	66.93	107.67	130.41	103.88	147.81	103.63	96.91
CiPaw.02G075800.v1.1	0.39	0.62	0.34	768.68	501.67	922.65	374.92	396.15	303.91	457.24	288.93	290.38	133.69	37.81	73.16	35.4	21.55	41	0.5	0.33	1.31	159.73	422.99	271.13	46.63	33.59	39.83	69.51	10.85	59.17	9.9	59.52	5.85	11.87	17.58	1.24
CiPaw.07G039000.v1.1	24.11	20.41	20.29	8.66	19.39	9.18	26.12	57.09	46.56	41.66	38.17	43.81	254.09	405.07	241.8	817.68	556.48	811.96	34.07	26.06	31.53	69.85	39.48	72.2	190.19	72.16	129.4	122.86	87.53	242.77	44.17	66.81	81.3	70.98	125.18	111.68
CiPaw.07G176700.v1.1	173.93	172.39	163.49	416.02	362.06	332.8	315.46	304.22	275.62	218.15	278.52	256.2	250.37	217.34	236.61	176.1	265.23	223.07	186.43	192.84	185.47	307.75	394.88	321.85	233.75	192.77	179.03	136.5	180.67	175.98	181.51	205.07	171.93	171	241.17	149.28
CiPaw.10G022500.v1.1	138.03	159.92	147.37	385.41	374.01	352.9	293.92	267.64	263.68	256.8	268.06	257.9	243.11	225.39	233.39	163.67	220.42	166.68	177.14	174.78	168.33	344.88	381.74	347.21	265.18	248.9	215.64	197.97	211.41	211.89	205.06	212.56	193.02	209.23	216.37	217.04
CiPaw.02G083700.v1.1	207.84	227.34	219.4	47.96	50.26	58.69	44.53	66.05	41.96	100.97	121.54	121.67	248.98	131.95	239.49	170.27	114.51	124.71	26.81	22.01	27.04	72.37	82.97	47.69	79.58	107.57	119.93	132.22	100.84	79.35	137.18	177.74	187.77	114.1	109.79	149.97
CiPaw.03G023900.v1.1	255.73	241.99	221.15	192.93	201.49	210.65	205.08	195.69	199.99	216.75	212.17	218.99	221.71	272.92	268.75	282.2	326.54	269.79	288.41	335	314.72	255.12	246.72	235.17	302.21	264.29	329.21	345.75	291.38	304.25	314.51	241.35	326.92	406.77	253.22	335.9
CiPaw.03G034700.v1.1	173.04	192.79	175.86	46.09	50.13	33.46	45.12	67.58	46.18	88.66	75.45	103.03	170.99	145.92	147.18	56.95	97.52	95.71	52.33	46.45	43.07	33.11	34.36	37.06	109.06	137.85	135.57	116.69	94.59	80.82	121.37	91.98	132.79	117.58	88.5	139.32
CiPaw.12G082100.v1.1	14.32	12.69	15.13	263.93	363.38	325.54	160.1	172.17	132.16	96.53	137.16	94.36	169.79	118.29	232.7	31.74	32.58	75.41	55.18	40.22	43.2	87.33	68.12	84.77	31.43	31.74	32.88	42.8	37.77	40.43	106.97	89.97	160.12	59.29	59.56	78.59
CiPaw.01G203000.v1.1	12.66	14.85	14.31	116.51	120.33	114.58	69.92	48.82	79.91	120.57	144.51	112.26	22.94	24.5	29.23	105.64	107.27	107.41	6.85	16.33	28.81	218.76	183.96	156.54	64.39	74.97	48.98	53.25	37.34	75.28	47.78	117.17	35.11	122.29	83.6	58.1
CiPaw.03G007300.v1.1	78.59	53.78	66.42	160.87	205.23	158.5	115.03	202.6	113.49	202.07	250.98	126.43	279.41	249.95	206.35	181.19	201.61	194.47	88.59	84.44	50.34	92.18	145.11	97.85	133.61	46.58	40.16	167.96	172.5	148.57	122.53	179.88	162.58	201.13	161.92	183.75
CiPaw.09G044200.v1.1	181	161.35	194.69	150.43	164.71	108.38	150.75	112.8	118.39	81.57	98.26	107.65	231.46	131.97	131.77	87.55	65.48	110.23	218.04	230.97	238.21	180.76	100.77	86.84	43.17	70	51.89	76.32	103.8	66.48	58.53	54.64	93.56	33.18	44.85	53.83
CiPaw.10G032300.v1.1	49.74	49.3	48.96	187.75	187.59	246.91	304.81	395.22	312.77	342.34	323.25	261.52	248.63	155.68	263.44	100.84	69.35	74.25	104.74	75.93	79.39	107.31	122.05	149.48	136.74	149.38	114.99	86.58	126.73	107.35	58.06	93.46	89.99	76.17	135.78	93.01
CiPaw.03G113500.v1.1	123.71	141.51	117.02	398.58	365.98	348.72	283.34	284.57	259.01	247.7	253.86	246.2	235.09	207.05	211.73	174.93	199.51	175.44	145.64	152.93	157.64	315.18	317.19	279.22	225.85	184.48	196.46	164.09	162.03	158.36	153.47	169.88	167.76	193.72	210.33	176.52
CiPaw.04G084800.v1.1	349.41	420.23	335.1	256.4	264.82	210.8	301.94	239.3	268.43	315.32	335.31	351.23	235.84	275.76	253.94	254.84	249.79	249.7	536.94	543.54	471.71	278.66	306.7	262.74	317.41	275.17	269.41	307.3	385.2	347.62	345.54	320.59	345.3	410.55	352.47	449.61
CiPaw.14G066600.v1.1	126.97	145.35	129.73	37.21	36.56	40.28	35.99	52.72	35.54	87.71	78.89	96.84	156.57	107.44	168.18	121.86	102.3	95.53	29.58	35.97	40.91	51.96	50.15	41.22	107.21	115.31	145.67	117.75	83.7	81.94	146.05	176.3	137.45	121.66	94.2	127.9
CiPaw.01G174800.v1.1	149.94	128.23	135	7.25	9.17	2.57	20.13	21.28	28.91	54.25	78.17	67.21	63.72	144.93	93	81.58	100.45	111.11	124.24	106.05	109.02	78.07	64.62	62.33	125.38	161.71	134.53	154.09	165.07	185.11	146.06	65.3	169.49	128.85	164.6	179.07
CiPaw.03G101400.v1.1	94.99	86.73	104.14	245.29	309.76	287.25	429.86	464.82	516.08	256.67	378.89	281.3	150.48	102.22	125.98	114.75	78.21	89.33	67.57	62.88	66.28	148.28	134.73	136.06	148.19	125.04	175.03	107.54	114.78	117.61	69.58	49.2	81.58	47.61	58.53	68.75
CiPaw.07G138400.v1.1	242.71	223.03	252.92	20.27	23.67	19.58	30.31	38.22	36.94	58.23	58.48	52.53	64	114.19	80.37	150.42	91.55	118.66	248.37	223.3	224.07	59.77	53.96	50.74	130.29	125.92	119.13	103.76	147.3	128.03	118.27	98.93	132.2	80.73	102.36	85.21
CiPaw.03G008900.v1.1	280.24	255.6	269.71	237.88	259.11	256.09	184.46	216.05	175.54	268.88	228.29	231.04	228.31	275.21	244.67	300.52	309.38	299.17	425.19	432.47	438.58	334.44	362.43	353.87	305	339.96	379.73	331.12	268.8	331.14	307.41	260.43	331.22	408.91	336.46	355.4
CiPaw.07G136600.v1.1	404.88	417.46	425.61	87.07	89.75	73.41	144.58	151.78	156.74	177.54	218.9	191.95	168.59	216.33	177.39	272.51	247.39	270.55	414.25	434.23	432.09	208.02	219.79	217.84	230.1	230.56	230.24	224.46	250.63	241.94	262.2	222.51	253.52	272.31	331.25	299.57
CiPaw.13G120600.v1.1	82.91	106.85	89.39	19.62	22.8	17.63	35.44	37.04	28.38	47.23	36.29	54.84	190.57	142.86	150.95	111.8	135.86	114.41	9.56	8.36	12.74	13.7	13.55	13.22	46.91	67.95	64	70.04	36.54	38.63	135.52	179.55	120.17	118.07	93.36	101.97
CiPaw.03G150300.v1.1	106.47	112.53	96.76	232.36	202.59	190.66	307.6	178.57	232.28	147.72	134.84	161.16	177.33	97.09	127.73	83.95	87.98	90.51	188.48	194.59	173.46	139.34	192.58	178.65	138.05	183.65	155.26	121.92	124.37	87.07	88.07	128.4	96.76	91	50.08	59.28
CiPaw.15G171400.v1.1	234.95	226.61	183.24	373.8	372.98	327.32	316.54	319.72	329.44	321.91	375.65	305.77	305.72	299.12	297.1	260.43	269.36	235.48	254.29	231.17	212.75	394.64	345.66	353.93	345.38	274.4	238.13	232.28	267.97	275.79	262.74	264.41	274.15	215.27	321.77	258.75
CiPaw.05G037500.v1.1	39.48	48.32	34.26	69.5	63.76	45.22	36.83	88.36	70.23	143.73	132.52	168.27	108.31	148.55	132.13	27.13	124.17	101.86	4.84	5.71	8.99	96.33	117.66	112.59	167.58	219.2	200.12	134.44	92.54	106.79	68.27	84.82	70.31	47.49	55.52	173.27
CiPaw.11G111500.v1.1	3.69	0.64	0.26	65.68	81.46	93.75	126.07	216.95	104.33	121.76	196.94	146.14	100.06	57.18	89.82	89.21	56.08	37.24	14.1	0.31	3.13	78.48	41.89	82.21	190.32	411.42	272.57	153.96	73.2	268.32	79.39	53.97	127.37	99.32	67.52	18.27
CiPaw.07G149300.v1.1	308.12	278.55	265.59	55.34	59.82	50.08	66.53	80.4	85.59	94.37	104.37	98.64	75.67	94.95	80.49	94.52	93.4	100.44	330.04	299.85	295.48	163.93	151.77	149.16	198.2	188.15	194.36	118.53	175.22	124.76	159.74	79.03	173.53	118.24	111.85	190.24
CiPaw.10G137800.v1.1	49.12	87.1	56.4	96.13	74.21	71.47	324.23	191.86	253.79	246.19	303.28	326.73	93.38	45.52	59.47	50.62	149.17	75.49	16.47	18.69	31.32	71.96	60.6	47.29	169.16	163.56	201.68	203.87	191.03	153.93	74.36	115.17	81.27	99.85	83.33	122.02
CiPaw.04G153600.v1.1	259.08	316.68	302.22	93.66	107.01	116.83	76.13	92.69	73.54	70.62	64.15	75.69	201.41	216.24	208.59	184.56	216.11	166.72	109.05	116.45	122.07	99.92	100.6	86.46	100.73	98.03	111.34	127.16	99.48	104.51	210.21	251.42	229.06	197.05	165.51	205.51
CiPaw.09G054600.v1.1	97.69	133.66	116.11	24.88	37.44	24.12	14.31	21.2	15.85	34.49	24.25	25.39	57.17	99.33	100.65	83.93	129.63	92.63	197.62	182.92	167.97	98.19	77.78	93.17	104.69	97.16	102.33	119.92	134.56	123.69	162.71	186.57	141.14	338.38	328.21	384.08
CiPaw.15G146300.v1.1	169.24	140.34	180.04	27.18	30.24	37.68	36.58	81.86	48.46	77.73	88.68	102.97	148.43	87.85	140.84	133.04	138.58	84.54	27.94	29.51	28.54	28.88	37.79	16.78	39.02	81.41	77.96	42.51	36.59	44.52	83.16	128.45	53.52	97.71	108.22	96.52
CiPaw.10G004600.v1.1	1.9	1.93	1.62	20.62	17.83	21.31	141.95	53.77	104.58	194.86	117.71	187.2	167	58.4	144.77	14.35	58.21	54.13	15.67	17.82	14.99	45.68	53.23	81.5	88.2	82.12	56.66	220.66	100.23	125.45	99.48	66.78	117.68	14.6	26.6	21.65
CiPaw.02G181800.v1.1	166.34	185.41	193.88	378.09	362.2	367.71	355.01	363.92	349.66	352.53	416.38	380.71	293.1	218.94	258.74	219.27	197.8	186.94	215.88	215.98	220.88	401.78	436.08	395.07	227.04	208.73	205.47	174.95	204.74	238.56	162.92	196.56	173.06	144.69	189.01	185.61
CiPaw.03G156400.v1.1	23.56	22.99	22.6	36.49	40.53	19.82	73.82	67.17	93.14	136.34	160.85	167.34	96.39	114.53	98.59	55.68	117.57	111.09	19.97	18.39	18.38	80.77	78.58	68.68	206.24	150.41	183.64	259.07	297.13	304.2	139.47	109.17	116.17	96.13	132.88	94.19
CiPaw.03G191800.v1.1	117.95	150.76	163.19	24.93	19.25	27.24	21.64	44.58	22.81	78.24	69.22	81.31	173.9	97.25	159.27	77.01	75.26	67.31	12.67	15.37	15.39	29.22	34.45	19.76	70.15	76.24	82.91	109.53	80.42	66.52	123.68	180.98	119.54	75.19	88.68	96.39
CiPaw.10G108000.v1.1	93.79	121.16	100.64	29.7	30.62	22.57	21.49	29.41	21.31	46.69	45.52	52	133.44	138.68	146.99	84.84	142.95	126.73	73	65.83	58.47	41.87	38.38	42.59	83.08	86.84	80.08	99.92	88.33	63.78	161.73	136.64	167.38	150.13	116.04	194.69
CiPaw.01G180700.v1.1	191.13	185.23	181.27	376.51	389.51	378.35	355.53	331.49	341.67	277.81	268.32	258.33	199.77	185.56	197.35	219.9	200.4	194.53	227.22	241.41	225.91	257.18	294.72	300.78	271.56	277.35	260.69	219.54	221.27	203.11	157.44	143.11	151.14	182.47	160.67	142.04
CiPaw.01G088700.v1.1	166.06	157.09	167.57	32.17	32.6	33.41	22.1	23.71	18.65	36.14	52.5	49.56	195.19	148.67	183.33	199.75	112.64	147.6	91.16	70.32	88.27	29.22	27.35	24.88	25.87	35.17	35.39	73.33	43.12	36.34	104.53	200.88	131.62	73.35	91.25	164.04
CiPaw.09G190300.v1.1	233.33	235.02	212.3	40.63	41.45	29.39	66.21	77.14	72.91	122.63	131.62	128.01	121.89	176.88	141.41	187.61	177.38	169.35	136.98	135.4	121.58	59.19	61.75	82.15	102.4	86.03	83.81	128.67	125.87	126.5	151.19	110.58	133.38	165.02	212.45	136.08
CiPaw.09G178400.v1.1	0.59	0.2	0.14	90.62	59.29	79.93	70.8	122.01	95.44	247.6	249.39	268.77	57.88	22.84	31.23	1.36	7.12	5.93	0.33	0	0.45	61.19	270.53	174.27	84.55	26.54	105.55	91.28	8	88.91	10.87	60.74	25.28	22.86	17.75	12.42
CiPaw.06G004400.v1.1	390.33	402.77	392.12	435.65	480.69	412.08	465.41	420.46	450.42	329	302.13	326.02	423.26	539.13	457.48	456.87	523.93	461.65	514.55	514.05	529.79	427.78	473.49	514.26	424.33	441.03	386.26	326.14	360.21	329.38	474.36	481.33	420.43	410.36	443.82	386.24
CiPaw.07G192400.v1.1	159.05	145.57	147.2	95.2	113.11	102.19	90.43	103.76	105.11	127.38	110.82	119.43	171.44	230.35	194.03	279.11	293.19	260.44	194.48	186.03	212.65	202.26	191.08	225.95	171.68	191.83	177.94	183.02	197.18	179.73	217.21	288.76	218.49	241.16	252.24	266.77
CiPaw.01G283600.v1.1	147.55	168.78	160.81	296.51	267.94	243.9	276.48	287.12	284.14	315.59	360.53	321.18	228.95	200.97	201.03	171.63	180.94	163.61	145.66	141.86	137.63	357.39	360.96	288.91	228.61	210.68	225.24	171.67	170.39	184.25	141.43	169.93	141.91	173.79	195.55	167.1
CiPaw.03G084400.v1.1	0.81	1.33	0.93	415.94	179.54	372.4	429.46	314.14	285.75	281.52	244.66	218.79	145.29	32.34	36.48	20.95	63.58	85.03	0.82	0	1.22	53.06	49.86	43.9	55.2	82.09	67.22	86.85	52.07	148.7	25.58	85.14	47.7	12.32	21.85	12.87
CiPaw.03G101200.v1.1	38.91	30.72	36.71	131.31	150.88	185	188.03	291.55	228.26	205.86	230.68	206.21	136.83	86.52	136.02	71.57	79.21	79.47	15.14	14.15	16.89	70.31	72.58	76.98	124.09	85.47	97.37	77.09	90.63	111.67	62.31	39.04	62.22	36.53	49.36	51.32
CiPaw.01G199400.v1.1	10.4	10.27	10.92	72.85	58.88	53.56	49.19	79.52	82.27	141.5	169.08	154.75	79.92	119.7	93.74	126.61	137.25	138.31	28.18	24.9	31.85	101.95	107.16	163.27	232.18	218.95	149.9	197.28	162.05	237.19	98.91	71.91	83.4	118.64	141.9	95.57
CiPaw.05G207200.v1.1	86.07	98.86	100.75	396.4	302.24	351.6	605.21	350.38	611.05	381.93	503.15	560.23	141.86	112.72	150.87	79.19	73.94	84.59	20.24	18.44	23.11	104.58	103.04	86.13	147.28	156.92	157.28	136.51	188.74	114.08	115.67	102.66	159.18	50.78	48.74	74.08
CiPaw.04G006900.v1.1	32.39	32.94	41.6	36.34	33.67	39.81	38.07	68.95	44.63	86.12	60.22	63.86	143	105.85	187.41	101.66	81.04	76.32	1.54	3.38	2.79	29.45	30.37	30.55	103.09	115.66	115.11	122.66	98.31	123.26	134.53	126.54	143.12	92.96	124.75	90.18
CiPaw.11G074300.v1.1	100.14	150.57	144.75	137.67	131.2	115.65	62.38	65.57	61.45	89.74	85.23	88.06	117.56	65.84	90.9	67.72	83.34	81.57	10.07	18.54	36.73	311.69	221.64	176.72	231.75	236.52	288.45	239.42	187.51	144.52	100.77	203.27	136.37	84.14	103.66	202.42
CiPaw.02G120600.v1.1	35.02	30.73	28.73	9.98	7.25	7.83	55.52	24.44	59.22	71.05	61.58	131.24	99.93	127.69	143.31	18.12	127.09	69.41	28.88	19.28	22.71	63.37	48.89	99.25	218.26	66.84	89.45	101.44	145.43	92.51	223.6	89.56	201.71	108.32	173.66	175.2
CiPaw.06G166400.v1.1	39.6	44.13	49.53	20.24	20.02	28.58	31.34	50.54	29.82	94.22	66.22	117.86	279.1	128.23	311.62	180.74	114.04	122.98	1.56	2.72	4.26	11.55	18.47	10.15	46.5	54.19	66.54	112.59	40.79	46.48	123.75	137.13	110.79	114.67	88.13	106.09
CiPaw.03G004400.v1.1	118.41	72.34	90.25	496.46	409.01	363.55	255.76	111.49	223.21	91.33	93.53	141.28	109.71	92.22	99.13	24.76	30.03	33.34	30.6	36.95	36.64	112.24	94.81	107.02	70.96	53.18	61.87	96.75	147.64	38.61	45.82	40.65	67.05	23.68	54	38.01
CiPaw.13G119300.v1.1	160.56	180.66	178.45	10.57	13.18	11.21	12.08	22.17	15.31	32.04	25.88	35.77	147.83	203.45	182.9	196.37	208.92	202.38	45.69	41.96	47.86	26.67	19.04	23.2	55.06	53.8	53.87	62.51	53.89	44.2	174.34	186.13	170.7	134.05	105.2	114.53
CiPaw.05G236400.v1.1	92.91	83.3	81.64	41.37	61.56	52.79	65.83	75.24	81.92	52.57	54.71	51.09	61.46	67.57	62.62	82.43	75.1	77.3	160.2	171.68	177.73	180.62	174.69	149.5	156.74	183.94	187.8	117.53	96.61	117.52	144.77	150.72	135.28	217.83	154.03	163.93
CiPaw.07G143900.v1.1	8.26	8.62	9.27	109.77	80.26	72.38	151.13	128.21	179.85	99.64	117.5	138.8	73.8	36.53	23.45	13.53	33.44	29.75	7.6	6.82	6.95	63.75	44.12	44.27	72.76	81.84	123.4	107.77	117.87	102.68	36.18	72.07	61.82	19.89	26.68	20.26
CiPaw.13G107800.v1.1	187.78	220.85	205.61	543.06	520.43	443.58	299.21	326.93	299.61	297.43	319.14	278.91	301.06	250.88	257.86	208.15	267.7	229.91	204.8	197.23	211.06	446.49	436.76	396.28	283.01	258.82	245.84	197.07	217.29	227.34	218.97	259.78	216.68	280.06	301.32	261.29
CiPaw.04G106100.v1.1	245.74	223.47	260.29	8.35	14.13	6	16.84	18.03	19.76	11.85	9.17	10.03	42.86	94.57	57.85	134.07	117.36	104.23	288.31	253.32	249.84	38.91	33.92	28.58	42.76	73.14	64.53	61.99	89.38	78.55	61.94	16.85	54.21	54.04	62.04	66.47
CiPaw.12G010200.v1.1	94.68	93.89	95.15	52.19	57.64	47.72	29.29	38.28	32.05	50.97	44.7	49.16	147.3	208.8	178.81	132.96	219.19	190.5	115.81	110.08	119.36	59.38	66.35	65.43	86.02	72.15	77.88	83.44	88.28	85.79	216.57	172.51	179.02	159.04	152.38	216.16
CiPaw.06G145600.v1.1	69.88	58.16	72.39	52.47	51.71	45	68.27	96.87	94.66	126.98	124.59	126.13	108.42	119.86	124.11	104.37	105.66	89.41	47.44	41.62	48.09	60.4	54.8	58.19	179.11	144.82	139.53	194.8	250.91	258.28	142.39	51.51	138.18	47.19	122.34	167.49
CiPaw.07G041800.v1.1	229.08	254.14	240.97	160.31	235.21	135.85	145.28	126.74	120.89	144.41	130.97	123.03	119.47	152.32	131.17	83.21	136.34	103.92	236.21	212.11	200.53	209.58	228.46	322.28	169.8	270.28	173.79	162.1	156.59	139.63	198.04	248.63	178.04	169.65	269.23	104.7
CiPaw.10G112100.v1.1	66.19	62.56	74.64	128.86	121.64	125.98	127.76	165.88	159.39	160.88	145.9	183.6	96.54	94.72	106.97	85.22	78.79	62.95	63.52	53.24	49.84	111.67	101.47	125.33	249.73	256.68	237.92	351.42	370.06	324.67	156.63	66.65	156.53	75.26	109.11	163.03
CiPaw.06G036200.v1.1	101.91	144.24	136.74	13.71	17.17	11.58	42.43	44	41.9	63.25	43.42	83.02	127.29	116.49	115.03	75.92	132.93	103.8	22.83	19.87	22.87	21.46	17	15.59	96.79	98.59	101.21	96.02	81.84	66.51	124.12	143.78	131.25	87.14	84.77	146.84
CiPaw.09G188000.v1.1	173.09	220.98	216.97	3.66	1.87	4.64	5.29	14.49	8.02	47.31	58.64	72.62	188.47	60.55	149.3	70.46	55.1	45.34	4.07	2.23	2.61	13.61	14.93	5.47	47.77	58.74	72.99	85.77	41.79	34.74	127.45	216.21	95.96	94.79	56.22	62.03
CiPaw.03G246100.v1.1	180.11	140.36	181.27	286.61	348.37	319.28	124.58	158.99	130.91	169.19	108.18	103.29	206.29	132.29	174.51	138.48	163.22	191.39	35.35	23.17	20.87	393.1	331.77	320.57	154.76	171.69	221.38	232.93	169.71	200.89	72.38	119.08	103.57	127.95	168.02	89.3
CiPaw.09G017000.v1.1	132.01	107.6	120.01	14.04	23.81	14.49	8.97	14.12	12.67	21.03	15.26	14.28	41.62	75.19	50.26	98.28	107.59	104.68	115.68	96.8	103.72	90.17	63.11	75.88	41.71	43.27	40.73	48.73	46.45	42.53	78.44	42.63	62.06	136.51	147.59	98.41
CiPaw.15G153900.v1.1	49.96	39.88	31.89	84.3	102.14	63.38	357.29	271.78	383.2	226.89	228.65	271.01	119.57	129.21	93.99	190.47	106.45	134.4	104.03	105.03	104.02	63.99	64.68	68.84	172.69	148.53	166.92	128.31	138.32	165.35	68.6	63.53	90.3	52.32	52	68.35
CiPaw.10G096300.v1.1	202.12	199.42	180.22	510.56	485.91	499.13	357.61	373.85	350.18	361.87	371.71	331.48	302.94	235.68	262.32	246.22	237.38	222.41	210.95	215.11	208.45	450.27	486.03	412	268.64	257.68	230.49	193.23	225.4	225.43	199.95	209.02	196.29	218.07	250.53	224.78
CiPaw.12G133200.v1.1	206.06	198.9	180.76	24.44	33.62	32.67	20.62	37.03	23.08	47.76	50.8	46.65	150.57	121.93	150.46	109.38	93.54	116.73	41.38	42.92	35.86	48.04	44.95	41.59	67.44	82.07	86.71	134.38	100.39	71.41	114.17	124.41	160.12	121.4	99.79	150.57
CiPaw.01G256100.v1.1	7.7	9	7.77	125.9	67.77	61.94	447.73	123.07	285.09	72.01	52.53	71.67	139.75	51.42	66.48	37.64	71.94	121.52	154.84	191.37	217.06	192.99	153.19	167.59	53.75	100.14	61.81	69.97	36.36	37.47	86.28	102.26	66.64	9.18	21.11	23.93
CiPaw.09G114400.v1.1	266.59	276.23	313.32	4.57	6.7	5.23	6.07	12.88	6.04	20.2	20.16	24.23	98.99	52.32	85.45	71.77	70.66	86.84	39.53	88.27	116.73	24.37	15.4	15.88	47.78	44.72	68.64	108.07	108.14	53.86	92.96	109.2	162.09	76.86	98.53	111.45
CiPaw.11G046300.v1.1	36.5	35.33	33.74	222.46	163.49	193	242.64	160.93	220.22	108.46	137.14	138.53	60.75	69.52	57.4	53.6	55.37	49.32	37.14	35.83	34.93	122.19	101.58	104.23	125.91	98.54	109.19	97.82	111.76	149.69	61.32	116.54	79.41	41.91	60.33	57.75
CiPaw.08G089700.v1.1	122.12	94.09	100.83	191.28	183.43	259.79	130.72	197.84	137.95	163.49	123.04	103.99	119.87	54.5	105.71	82.35	46.43	43.29	50.09	40.88	40.85	130.14	137.52	156.78	131.41	149.38	155.76	206.25	138.76	173.99	69.14	39.31	109.97	17.63	70.34	74.89
CiPaw.01G013600.v1.1	251.12	274.91	282.18	15.7	19.1	18.92	23.4	40.85	26.97	57.66	57.41	67.02	132.43	100.86	135.94	90.11	77.81	76.85	21.36	22.68	24.08	26.54	24.89	21.65	67.59	66.06	94.53	94.84	78.98	57.83	117.93	147.98	118.01	75.69	65.67	88.55
CiPaw.05G062000.v1.1	62.82	68.25	72.34	100.05	128.06	154.36	32.58	50.5	41.48	104.5	81.29	74.44	181.79	174.08	225.52	432.81	390.92	344.55	13.32	11.81	26.23	148.77	153.57	166.02	81.15	87.44	75.38	108.24	60.63	118.68	76.81	111.73	80.35	144.44	129.92	131.2
CiPaw.14G125200.v1.1	20.83	21.71	11.47	106.93	73.81	146.08	238.75	227.57	112.49	320.1	73.66	91.8	95.33	182.3	133.58	56.03	32.64	30.94	19.58	10.96	8.18	15.72	19.68	11.83	5.17	3.9	10.18	16.65	34.83	45.18	141.45	118.65	116.08	81.22	47.45	167.49
CiPaw.10G092500.v1.1	293.5	328.92	286.45	30.32	55.82	33.13	82.64	62.27	66.74	62.22	58.98	52.72	63.05	72.04	75.11	67.54	85.6	73.38	257.52	265.48	213.08	126.49	128.2	180.89	116.14	116.87	124.72	111.03	145.54	101.73	120.04	80.68	109.52	133.19	153.13	122.83
CiPaw.05G020800.v1.1	20.37	18.89	22.12	81.12	59.08	66.52	206.79	123.68	186.37	117.99	121.21	143.52	207.67	91.07	150.37	75.78	54.56	93.67	39.4	38.31	38.69	48.23	75.08	97.94	112.23	122.36	115.82	219.19	211.22	142.19	105.64	58.14	113.62	13.61	40.28	49.4
CiPaw.03G051300.v1.1	14.09	17	16.53	149.88	107.15	171.99	68.96	63.38	44.91	58.6	34.73	34.68	217.88	207.04	255.57	210.95	187.68	109.88	6.92	13.09	26.54	51.55	59.99	61.66	60.78	42.62	47.95	81.25	62.12	78.55	172.18	176.8	195	82.58	80.8	140.74
CiPaw.10G061300.v1.1	116.28	133.08	152.78	12.53	11.72	13.21	17.01	30.65	20.19	44.42	44.62	50.33	103.25	107.84	120.08	102.33	90.72	64.46	23.34	25.67	25.73	27.65	24.21	12.74	73.26	103.76	124.98	68.16	58.81	57.96	131.79	162.83	88	68.42	69.17	106.3
CiPaw.01G071700.v1.1	460.59	484.17	493.3	267.96	301.62	284.92	440.25	483.26	453.01	484.59	427.65	487.47	415	473.72	442.94	526.76	448.66	497.06	598.79	548.28	539.77	349.68	328.44	382.27	484.71	496.5	543.41	429.58	428.92	439.22	403.2	356.46	420.71	452.02	404.21	418.56
CiPaw.06G174500.v1.1	120.04	112.69	115.16	178.95	166.03	150.13	238.43	160.79	201.19	150.3	148.92	137.96	113.75	65.24	83.77	95.46	70.58	81.85	195.28	237.56	255.67	139.56	188.02	195.81	123.84	140.49	115.37	90.46	98	80.32	70.17	73.7	66.23	46.17	47.92	48.99
CiPaw.03G222300.v1.1	494.19	486.77	491.99	243.96	252.15	228.38	286.29	295.93	299.79	275.31	318.83	286.96	313.41	370.64	336.64	419.86	354.96	386.32	621.52	616.39	587.76	360	356.52	338.4	347.86	343.77	293.26	295.76	359.36	358.15	367.68	339.76	363.17	303.28	318.49	324.08
CiPaw.13G002200.v1.1	199.26	245.25	218.93	486.93	496.4	407.28	274.76	316.84	302.44	306.56	340.54	300.51	287.53	298.68	283.76	234.68	333.73	267.58	222.01	212.07	218.58	422.36	449.96	412.11	352.91	339.09	329.77	289.48	285.7	266.6	281.46	287.62	254.72	418.78	387.95	320.42
CiPaw.13G088800.v1.1	54	41.92	49.2	213.2	246.19	267.4	103.52	112.84	99.62	124.68	59.53	54.11	72.53	109.27	121.96	98.84	98.23	93.99	73.32	69.01	92.94	352.62	360.3	396.09	135.19	138.58	146.6	170.36	97.25	189.53	108.89	264.58	139.8	156.37	158.45	121.55
CiPaw.13G141300.v1.1	166.99	149.64	147.16	184.2	221.63	204.45	240.8	232.21	242.2	233.33	231.03	230.76	169.59	150.16	151.59	223.13	159.62	178.08	263.33	263.64	268.22	163.95	218.59	203.6	236.15	258.94	274.32	190.35	204.64	147.09	129.29	116.9	124.25	155.81	103.02	101.99
CiPaw.03G192700.v1.1	223.38	280.8	240.92	513.77	498.31	400.97	374.29	345.01	354.94	310.14	339.83	331.15	308.83	306.99	290.1	265.49	325	283.02	244.54	237.11	243.29	427.56	494.47	410.53	320.72	305.68	263.03	240.15	264.77	267.05	261.94	282.92	242.02	299.59	369.09	276.87
CiPaw.03G003500.v1.1	99.77	105.43	115.04	53.64	73.69	68.99	99.55	107.57	84.09	110.35	102.57	111.7	316.4	238.16	235.8	179.19	188.65	158.56	74.21	80.31	97.34	86.27	64.2	59.83	121.28	148.89	185.14	153.9	112.21	133.12	246.98	230.58	218.62	217.25	187.2	221.88
CiPaw.15G058800.v1.1	102.39	118.28	106.11	125.78	177.92	129.86	64.97	58.66	77.52	55.23	77	83.99	209.51	287.53	165	364.13	201.59	306.67	139.87	140.71	120.85	329.38	224.77	127.41	42.67	132.37	104.48	77.1	116.55	48.74	98.2	75.6	131.35	84.65	102.35	58.47
CiPaw.14G130400.v1.1	118.41	159.7	149.37	21.16	21.61	27.72	20.86	22.89	13.95	31.41	29.61	31.87	192.67	184.05	180.15	161.93	229.24	243.89	31.43	30.85	44.78	37.99	22.88	22.52	55.79	44.93	41.59	102.46	106.18	59.64	117.34	250.44	265.49	100.95	112.43	127.81
CiPaw.13G053200.v1.1	209.66	207.12	212.64	86.47	128.04	104.97	62.58	81.24	74.37	90.41	97.01	80.68	194.09	185.66	188.8	207.46	165.56	161.64	196.56	202.65	220.55	161.62	164.11	147.37	101.3	117.25	115.21	120.65	128.8	112.4	160.82	144.23	163.96	123.62	142.05	129.22
CiPaw.01G298800.v1.1	184.12	250.48	244.89	1.11	1.45	1.14	3.05	5.57	2.14	25.06	21.16	32.6	113.39	50.71	85.51	60.96	44.75	66.39	3.97	5.59	6.93	8.95	4.59	4.09	43.46	51.27	71.53	107.41	60.46	35.73	104.23	184.25	99.28	96.87	45.84	71.37
CiPaw.07G024900.v1.1	129.65	155.82	173.36	6.97	3.97	5.8	6.94	16.87	6.6	39.91	22.25	36.75	118.3	73.26	99.9	63.07	65.92	72.94	8.29	8.51	9.59	17.48	22.37	9.98	49.89	64.51	83.82	129.87	64.7	61.48	98.67	206.18	92.28	81.98	51.18	85.87
CiPaw.05G057500.v1.1	24.41	9.37	17.23	301.85	186.53	360.28	102.91	116.74	59.86	26.07	23.95	16.53	16.21	30.82	10.44	62.19	92.85	104.68	32.85	11.31	9.39	33.65	49.23	131.2	38.36	13.09	6.95	18.86	95.83	54.89	68.03	81.91	102.42	96.96	214.45	442.58
CiPaw.05G207700.v1.1	141.44	182.9	166.54	409.65	362.89	344.92	299.07	263.53	300.76	251.26	271.06	272	203.23	193.38	191.45	172.98	242.94	184.71	176	154.59	139.9	311.35	296.75	291.57	251.69	237.7	215.45	205.31	163.67	203.77	174.66	186.14	177.71	290.19	246.25	207.85
CiPaw.10G014400.v1.1	14.66	9.91	7.97	70.79	53.71	56.79	14.03	20.47	15.23	29.48	11.41	14.97	56.04	108.59	92.24	194.08	177.61	97.23	5.03	6.45	12.3	77.15	57.78	71.24	49.97	45.17	33.84	57.8	22.16	34.76	121.16	378.12	77.09	253.43	142.79	133.37
CiPaw.01G194500.v1.1	112.9	104.41	107.77	212.87	222.95	271.28	276.65	261.67	228.06	204.37	160.84	159.83	169.43	172.32	192.01	85.95	88.17	86.71	124.85	117.32	134.41	162.88	171.78	152.49	293.2	172.02	243.05	132.47	153.97	185.21	178.6	128.03	144.94	89.1	255.69	167.87
CiPaw.11G145400.v1.1	98.45	79.75	70.97	264.31	219.02	241.66	349.94	317.01	348.86	299.82	331.37	340.39	235.12	159.52	182.32	177.99	196.58	168.88	108.38	106.64	110.32	210.93	183.89	184.95	231.46	203.42	238.94	204.9	219.53	208.17	149.41	199.18	184.55	134.67	141.92	161.33
CiPaw.04G091400.v1.1	97.41	125.28	122.39	28.53	36.2	34.47	32.26	62.31	36.63	71.58	56.91	75.58	365.61	284.14	386.56	170.03	251.26	233.63	51.18	49.58	52	39.43	46.8	42.73	72.47	76.64	84.6	87.45	66.15	63.59	191.24	210.75	216.96	129.27	117.11	148.12
CiPaw.02G132700.v1.1	123.18	143.05	118.97	372.05	343.09	295.47	236.09	218.68	234.78	218.61	244.82	226.25	203.41	160.02	160.42	131.02	201.41	185.33	145.94	143.1	142.31	288.69	306.76	292.82	250.57	250.8	236.23	199.85	184.66	180.76	167.21	170.25	173.61	242.84	220.51	225.61
CiPaw.04G102800.v1.1	94.59	93.28	86.38	154.33	184.76	157.73	52.71	63.75	60.62	84.07	61.6	50.93	84.85	93.11	91.53	98.53	140.88	113.01	198.63	175.07	190.96	245.34	221.07	244.66	79.45	63.07	62.41	103.46	86.32	98.72	161.05	285.03	137.74	284.14	258.75	214.72
CiPaw.05G145700.v1.1	50.89	53.58	54.98	11.39	16.46	9.71	19.67	25.18	18.61	28.13	17.27	23.18	152.25	94.16	113.16	103.45	114.93	96.34	4.11	6.59	6.93	15.61	13.81	12.69	90.12	66.83	88.89	94.63	94.61	84.82	123.13	161.29	124.34	60.18	75.33	108.85
CiPaw.12G122900.v1.1	220.12	186.14	177.24	93.82	106.39	72.84	112.99	126.9	161.63	132.75	149.42	169.24	156.43	169.6	161.41	168.83	150.2	133.76	204.11	181.67	169.3	192.64	193.81	241.52	406.02	388.17	330.49	532.71	712.83	487.95	262.25	93.24	312.18	76.01	139.84	269.62
CiPaw.04G183100.v1.1	261.27	252.28	260.88	193.18	168.97	193.66	176.04	207.27	195.48	321.04	304.78	282.02	239.13	277.8	260.78	243.55	244.44	265.24	193.33	164.91	148.33	199.59	194.82	208.75	230.38	207.28	194.93	383.71	349.41	313.05	239.8	198.78	220.55	234.99	332.17	256.34
CiPaw.05G014300.v1.1	496.17	543.74	417.5	36.31	34.48	20.33	51.07	25.3	32.89	21.94	19.6	17.93	43.89	59.6	60.26	141.57	153.31	183.05	554.39	630.05	551.63	56.76	39.55	47.82	61.02	58.18	39.91	89.3	98.67	47.45	271.67	410.43	265.31	812.64	263.46	426.04
CiPaw.09G051200.v1.1	19.4	5.2	5.62	135.04	133.2	181	114.35	114.04	94.77	109.34	80.47	63.47	32.57	25.8	31.51	49.46	50.81	51.5	16.08	15.45	19.59	183.54	163.01	203.86	47.99	32.03	46.44	57.3	44.19	60.85	87.7	201.05	92.49	261.96	96.28	130.65
CiPaw.03G258100.v1.1	186.34	182.68	175.8	123.51	131.25	118.01	152.9	188.92	225.02	217.02	178.77	234.3	167.15	207.69	199.29	177.9	171.12	164.2	153.61	137.65	131.63	202.05	184.68	251.11	410.08	373.05	352.39	404.03	491.25	450.42	256.77	114.15	281.76	97.8	162.68	224.87
CiPaw.14G038700.v1.1	385.09	429.92	357.77	524.79	479.23	447.21	431.84	428.03	491.63	398.6	441.53	440.03	391.84	362.85	381.33	288.79	340.01	357.67	470.43	418.05	405.12	412.95	564.97	519.16	453.67	370.76	352.37	330.94	405.28	392.05	356.01	425.63	379.59	318.07	375.34	326.2
CiPaw.11G139900.v1.1	167.17	188.88	196.74	388.79	385.35	358.83	309.61	298.34	276.95	283.14	293.07	290.11	256.91	232.37	259.17	163.87	223.3	192.71	237.51	225.68	192.93	349.33	380.26	349.73	271.7	295.56	273.67	221.18	205.21	225.4	215.43	210.18	187.07	280.03	273.17	219.69
CiPaw.05G011500.v1.1	33.2	38.75	39.58	83.17	126.19	121.78	338.87	300.32	282.72	222.34	293.01	294.52	233.9	92.88	109.42	91.42	41.88	62.61	7.64	7.52	8.52	8.86	7.46	9.09	70.03	108.78	111.81	105.59	71.45	73.33	58.82	114.9	56.56	60.46	25.79	45.5
CiPaw.03G053800.v1.1	21.39	20.39	21.94	74.35	75.89	83.36	124.7	115.15	144.34	133.87	138.28	134.15	43.05	29.46	36.62	23.08	33.38	25.72	9.86	12.05	8.7	117.81	107.9	109.6	107.17	88.1	103.42	104.21	81.89	95.42	43.47	54.7	39.11	49.98	49.92	29.14
CiPaw.01G211800.v1.1	173.75	154.4	174.31	18.08	30.02	22.47	136.63	198.87	179.99	207.22	209.44	241.63	162.72	168.92	160.38	162.88	187.19	181.71	108.97	106.72	101.79	72.59	77.06	58.3	172.03	158.56	166.99	205.31	206.02	251.51	179.09	92.73	163.61	103.83	137.2	118.68
CiPaw.06G041600.v1.1	137.37	154.13	128.8	378.82	361.07	311.74	261.75	242.67	231.4	182.97	226.61	205.21	223.45	199.79	206.34	138.67	198.52	158.12	132.31	154.54	131.35	315.26	332.59	311.63	227.4	173.92	145.43	137.63	171.84	160.46	165.42	197.94	162.85	137.95	192.51	178.91
CiPaw.02G168200.v1.1	39.6	37.73	36.86	130.1	109.45	123.41	130.04	153.16	163.96	187.87	156.82	160.83	86.78	80.79	87.01	78.41	97.85	99.23	91.33	78.02	78.47	164.96	188.72	179.01	148.7	149.13	177.2	179.8	179.84	244.76	127.45	179.24	130.73	135.71	169.84	140.08
CiPaw.14G108900.v1.1	109.29	85.83	70.15	22.54	22.14	11.7	16.52	11.7	16.63	16.28	17.42	14.64	25.55	50.28	40.76	75.45	147.43	165.35	104.84	114.84	108.3	66.99	49.4	54.53	54.99	31.42	33.6	56.86	55.58	57.86	231.46	334.12	212.59	468.65	290.61	293.02
CiPaw.06G173400.v1.1	21.41	18.4	18.11	100.1	66.72	108.03	150.39	117.71	124.52	104.05	87.58	67.45	95.11	97.34	108.1	289.92	207.07	158.42	51.01	41.47	45.91	32.46	19.83	27.41	109.1	57.77	55.72	39.83	48.68	53.34	122.91	127.47	83.24	152.24	159.62	160.3
CiPaw.06G111700.v1.1	44.16	53.65	49.05	90.93	91.46	60.62	124.87	105.68	114.32	99.67	112.76	144.92	155.73	170.06	146.62	128.09	228.97	195.62	154.63	143.52	147.76	74.96	59.89	85.53	184.01	159.47	153.82	160.09	156.94	124.1	203.03	226.98	180.48	238.95	200.78	357.37
CiPaw.06G123800.v1.1	253.71	252.23	204.76	255.96	239.13	218.7	151.92	160.89	151.47	215.96	217.13	191.42	194.25	171.42	168.16	213.97	225.61	208.38	305.22	345.83	321.94	272.79	293.21	223.85	151.31	137.69	138.32	152.62	177.12	159.07	159	151.26	173.05	186.33	185.96	207.9
CiPaw.04G015400.v1.1	70.68	70.16	60.4	193.03	205.33	209.46	51.24	58.75	49.7	64.29	61.86	51.91	128.15	109.01	115.7	118.43	138.19	119.21	77.59	81.96	98.59	170.96	198.62	205.75	69.8	60.29	51.54	60.93	62.98	62.37	113.86	149.04	106.83	128.21	121.2	124.39
CiPaw.04G076400.v1.1	228.99	228.68	185.97	486.37	470.59	409.64	307.08	306.53	286.39	306.24	339.96	287.42	344.75	288.04	297.87	256.64	327.49	291.64	241.72	271.13	267.91	409.17	434.67	399.49	296.61	275.54	223.24	249.56	251.01	217.2	235.07	236.86	254.75	350.86	312.62	264.39
CiPaw.01G153800.v1.1	124.73	151.26	130.71	373.43	353.84	316.55	266.38	210.74	217.12	205.58	230.35	210.52	175.73	173.76	179.71	150.17	199.38	165.8	178.78	183.63	162.93	307.72	303.5	307.6	240.31	205.36	174.25	181.23	227.26	244.46	247.24	314.69	238.34	237.92	265.36	286.84
CiPaw.02G006700.v1.1	232.89	217.8	222.86	575.5	468.31	527.29	368.81	363.57	357.09	284	277.39	263.24	311	320.08	303.4	306.48	337.63	327.97	335.16	366.63	342.86	457.7	409.21	396.23	336.69	298.52	312.43	292.23	280.82	286.82	255.91	346.4	299.9	362.16	386.97	297.65
CiPaw.13G093800.v1.1	322.75	368.31	323.17	456.24	444.37	369.61	410.67	350.76	386.41	292.16	367.79	342.9	343.06	402.45	360.18	289.52	415.85	400.76	356.88	375.64	367.76	478.04	471.89	491.05	497.56	450.99	404.9	402.43	453.46	434.33	397.11	456.05	374.92	363.44	436.9	390.17
CiPaw.13G005300.v1.1	133.74	127.57	128.43	37.85	38.2	37.08	27.6	36.99	33.14	51.39	49.21	53.05	83.1	115.46	97.14	100.22	135.06	141.72	139.53	125.54	124.02	49.57	48.56	49.91	82.42	67.51	72.1	74.96	95.91	85.98	140.16	114.43	133.91	115.66	122.95	155.64
CiPaw.12G085800.v1.1	96.24	111.06	111.04	139.23	129.16	155.34	94.76	95.04	84.67	107.14	79.13	80.88	226.87	321.36	273.03	329.78	336.59	230.72	92.72	125.9	133.23	127.92	172.36	138.9	127.57	127.67	133.91	169.09	102.78	128.67	229.68	422.16	209.47	267.65	213.52	236.68
CiPaw.01G062500.v1.1	317.97	351.37	308.7	123.15	131.09	120.58	147.36	150.54	148.94	174.08	153.61	162.26	185.85	244.2	221.75	308.2	280.86	288.65	523.82	555.22	466.35	180.04	161.04	176.34	233.54	157.47	181.99	184.31	201.58	190.9	172.39	157.16	221.83	267.95	216.2	298.29
CiPaw.10G137400.v1.1	138.7	169.02	142.13	423.29	404.86	343.29	305.87	267.98	285.85	239.93	264.33	258.55	250.7	230.54	235.05	143.64	224.44	194.21	184.87	205.16	194.15	387.89	428.47	368.9	331.7	352.48	280.68	195.81	209.91	213.53	212.49	197.63	194.45	222.41	275.32	215.88
CiPaw.02G179500.v1.1	152.47	173.4	166.57	363.31	317.25	306.97	277.25	258.28	260.55	252.96	277.28	255.57	234.24	201.57	196.28	158.79	204.19	179.85	168.11	156.29	180.6	350.47	329.46	288.55	254.77	244.9	217.95	184.5	193.22	189.64	166.38	179.85	174.45	205.85	229.13	188.6
CiPaw.07G091900.v1.1	78.42	80.67	69.54	25.1	30.7	19.58	20.44	29.91	26.86	41.77	51.07	48.44	82.17	139.28	116.28	106.44	121.61	135.03	110.61	100.18	96.27	59.62	52.01	56.33	109.59	96.56	89.09	81.27	108.78	96.43	147.67	150.31	146.77	162.75	137.29	176.39
CiPaw.13G022900.v1.1	141.13	153.96	168.71	352.72	332.12	311.1	282.63	249.03	255.7	225.6	238.86	239.08	204.46	185.73	175.2	153.52	177.94	164.64	147.79	134.49	150.31	264.72	273.86	276.96	235.05	232.75	213.82	177.48	184.2	206.79	154.56	184.55	158.71	205.73	240.95	204.61
CiPaw.11G188200.v1.1	263.76	243.56	264.15	75.38	98.43	79.9	114.21	135.73	141.18	156.14	164.45	174.64	159.46	230.17	183.22	189.76	208.11	187.05	329.81	344.36	329.43	231.35	211.18	194.02	225.39	243.9	213.72	242.8	279.27	301.95	273.28	175.7	240.39	192.37	251.63	246.34
CiPaw.07G211900.v1.1	209.82	207.75	271.19	102.16	53.57	92.15	165.41	170.93	197.23	118.09	138.79	135.7	169.3	42.11	132.15	76.3	128.01	110.57	44.43	47.29	69.4	28.68	41.75	39.89	14.54	1.28	2.93	38.96	34.85	42.59	75.99	74.13	74.81	90.5	66.48	29.17
CiPaw.13G094600.v1.1	252.24	398.18	259.2	0.37	0.75	0	3.1	6.9	4.12	13.45	25.69	44.52	455.04	590.14	225.63	200.31	107.48	304.77	32.43	28.43	2.15	0	0	0.73	91.13	209.6	105.6	425.68	757.85	302.19	12.88	75.6	259.53	8.56	22.87	5.44
CiPaw.12G075800.v1.1	64.61	93.09	86.78	23.13	23.56	25.16	17.28	30.3	22.11	49.93	49.51	57.15	145.01	110.82	126.54	121.53	97.55	101.19	13.8	19.04	24.26	39.61	20.45	27.05	69.56	62.24	78.74	117.76	79.34	61.03	110.16	236.92	111.06	74.87	81.09	101.11
CiPaw.05G168500.v1.1	480.94	453.92	422.63	541.14	552.76	475.21	506.51	584.22	549.28	461.85	453.57	452.07	437.72	455.4	452.53	420.03	512.55	496.57	523.32	525.85	509.52	631.6	634.14	672.34	592.36	528.18	470.5	427.04	464.02	466.46	394.35	440.77	406.88	435.75	495.54	411.47
CiPaw.09G208100.v1.1	255.29	244.52	260.72	136.71	161.82	142.59	176.27	146.58	167.74	191.38	190.46	181.94	150.48	195.22	171.74	235.56	229.29	226.1	294.44	285.1	291	183.3	162.85	172.51	199.08	225.47	223.87	280.71	252.64	265.79	214.34	164.63	192.25	305.21	272.3	212.61
CiPaw.09G124700.v1.1	201.01	195.71	195.94	59.87	65.32	47.4	88.32	101.84	97.02	108.54	120.45	100.09	56.9	79.94	68.19	42.32	53.15	43.69	200.22	202.84	189.96	110.74	117.55	131.53	190.27	176.88	185.93	145.18	143.86	128.82	84.54	36.28	83.07	71.41	79.62	86.81
CiPaw.06G026900.v1.1	142.55	144.74	143.66	198.18	220.73	197.3	153.95	147.32	153.93	103.1	108.83	100.17	168.7	204.06	162.62	162.89	219.58	181.98	239.07	238.42	239.2	215.02	244.2	218.68	132.41	120.39	102.76	79.82	114.3	106.27	169.61	189.86	164.56	119.4	192.3	139.91
CiPaw.10G146100.v1.1	68.19	57.83	42.35	127.26	116.17	112.55	21.6	30.63	24.01	51.26	36.1	38.64	78.02	158.65	140.95	64.42	189.6	133.73	111.63	105.64	113.19	94.08	119.58	122.28	90.9	77.53	84.17	92.54	64.32	58.4	204.85	154.22	198.4	317.84	193.8	217.73
CiPaw.10G147700.v1.1	56.69	57.94	67.54	8.02	12.08	14.65	6.47	28.75	12.04	64.08	50.73	71.89	282.12	190.97	363.28	87.46	100.15	81.98	11.7	16.2	23.63	7.61	6.2	4.73	25.95	27.34	32.85	74.31	34.54	45.74	188.03	190.24	159.42	113	105.03	84.97
CiPaw.07G059100.v1.1	18.89	16.08	15.46	404.86	390.85	439.88	1292.83	1023.56	1034.9	362.29	605.38	433.92	62.11	68.63	64.29	68.86	69.12	90.04	24.13	22.03	23.61	83.99	43.22	68.88	72.32	60.34	84.51	57.77	63.54	76.35	29.32	16.08	23.08	27.07	34.23	36.66
CiPaw.13G087800.v1.1	102.17	113.6	100.05	218.75	217.66	227.46	210.61	190.09	190.92	208.76	207.32	204.2	168.37	170.45	158.43	159.29	127.66	136.1	121.05	116.4	116.87	202.95	199.92	180.59	160.14	131.43	160.91	140.08	142.66	143.37	111.59	110.69	110.99	113.87	109.93	104.35
CiPaw.12G108200.v1.1	10.2	5.63	5.5	49.71	39.34	27.59	70.34	59.45	67.94	206.67	245.39	162.36	45.74	131.17	77.52	23.03	74.06	62.86	4.36	8.16	9.58	69.6	81.74	62.01	75.35	123.82	112.11	119.92	44.87	104.06	104.91	51.21	31.86	150.39	134.28	61.3
CiPaw.13G078200.v1.1	66.11	58.95	60.53	267.66	200.64	272.37	318.68	345.89	375.48	185.48	178.77	245.45	56.58	58.95	46.3	36.52	38.43	37.4	40.35	41.55	34.86	105.4	84.21	105.19	184.04	151.13	222.3	142.87	171.69	142.72	44.86	64.79	50.95	38.05	35.6	38.07
CiPaw.01G077000.v1.1	126.2	159.43	148.57	18.62	17.55	14.3	14.44	27.64	18.72	42.95	41.68	48.04	109.08	102.71	106.19	111.22	107.31	99.11	42.96	48.72	61.91	78.5	42.32	31.5	51.22	65.15	63.81	73.4	63.19	52.16	125.35	160.51	120.38	102.63	112.38	147.36
CiPaw.06G040800.v1.1	220.54	121.59	121.43	80.04	105.96	100.8	80.46	73.95	66.59	86.81	77.83	66.76	95.7	156.41	125.58	186.13	230.99	247.08	135.79	135.43	136.8	149.91	140.38	159.71	120.28	113.61	99.15	134.33	144.76	151.93	553.2	860.36	442.22	933.02	378.16	455.8
CiPaw.07G227900.v1.1	161.32	166.41	184.56	26.55	26.37	23.69	33.97	38.2	30.49	53.16	49.49	51.35	98.71	144.85	129.09	116.94	125.7	117.27	37.87	37.14	36.73	40.85	55.27	39	66.62	91.22	85.09	93.64	70.23	71.34	105.59	103.69	108.6	95.36	93.65	105.47
CiPaw.04G157500.v1.1	111.78	85.9	78.82	25.03	29.02	18.34	48.03	49.83	43.14	35.71	30.26	33.69	67.97	141.27	87.54	122.88	143.62	104.32	78.54	110.66	118.55	20.52	16.55	22.9	74.59	67.74	70.31	74.38	54.8	72.27	127.53	152.92	87.96	182.87	197.32	130.59
CiPaw.05G151400.v1.1	130.38	110.8	117.14	161.54	168.43	163.02	190.37	198.46	231.35	181.75	200.34	256.08	200.94	329.45	267.71	179.85	208.55	186.98	99.03	95.83	92.65	180.38	170.5	182.98	424.78	464.61	422.19	326.49	339.38	360.93	233.4	170.12	235.57	207.71	241.66	157.34
CiPaw.07G007000.v1.1	122.47	157.79	149.9	284.39	291.1	262.68	242.36	233.41	228	248.13	281.96	244.3	204	197.15	201.95	140.19	193.91	159.09	181.34	158.18	146.08	277.33	299.29	244.85	255.81	250.51	229.43	215.63	200.35	204.09	172.08	206.91	158.42	252.4	225.53	197.39
CiPaw.06G140600.v1.1	1.05	1.3	0.3	61.29	9.46	92.77	437.83	454.71	284.87	1271.75	167.95	402.62	84.23	39.94	82.84	17.48	115.87	256.12	5.36	0	0.82	9.29	3.15	40.09	9.99	4.31	7.79	36.48	45.85	89.11	29.95	55.86	48.82	38.65	61.24	43.4
CiPaw.11G202100.v1.1	15.38	14.07	14.38	170.43	175.36	171.21	253.96	116.8	210.78	145.92	124.62	124.71	57.63	57.76	87.38	74.46	83.42	52.16	24.78	24.55	40.79	223.72	162.68	184.35	85.94	107.64	113.74	94.18	71.98	124.64	48.65	63.66	82.74	75.26	63.01	85.81
CiPaw.11G098300.v1.1	301.51	272.08	289.77	112.89	126.26	113.7	106.21	128.95	124.3	140.49	153.56	136.34	143.89	193.92	158.3	254.12	209.17	228.1	235.16	232.5	246.63	174.92	171.53	150	146.3	151.88	144.66	152.67	190.67	189.51	193.93	209.19	192.38	199.78	228.12	199.15
CiPaw.10G134000.v1.1	94.95	90.86	72.57	32.98	49.95	20.35	39.87	18.38	37.01	28.02	47.7	35.72	90.01	300.59	198.47	348.04	333.12	428.73	89.65	96.43	104.05	62.09	40.23	52.01	67.49	50.68	48.03	83.39	63.95	63.17	472.04	477.72	440.8	626.2	386.95	430.53
CiPaw.02G037900.v1.1	59.8	45.05	49.37	157.27	136.06	169.77	118.96	163.78	146.67	125.1	122.19	130.91	76.49	75.05	83.06	67.96	65.76	58.56	64.45	55.34	56.63	124.51	113.49	126.9	166.43	131.19	124.67	143.81	165.38	168	83.72	38.35	96.78	31.02	68.14	92.26
CiPaw.05G026700.v1.1	194.74	157.71	157.34	116.77	113.96	105.08	207.94	230.98	270.37	282.17	253.06	297.63	218.81	201.1	172.43	276.73	230.57	253.94	157.99	169.36	187.34	119.79	127.95	119.7	201.01	205.8	247.02	242	236.5	233.15	151.18	129.27	182.35	195.22	173.7	193.65
CiPaw.11G209000.v1.1	79.2	60.92	70.33	315.07	219.26	296.72	1386.14	685.52	1361.99	371.72	515.54	563.57	58.82	47.03	36.71	66.59	69.65	50.3	66.43	60.06	64.53	134.55	131.77	126.71	115.3	156.14	197.88	78.55	91.39	128.59	60.03	42.85	47.41	91.03	50.7	63.26
CiPaw.16G010000.v1.1	76.49	98.51	92.03	245.6	240.63	206.49	176.86	177.36	173.06	217.79	237.84	199.6	140.07	112.91	124.52	86.68	102.44	99.91	101.02	93.27	87.89	212.94	212.84	195.56	178.23	160.42	146.63	129.45	131.22	141.05	108.3	110.4	95.71	118.91	133.55	120.09
CiPaw.11G065800.v1.1	239.04	265.38	248.89	407.25	411.2	341.44	203.94	281.59	247.54	341.76	355.07	339.54	285.62	271.69	267.28	293.88	285.16	285.02	196.39	185.97	193.39	353.29	318.47	340.61	240.48	238.86	252.13	274.12	303.13	312.47	249.65	222.63	239.47	266.49	324.27	313.8
CiPaw.01G034500.v1.1	52.45	51.75	49.52	174.98	150.84	162.49	196.01	204.06	198.82	222.54	254.57	253.6	160.09	109.71	121.62	91.76	112.67	99.01	63.58	64.27	69.05	129.22	114.65	101.09	138.97	145.73	164.05	168.84	169.3	166.02	104.57	129.6	117.37	92.27	85.16	96.67
CiPaw.03G096400.v1.1	132.3	146.77	145.51	246.68	240.64	219.84	252.8	265.38	253.08	264.49	273.8	259.56	186.82	171.92	189.81	138.68	166.77	160.65	127.86	124.85	118.88	230.03	255.47	215.29	221.12	211.42	205.57	161.02	179.62	197.37	155.7	147.31	135.25	163.22	177.39	145.31
CiPaw.09G030600.v1.1	140.47	160.22	144.42	157.81	187.53	144.58	49.01	59.94	52.27	61.62	74.72	73.48	115.25	83.99	78.34	60.09	94.06	87.44	170.92	153.78	133.69	137.41	187.82	175.59	102.2	122.68	114.19	84.26	75.28	55.53	125.69	172.31	114.62	162.82	107.63	116.74
CiPaw.03G102600.v1.1	192.18	179.38	185.68	61.79	65.99	54.16	69.83	55.12	69.91	113	114.61	123.17	128.66	159.04	136.54	151.41	150.93	162.97	106.9	97.77	100.35	73.17	82.86	80.05	107.92	111.02	126.82	107.36	93.28	97.09	158.41	193.62	158.16	157.48	104.52	148.56
CiPaw.01G193300.v1.1	133.57	115.41	113.25	5.03	6.18	6.74	12.67	16.58	12.06	21.55	17.36	18.66	53.1	85.67	54.86	50.58	68.04	65.66	155.63	134.73	115.05	19.7	24.55	29.46	61.7	56.33	49.04	51.01	84.48	70.15	114.18	60.28	103.96	101.08	73.54	66.44
CiPaw.05G030300.v1.1	32.17	8.13	14.02	7.36	8.27	1.15	0	0	0.36	4.83	3.04	1.53	45.8	75.74	49.13	216.01	394.15	241.17	17.38	2.68	7.88	20.68	20.62	111.65	131.67	25.44	71.35	81.19	133.53	115.14	281.84	132.13	226.15	552.4	324.14	375.64
CiPaw.02G174300.v1.1	85.3	82.54	82.71	254.48	227.88	261.57	154.91	184.17	164.11	202.51	186.87	179.48	111.6	116.05	117.12	104.89	120.36	113.13	108.95	92.37	99.15	263.12	251.77	279.42	175.36	145.49	174.02	148.47	157.72	173.79	137.24	189	136.85	170.4	161.94	147.77
CiPaw.06G028700.v1.1	123.16	84.46	108.34	18.51	20.79	10.88	43.5	71.89	49	82.47	47.77	57.69	113.67	156.99	133.99	135	54.73	110.01	7.43	8.41	11.07	18.46	44.48	23.09	107.59	188.97	130.42	132.97	87.6	88.83	74.02	67.91	77.71	36.96	53.8	68.97
CiPaw.04G109200.v1.1	159.57	138.32	146.39	46.12	47.25	46.02	52.3	48.41	39.71	68.48	53.85	63.47	135.76	116.74	149.41	116.7	78.88	75.38	78.86	67.12	68.91	77.84	69.69	77.84	85.06	111.54	149.46	189.23	127.97	90.59	169.91	176.78	181.74	166.93	121.74	129.13
CiPaw.09G189200.v1.1	163.35	190.96	183.24	90.53	74.93	85.04	74.51	64.55	69.34	79.37	79.74	78.76	119.7	162.6	140.55	128.6	173.09	125.18	203.48	193.33	180.65	119.73	119.35	100.81	110.65	117.12	105.98	87.19	103.38	100.32	177.55	167.48	144.63	158.89	155.38	149.69
CiPaw.06G057000.v1.1	182.95	177.33	196.78	316.93	358.09	290.57	287.53	249.25	240.1	208.81	218.21	226.52	185.87	252.44	229.75	176.96	193.86	215.57	235.88	240.31	230.65	367.84	369.73	353.78	351.62	322.07	327.2	268.98	238.32	258.09	227.78	239.84	216.48	341.11	310.23	243.37
CiPaw.06G140400.v1.1	0.76	3.23	0.24	145.86	21.61	153.86	1466.91	1267.07	680.51	2935.99	123.04	626.71	77.73	44.06	57.17	24.7	54.64	157.91	5.01	0.47	3.07	7.67	2.11	9.75	44.51	30.64	9.94	41.31	43.33	489.46	11.1	50.76	207.36	26.43	32.3	45.32
CiPaw.05G249500.v1.1	97.72	102.52	114	80.4	76.89	75.86	231.35	115.17	181.52	67.1	86.41	80.19	23.88	14.86	16.42	30.35	15.23	23.12	115.54	99.94	106.19	78.83	84.25	89.34	77.74	92.85	77.59	32.09	44.45	36.54	13.11	9.41	14.16	4.95	9.05	6.02
CiPaw.11G041400.v1.1	1.49	1.81	0.92	682.52	198.28	841.33	885.84	1357.1	731.82	1144.83	857.13	724.59	462.11	87.34	299.86	52.51	62	64.24	1.04	0.59	2.71	12.76	16.97	20.97	59.88	35.45	41.48	52.47	24.44	69.41	34.8	18.77	25.15	23.13	40.93	39.8
CiPaw.04G113900.v1.1	9	6.96	10.09	171.08	191.2	141.25	96.9	61.19	87.09	57.71	59.32	76.2	44.82	51.93	50.24	36.19	19.77	18.39	3.36	2.44	2.59	158	160.12	139.82	59.45	130.12	76.05	83.57	91.1	118.01	21.1	19.2	19.33	6.45	16.67	3.96
CiPaw.10G049400.v1.1	44.46	53.17	48.23	58.42	20.9	83.88	804.57	606.2	545.42	329.93	480.42	412.1	82.3	150.21	104.38	53.12	56.59	69.3	1.73	1.04	1.8	20.61	5.52	5.94	93.51	67.69	52.94	120.24	81.13	109.31	71.79	67	70.94	55.48	15.66	30.01
CiPaw.01G136000.v1.1	45.73	39.94	35.33	42.49	45.71	27.63	95.05	68.33	102.77	87.32	120.85	129.12	91.3	118.79	80.35	144.09	168.78	107.78	271.81	334.7	397.54	129.02	129.33	101.99	158.64	246.63	184.36	184.07	256.76	150.06	146.12	84.27	151.95	92.94	112.2	191.77
CiPaw.01G202900.v1.1	203.52	216.8	237.94	84.11	96.19	86.22	79.67	71.92	83.04	88.32	83.52	92.65	98.49	140.02	118.3	172.35	184.38	183.11	257.7	258.96	249.38	166.79	162.16	162.87	150.5	187.05	173.47	174.86	193.13	194.37	214.31	203.45	176.76	265.78	199.31	205.91
CiPaw.12G090200.v1.1	119.49	123.03	137.56	57.73	81.18	88.23	94.14	79.47	73.73	81.15	88.04	65.75	78.71	97.6	73.95	121.39	83.9	88.93	9.45	5.18	6.97	4.13	4.56	4.52	0.5	2.38	3.17	4.3	6.93	5.77	16.37	16.28	8.49	24.98	14.32	16.63
CiPaw.15G003900.v1.1	112.54	95.84	109.32	161.6	94.26	157.67	413.12	285.79	434.66	178.92	258.28	238.42	73.53	46.77	68.25	106.67	125.39	96.27	12.78	21.73	27.79	163.81	130.53	118.09	155.93	182.09	211.72	101.88	103.49	101.33	81.28	84.26	70.13	93.37	59.68	105.78
CiPaw.07G041400.v1.1	187.38	241.33	218.46	60.05	97.14	63.23	70	64.4	62.37	51.44	59.4	73	160.35	248.4	140.12	136.55	98.82	132.87	130.62	135.5	161.32	109.53	106.52	89.49	104.93	171.35	117.04	184.81	173.31	143.78	150.87	161.38	162.84	104.64	115.07	108.43
CiPaw.16G065100.v1.1	204.23	210.46	191.92	45.43	64.72	40.79	91.23	100.73	103.58	92.96	91.5	105.76	114.11	172.73	132.8	204.95	135.98	145.61	315.62	328.03	268.02	158.49	158.84	157.46	152.18	125.78	137.76	139.31	177.41	205.36	143.99	91.52	152.86	85.59	126.72	159.09
CiPaw.10G041600.v1.1	5.45	8.08	8.27	230.39	143.69	203.35	277.13	190.49	337.01	212.85	253.6	304.04	61.91	43.96	36.42	21.01	29.86	31.34	11.28	10.31	10.58	75.7	48.15	57.27	62.21	78.64	105.82	93.02	85.24	110.85	20.67	50.03	33.84	19.12	22.7	19.83
CiPaw.01G046000.v1.1	16.91	4.36	8.37	7.39	7.19	0.95	0.6	0	0	1.24	2.53	0.64	56.98	89.58	51.88	162.84	275.76	202.73	11.69	4.77	6.58	22.57	16.45	56.19	103.44	23.57	69.85	80.25	131.38	99.23	191.58	100.67	166.21	447.56	265.6	387.63
CiPaw.10G164000.v1.1	169.07	153.35	171.13	361.18	431.45	492.9	319.98	339.98	280.19	262.41	288.44	256.75	221.94	193.54	209.71	228.31	174.64	188.05	146.07	147.49	151.66	187.59	197.89	213.47	164.09	121.72	143.67	127.45	137.82	165.13	147.2	135.94	150.72	100.54	131.19	120.48
CiPaw.02G094800.v1.1	82.6	97.03	81.06	255.1	224.83	242.41	203.53	198.28	198.18	222.99	230.63	211.75	180.49	132.13	149.65	112.53	126.06	116.28	103.89	110.05	112.58	261.64	285.16	229.52	174.76	165.38	176.78	145.76	145.61	155.11	120.16	126.78	122.37	145.99	149.21	133.63
CiPaw.07G174300.v1.1	342.73	368.24	335.75	1.62	2.87	1.43	5.25	6.81	6.22	4.52	6.88	8.01	28.77	48.25	29.04	81.69	65.84	77.1	512.48	499.03	465.36	55.4	47.2	49.91	21.23	29	27.3	36.54	51.16	28.2	71.83	47.29	97.92	115.18	63.42	158.18
CiPaw.11G192200.v1.1	361.5	348.41	355.89	495.91	518.67	555.44	312.51	339.55	320.39	305.14	289.11	291.88	270.27	282.22	275.87	317.77	260.52	283.16	371.54	364.4	353.56	431.97	395.39	427.42	333.33	318.61	296.81	321.73	330.13	403.55	262.8	256.1	315.48	202.44	287.09	279.7
CiPaw.01G031100.v1.1	157.4	145.16	146.33	44.83	47.56	40.91	51.19	60.42	64.06	72.54	62.11	69.27	105.21	118.07	102.18	174.69	197.64	191.49	128.78	143.81	170.66	73.46	81.14	70.18	64.21	68.06	80.08	94.27	108.78	91.33	121.83	155.65	141.72	137.95	131	133.62
CiPaw.03G187200.v1.1	106.45	169.66	139.74	11.51	16.46	8.38	12.41	13.35	8.82	23.25	13.12	18.8	55.65	101.69	75.71	53.21	99.98	65.85	70.99	79.63	112.2	16.31	14.15	17.36	34.05	45.53	33.49	46.85	47.86	22.78	125.52	204.47	97.18	120.75	124.1	208.36
CiPaw.09G142800.v1.1	244.28	249.08	260.15	40.79	41.38	40.01	30.09	49.03	34.96	71.11	67.86	69.04	116.81	128.48	164.64	181.7	139.14	128.77	86.14	89.74	94.72	79.28	51.84	39.14	82.63	120.27	111.73	130.27	98.72	74.96	165.59	173.9	154.3	138.51	135.24	180.15
CiPaw.01G171800.v1.1	0.83	1.89	0.61	2443.8	959.7	3235.07	569.52	749.58	338.29	1258.44	1489.68	1415.49	766.14	74.42	135.63	26.55	21.7	31.68	12.43	0.89	2.15	103.29	91.82	184.55	74.89	40.58	73.06	35	8.39	24.75	3.82	21.8	4.8	1.92	9.59	2.38
CiPaw.05G211400.v1.1	4.77	5.42	3.89	367.63	359.59	434.52	92.08	112.8	99.32	145.76	70.47	42.78	49.22	43.97	71.78	86.05	61.01	65.22	5.19	10.24	25.3	449.79	496.57	480.41	120.12	82.6	98.1	115.1	45.06	147.73	32.92	209.78	58.13	62.51	96.81	56.81
CiPaw.06G134000.v1.1	251.94	263.05	269.62	434.19	375.31	380.07	280.16	343.5	312.54	381.63	402.11	331.48	278.64	234.64	261.08	204.29	251.38	287.12	236.13	225.42	225.29	348.14	377.64	334.14	224.25	268.54	245.54	257.91	201.64	243.03	195.65	227.57	189.76	286.78	237.84	194.82
CiPaw.02G004500.v1.1	399.73	370.86	382.6	475.27	547.12	471.89	358.65	387.82	374.5	339.54	345.77	344.9	352.4	392.62	407.8	373.49	401.67	323.6	443.83	419.4	433.39	413.93	510.82	457.91	363.9	362.66	342.31	320.74	337.23	341.75	381.36	429.83	346.81	455.13	425.54	371.31
CiPaw.05G043200.v1.1	52.22	25.13	27.48	58.86	69.52	46.13	96.96	66.32	85.52	56.96	65.27	53.11	40.25	81.42	47.32	46.73	56.45	54.96	37.43	35.35	30.34	295.17	191.78	341.01	125.71	211.81	171.09	110.57	84.74	180.67	222	357.45	200.03	283.73	158.74	139.27
CiPaw.07G015000.v1.1	325.44	275.81	313.98	26.54	24.16	25.2	47.68	74.08	56.2	117.3	131.41	121.76	155.3	119.8	168.58	220.45	126.12	127.54	31.37	38.37	44.86	44.17	53.32	32.64	135.29	154	163.06	152.71	141.5	111.45	125.66	161.7	146.83	125.9	146.56	119.63
CiPaw.01G175200.v1.1	296.65	289.36	217.27	268.3	272.73	252.39	151.84	187.82	149.51	187.97	165.55	160.65	234.38	266.49	189.62	277.26	218.75	238.03	295.19	345.33	252.93	314.59	277.48	320.11	216.01	214.89	297.9	252.03	202.84	206.39	175.48	250.89	217.97	384.16	259.01	209.38
CiPaw.14G044300.v1.1	180.27	163.04	171.02	118.68	159.45	136.16	202.52	244.46	224.11	290.81	307.69	318.5	186.89	203.96	189.82	335.89	170.16	202.6	230.28	226.07	234.31	192.5	178.34	163	238.76	248.96	257	226.58	254.23	321.48	164.53	131.93	168.37	162.28	165.63	212.35
CiPaw.01G290700.v1.1	50.53	37.8	50.7	36.11	35.1	37.74	99.44	168.45	138.29	160.53	135.61	154.79	108.52	69.03	108.18	79.92	74.68	81.62	14.26	13.01	14.96	26.65	37.74	48.15	127.58	132.58	139.34	141.4	157.8	143.58	72.18	30.88	70.97	37.5	50.78	71.34
CiPaw.13G039800.v1.1	194.35	245.18	225.95	418.64	435.86	367.46	342.2	316.39	353.23	280.03	293.98	304.67	268.17	273.95	277.11	219.79	276.75	243.33	269.61	245.91	232.73	390.09	401.04	364.95	318.33	326.21	312.11	251.42	266.57	273.39	265.72	304.49	227.67	370.07	344.02	279.27
CiPaw.15G113400.v1.1	156.26	140.43	143.93	14.34	17.74	15.48	27.28	28.7	28.3	32.61	32.25	34.43	65.27	123.98	78.77	140.9	98.49	123.92	212.16	219.38	225.07	44.03	46.42	41.57	66.69	89.25	76.45	67.32	72.54	77.76	98.88	64	96.1	78.16	68.9	91.01
CiPaw.06G124900.v1.1	95.51	98.35	89.28	103.05	139.13	113.03	173.21	119.52	161.34	163.73	167.46	177.85	170.72	181.06	197.22	167	186.17	201.33	165.01	172.47	166.23	143.4	115.8	131.12	130.41	136.21	126.49	310.9	261.18	282.73	232.66	268.55	207.98	295.49	262.07	208.34
CiPaw.03G123500.v1.1	241.45	224.36	269.13	39.33	42.9	39.01	31.28	55.67	43.61	84.01	61.2	63.44	98.94	123.55	102.89	213.78	140.23	168.83	217.67	207.44	211.16	115.79	92.61	99.5	73.66	105.98	109.95	107.76	136.36	102.44	85.64	61.09	86.92	84.68	64.03	99.26
CiPaw.03G041000.v1.1	120	123.18	110.08	319.56	318.91	286.48	225.97	217.22	224.13	203.07	225.82	210.48	185.7	176.03	181.68	164.58	190.22	148.32	133.41	129.82	134.68	271.72	266.34	249.19	201.9	196.2	201.86	158.52	155.18	170.86	151.02	169.86	151.25	226.14	207.04	163.42
CiPaw.11G179000.v1.1	243.45	224.68	194.87	271.94	280.5	300.02	303.85	301.1	293.01	323.15	309.68	327.2	362.5	346.45	329.95	395.81	370.99	365.86	262.62	325.16	332.62	252.2	234.49	229.81	265.27	248.2	250.73	340.31	262.99	275.63	288.22	328.4	326.4	401.31	284.17	340.58
CiPaw.10G121400.v1.1	768.72	829.08	799.7	745.24	811.43	740.94	675.43	707.2	712.95	715.19	736.93	726.87	818.25	758.97	779.67	789.06	776.47	708.18	1005.9	1009.87	973.16	853.76	928.98	887.01	748.47	796.04	751.7	720.3	777.9	736.14	778.32	745.54	758.28	773.65	715.91	707.52
CiPaw.05G100700.v1.1	199.14	181.52	190.03	169.43	159.19	162.73	139.75	154.02	146.62	162.3	167.68	166.96	140.79	201.65	158.67	208.12	211.52	209.48	249.03	231.92	234.4	223.12	261.08	227.37	228.13	224.84	228.04	216.25	225.95	277.09	258.47	287.55	243.57	267.7	279.77	251.42
CiPaw.04G122600.v1.1	123.31	93.56	116.13	97.72	125.54	93.32	222.43	269.17	289.26	150.02	188.8	194.77	69.35	50.21	58.83	161.29	184.56	203.54	159.58	143.62	124.67	130.48	160.32	132.58	197.92	197.28	190.66	159.8	175.09	159.61	73.9	66.25	82.53	154.04	124.27	175.04
CiPaw.14G103400.v1.1	82.84	60.62	60.49	94.07	108.13	104.78	48.42	60.64	54.61	95.71	50.76	43.14	51.45	75.46	63.8	86.49	127.26	126.44	36.96	37.58	45.53	347.23	264.86	315.4	105.9	91.06	88.78	135.69	89.3	133.86	133.41	330.64	118.49	312.88	200.51	169.98
CiPaw.06G081800.v1.1	382.78	376.2	356.84	248.07	261.01	275.53	301.71	268.39	284.07	342.55	343.51	353.29	293.75	381.37	334.32	339.22	359.34	337.92	417.48	393.9	387.1	360.32	365.34	334.68	380.37	415.67	410.94	401.83	419.97	426.23	412.15	413.79	408.89	511.62	391.43	416.11
CiPaw.02G195600.v1.1	144.07	123.25	183.37	11.55	9.87	12.83	9.26	12.68	14.65	53.54	85.37	81.66	89.74	67.79	86.92	116.49	98.18	126.6	252.99	237.83	258.02	94.26	79.68	73.21	68.17	46.43	59.44	132.71	112.12	138.9	68.82	74.32	119.01	45.27	113.63	46.49
CiPaw.07G024700.v1.1	60	73.06	62.1	369.55	327.33	343.31	173.82	234.99	181.66	140.23	212.92	175.09	145.66	128.06	141.25	129.95	176.52	140.52	122.11	63.69	138.87	174.96	251.5	250.79	188.81	170.98	120.24	75.82	106.48	79.01	122.83	117.35	114.49	89.11	116.12	96.49
CiPaw.03G273300.v1.1	98.48	83.63	86.58	112.93	119.28	111.98	117.24	190.35	186.72	140.49	158.81	155	130.13	111.59	141.55	120.43	104.39	83.98	86.48	84	78.5	149.37	138.95	164.68	285.86	285.52	253.29	280.42	314.11	298.65	167.06	69.03	210.25	76.71	122.97	170.9
CiPaw.09G159600.v1.1	71.9	63.94	61.29	22.93	33.09	30.37	8.14	12.16	14.77	31.23	30.15	28.09	39.71	84.22	51.21	421.14	314.18	302.77	299.67	373.65	530.56	497.95	288.23	182.8	40.85	81.4	43.06	39.66	43.96	41.48	92.88	176.18	70.06	89.47	92.73	119.72
CiPaw.13G085400.v1.1	66.67	61	71.77	204.53	130.31	138.61	804.95	294.72	534.38	133.34	113.95	117.92	109.33	79.54	68.71	82.42	68.81	97.86	258.49	469.19	381.82	151.94	158.78	102.78	93.46	124.82	24.07	40.52	24.4	44.62	78.49	92.14	92.36	20.86	22.31	26.18
CiPaw.16G018000.v1.1	3.33	4.64	2.52	134.21	108.45	112.7	175.76	137.78	167.29	137.23	152.61	189.46	36.47	23.18	18.18	28.7	51.39	36.52	1.73	3.29	3.61	85.39	56.35	51.78	76.97	44.07	25.6	113.82	43.78	122.56	11.3	27.81	24.22	23.41	32.84	66.34
CiPaw.13G127600.v1.1	48.88	87.51	72.45	77.21	104.35	99.17	41.07	39.26	16.24	33.8	17.89	47.83	144.74	133.2	150.64	118.43	200.41	60.84	2.34	4.09	4.94	10.85	6.12	27.09	43.06	101.96	64.3	82.15	35.63	42.94	166.39	165.35	120.17	70.11	48.81	80.4
CiPaw.09G210300.v1.1	109.33	132.19	121.47	11.02	17.07	10.36	5.85	11.42	6.34	16.14	8.94	17.43	116.66	281.15	173.14	113.78	241.78	155.52	43.67	47.39	57.14	26.18	21.95	28.26	35.81	51.52	32.24	43.27	29.15	29.31	241.59	264.35	214.57	175.93	153.45	200.47
CiPaw.08G003500.v1.1	87.82	107.38	110.51	0.81	0.54	0.34	2.3	10.43	3.4	47.08	34.07	51.33	127.39	60.92	117.6	82	51.22	49.18	2.18	1.72	2.52	9.83	9.54	4.48	46.32	67.04	69.74	80.62	56.01	37.58	81.26	116.61	76.19	62.16	32.41	49.05
CiPaw.09G112200.v1.1	11.7	11.78	7.84	71.38	67.14	62.93	444.79	243.85	485.24	221.32	296.23	299.7	21.82	7.15	7.22	27.58	57.52	40.62	17.74	20.95	31.22	57.99	54.11	52.71	89.29	112.26	135.44	66.77	61.77	59.62	8.66	17.1	10.66	28.78	15.03	24.54
CiPaw.01G148900.v1.1	91.6	91.89	90.09	182.32	227.32	214.8	165.58	137.86	143.95	77.13	106.1	93.09	128.67	176.99	146.46	106.12	92.71	81.31	173.92	177.29	152.27	233.6	260.43	227.9	168.41	154.09	127.5	113.7	153.91	123.28	134.67	128.27	120.55	76.08	125.14	96.99
CiPaw.05G137500.v1.1	45.64	49.42	45.36	331.87	317.02	341.85	192.2	247.16	219.99	233.44	240.46	240.58	253.09	155.82	227.42	127.55	128.93	142.78	40.27	36.11	41.05	148.56	165.89	152.15	118.01	108.02	114.42	130.85	95.08	129.57	118.06	165.91	122.66	114.84	95.89	95.58
CiPaw.04G182400.v1.1	193.01	160.38	169.29	182.64	141.28	160.44	195.7	314.82	326.3	302.19	290.17	336.61	185.79	161.86	177.3	164.2	184.49	195.87	167.39	159.86	194.85	247.42	198.05	211.4	419.77	342.41	358.05	489.93	656.34	607.66	211.59	102.73	288.4	117.14	195.42	273.06
CiPaw.04G141100.v1.1	64.49	51.44	62.25	104.2	83.81	97.4	337.06	209.37	405.97	208.03	273.96	299.93	43.68	68.02	30.75	124.62	139.2	106.54	227.81	213.48	211.64	101.5	108.69	86.56	122.29	138.76	122.04	90.27	160.09	108.92	76.49	38.06	72.03	89.89	63.05	91.04
CiPaw.04G067500.v1.1	109.59	107.66	104.73	6.08	6.15	4.45	7.85	6.58	7.22	16.15	14.62	19.83	35.55	71.66	47.06	48.01	66.61	65	115.95	98.5	88.5	63.3	69.18	56.87	87.54	87.21	109.16	86.5	109.24	74.06	154.17	91.11	149.95	153.62	102.95	152.18
CiPaw.04G167100.v1.1	55.28	54.58	70.85	102.93	101.46	116.03	170.34	163.15	82.97	128.29	144.25	127.27	366.45	234.82	206.92	168.52	118.15	104.34	10.66	25.83	3.44	54.94	37.02	55.07	62.71	91.11	71.48	123.53	25.92	42.29	120.5	140.51	84.86	56.56	39.69	52.51
CiPaw.04G170000.v1.1	0	0	1.08	85.3	79.43	41.9	168.29	63.11	93.72	154.45	249.64	199.68	13.72	15.93	14.88	3.25	27.59	41.01	0.32	0.33	0.32	37.86	31.88	70.01	74.82	70.56	84.16	190.78	64.79	149.43	45.32	78.8	34.52	51.45	18.32	0.35
CiPaw.01G184800.v1.1	236.36	232.01	212.45	383.56	382.31	322.21	268.41	226.42	244.06	213.13	237.71	226.57	199.68	276.23	215.23	188.38	231.04	222.02	234.21	225.62	231.92	316.06	333.93	301.63	339.33	303.25	274.39	264.88	288.74	297.58	286.01	275.93	261.49	262.08	329.63	290.16
CiPaw.11G040100.v1.1	2.86	2.24	4.7	11.18	8.22	9.69	29.8	56.37	49.54	37.45	27.71	39.71	42.26	60.87	70.64	85.66	177.44	132.25	7.2	2.9	5.75	15.62	4.97	12.04	72.87	112.35	88.29	189.07	101.72	125.64	144.36	44.08	43.88	79.17	114.72	56.4
CiPaw.08G161400.v1.1	62.17	83.65	72.77	228.41	238.53	216.97	206.2	189.68	190.24	150.29	176.07	157.54	137.59	144.97	140.24	112	114.59	107.05	105.43	102.35	89.09	232.9	242.98	192.04	177	152.34	137.78	100.92	119.93	136.61	95.85	114.7	103.57	115.7	122.11	91.89
CiPaw.05G028600.v1.1	264.54	236.42	193.57	500.43	487.28	485.37	384.65	352.72	334.12	235.41	224.74	228.22	278.16	291.21	294.06	253.77	275.95	258.48	278.52	282.48	282.71	391.96	399.89	420.51	359.75	299.32	241.85	264.18	289.9	266.26	265.94	250.54	274.78	321.45	338.58	300.44
CiPaw.03G206000.v1.1	558.06	475.56	488.32	694.7	779.19	805.13	631.5	715.67	619.44	529.38	546.35	517.68	538.98	505.63	522.25	578.72	510.75	514.25	518.83	506.99	523.76	501.84	490.99	599.63	500.73	493.07	482.87	408.3	420.58	477.82	356.71	372.49	395.27	328.4	401.71	393.82
CiPaw.01G006600.v1.1	175.11	138.57	158.6	188.88	166.49	207.17	188.37	209.66	218.77	235.59	233.36	232.48	205.58	285.86	220.25	289.93	294.07	272.99	104.67	96.21	128.63	198.87	194.09	138.37	184.96	193.04	180.39	232.68	170.56	270.11	152.54	129.17	127.57	164.38	180.36	231.77
CiPaw.10G148000.v1.1	1.37	1.75	1.81	500.34	373.64	500.82	766.05	598.62	816.38	336.58	395.61	387.36	42.4	40.87	46.65	86.82	75.24	56.94	1.11	2.78	2.74	113.74	76.12	90.93	70.93	74.51	146	61.04	39.2	61.83	50.19	100.73	35.34	74.33	40.35	68.46
CiPaw.07G174000.v1.1	312.22	294.9	285.46	287.96	323.32	305.71	266.26	327.78	312.27	277.34	265.6	267.5	328.02	302.93	330.33	257.56	358.02	324.3	547.56	494.59	474.1	397.81	437.09	511.84	456.05	479.19	461.27	364.99	356.07	328.85	362.59	360.02	383.26	325.11	338.42	323.1
CiPaw.11G108600.v1.1	148.87	143.36	172.91	145.97	217.85	129.33	74.89	60.95	83.12	53.43	50.96	67.46	78.69	86.64	61.32	151.54	71.94	142.86	319.06	361.44	370.64	224.52	178.15	122.37	25.79	43.01	42.05	34.08	53.68	31.52	70.7	21.01	64.2	53.51	62.9	49.84
CiPaw.14G017300.v1.1	4.34	3.17	5.37	149.9	151.44	192.6	278.64	239.08	264.58	248.9	235.21	202.2	62.31	13.37	84.03	49.01	40.84	42.24	8.48	8.5	9.2	63.35	62.14	105.18	42.25	35.19	54.17	30.55	37.35	29.59	31.58	23.78	38.71	124.76	79.73	58.9
CiPaw.14G097000.v1.1	39.12	39.98	32.03	2.96	2.33	0.96	0.89	1.75	1.86	2.63	1.06	1.35	14.41	101.68	41.87	302.87	286.92	190.95	113.79	96.9	121.86	44.44	5.89	13.41	18.65	35.73	18.37	32.67	32.52	48.4	134.7	99.24	65.09	132.68	228.45	232.52
CiPaw.08G052900.v1.1	148.83	187.48	182.18	10.92	11.54	8.54	7.54	15.44	9.35	24.89	22.42	27.32	94.8	65.43	76.96	64.5	48.09	69.49	15.94	16.71	18.47	13.61	15.8	12.16	56.25	58.25	72.06	91.77	75.46	47.94	78.43	84.57	98.39	51.61	58.4	89.12
CiPaw.07G057600.v1.1	90.9	100.43	80.92	254.02	238.68	219.67	176.24	189.73	177.12	200.88	205.57	193.98	160.55	121.65	133.25	108.6	133.09	114.98	101.27	98.59	101.44	212.86	213.25	177.9	145.75	145.91	146.68	126.72	125.82	122.7	100.41	109.61	107.39	144.04	140.07	129.23
CiPaw.09G079000.v1.1	182.69	182.06	184.14	77.4	105.42	85.94	99.92	104.27	108.12	96.77	84.24	89.89	89.3	115.63	111.17	124.74	116.93	129.74	203.38	202.69	182.94	162.96	141.92	152.7	162.99	192.7	182.44	162.44	177	166.02	158.44	127.11	170.16	170.79	147.88	136.94
CiPaw.01G087200.v1.1	114.33	195.57	128.42	211.02	238.22	135.47	125.06	134.35	107.01	74.52	93.43	52.26	33.47	26.04	33.89	8.49	51.92	46.66	109.68	99.47	65.99	81.86	126.24	122.32	115.06	101.46	90.6	63.85	63.49	43.86	32.07	35.28	31.4	49.91	56.84	52.92
CiPaw.01G055500.v1.1	94.94	123.25	126.5	5.86	5.01	9.62	18.69	24.3	11.52	36.56	49.61	51.23	129.36	75.79	173.62	116.64	82.06	81.38	1.53	2.24	1.08	6.28	9.31	6.39	23.12	28.93	28.3	58.74	36.37	27.89	75.02	157.97	94.41	50.11	55.49	100.65
CiPaw.05G246200.v1.1	129.74	126.89	137.61	220.91	232.79	227.18	220.3	228.81	226.52	232.28	227.78	250.5	199.34	167.9	195.39	146.78	134.36	134.02	150.2	155.04	150.49	180.25	187.56	195.53	182.9	231.65	210.26	186.2	167.49	155.23	153.11	156.07	162.15	139.8	112.92	135.29
CiPaw.03G067000.v1.1	106.95	200.19	178.51	69.92	88.64	85.61	91.87	124.26	74.72	103.37	57.6	97.09	346.01	106.74	269.79	50.76	61.07	41.5	23.83	21.78	21.52	28.48	36.71	26.22	90.01	146.17	157.74	179.95	87.36	84.48	226.91	201.87	124.76	121.09	81.23	78.12
CiPaw.03G058500.v1.1	106.06	125.57	108.48	327.11	316.61	297.71	214.31	231.73	214.68	202.36	219.22	199.29	174.68	166.99	177.73	129.76	159.87	135.89	128.96	120.94	118.66	274.83	295.14	266.07	203.58	178.01	174.06	142.5	164.33	162.07	155.85	165.26	151.96	157.06	204.22	191.26
CiPaw.07G047700.v1.1	144.41	151.37	145.33	33.83	39.76	30.77	41.63	38.12	46.86	47.52	48.58	61.04	75.54	124.87	95.87	126.59	126.21	123.34	164.71	155.39	144	57.93	53.18	59.64	95.42	102.48	75.24	104.78	131.51	115.4	126.09	86.51	121.85	116	119.3	133.53
CiPaw.09G186600.v1.1	113.18	127.16	132.39	34.38	43.15	36.01	48.04	62.8	60.95	85.53	75.03	89.75	187.17	136.29	178.76	128.13	121.79	114.69	21.69	26.77	34.03	40.11	48.14	39.03	56.38	69.76	81.68	80.54	69.55	57.98	129.38	99.99	132.37	92.42	84.47	117.79
CiPaw.07G226600.v1.1	80.48	99.25	90.64	254.84	246.92	222.09	183.71	200.53	192.91	184.47	179.52	190.81	163.83	149.84	155.94	107.69	132.13	116.17	106.2	100.32	97.3	235.65	252.27	238.67	181.76	168.49	148.74	112.76	129.97	137.18	120.89	142.95	115.61	139.91	149.19	136.22
CiPaw.07G168400.v1.1	203.31	214.37	245.83	110.52	118.12	140.61	183.3	268.73	210.62	216.63	258.28	248.33	225.19	148.8	156.95	116.66	123.77	122.55	57.53	61.78	56.6	68.53	80.72	80.36	162.06	180.75	208.13	148.69	124.18	128.8	150.43	127.5	137.98	118.45	113.55	139.76
CiPaw.03G187800.v1.1	209.67	223.8	230.46	162.86	185.99	155.96	128.68	138.11	133.5	143.95	138.51	142.7	155.15	198.46	173.35	228.1	222.57	220.62	314	301.42	270.63	274.74	260.89	254.23	217.93	214.31	199.79	209.04	208.82	227.9	229.74	245.5	227.17	254.55	275.7	264.66
CiPaw.09G161900.v1.1	75.97	79.34	66.76	7.99	13.73	3.51	10.49	9.45	13.61	8.4	13.26	11.66	18.56	76.39	39.91	22.28	67.76	63.15	78.82	68.23	72.35	224.66	134.18	180.13	103.73	91.21	79.32	84.41	97.08	110.1	105.5	83.38	78.3	171.77	213.96	133.56
CiPaw.13G098600.v1.1	420.43	436.87	381.06	167.65	179.91	138.71	118.8	132.49	146	158.78	189.14	164.36	152.18	191.84	183.69	212.97	244.76	216.76	425.69	409.56	371.67	207.04	211.49	199.65	211.57	196.61	224.84	229.5	217.24	188.35	235.4	174.62	224.95	381.47	347.09	298.19
CiPaw.09G210400.v1.1	76.74	120.66	111.83	24.99	30.89	29.32	8.28	14.46	9.14	33.22	23.47	25.71	181.69	294.31	244.96	384.72	392.55	262.98	49.79	58.12	94.71	48.41	31.68	35.65	32.71	41.24	35.08	73.45	49.04	35.96	245.01	431.29	255.78	212.12	214.62	344.08
CiPaw.07G122500.v1.1	222.84	242.79	246.05	26.51	22.72	22.77	94.4	80.65	76	94.28	98.71	127.71	260.09	116	207.27	107.27	97.28	85.11	23.57	30.14	35.59	38.58	33.29	29.51	112.34	109.91	147.97	122.25	90.1	75.35	150.57	194.34	133.93	110.88	69.42	90.32
CiPaw.13G084700.v1.1	16.89	15.02	15.66	211.13	138.21	128.11	620.88	192.57	412.1	92.02	67.7	113.33	187.72	78.05	97.17	35.05	82.17	82.23	136.8	158.5	150.24	99.61	90.16	112.42	88.05	125.26	85.83	89.41	58.51	55.33	84.42	109.12	78.14	12.27	27.09	20.54
CiPaw.07G012800.v1.1	56.06	61.51	51.24	33.68	51.29	49.36	119.27	151.03	139	114.37	101.62	129.89	61.69	80.43	88.37	43.16	79.67	59.44	60.49	40.6	35.57	44.03	44.39	63.31	174.52	96.79	112.38	127.92	141.03	166.64	198.77	168.18	185.58	75.9	166.86	93.21
CiPaw.01G157500.v1.1	376.79	337.51	334.38	277.35	309.19	292.69	252.2	292.29	261.06	258.76	244.19	253.72	251.97	316.14	252.24	349.38	340.45	329.58	404.96	445.2	449.64	319.33	295.75	303.72	266.86	271.45	279.29	303.03	291.9	297.51	341.17	357.23	329.38	485.77	365.52	414.33
CiPaw.02G064900.v1.1	12.5	11.03	14.03	147.23	120.64	144.67	300.91	178.57	348.43	226.48	233.62	297.34	20.95	11.01	14.36	20.6	38.54	27.29	8.23	5.55	9.14	74.38	75.54	80.05	62.2	57.69	72.89	70.08	99.14	62.54	11.83	17.15	9.68	28.72	19.8	16.31
CiPaw.07G016200.v1.1	56.09	55.15	72.81	109.99	58.96	141.77	117.37	179.02	146.87	145.53	158.93	141.47	84.39	51.97	66.63	91.84	81.91	91.4	29.18	34.71	39.61	99.46	102.23	103.1	94	98.66	147.1	100.8	99.17	136.17	57.46	27.16	60.99	27.09	41.6	43.77
CiPaw.08G111200.v1.1	55.27	47.92	54.22	161.92	148.75	161.61	49	62.77	59.72	82.34	64.86	59.99	65.52	96.4	83.59	123.08	146.05	115.65	66.2	59.97	79.11	242.46	313.32	281.6	139.65	116.77	113.49	111.48	115.32	132.41	104.5	191.01	114.66	134.89	145.08	127.85
CiPaw.07G065300.v1.1	2.43	1.31	2.27	124.45	72.98	109.33	167.42	150.6	150.43	172.26	105.94	106.98	106.25	42.99	82.31	43.76	48.89	71.76	4.87	0.13	0.38	85.27	41.76	84.37	108.85	107.89	118.79	110.27	89.54	184.07	65.52	64.68	109.52	48.18	78.69	37.77
CiPaw.13G104700.v1.1	37.92	33.67	37.92	33.3	39.96	31.41	27.31	26.43	31.73	42.55	53.69	41.88	44.34	77.51	54.97	82.35	111.42	68.91	78.51	85.61	77.39	188.99	137.89	138.19	104.98	122.25	125.29	108.37	74.92	85.54	110.89	106.49	77.7	142.34	112.09	113.73
CiPaw.02G142900.v1.1	222.39	206.46	233.62	431.68	436.42	395.07	348.84	345.52	333.42	309.98	331.71	305.13	306.9	275.01	279.94	245.4	229.78	237.84	236.62	235.97	216.16	426.13	460.05	386.93	281.41	232.23	232.04	205.61	239.78	232.69	209.27	227.39	217	173.57	231.19	192.76
CiPaw.15G179300.v1.1	112.5	109.37	113.63	46.42	53.25	49.51	47.78	60.19	48.65	68.37	81.42	76.04	198.94	218.59	230.77	185.51	191.88	140.93	57.92	70.97	74.85	67.28	70.23	53.87	93.62	132.78	139.65	80.11	73.21	74.49	199.25	190.3	220.63	130.32	122.57	178.77
CiPaw.08G155100.v1.1	289.27	330.6	347.08	169.7	187.61	170.16	198.9	167.43	168.72	124.2	148.17	137.67	76.34	102.56	89.13	181.4	129.74	152.1	213.49	235.05	253.7	139.74	131.5	148	110.79	109.5	113.4	83.72	93.78	82.58	89.27	129.24	92.64	111.46	108.67	107.78
CiPaw.15G056000.v1.1	34.5	30.57	30.07	24.78	51.19	22.88	41.52	48.34	46.65	54.9	34.77	45.72	93.81	104.02	97.37	96.78	75.92	88.92	76.34	65.89	57.75	174.15	205.39	264.06	185.36	212.46	218.05	136.31	159.27	109.36	70.26	18.25	99.1	31.19	33.26	69.42
CiPaw.04G026900.v1.1	125.28	129.3	111.63	395.79	389.05	378.75	233.43	225.06	209.58	207.35	194.82	181.05	223.77	210.13	195.89	176.24	189.33	185.38	147.37	141.09	161.35	309.67	308.49	311.28	208.8	220.34	204.2	154.22	128.7	164.35	153.16	179.48	147.96	242.03	218.95	201.01
CiPaw.04G009700.v1.1	214.05	227.05	228.66	292.19	261.05	263.72	279.11	213.25	274.44	179.47	193.17	173.37	266.3	224.52	215.91	196.16	192.14	200.21	204.21	245.13	238.21	292.31	323.65	317.23	278.19	279.16	264.05	194.8	194.05	165.12	222.26	319.41	234.17	220.55	169.93	178.34
CiPaw.03G051900.v1.1	1.45	2.04	1.48	90.59	76.23	65.69	113.92	109.6	126.95	92.53	101.41	148.4	73.24	29.46	28.22	12.5	28.22	20.96	6.78	7.85	7.38	51.47	46.86	44.23	76.17	81.34	83.65	113.06	136.1	87.2	26.72	39.12	42.69	17.55	19.03	23.31
CiPaw.01G222200.v1.1	7.19	9.61	11.9	74.03	47.73	89.62	56.09	64.11	42.1	99.9	68.89	74.52	128.41	95.12	155.51	90.11	85.54	94.31	16.97	9.85	18.48	18.03	26.3	20.65	13.64	14.45	14.98	44.91	16.34	25.57	67.96	180.89	62.45	82.24	77.83	65.31
CiPaw.11G161300.v1.1	270.67	277.83	324.03	241.68	264.29	227.71	183.8	167.9	184.17	186.32	167.84	170.66	223.63	271	237.88	284.24	329.25	310.04	271.28	274.22	284.92	263.35	262.6	263.28	208.21	247.33	218.63	205.8	213.01	211.85	257.47	309.95	237.72	378.93	352.9	268.28
CiPaw.10G032600.v1.1	130.64	127.88	118.94	347.48	323.16	350.5	272.54	279.74	261.14	264.8	279.24	260.92	227.1	178.52	201.34	166.55	162.18	156.5	135.76	138.48	147.58	260.91	294.87	251.86	201.59	167.86	183.29	151.36	154.67	171.25	138.1	155.1	142.7	158.54	174.03	167.23
CiPaw.03G195200.v1.1	43.33	37.44	40.86	236.25	209.59	231.06	336.37	382.95	431.7	224.58	243.26	268.74	61.53	60	58.78	60.14	64.76	59.17	83.51	68.46	59.64	90.5	81.86	91.97	130.22	105.69	162.52	134.22	148.93	107.33	50.33	31.27	46.37	61.04	51.38	69.72
CiPaw.01G073700.v1.1	257.48	252.06	227.21	214.49	254.05	223.22	248.17	168.68	194.76	149.97	159.62	165.35	206.88	331.66	246.44	227.92	247.83	222.88	291.01	258.67	304.16	283.33	301.92	277.39	372.61	326.8	256.01	224.2	266.32	291.13	331.17	333.05	293.77	282.59	326.48	293.58
CiPaw.10G003900.v1.1	11.55	13.8	13.71	154.79	148.15	129.72	303.64	242.51	329.7	243.29	277.73	328.93	35.77	11.31	14.29	37.67	37.48	35.73	10.08	12.53	18.86	57.52	70.66	54.3	82.97	92.2	123.74	100.3	98.79	86.44	11.86	17.02	16.32	30.09	26.25	30.09
CiPaw.03G006600.v1.1	108.88	90.98	99.5	1.24	3.09	1.82	5.88	10.31	8.37	23.87	20.23	22.92	49.88	83.45	63.14	106.96	96.37	105.99	119.43	104.17	96.54	18.32	21.73	22.59	42.82	44.46	50.28	56.21	59.73	68.77	77.92	28.81	64.02	64.85	57.73	86.56
CiPaw.07G178800.v1.1	314.72	362.29	364.46	25.3	27.95	29.5	16.12	31.49	17.39	59.3	55.88	53.6	98.21	65.68	98.08	61.83	53.23	76.09	15.71	17.77	21.77	31.02	30.22	25.67	102.68	92.91	124.43	124.23	97.93	68.29	105.12	93.64	115.58	62.29	74.86	82.4
CiPaw.07G223400.v1.1	80.31	110.86	112.58	4.03	4.83	6.94	6.91	30.64	7.85	39.02	54.04	62.4	202.82	69.28	159.09	51.17	59.06	46.15	3.93	2.97	4.44	8.77	7.04	4.49	23.65	24.34	41.61	56.27	30.18	23.69	84.03	133.39	75.15	92.88	43.33	62.64
CiPaw.15G148700.v1.1	115.63	161.32	161.58	30.76	31.41	33.69	39.03	57.47	35.99	55.4	74.12	62.73	220.28	184.56	242.99	159.42	143.07	137.54	32.24	41.83	38.51	21.18	20.25	17.35	49.83	37.61	53.63	71.95	55.02	43.23	161.62	148.42	139.72	110.11	129.21	148.92
CiPaw.04G057200.v1.1	118.86	125.07	105.55	343.85	339.77	324.11	254.79	241.96	229.28	206.53	232.18	218.81	236.34	206.17	196.62	159.3	187.15	154.7	160.14	172.16	160.28	369.3	400.37	351.45	237.5	210.42	196.71	165.29	179.98	184.98	181.53	166.5	178.11	167.36	201.74	179.36
CiPaw.16G099700.v1.1	162.17	169.08	166.75	52.53	50.81	57.49	63.71	74.8	73.42	73.92	74.56	82.73	102.21	131.03	97.27	133.02	131.97	144.32	227.75	220.43	204.12	92.5	72.8	57.19	68.98	69.11	51.88	103.91	122.06	96.51	152.51	121.59	184.11	174.44	120.05	145.37
CiPaw.06G106800.v1.1	183.94	174.21	179.5	194.44	188.2	206.8	136.62	194.82	173.15	236.71	243.25	219.86	83.82	98.68	94.02	153.93	126.45	121.9	152.7	131.6	139.22	255.51	243.31	250.86	188.15	165.81	234.17	165.49	151.86	203.92	183.52	129.68	140.23	244.53	198.47	189.74
CiPaw.04G002300.v1.1	155.14	159.21	139.7	221.5	216.65	235.21	186.18	223.77	203.67	263.33	238.12	227.18	185.45	149.79	145.19	137.97	160.78	146.57	176.77	196.54	185.45	254.55	229.8	236.49	197.44	216.3	259.67	250.42	182.33	204.21	148.72	117.69	168.34	205.33	127.94	187.43
CiPaw.02G061600.v1.1	156.67	170.18	152.87	362.87	305.46	312.74	273.96	251.02	283.36	239.85	244.18	261.06	221.91	197	211.62	186.93	244.11	203.14	175.02	174.46	193.03	300.63	300.22	280.21	219.81	223.73	214.17	188.67	189.13	186.88	177.01	199.06	179.37	227.52	276.14	234.48
CiPaw.15G174800.v1.1	198.81	189	190.57	99.17	111.09	101.5	95.22	170.89	135.46	161.1	153.86	137.05	197.83	152.61	213.52	162.62	165.88	166.22	65.29	61.4	67.1	91.23	93.22	95.49	156.79	129.99	151.82	223.77	166.23	186.43	219.74	219.66	214.07	204.39	191.94	177.73
CiPaw.09G063300.v1.1	129	119.24	123.77	152.36	179.57	152.71	259.43	168.86	211.48	133.82	132.32	122.92	100.31	120.36	103.59	125.06	138.69	142.65	250.74	284.98	248.39	131.53	186.55	196.81	185.06	224.05	174.03	106.62	96.25	94.5	106.12	134.7	79.82	98.05	78.2	65.13
CiPaw.04G042400.v1.1	100.86	121.17	117.08	223.23	224	196.91	232.5	218.01	219.08	203.43	231.16	215.33	158.42	160.41	156.12	133.66	121.29	108.54	207.29	192.56	170.44	266.31	326.89	288.94	206.98	193.34	195.87	177.15	177.54	206.8	151.25	142.56	138.28	151.13	162.87	146.62
CiPaw.02G024000.v1.1	16.02	8.19	8.02	99.14	133.1	121.68	39.76	32.01	38.32	58.77	27.72	21.52	25.74	39.46	34.23	41.4	62.87	61.95	15.6	10.1	17.77	218.07	197.9	277.8	50.35	41.82	53.09	63.28	45.09	85.48	111.95	264.53	95.71	232.02	141.03	121.67
CiPaw.14G071900.v1.1	91.66	106.99	95.99	263.32	249.32	240.66	201.24	191.37	196.55	182.56	180.9	168.71	157.44	141.97	144.07	98.74	116.3	117.47	118.67	105.25	104	223.63	234.5	215.09	179.58	174.85	153.1	117.35	131.01	153.1	113.24	125.99	112	125.75	144.07	127.42
CiPaw.03G102100.v1.1	99.82	169.3	127.84	11.07	9.81	7.54	12.09	27.77	4.34	18.28	28.07	40.91	270.69	127.56	190.23	116.66	174.41	112.21	3.66	7.09	8.07	12.38	14.14	13.39	34.71	41.2	66.98	85.08	37.43	28.48	121.93	187.56	156.03	93.73	48.98	120.08
CiPaw.03G041200.v1.1	134.61	114.99	139.77	32.04	35.45	41.72	59.97	79.61	75.18	74.11	56.45	71.5	87.09	82.06	89.89	207.12	211.39	199.7	30.95	34.26	25.57	29.11	21.56	37.82	117.33	88.91	138.41	63.8	94.61	76.39	99.75	43.59	90.03	85.94	112.03	114.15
CiPaw.01G018300.v1.1	292.39	275.99	267.27	180.67	198.68	228.68	252.81	217.43	218.75	257.43	221.45	216.27	344.67	298.89	325.23	344.67	263.14	279.9	316.37	352.16	352.32	217.89	226.52	230.66	229.81	246.88	262.79	298.48	283.05	245.76	273.89	282.23	294.76	284.04	202.3	255.63
CiPaw.06G160800.v1.1	113.26	109.78	110.61	194.87	203.01	169.63	219.36	167.88	206.56	166.21	177.3	180.38	169.04	111.15	115.98	109.82	96.29	108.8	145.02	155.07	155.89	164.35	179.8	178.74	152.44	167.43	144.11	129.28	139.03	120.56	92.68	98.82	99.85	80.58	75.67	75.66
CiPaw.03G041100.v1.1	340.74	323.26	302.67	270.41	281.22	293.56	337.79	376.68	336.58	219.22	225.64	208.09	284.52	365.16	313.73	301.7	279.21	274.29	361.35	376.65	385.35	320.16	320.77	322.57	357.3	297.29	284.97	235.48	268.91	289.61	255.96	230.9	276.47	195.39	253.58	236.32
CiPaw.01G076700.v1.1	196.88	231.44	184.72	53.41	59.82	45.24	27.92	23.43	22.24	26.18	25.14	22.32	52.22	79.3	66.35	78.59	105.02	85.86	153.85	170.25	159.41	93.03	64.65	72	55.96	52.33	41.09	41.89	50.87	37.75	126.82	137.92	98	231.53	151.23	182.5
CiPaw.08G031100.v1.1	185.09	251.49	196.03	23.87	26.75	24.52	53.89	40.89	41.31	49.35	39.06	53.82	80.81	71.59	82.92	59.02	54.17	49.48	22.38	22.24	18.92	30.98	25.01	28.54	71.92	74.26	105.96	172.18	111.29	95.8	114.42	166.53	129.31	112.65	64.26	90.79
CiPaw.06G084700.v1.1	117.83	132.5	120.61	296.61	259.15	236.15	247.13	224.34	280.36	196.45	214.68	213.74	182.32	170.39	175.62	108.69	158.48	146.18	151.66	134.27	152.14	271.27	279.79	258.82	206.08	207.58	182.38	151.54	147.65	156.65	135.4	170.83	145.21	154.5	197.18	160.46
CiPaw.07G221600.v1.1	84.65	86.94	81.29	29.84	36.38	29.49	26.09	29.53	28.33	42.39	35.36	47.69	90.85	112.63	95.11	84.43	124.76	125.52	117.16	104.01	100.82	43.96	43.1	47.07	73.61	62.37	66.8	60.33	67.63	61.45	128.99	111.16	123.19	112.28	104.26	157.58
CiPaw.12G044300.v1.1	0	0	0	0	1.83	5.33	3.48	0	10.07	0	0	0	39.68	131.48	45.73	68.46	0	14.16	317.19	311.46	293.14	94.23	24.36	32.83	32.9	34.27	18.06	76.43	108.81	98.83	67.49	59.11	102.48	55.87	57.57	157.18
CiPaw.10G167800.v1.1	147.67	139.91	136.55	60.66	69.41	54.86	44.27	54.01	56.01	68.1	71.57	73.66	72.41	106.61	89.21	104.78	126.98	128.82	169.65	155.52	161.44	84.79	80.08	87.64	102.55	92.18	99.36	103.73	118.88	102.76	144.96	141.65	139.81	189.52	145.94	172.04
CiPaw.04G092100.v1.1	77.02	63.76	69.17	217.82	193.76	258.84	121.86	149.06	131.21	101.24	129.05	111.11	111.33	69.31	95.68	108.89	75.1	72.22	53.97	59.92	78.71	196.97	189.56	196.02	61.13	82.05	78.34	43.08	53.73	52.6	38.74	43.81	41.72	21.96	27.96	31.32
CiPaw.14G076500.v1.1	189.83	210.44	202.63	208.71	209.49	281.56	132.23	136.07	125.94	171.64	160.41	151.45	246.34	223.13	264.75	228.16	178.06	197.1	109.85	107.97	123.17	163.42	158.32	174.8	124.63	120.16	129.78	165.59	150.74	169.08	203.18	218.38	221.43	201.54	194.04	229.9
CiPaw.07G190600.v1.1	61.39	75.44	62.02	10.58	10.16	4.88	22.24	11.56	19.08	20.88	14.58	16.34	118.48	81.36	90.81	121.05	100.93	149.21	83.98	110.76	94.11	45.24	35.73	59.57	57.65	41.62	52.02	50.54	48.02	28.84	105.55	136.48	193.46	62.36	52.03	52.43
CiPaw.01G029600.v1.1	69.74	60.22	67.8	100.39	98.05	92.32	101.59	138.81	142.41	141.74	129.46	131.48	76.23	72.26	71.73	67.36	52.28	50.91	53.51	47.71	46.79	101.73	85.01	94.67	172.32	165.29	188.38	218.8	260.27	212.89	88.25	31.26	88.32	31.78	63.24	96.7
CiPaw.02G066100.v1.1	237.58	249.22	233.03	17.68	43.85	26.56	28.69	32.72	30.56	39.08	37.19	34.67	60.2	141.11	106.73	201.16	185.85	127.34	60.44	77.02	69.56	44.44	41.78	33.06	61.56	62.06	66.26	82.62	63.88	47.76	139.01	134.22	158.11	112.18	165.44	263.3
CiPaw.16G116500.v1.1	141.46	140.41	119.48	346.62	323.84	301.04	233.3	216.11	263.08	252.87	221.76	217.46	214.1	190.54	198.98	150.2	192.74	182.51	176.11	167.51	165.78	295.07	282.47	284.2	199.09	226.43	238.28	189.16	148.15	135.27	178.78	185.85	171.94	294.73	232.64	175.69
CiPaw.04G021900.v1.1	74.51	112.75	98.7	4.45	2.14	3.87	6.81	18.49	7.7	38.4	37.03	50.1	97.02	51.69	78.09	41.1	56.44	42.61	0.21	0.56	0.63	6.29	5.67	2.91	41.42	54.19	56.09	67.91	39.04	37.74	91.74	176.96	72.94	82.19	48.32	57.7
CiPaw.09G173400.v1.1	134	139.35	132.27	257.19	298.08	236.73	258.7	239.18	237.62	173.12	177	188.88	223.75	201.48	210	166.38	173.3	180.48	239.08	250.75	233.08	283.4	337.38	341.81	282.79	260.01	227.25	168.84	174.43	176.62	193.9	226.06	178.42	144.76	171.05	154.17
CiPaw.02G191000.v1.1	293.18	326.87	291.47	523.03	542.14	446.46	355.36	375.93	379.35	366.34	361.46	369.32	323.28	319.38	316.1	319.32	340.7	318.98	289.92	294.76	279.6	394.45	435.47	375.92	332.77	299.28	320.5	291.99	330.74	300.99	299.05	277.07	276.57	385.3	383.92	315.71
CiPaw.03G169100.v1.1	39.4	53.26	50.81	110.16	105.98	87.66	464.63	351.81	666.79	136.06	224.89	238.7	5.94	3.71	7.79	42.83	73.87	68.4	57.84	73.36	68.14	79.63	89.66	125.38	88.41	69	74.87	28.87	55.18	44.65	10.41	7.75	9.18	27.64	19.25	47.83
CiPaw.06G042400.v1.1	210.11	173.23	194.58	222.67	252.29	282.76	282.11	317.76	271.78	283.28	262.11	244.15	253.98	229.86	267.06	256.5	319.19	294.52	120.64	135.58	136.28	265.18	244.73	231.72	251.19	295.17	304.31	229.26	212.19	213.66	209.73	234.32	205.37	365.91	147.63	234.52
CiPaw.12G097300.v1.1	147.85	158.98	148.79	259.12	280.87	237.97	228.45	232.31	231.56	179.6	194.34	186.41	199.18	211.19	196.84	189.1	241.25	192.7	154.38	167.73	155.61	234.81	310.53	253.35	231.01	238.69	211.41	170.57	168.28	156.32	178.76	194.41	187.85	267.54	248.8	212.4
CiPaw.01G294800.v1.1	101.58	129.05	130.18	17.47	18.17	23.88	8.59	20.99	7.78	48.56	42.84	50.18	186.32	110.45	182.52	74.27	69.51	79.75	19.37	18.9	24.27	25.67	25.06	24.34	49.36	48.37	65.65	86.99	57.73	47.01	113.77	146.79	128.81	108.52	87.46	120.56
CiPaw.08G061700.v1.1	125.12	160.82	135.75	89.71	77.71	58.55	35.29	25.11	24.49	37.34	31.37	18.75	21.96	28.67	21.37	39.59	29.52	33.96	175.68	168.61	168.68	160.83	130.97	134.87	41.13	81.21	70.27	101.47	142.47	80.52	36.94	41.63	50.07	68.87	32.11	68.9
CiPaw.09G212800.v1.1	0.85	1.01	1.48	145.76	147.26	145.49	101.4	131.99	107.39	111.55	91.25	90.99	142.17	77.52	107.05	147.39	104	67.97	8.75	13.47	24.25	76.22	92.17	101.34	37.05	33.75	41.65	49.41	36.21	56.14	56.05	135.13	72.64	80.95	110.71	105.6
CiPaw.12G010300.v1.1	65.65	69.79	60.29	71.42	71.93	54.28	52.72	56.41	51.53	73.48	77.61	96.85	132.04	183.31	157.82	120.07	251.21	204.76	120.86	108.36	114.59	60.28	62.31	69.54	122.89	100.51	92.6	92.03	102.36	97.74	187.43	157.48	183.3	144.34	147.49	185.74
CiPaw.01G143300.v1.1	0	0.24	0	169.31	151.68	175.27	90.04	93.53	79.47	50.7	48.54	24.23	20.48	11.46	30.26	6.63	4.8	6.2	0.23	0.69	0.23	166.79	133.07	149.23	92.75	77.65	118.74	79.54	42.02	122.96	20.91	15.63	28.43	6.77	36.56	5.33
CiPaw.05G035100.v1.1	113.42	129.5	126.33	71.86	76.8	81.47	53.71	66.98	48.64	61.92	62.45	63.3	176.64	201.48	181.2	204.72	201.48	194.52	103.37	112.34	110.98	62.41	63.97	60.02	44.63	47.03	51.93	68.29	71.11	62.19	157.65	184.1	221.02	113.53	165.65	229.73
CiPaw.04G169200.v1.1	300.56	333.08	305.08	251.65	262.06	219.72	233.79	197.6	216.32	233.73	262.65	235.63	221.84	287.21	221.66	277.43	295.42	286.46	336.52	369.86	363.93	336.2	356.96	302.55	251.73	235.71	229.12	261.03	261.32	239.32	257.12	291.89	228.85	315.85	352.17	267.77
CiPaw.04G155300.v1.1	19.55	13.52	13.26	214.2	169.07	246.97	644.4	567.88	673.02	301.97	452.53	416.46	48.26	35.3	64.71	40.04	69.41	47.92	13.36	12.02	9.15	47.73	41.61	46.11	100.88	69.14	85.78	80.93	108.92	96.94	27.58	19.76	24.27	29.9	22.94	56.4
CiPaw.07G211500.v1.1	148.08	184.23	176.23	78.44	85.45	91.63	68.12	92.43	76.06	125.95	96.62	111.55	160.68	149.95	174.38	127.63	162.54	138.75	83.97	93.29	109.44	140.15	134.49	112.75	132.68	145.21	157.03	225.34	154.75	164.11	187.13	280.89	175.64	290.17	203.8	195.89
CiPaw.07G210000.v1.1	52.69	74.84	65.93	62.25	61.78	65.41	27.98	20.86	21.82	32.49	32.79	35.97	64.45	161.8	115.26	112.72	133.74	114.2	40.62	49.01	70.05	154.13	138.76	113.94	54.5	57.53	52.22	76.18	52.25	44.83	150.33	415.47	141.54	178.96	158.2	306.58
CiPaw.10G146200.v1.1	66.06	95.2	84.68	88.85	81.79	100.24	46.14	57	35.43	47.59	44.96	43.47	250.63	178.51	226.96	166.21	179.39	141.63	62.1	66.14	78.45	70.62	91.9	66.87	31.92	33.35	40.67	72.73	49.09	46.7	141	176.68	160.88	108.44	102.33	161.18
CiPaw.11G148900.v1.1	0.05	0.15	0	90.78	97.13	104.59	83.23	117.34	89.52	124.61	60.75	36.07	28.72	20.45	49.58	15.15	19.32	29.99	0.05	0.1	1.6	92.03	155.03	71.97	70.56	52.99	54.55	95.3	46.24	112.01	33.82	59.94	33.81	32.97	85.27	22.17
CiPaw.11G139300.v1.1	40.21	28.37	34.56	98.75	92.26	96.21	158.73	127.39	138.17	97.3	115.63	102.37	47.09	23.1	38.29	34.87	22.52	23.59	97.78	99.3	84.2	76.89	98.45	94.95	90.42	107.12	102.71	57.61	62.31	47.94	18.58	13.08	23.85	15.44	12.55	16.31
CiPaw.13G074900.v1.1	65.48	85.02	77.68	17.83	15.87	24.93	45.61	98.06	55.95	124.17	183.66	152.92	207.43	91.05	208.8	105.37	81.15	61.9	1.33	1.3	0.99	11.87	7.18	7.06	70.19	94.67	116.71	79.07	46.28	46.2	107.48	127.75	75.72	70.54	39.52	70.49
CiPaw.11G130600.v1.1	117.39	130.65	123.62	368.42	337.11	318.47	232.77	211.16	214.31	195.38	194.2	206.41	219.07	189.12	194.24	154.9	191.71	158.66	148.47	151.17	148.22	306.42	297.39	270.98	202.52	197.16	193.22	183.11	160.26	152.73	161.41	188.76	170.49	216.81	235.5	189.9
CiPaw.06G162300.v1.1	24.94	35.2	14.28	179.14	158.51	137.86	119.65	148.56	119.05	91.81	140.62	110.82	89.86	61.23	91.2	33.2	57.24	41.29	36.09	25.8	25.87	56.52	38.15	60.45	127.11	129.95	112.61	62.46	66.66	68.58	76.6	47.07	71.36	65.75	97.02	80.42
CiPaw.02G077500.v1.1	53.38	64.23	40.01	51.39	41.31	51	56.13	50.34	54.17	87.31	75.37	57.62	117.73	112.58	127.23	83.21	158.36	112.48	106.61	105.02	113.56	71.69	66.49	64.08	142.44	112.93	118.94	174.88	117.45	102.1	115.86	130.51	137.37	231.84	107.35	140.58
CiPaw.02G168800.v1.1	105.35	122.47	117.9	222.94	207.86	182.41	224.7	215.06	214.38	190.07	198.16	207.32	155.8	144.38	141.37	104.67	138.92	119.99	112.83	103.54	90.05	215.04	231.46	190.01	173.19	159.34	159.67	133.68	128.33	134.7	113.36	130.36	114.16	151.99	148.76	131.9
CiPaw.07G042100.v1.1	19.37	19.06	20.93	63.73	65.66	54.15	133.76	95.69	148.11	154.91	215.05	229.06	64.05	90.38	70.3	30.35	32.87	32.97	14.09	14.89	14.45	52.95	54.43	45.47	109.34	103.55	93.33	193.42	137.67	148.4	86.09	39.91	46.56	52.99	51.16	38.39
CiPaw.01G117200.v1.1	170.15	180.17	165.98	330.93	368.24	315.31	257.01	257.41	245.6	227	279.25	255.64	227.14	190.18	201.68	141.43	174.65	142.82	186.35	199.55	191.03	369.94	382.31	346.75	217.57	210.46	178.12	175.64	197.76	188.67	165.8	144.04	158.31	130	200.58	153.19
CiPaw.09G018300.v1.1	297.55	305.89	295.68	207.41	245.05	224.49	269.35	260.33	260.24	229.09	230.75	233.8	244.26	331.48	259.5	354	312.06	313.46	391.13	370.27	360.96	319.4	326.1	306.99	314.34	334.69	348.9	295.95	292.4	318.92	324.13	307.93	301.81	372.11	346.95	326.4
CiPaw.03G034400.v1.1	311.53	329.84	292.55	32.94	39.97	41.68	82.81	86.05	73.68	83.66	78.7	95.39	317.43	218.4	377.13	132.59	134.47	124.88	76.41	97.04	117.49	63.87	43.61	44.68	111.3	131.06	147.78	107.23	83.64	77.58	235.09	210.04	250.75	133	83.76	141.72
CiPaw.13G041400.v1.1	137.94	155.58	137.83	386.02	360.08	353.13	304.41	298.95	295.41	256.71	308.49	270.56	228.78	183.3	219.22	161.79	185.09	163.5	165.83	160.39	141.92	295.85	346.57	280.18	227.93	190.65	195.44	159.13	180.82	189.34	167.34	173.6	163.32	162.54	203.81	173.99
CiPaw.03G082700.v1.1	130.19	120.22	122.44	12.89	13.57	6.33	59.06	37.36	72.34	125.43	161.69	154.2	57.71	114.28	70.99	47.45	62.28	71.19	102.64	88.66	86.64	70.54	81.54	55.4	122.78	169.41	146.85	166.58	158.53	158.65	76.33	37.41	70.97	55.71	51.75	71.08
CiPaw.13G122800.v1.1	69.51	65.41	63.18	169.39	153.71	171.51	160.74	160.2	176.58	175.46	175.36	183.86	139.65	128.17	127.34	95.44	110.28	106.84	67.49	77.56	83.7	163.99	184.42	158.35	155.83	154.66	147.19	187.61	208.35	169.76	111.44	98.02	116.15	92.35	103.62	100.11
CiPaw.10G022800.v1.1	95.06	98.21	90.61	75.65	67.11	66.99	56.56	72.38	63	74.05	83.62	77.22	113.9	77.68	89.49	109.06	139.4	102.57	0.15	0.78	2.99	5.86	14.72	20.89	22.43	20.85	23.43	24.5	11.03	24.5	59.53	69.69	33.58	77.89	33.09	23.71
CiPaw.03G047300.v1.1	125.17	142.6	131	29.05	28.5	21.68	37.3	25.24	33.75	20.1	15.24	17.57	95	132.67	86.62	135.44	90.34	129.57	112.99	122.1	97.96	81.66	65.17	58.96	22.03	39.85	26.82	56.47	76.43	44.23	42.71	23.86	64.22	30.99	16.71	61.17
CiPaw.11G141400.v1.1	40.8	62.06	55.65	2.56	3.28	2.54	24.42	32.31	18.22	48.64	29.26	69.29	217.39	64.61	135.66	27.51	40	31.13	1.17	1.54	1.79	10.07	11.2	3.57	74.53	85.04	144.73	146.31	58.66	61.13	154.82	224.09	130.99	123.73	38.3	76.29
CiPaw.01G256600.v1.1	31.23	26.21	30.94	146.52	144.57	151.23	160.87	166.86	170.85	134.34	166.93	139.45	71.47	67.26	76.95	89.89	67.13	61.96	48.35	46.08	45.95	101.95	95.78	97.53	112.58	106.37	111.23	108.39	93.53	108.83	56.38	67.87	62.44	44.35	50.32	63.95
CiPaw.02G161600.v1.1	139.25	139.03	115.84	302.31	284.46	244.84	257.93	256.42	248.74	192.16	233.94	217.16	204.3	198.38	194.95	157.21	189.34	158.9	154.15	152.8	151.62	279.9	335.8	279.66	208.94	163.88	156.85	133.52	163.81	168	136.75	147.27	140.6	134.22	175.4	149.16
CiPaw.06G064700.v1.1	167.32	132.22	137.47	98.5	105.89	112.74	92.13	138.21	109.87	181.55	135.53	157.29	147.54	176.89	161.59	260.82	264.77	273.92	118.23	116.91	120.44	66.7	66.02	70.78	95.65	80.44	92.09	114.45	128.06	157.12	174.02	107.8	165.36	181.9	238.29	194.87
CiPaw.07G010600.v1.1	39.37	34.07	34.01	72.01	81.61	98.39	96.45	87.82	85.69	62.79	54.14	79.67	85.45	129.02	122.47	78.42	142.39	88.28	87.14	96.52	84.17	145.93	109.64	141.23	278.88	157.32	152.21	136.93	183.56	187.23	214.86	172.08	134.22	131.05	235.77	200.26
CiPaw.09G013800.v1.1	139.53	151.86	144.62	280.86	267.25	266.77	241.93	239.57	245.16	214.29	234.6	225.25	188.57	179.71	186.11	148.52	151.14	141.41	163.46	159.03	152.61	268.31	283.19	256.17	201.47	196.05	187.64	173.87	180.53	184.86	149.49	163.46	154.33	148.6	180.04	146.52
CiPaw.05G073800.v1.1	429.29	425.25	396.33	338.49	369.21	350.64	342.75	368.18	358.79	356.9	377.3	344.2	371.25	426.98	401.99	432.15	386	392.05	490.74	466.16	470.48	532.07	534.4	510.12	448.82	416.72	419.34	361.73	406.54	438.64	386.59	396.84	373.45	349.8	375.32	395.18
CiPaw.11G173400.v1.1	79.89	68.74	75.63	53.89	50.43	45.68	50.29	69.5	77.68	109.09	100.82	115.15	40.46	46.05	44.35	36	30.67	27.13	67.79	52.28	58.49	126.62	110.12	104.89	230.28	218.02	223.73	249.55	333.56	259.59	100.43	30.33	113.9	34.41	81.95	115.96
CiPaw.07G153300.v1.1	11.22	6.88	8.74	85.27	68.12	87.79	88.05	137.74	96.04	213.72	131.37	141.69	187.72	89.99	135.45	74.57	117.02	132.7	13.03	2.73	4.59	27.22	17.91	57.15	62.2	47.04	79.43	84.54	54.65	91.54	102.12	95.28	52.35	48.87	91.34	81.44
CiPaw.08G068300.v1.1	195.96	203.45	187.39	301.8	302.63	332.93	257.61	287.26	267.84	308.01	286.07	284.26	252.55	243.64	253.61	217.62	243.53	224.26	212.06	225.26	217.93	292.2	294.09	296.77	295.06	288.32	321.77	264.56	247.28	262.13	223.16	222.61	218.04	256	247.4	237.07
CiPaw.03G097900.v1.1	157.08	147.55	153.76	225.29	257.76	215.35	271.94	236.5	263.26	202.8	201.8	206.43	272.85	298.81	259.14	233.75	225.68	230.09	317.7	342.49	317.28	268.57	299.91	286.65	267.23	294.4	257.35	240.55	239.63	200.69	243.2	262.86	238.91	191.6	173.3	162.53
CiPaw.06G123600.v1.1	141.3	137.55	114	3.41	4.52	3.52	13.86	10.59	12.57	12.36	16.87	18.05	29.64	53.79	35.12	50.08	52.06	60.37	201.46	208.88	170.32	34.32	35.19	30.15	48.17	49.43	56.74	53.96	76.61	42.63	92.4	44.83	90.46	107.02	70.59	107.83
CiPaw.01G054200.v1.1	68.7	66.5	75.03	248.86	201.71	256.61	144.39	160.4	168.52	179.59	190.23	195.08	135.82	132.59	130.75	106.39	98.81	101.46	78.77	73.16	75.61	162.06	173.32	153.77	113.55	119.87	129.75	136.01	114.28	156.76	94.52	138.09	97.49	79.48	106.62	80.42
CiPaw.01G254000.v1.1	81.07	99.18	87.82	231.77	224.17	195.73	206.17	177.57	173.5	136.96	162.69	152.05	143.05	130.43	137.08	90.93	119.94	95.88	111.56	101.81	102.9	249.95	229.63	221.32	187.18	156.69	174.16	129.01	124.84	130.82	114.62	130.72	106.58	146.39	135.68	139.69
CiPaw.09G078400.v1.1	269.16	246.6	286.9	55.81	74.45	50.89	60.83	74.71	95.07	94.49	74.7	82.46	110.45	167.39	115.82	143.54	96.31	136.27	158.4	157.28	171.58	167.83	130.93	105.14	61.64	93.22	74.82	70.6	88.91	87	93.81	47.63	90.93	58.9	54.82	59.68
CiPaw.03G166500.v1.1	94.44	96.62	98.21	58.94	52.73	54.95	125.28	135.09	148.58	160.5	209.92	216.43	112.57	72.52	113.03	96.42	77.15	90.6	34.71	36.65	34.2	62.22	53.75	45.78	91.19	75.57	100.06	128.26	135.74	103.23	71.77	58.35	102.46	56.48	44.61	58.92
CiPaw.10G067300.v1.1	22.1	23.84	21.24	71.84	59.98	60.32	99.01	94.26	131.11	90.66	119.71	123.81	37.7	38.81	35.8	62.36	42.13	43.92	17.14	19.23	27.6	120.7	109.61	87.74	86.22	92.01	88.44	100.76	124.65	101.53	35.96	26.8	40.57	25.89	36.9	58.76
CiPaw.13G164000.v1.1	179.23	198.48	170.27	329.91	282.88	245.42	272.97	246.16	252.94	223.57	292.15	242.89	205.62	216.62	209.61	135.65	214.23	191.14	180.71	180.4	185.93	330.57	330	320.47	277.88	269.51	251.58	177.17	228.1	205.88	216	217.08	210.64	188.57	266.98	234.72
CiPaw.03G275400.v1.1	0.51	0	0.13	294.65	185.59	219.67	283.95	155.74	225.42	75.04	77.82	115.25	49.88	16.16	19.8	3.42	10.93	9.71	0	0	0	56.33	74.08	71.68	36.47	41.73	67.77	39.64	32.98	48.28	16.39	25.87	22.49	8.04	6.29	4.41
CiPaw.14G118100.v1.1	93.59	81.21	90.05	65.26	59.19	58.9	124.67	235.98	223.64	163.64	176.58	184.78	82.29	103.68	89.46	87.14	80.81	79.53	60.1	49.24	46.21	86.65	77.08	104.89	295.41	259.91	252.53	240.96	304.33	262.3	123.17	40.08	117.85	36.12	70.23	102.68
CiPaw.11G210500.v1.1	103.43	86.04	117.1	53.35	66.18	50.81	48.47	76.95	67.99	120.74	95.91	117.57	106.65	108.25	110.96	113.02	94.28	81.82	46.62	44.98	54.16	70.12	69.84	80.1	189.1	214.12	216.59	292.61	262.06	260.96	161.13	56.83	163.33	89.24	132.22	196.49
CiPaw.16G084100.v1.1	93.57	94.86	84.44	30.17	35.4	22.94	18.08	15.55	23.06	16.61	20.41	19.35	30.3	86.66	53.7	63.18	136.24	116.08	80.07	70.35	78.47	180.76	100.46	172.68	77.62	47.62	49.72	52.16	57.41	67.38	83.97	106.57	72.51	168.17	205.2	125.09
CiPaw.14G034300.v1.1	93.46	101.93	96.32	239.36	197.11	186.79	149.85	160.47	168.06	159.17	166.38	142.48	129.56	80.4	112.07	75.09	113.76	92.93	86.41	90.83	80.45	217.77	219.66	202.32	142.37	164.41	145.71	114.82	119.54	130.46	98.69	91.79	100.88	122.61	145.56	128.24
CiPaw.01G135800.v1.1	13.81	11.13	17.25	27.57	21.88	45.14	43.75	71.77	60.8	52.8	49.38	42.03	107.23	186.64	105.18	276.94	75.02	141.6	84.81	91.86	117.95	56.64	77.64	70.96	91.7	123.13	98.68	62.67	63.91	54.15	39.76	5.63	37.51	7.86	23.49	4.45
CiPaw.15G144100.v1.1	31.37	30.45	30.74	149.94	155.37	167.83	126.58	141.02	122.65	120.35	121.45	118.1	120.83	101.56	132.57	78.99	75.4	83.34	24.31	19.18	21.45	71.36	69.45	59.4	68.92	42.96	43.15	57.1	66.99	81.25	74.06	79.25	72.93	62.61	74.71	77.13
CiPaw.12G060700.v1.1	108.85	139.59	121.48	138.35	135.26	126.72	164.07	198.7	175.99	177.35	180.93	185.1	243.87	235.11	238.9	204.36	214.65	224.63	259.44	228.21	234.21	245.24	236.57	228.06	224.15	196.97	172.03	166.77	206.24	192.65	161.24	214	203.01	106.7	137.73	193.63
CiPaw.04G042000.v1.1	238.67	252.11	264.24	484.29	376.88	499.28	303.06	399.06	321.39	266.66	282.97	272.49	247.44	198.44	191.15	270.23	224.1	232.81	269.89	256.3	275.24	194.27	167.35	187.85	194.42	229.86	240.67	208.88	208.5	191.72	199.49	298.67	227.38	215.36	232.64	239.6
CiPaw.01G014300.v1.1	70.45	72.96	71.06	161.94	145.88	175.45	300.2	396.6	318.07	360.54	333.54	360.94	259.78	194.76	253.13	186.99	167.85	136.47	54.36	60.5	61.68	105.83	116.4	112.86	161.53	151.63	169.52	149.99	130.78	183.53	163.06	164.82	170.23	140.4	150.41	147.15
CiPaw.16G097200.v1.1	35.22	40.88	42.42	273.07	251.63	254.67	133.87	121.58	117.57	128.49	108.56	113.66	88.52	55	62.14	47.22	56.58	61.41	52.67	47.92	46.56	139.37	148.8	175.99	84.12	89.24	99.48	71.42	78.71	84.74	61.71	80.37	63.93	47.23	55.49	37.28
CiPaw.13G062400.v1.1	236.16	224.63	245.47	333.98	334.18	308.3	331.63	317.09	351.67	296.25	278.37	264.32	280.85	354.36	335.76	365.92	381.28	368.57	356.87	366.99	367.72	307.99	375.32	345.63	358.78	410.75	382.08	299.78	289.7	285.58	309.27	320.09	309.5	419.3	314.93	295.64
CiPaw.08G013800.v1.1	256.16	270.8	244.12	455.33	450.51	451.42	339.74	335.6	335.71	303.22	272.49	258.07	321.72	308.55	328.76	251.73	320.05	295.51	379.85	359.41	336.46	481.27	466.59	552.17	398.28	438.3	387.41	303.73	283.89	299.66	312.94	315.09	315.11	349.09	333	309.06
CiPaw.09G117900.v1.1	73.21	62.95	56.57	6.23	5.97	2.42	7.28	3.69	6.01	5.04	4.56	8.84	23.92	50.34	30.1	42.66	71.97	55.13	120.49	113.56	110.39	25.65	20.05	27.84	39.4	34.7	32.92	38.01	52.11	30.49	124.88	139.05	121.98	150.67	88.49	132.67
CiPaw.16G087600.v1.1	115.34	146.64	144.59	224.87	215.41	190.83	232.69	216.19	227.39	202.3	217.21	217.17	175.31	182.74	170.24	117.35	144.76	139.93	161.57	142.78	133.54	244.42	263.63	233.51	234.46	224.15	205.35	188.96	186.98	178.74	159.3	153.35	148.64	187.62	195.42	160.01
CiPaw.05G154500.v1.1	128.87	117.9	106.46	360.42	268.02	367.86	188.54	199.02	178.08	216.73	164.46	214.88	119.42	133.35	133.01	127.14	136.66	127.12	164.11	142.05	156.24	169.51	159.67	198.31	184.92	216.49	185.67	179.78	144.35	165.69	152.92	152.63	203.8	174.87	131.13	221.05
CiPaw.14G079000.v1.1	356.66	374.43	323.64	0	0.2	0.31	0.44	0.07	0.48	0.1	0.13	0.34	9.65	20.12	9.93	73.69	59.03	76.04	221.4	255.51	241.75	50.5	37.21	38.76	19.84	27.36	39.17	13.35	23.38	8.6	112.91	13.98	125.23	58.61	43.34	114.43
CiPaw.05G156300.v1.1	128.87	117.9	106.46	360.42	268.02	367.86	188.54	199.02	178.08	216.73	164.46	214.88	119.42	133.35	133.01	127.14	136.66	127.12	164.11	142.05	156.24	169.51	159.67	198.31	184.92	216.49	185.67	179.78	144.35	165.69	152.92	152.63	203.8	174.87	131.13	221.05
CiPaw.05G260700.v1.1	57.78	65.22	57.96	17.97	17.85	18.19	33.03	54.74	41.84	68.61	86.05	87.64	100.63	99.7	122.47	99.69	58.84	54.74	5.62	12.01	14.71	33.25	33.87	20.68	65.58	56.97	74.09	128.3	78.39	127.83	114.26	111.47	103.43	65.61	76.74	65.56
CiPaw.03G000900.v1.1	0.49	0.49	0.22	165.72	189.13	218.99	45.69	51.67	53.02	80.16	41.66	31.19	58.7	50.78	90.97	96.88	73.78	61.53	16.16	11.74	33.43	285.53	259.88	373.35	86.18	53.4	64.96	128.07	60.39	154.38	58.74	224.55	86.58	106.62	129.37	81.55
CiPaw.09G127000.v1.1	162.58	148.51	151.76	55.75	74.22	46.55	66.59	70.51	86.66	62.56	67.47	74.34	74.94	123.5	92.3	168.89	143.61	141.46	194.47	184.62	167.79	91.52	84.76	89.17	148.4	166.26	163.87	168.61	192.37	163.26	145.81	109.73	161.09	157.28	146.13	173.36
CiPaw.11G094300.v1.1	346.59	349.98	352.22	181.16	214.78	251.53	188.58	253.52	204.18	236.55	294.13	213.08	174.01	215.68	278.99	293.21	236.52	241.53	135.04	133.93	191.45	263.37	240.24	216.27	171.5	187.49	213.51	236.02	226.94	204.75	216.74	249.23	308.75	289.38	242.49	303.21
CiPaw.02G150300.v1.1	138.06	138.91	134.27	152.91	141.89	114.77	224.32	131.18	172.94	77.05	90.87	73.36	87.35	84.06	72.73	134.63	121.02	140.65	233.01	276.99	239.57	103.3	132.41	136.1	91.6	122.14	88.9	45.88	47.27	46.66	46.57	80.18	45.24	29.82	35.69	30.36
CiPaw.03G169400.v1.1	14.67	9.56	7.54	85.98	127.4	78.18	315.39	210.69	341.09	85.31	156.85	165.43	12.13	13.35	3.12	58.47	60.57	58.45	31.21	45.39	54.63	61.91	58.98	64.65	31.82	44.19	47.34	26.37	72.6	32.02	13.61	7.56	30.61	13.68	11.62	45.72
CiPaw.07G107600.v1.1	128.82	116.96	102.76	178.63	172.3	169.01	301.49	262.37	292.97	142.46	191.03	174.66	158.43	140.32	139.44	121.62	125.69	130.85	176.9	210.88	189.99	168	159.14	201.16	263.02	208.11	218.62	118.64	150.83	145.52	139.93	113.68	168.76	80.46	108.58	99.99
CiPaw.10G069500.v1.1	65.29	49.82	69.74	2.21	2.62	2.92	4.83	6.9	8.58	20.88	12.3	14.6	34.28	62.45	41.74	77.96	90.53	100.86	91.16	76.9	75.47	16.32	5.55	13.18	44.5	35.59	38.07	43.45	54.52	74.28	119.61	64.03	102.16	151.12	119.08	98.22
CiPaw.05G108200.v1.1	279.33	260.09	224.45	370.34	371.44	351.23	369.36	359.14	351.24	332.49	338.02	330.4	361.35	308.71	326.28	251.56	289.3	308.28	345.36	364.71	340.47	393.46	405.04	432.55	424.69	378.25	369.53	348.5	307.77	308.31	399.67	443.79	389.6	483.33	372.24	400.11
CiPaw.03G106000.v1.1	212.59	170.59	206.32	308.98	335.74	349.59	335.73	379.06	372.16	315.74	420.94	356.97	338.69	302.01	345.85	550.5	364.85	431.45	283.61	257.94	277.34	360.36	357.62	314.85	329.91	317.64	397.83	327.91	292.03	308.86	323.39	385.9	344.62	510.03	388.7	394.76
CiPaw.09G113500.v1.1	149.81	122.06	140.01	4.9	6.9	3.9	7.3	12.5	13.28	13.21	17.77	17.88	45.97	91.69	59.99	259.68	149.22	185.54	139.65	123.43	131.26	21.79	15.44	17.59	30.79	36.84	42.88	31.91	47.03	43.02	77.8	34.21	72.05	86.72	67.74	79.09
CiPaw.01G015000.v1.1	307.17	292.7	292.71	453.05	468.31	490.69	389.15	382.66	343.9	367.38	354.24	352.79	427.35	420.43	388.6	339.96	390.92	358.85	302.99	319.07	311.27	344.39	356.39	327.26	320.02	312.74	339.07	321.6	285.07	303.83	312.27	355.72	331.57	377.08	364.38	333.52
CiPaw.04G198100.v1.1	140.02	138.49	134.67	25.08	31.3	25.64	49.22	49.4	59.04	90.49	101.42	105.53	89.33	149.15	110.28	143.96	136.7	153.2	96.85	88.93	92.65	50.18	54.55	45.64	123.07	128.66	123.3	164.62	195.09	176.65	153.34	137.92	146.67	173.15	167.68	159.09
CiPaw.13G125000.v1.1	89.85	123.75	88.11	162.39	223.78	175.73	101.18	72.54	68.99	50.3	56.59	43.2	51.91	67.89	68.15	26.41	73.72	52.57	234.82	206.22	183.05	59.75	51.64	79.14	190.72	150.68	131.63	87.29	84	76.05	92.46	67.49	87.23	125.25	119.81	115.95
CiPaw.16G054300.v1.1	78.76	84.6	90.34	231.92	224.96	249.96	145.35	210.13	184.89	185.91	185.56	176.9	213.72	120.29	181.69	118.64	142.01	131.57	74.24	72.14	75.39	67.93	92.05	98.08	112.34	95.87	103.03	83.85	70.63	80.04	113.74	110.53	103.43	74.11	100.62	75.39
CiPaw.10G005800.v1.1	227.24	244.31	233.49	461.82	458.77	377.93	293.27	244.45	261.71	226.13	249.06	241.32	226.58	286.96	243.02	180.5	272.44	250.29	258.17	245.41	242.41	486.64	478.08	414.75	325.55	323.9	285.25	268.33	276.11	287.01	283.08	352.31	257.05	337.78	385.53	294.61
CiPaw.09G201300.v1.1	137.25	118.31	142.09	188.66	194.66	172.91	121.61	130.04	136.09	156.08	187.16	175.97	183.85	288.52	196	322.02	262.86	255.2	60.18	91.12	97.32	198.93	188.38	189.68	155.29	156.05	145.63	177.26	169.54	217.42	155.18	263.28	117.83	129.72	214.96	123.18
CiPaw.09G124800.v1.1	268.22	256.19	251.4	345.08	315.74	417.27	353.2	352.77	341.03	371.65	315.7	331.51	262.47	246.88	261.75	240.23	230.49	240.52	321.11	319.25	308.68	261.79	270.77	254.85	283.88	297.9	321.3	297.73	269.45	291.62	270.38	228.63	269.64	304.82	238.25	306
CiPaw.03G104300.v1.1	305.15	291.86	288.66	136.25	137.34	136.75	299.23	225.67	238.56	150.04	200.25	175.71	88.16	71.94	85.74	134.82	96.04	95.87	101.64	123.72	115.58	107.07	110.02	124.28	144.48	144.08	148.86	100.25	88.11	78.68	73.38	82.79	79.88	64.78	59.63	74.44
CiPaw.04G036500.v1.1	164.92	134.86	168.55	78.54	79.35	91.03	62.61	68.87	57.34	75.67	75.41	69.1	63.19	79.13	59.72	173.88	61.44	93.12	312.78	312.85	318.58	161.68	176.77	159.33	149.12	169.68	186.14	82.69	152.8	82.32	100.96	45.56	111.96	57.84	96.34	88.3
CiPaw.03G137000.v1.1	122.31	100.58	105.6	20.55	23.15	18.62	34.18	31.19	36.08	39.24	41.92	40.38	37.96	51.46	40.84	51.13	59.6	58.19	169.94	151.6	147.81	97.04	90.47	76.6	84.53	100.6	131.06	101.64	114.44	93.05	87.68	61.92	93.91	105.22	110.8	111.18
CiPaw.11G113300.v1.1	0.22	1.6	0.58	256.76	195.8	235.95	539.08	288.82	513.24	225.45	239.14	316.07	45.06	8.99	9.34	8.75	22.79	21.85	0.79	0	1.33	51.19	52.46	54.73	42.51	68.18	90.5	57.24	27.19	50.82	3.59	17.63	7.27	5.81	3.15	8.66
CiPaw.12G064400.v1.1	62.29	62.64	69.59	288.47	286.6	315.4	141.05	154.84	144.02	160.42	185.73	168.15	134.99	115.15	145.93	141.72	124.3	111	45.06	47.54	68.59	133.1	113.25	102.06	61.74	75.39	81.71	99.99	76.09	88.44	120.16	190.16	142.23	146.8	128.07	140.17
CiPaw.04G145300.v1.1	116.99	138.05	128.63	319.06	296.55	277.78	218.75	227.59	214.1	203.17	204.49	195.46	186.46	143.51	162.27	130.36	146.7	131.06	155.68	149.04	144.65	291.08	316.72	285.47	205.25	182.86	188.53	139.67	135.07	155.19	138.22	129.85	132.28	163.05	177.6	163.05
CiPaw.04G061900.v1.1	183.86	206.53	150.11	36.32	45.88	20.89	63.36	58.25	80.81	75.98	88.1	77.27	66.43	98.91	74.42	140.57	90.91	92.38	179.92	174.04	177.86	141.51	126.84	135.84	124.46	141.04	127.17	110.75	127.55	116.46	70.09	44.03	83.18	87.88	78.77	116.36
CiPaw.05G181100.v1.1	230.38	290.33	313.49	3.25	4.85	1.74	5.59	14.45	8.2	24.49	39.46	41.58	143.45	109.59	210.84	123.14	61.81	77.34	16.91	20.89	17.46	5.26	7.04	2.99	35.88	35.51	47.4	30.63	33.93	16.26	141	174.13	142.09	82.2	61.23	66.19
CiPaw.01G296800.v1.1	35.24	55.78	40.91	225.96	231.16	182.99	168.23	151.74	153.66	118.49	139.67	126.05	117.32	81.7	94.12	58.19	101.72	75.97	43.43	43.05	39.91	131.78	174.9	147.55	126.02	126.5	94.37	77.02	74.29	69.13	72.69	74.39	70.1	120.67	133.79	88.35
CiPaw.01G048500.v1.1	12.14	9.93	11.32	136.58	116.03	118.84	240.92	211.21	258.65	142.19	170.85	183.34	42.18	28.36	33.64	45.39	25.12	32.37	7.15	7.48	9.75	62.43	51.91	55.95	67.28	58.18	83.19	79.01	87.75	74.22	17.5	17.26	17.4	22.24	18.63	22.21
CiPaw.02G123900.v1.1	186.89	169.02	186.77	3.87	3.7	3.59	3.64	2.44	2.84	9.18	10.35	12.53	35.44	23.97	27.44	42.66	30.08	38.67	151.3	124.24	123.57	50.48	90.33	65.83	43.04	73.55	66.47	76.3	91.88	55.43	46.85	19.41	78.5	9.71	21.18	26.89
CiPaw.11G156400.v1.1	203.73	246.14	244.92	49.02	51.69	45.43	24.39	44.95	27.76	69.21	71.46	75.42	144.29	125.74	134.08	114.03	119.32	128.26	70.05	64.66	69.63	63.47	57.36	50.77	69.69	77.39	79.97	80.96	70.36	70.16	136.93	178.53	137.07	142.02	130.47	157.54
CiPaw.08G095100.v1.1	128.43	142.33	125.9	247.18	238	222.77	229.36	228.66	225.12	197.69	241.55	207.05	194.55	174.45	188.9	150.33	157.01	137.34	187.66	176.42	178.56	287.41	323.3	287.78	207.6	172.09	150.74	143.77	168.38	191.68	145.23	149.19	147.83	108.43	147.67	144.62
CiPaw.07G168100.v1.1	137.03	121.23	155.98	36.48	129.04	56.4	61.04	104.17	49.94	108.81	89.24	58.37	222.78	111.64	144.64	161	170.21	148.15	133.02	111.45	225.96	70.82	114.95	87.22	132.29	88.56	77.84	103.87	102.8	145.01	118.46	85.21	155.72	82.27	170.12	165.78
CiPaw.01G184500.v1.1	13.56	15.44	14.43	132.99	122.77	123.08	117.24	90.78	110.42	104.15	79.89	74.08	67.91	65.1	68.45	41.79	47.07	42.11	11.17	9.89	10.79	89.03	88.18	87.27	115.36	128.68	136.1	80.63	58.82	139.39	54.38	113.62	64.38	47.18	70.47	24.89
CiPaw.03G105300.v1.1	305.31	254.26	253.44	228.2	237.44	243.8	189.85	245.97	215.66	193.14	197.95	190.91	208.33	226.05	203.96	265.19	227.19	227.58	363.47	386.92	390.64	394.76	412.91	428.66	277.66	275.07	272.7	194.76	245.83	256.56	212.74	217.87	237.14	156.78	215.18	198.12
CiPaw.15G068900.v1.1	10.6	16.17	11.99	42.42	29.72	54.12	24.45	29.87	17.09	54.04	27.14	23.03	91.64	98.26	145.16	237.64	153.96	149.39	79.34	111.84	133.23	31.36	25.14	23.34	32.31	27.98	25.23	56.82	23.8	46.98	115.4	260.84	121.12	172.55	118.86	196.74
CiPaw.04G187800.v1.1	154.75	181.84	172.36	327.98	345.56	310.87	262.13	248.03	242.14	231.93	224.65	229.83	198.35	191.84	174.89	174.57	190.09	195.54	169.04	159.46	160.38	240.03	239.15	258.02	210.41	223.62	226.9	185.2	164.65	153.32	178.41	182.95	150.39	229.37	205.69	187.91
CiPaw.13G132500.v1.1	8.02	5.2	8.05	60.19	46.39	43.83	64.79	73.78	76.17	85.44	68.64	63.82	64.13	59.54	71.65	47.86	80.29	84.15	43.66	53.53	59.97	140.84	153.08	140.54	155.99	128.5	140.73	118.27	99.26	152.75	114.82	114.75	130.58	83.88	134.99	85.63
CiPaw.01G273800.v1.1	175.45	126.99	138.57	89.98	113.47	89.76	127	159.27	167.44	158.91	149.26	151.4	107.24	106.8	112.29	121.69	100.25	96.32	108.08	95.48	95	115.46	107.58	127.45	337.16	315.96	321.63	421.06	421.05	380.75	170.95	72.86	178.16	79.46	114.02	144.46
CiPaw.12G033900.v1.1	167.69	156.05	131.62	110.24	97.56	83.55	111.07	142.42	103.05	129.03	121.12	129.27	126.9	154.16	146.22	33.18	108.3	80.02	164.99	128.25	115.06	35.41	28.11	47.2	200.83	248.53	158.53	84.11	109.06	80.2	113.54	52.89	116.89	215.39	164.44	143.02
CiPaw.06G068100.v1.1	123.44	119.23	93.81	242.2	233.93	219.65	218.62	210.8	224.26	205.83	225.21	213.62	195.52	161.44	175.85	162.67	165.4	144.64	142.41	131.93	150.48	216.41	246.12	217.56	194.02	152.71	142.09	149.3	161.38	158.81	126.5	140.35	144.2	133.85	160.42	136.01
CiPaw.02G064300.v1.1	171.16	152.23	136.37	226.25	235.84	225.53	116.98	97.51	117.81	165.36	134.76	143.74	133.31	132.18	129.77	140.45	170.82	165.94	168.15	160.82	178.24	404.87	324.55	403.6	134.03	128.4	131.93	160.35	137.81	145.42	244.29	308.59	228.92	537.22	265.16	310.03
CiPaw.09G021200.v1.1	174.73	158.69	183.58	180.02	205.84	182.04	71.21	122.42	107.48	116.4	113.23	100.93	103.74	98.4	95.81	107.52	88.22	90.52	189.87	162.11	166.28	165.69	205.76	182.42	149.88	156.98	182.21	134.4	145.29	153.79	113.83	69.22	113.68	117.92	133.39	110.66
CiPaw.15G089400.v1.1	139.54	188.64	168.48	13.45	16.62	12.95	35.81	22.35	30.04	28.56	18.52	32.93	146.45	94.87	88.99	110.78	92.9	138.31	46.26	62.83	61.47	99.63	56.98	77.85	47.79	55.92	67.96	78.56	65.55	37.9	82.93	157.82	137.41	47.22	56.43	102.96
CiPaw.14G052800.v1.1	63.63	59.02	52.86	13.47	16.69	16.61	23.97	23.34	24.91	33.45	28.61	35.75	55.92	107.52	99.74	82.24	157.33	137.67	36.27	34.43	35.18	29.68	22	24.93	105.4	34.47	46.26	85.15	91.07	86.64	140.6	93.2	128.34	143.35	134.56	127.65
CiPaw.13G132600.v1.1	76.67	67.88	63.96	240.26	227.42	266.62	193.52	169.06	169.45	219.04	201.07	194.36	212.64	163.55	200.38	122.45	141.84	161	93.89	89.43	93.06	187.01	209.51	205.97	165.78	157.05	159.18	186.01	137.71	196.77	138.94	162.8	146.03	138.76	182.74	116.92
CiPaw.05G104000.v1.1	115.46	108.65	102.13	179.84	161.88	199.09	197.4	208.41	186.89	162.86	158.88	150.03	240.58	202.56	231.83	209.47	194.67	217.69	113.27	125.13	124.14	137.41	134	139.53	148.63	142.92	149.99	145.06	112.13	152.88	171.47	235.63	203.75	153.09	162.02	144.18
CiPaw.05G239100.v1.1	64.69	55.81	59.11	230.44	170.12	223.43	285.72	315.81	325.56	185.92	208.22	215.06	111.69	99.46	115.31	108.03	119.27	106.96	67.41	71.83	72.96	112.79	134.49	130.05	150.76	136.24	151.44	91.91	103.22	147.63	97.28	123.78	117.51	100.4	164.49	109.85
CiPaw.05G064200.v1.1	53.52	42.35	41.15	258.31	243.13	264.5	474.81	361.35	393.03	227.8	287.56	243.93	39.01	46.86	56.16	56.14	60.68	56.89	63.61	61.02	51.45	109.89	84.4	102.71	119.21	118.47	135.2	111.97	99.37	102.89	60.48	32.06	54.06	76.07	52.45	55.09
CiPaw.01G033600.v1.1	34.27	31.64	34.07	165.1	146.22	162.81	114.13	111.26	125.74	93.68	96.34	93.83	66.22	44.06	57.67	34.04	35.96	32.96	35.39	31.41	28.99	111.2	98.97	99.75	73.3	69.28	93.83	84.32	72.79	107.93	38.37	46.98	40.02	48.94	67.11	70.11
CiPaw.01G230300.v1.1	57.01	68.23	53.29	0.34	0.38	0.45	4.77	6.96	9.27	3.06	3.73	7.38	21.85	78.13	35.02	128.06	188.94	129.93	125.97	80.72	111.91	50.27	25.2	34.08	40.01	26.79	20.77	34.65	21.56	18.8	52.33	159.37	48.31	185.31	69.13	115.88
CiPaw.01G304200.v1.1	1.87	1.17	1.56	12.58	13.28	13.36	17.12	11.76	9.63	19.63	25.6	32.74	51.7	67.75	68.43	59.93	96.92	57.67	3.98	1.7	2.49	54.44	18.94	23.28	54.59	40.57	47.34	94.63	75.95	99.81	122.4	62.73	95.93	90.17	112.08	63.66
CiPaw.01G271300.v1.1	60.17	46.17	39.49	55.17	75.6	67.34	48.53	48.65	44.61	79.45	47.84	33.23	36.94	88	65.06	76.32	142.71	137.74	56.09	52.14	58.2	252.65	171.64	248.17	104.89	60.09	70.82	114.09	114.61	136.55	174.63	305.01	147.31	340.38	285.29	232.15
CiPaw.01G305300.v1.1	201.88	226.96	226.8	284.08	299.17	278.58	245.99	228.54	228.41	233.05	211.67	220.58	199.86	260.47	218.95	170.85	238.38	234.5	239.47	224.95	220.09	283.23	290.56	307.83	353.07	391.53	351.64	317.17	284.99	308.15	280.3	286.06	249.92	340.54	301.13	268.01
CiPaw.05G024700.v1.1	5.45	3.05	4.28	136.27	136.65	123.78	97.88	128.84	126.17	115.23	82.74	85.47	42.16	28.78	35.21	31.04	39.68	33.47	4.48	3.04	3.27	63.57	71.09	92.29	69.87	77.79	110.94	90.06	61.86	120.12	39.55	31.18	45.77	42.62	62.22	48.52
CiPaw.03G155300.v1.1	194.37	244.99	187.12	32.68	44.46	28.61	71.34	44.49	47.92	51	65.33	46.7	37.63	56.62	49.02	43.53	79.82	65.09	283.01	277.32	223.95	72.94	81.34	81.3	103.02	90.25	88.3	99.62	102.65	83.35	92.68	55.01	76.25	163.17	120.05	128.02
CiPaw.03G010400.v1.1	153.15	132.13	152.63	38.28	35.85	26.82	62.96	87.92	112.86	93.57	89.03	114.55	90.42	104.21	86.41	107.83	79.34	83.01	79.57	64.38	58.4	80.52	81.6	92.01	254.13	260.7	253.79	326.32	431.17	313.4	154.25	47.78	159.91	46.19	83.07	157.92
CiPaw.03G119200.v1.1	77.59	67.72	77.1	7.3	3.25	5.75	4.85	5.09	3.12	3.1	6.96	11.3	14.22	77.88	36.06	205.38	54.46	90.52	312.42	568.08	720.31	17.43	25.66	44.37	17.28	28.62	15.25	26.79	41.15	25.53	137.25	354.15	110.3	34.95	106	96.89
CiPaw.09G055800.v1.1	127.03	117.06	137.73	51.14	53.29	42.12	85.27	115.5	139.87	124.74	102.91	131.87	118.28	133.39	134.24	150.57	149.59	146.3	70.56	67.01	70.25	70.5	81.01	95.06	149.73	148.53	148.3	152.82	132.44	202.01	94.91	66.33	100.91	88.79	101.75	80.76
CiPaw.05G199000.v1.1	56.2	66.5	71.3	105.16	115.05	137.73	106.12	156.3	138.05	142.29	104.93	128.33	109.58	128.9	132.6	77.4	84.92	78.89	62.44	55.99	55.67	77.27	75.44	92.42	224.57	163.19	212.72	157.46	162.7	189.73	142.22	72.87	119.17	88.44	126.47	91.89
CiPaw.06G035500.v1.1	88.35	66.02	83.29	160.51	203.78	188.28	308.35	249.86	302.6	165.74	207.49	189.89	67.89	142.72	113.48	177.65	144.6	150.06	114.97	115.19	104.72	163.01	131.76	138.21	144.74	164.51	127.3	169.46	213.31	209.8	134.36	188.55	135.02	175.81	163.47	142.33
CiPaw.13G127100.v1.1	121.09	102.92	115.34	11.33	13.66	7.78	15.22	14.41	12.43	18.34	15.13	14.47	18.03	36.97	23.55	42.45	47.55	54.47	107.76	104.29	102.31	59.81	48.08	43.65	31.46	36.06	31.44	43.28	54.82	56.78	92.45	145.48	86.02	175.23	73.59	106.87
CiPaw.08G086300.v1.1	3.27	3.46	3.59	41.53	50.39	26.14	147.92	65.13	131.51	116.27	55.96	112.1	134.38	36.41	96.18	17.76	50.46	40.18	0.66	0.71	0.93	35.04	24.61	62.27	82.12	83.74	76.54	141.75	79.56	78.18	75.18	38.67	92.45	29.13	21.4	17.35
CiPaw.04G054300.v1.1	157.73	178.41	140.06	40.5	55	43.6	94	70.82	75.88	57.29	56.92	68.2	70.9	130.06	96.06	81.24	113.7	111.37	152.4	128.81	101.44	56.22	33.1	59.94	124.68	73.78	89.36	83.62	87.2	88.64	154.06	126.96	140.8	142.68	81.52	106.45
CiPaw.02G133800.v1.1	242.32	227.78	231.75	156.21	187.46	163.44	195.4	212.8	210.51	275.21	280.62	271.26	216.92	227.73	213.42	304.32	202.06	227.39	308.19	294.09	306.77	262.27	261.85	244.11	252.79	242.29	278.16	287.5	323.52	309.01	214.86	175.83	231.14	238.68	239.7	275.63
CiPaw.07G208400.v1.1	14.37	21.96	19.17	120.03	91.22	94.67	126.05	101.84	118.71	104.53	115.18	120.33	93.03	47.78	62.07	30.52	58.64	31.85	13.46	11.67	11.35	64.89	57.73	53.11	80.51	88.26	105.15	117.02	80.03	81.82	51.27	66.55	55.96	42.33	42.43	43.04
CiPaw.14G133600.v1.1	117.46	109.1	124.2	28.21	27.98	16.5	17.19	17.37	22.14	27.37	26.86	26.53	50.84	88.63	85.24	93.06	124.52	106.89	68.12	62.54	66.13	26.94	14.98	25.35	36.66	32.27	28.28	36.97	52.9	49.47	103.07	82.87	109.15	103.41	137.28	111.42
CiPaw.15G182700.v1.1	141.98	122.65	137.4	15.45	23.42	26.14	33.5	36.8	34.85	36.41	45.99	34.57	92.02	108.56	116.59	152.7	71.77	110.52	90.01	77.87	75.69	63.63	58.92	53.32	77.12	70.49	82.02	96.73	111.18	96.51	116.16	131.69	126.62	113.27	143.42	100.51
CiPaw.09G087400.v1.1	37.48	33.9	35.24	127.54	151.34	139.4	207.71	159.3	174.03	101.73	109.42	121.44	77.31	153.77	100.49	170.35	117.15	107.81	68.47	69.44	79.11	70.32	46.27	63.47	161.66	116.62	87.14	113.68	103.34	145.66	92.87	95.96	74.06	69.47	85.53	120.34
CiPaw.05G191500.v1.1	126.73	116.38	102.02	65.22	77.25	72.83	85.03	60	59.64	59.17	80.27	73.78	90.86	144.87	119.62	36.5	101.78	93.45	173.3	147.74	115.2	56.63	50.89	67.05	137.43	158.11	97.62	133.51	138.87	111.98	114.14	73.03	120.97	221.11	169.6	237.96
CiPaw.02G071900.v1.1	185.7	185.88	162.81	103.31	119.44	100.25	116.68	95.73	108.02	99.47	82.87	108.15	113.69	187.64	129.38	140.38	153.71	156.96	197.04	217.63	210.92	212.42	196.52	214.72	208.83	185.99	164.79	157.82	164.24	193.14	177.26	151.96	184.66	169.54	192.73	179.05
CiPaw.04G109100.v1.1	206.26	220.13	212.15	50.88	48.46	42.48	53.14	56.27	52.88	76.19	83.84	91.74	136.44	117.25	153.21	109.35	95.93	101.03	49.55	48.66	57.42	70.41	51.76	50.86	68.72	85.15	84.83	101.29	94.06	76.57	130.29	152.51	161.42	102.98	82.37	106.17
CiPaw.01G026200.v1.1	57.9	56.94	56.48	32.72	41.83	32.82	22.59	31.83	31.4	27.3	32.05	28.66	38.61	64.64	41.6	55.64	55.29	47.05	99.71	114.97	117.36	96.99	98.59	79.62	67.96	101.64	91.63	105.62	125.49	114.54	63.93	66.72	84.35	70.25	103.61	93.37
CiPaw.05G012400.v1.1	0.31	1.37	0.75	109.89	31.95	276.06	120.28	153.38	105.82	163.81	77.63	82.89	160.9	88.64	133.1	12	24.48	26.73	0.62	0.1	0.71	11.21	30.96	9.92	43.84	32.54	57.97	56.3	15.76	42.31	56.65	130.51	35.89	27.16	35.95	21.9
CiPaw.11G035200.v1.1	65.76	77.96	78.47	3.36	3.24	4.12	2.71	3.17	1.8	7.99	5.35	5.25	43.52	94.04	68.56	70.38	53.19	65.39	77.06	82.28	155.27	20.37	11.65	11.32	8.64	13.26	14.88	27.3	22.92	17.39	45.79	68.3	74.35	47.88	52.59	78.35
CiPaw.05G104800.v1.1	119.83	96.67	117.28	166.95	168.39	197.36	40.47	47.49	51.19	121.61	88.13	104.52	172.94	165.7	149.3	202.1	154.22	151.46	147.77	116.28	133.48	242.8	223.71	223.49	79.36	117.89	102.68	99.51	100.76	157.22	146.28	134.13	143.82	114.82	129.86	135.34
CiPaw.05G071000.v1.1	7.8	5.43	6.72	317.28	221.33	256.31	138.84	206.21	184.64	243.1	231.37	194.34	68.05	46.07	58.38	12.18	33.64	31.27	1.23	1.64	1.81	49.48	70.85	79.6	38.42	34.11	50.18	47.91	28.84	65.04	16.37	28.29	14.95	11.95	22.75	9.39
CiPaw.10G167100.v1.1	182.14	185.94	164.38	350.7	378.18	285.29	205.43	200.28	198.25	218.32	214.65	195.63	202.06	216.39	194.99	185.17	203.83	206.62	210.51	217.28	226.3	416.23	454.77	394.24	272.21	271.56	267.37	255.09	265.87	272.42	234.68	273.66	225.43	243.26	265.39	225.44
CiPaw.11G136400.v1.1	90.98	87.94	85.66	190.72	177.36	218.33	176.95	209.17	172.45	190.39	182.21	202.43	194.66	248.33	220.51	180.6	207.81	197.85	87.95	82.49	84.5	150.38	128.81	145.45	229.83	158.24	172.18	219.6	246.65	256.67	211.85	226.39	199.54	166.71	227.02	178.3
CiPaw.02G002700.v1.1	227.8	238.44	201.64	453.09	419.03	406.47	330.93	347.3	320.5	381.3	403.11	353.06	306.06	234.85	270.96	236.64	262.71	238.12	246.79	246.51	242.58	432.29	450.87	398.88	285.18	241.51	251.37	232.57	225.25	250.73	203.34	207.7	211.49	241.73	248.76	235.75
CiPaw.04G053500.v1.1	189.3	188.07	162.57	15.96	19.63	12.78	41.4	43.92	34.03	53.78	55.16	57.38	62.68	90.89	54.5	72.69	101	94.59	105.51	110.88	121.66	67.96	49.5	43.24	112.26	158.87	113.61	152.21	138.23	133.74	73.97	79.38	80.93	87.25	117.31	96.89
CiPaw.04G061300.v1.1	87.27	120.21	110.41	9.02	8.69	8.91	18.67	24.3	14.31	19.61	15.24	28.73	86.71	109.89	110	66.03	153.78	58.45	7.77	36.43	27.28	23.42	19.17	19.37	37.19	56.6	56.96	68.46	25.79	27.41	135.9	136.52	117.43	143	63.07	122.56
CiPaw.16G040000.v1.1	94.4	102.35	94.77	74.37	100.76	66.64	150.09	145.59	144.13	110.58	80.1	134.95	79.08	75.37	80.72	35.97	104.21	84.15	215.84	197.6	169.71	43.16	65.71	103.14	265.62	221.67	256.17	115.44	110.66	100.33	112.51	128.7	105.79	147.98	138.97	138.94
CiPaw.10G007100.v1.1	85.21	85.98	88.53	143.09	144.84	141.27	93.45	81.97	90.58	82.43	78.58	71.77	143.3	177.82	171.41	196.43	181.95	144.91	109.54	120.43	146.11	118.64	120.75	120.1	83.5	78.94	73.72	72.87	75.27	88.53	165.2	205.82	106.2	136.68	130.49	102.69
CiPaw.14G098600.v1.1	42.71	55.58	41.45	6.38	9.9	6.59	6.41	9.89	5.44	14.24	14.91	16.51	100.33	93.54	101.26	52.24	65.53	52.75	2.4	3.4	3.39	17.39	21.52	10.14	67.29	64.06	89.46	51.09	47.84	25.17	94.39	106.69	101.95	43.13	33.33	106.97
CiPaw.05G144900.v1.1	269.66	283.88	277.49	23.52	27.97	15.89	80.98	87.21	89.56	135.15	110.68	145.73	234.01	145.89	195.37	141.32	113.57	117.25	37.37	42.41	36.57	33.92	36.93	29.76	131.94	130.96	135.76	133.86	136.92	107.23	163.79	146.94	174.07	93.77	99.92	117.45
CiPaw.07G166000.v1.1	192.23	196.29	193.03	115.37	124.83	110.33	122.36	134.37	144.08	113.44	116.94	122.8	117.06	167.23	140.9	171.8	194.93	182.47	248.8	218.4	215.7	141.3	112.42	122.67	98.92	75.94	55	165.61	219.71	180.83	111.9	164.28	113.24	154.61	189.12	228.76
CiPaw.03G167800.v1.1	189.54	170.34	147.81	7.23	10.49	5.64	16.26	15.85	21.54	28.49	33.77	33.26	44.42	89.68	66.39	70.81	79.5	84.05	183.08	176.72	171.25	88.73	65.29	58.11	60.77	59.61	54.31	75.89	103.42	91.11	101.71	45.91	97.94	105.5	102.94	106.83
CiPaw.08G027600.v1.1	20.6	28.73	24.01	121.15	96.76	87.21	157.47	91.87	117.45	85.02	111.56	110.06	68.75	57.84	45.13	23.23	34.09	33.62	40.84	38.52	41.21	115.93	93.06	71.68	100.79	89.45	118.21	83.9	91.2	90.96	61.37	71.1	78.24	35.04	45.15	45.64
CiPaw.13G041900.v1.1	155.4	146.48	186.66	129.12	140.94	138.11	117.79	179.55	149.4	339.92	320.97	326.9	201.35	195.75	161.68	240	113.5	183.73	193.89	168.22	187.29	163.32	177.36	140.32	162.96	207.39	252.33	240.35	180.99	227.27	111.92	95.32	93.64	136.18	104.43	115.39
CiPaw.06G080500.v1.1	54	57.38	54.27	128.95	111.37	138.22	131.01	141.17	135.75	115.19	129.08	137.46	134.28	87.83	121.49	86.97	71.26	79.38	36.56	33.64	34.49	45.15	46.81	47.14	76.61	65.13	78.83	104.02	109.07	106.67	69.2	68.82	75.24	53.69	61.11	58.44
CiPaw.12G030300.v1.1	98.92	91.57	83.11	231.23	218.37	227.71	192.77	185.55	188.58	245.19	235.59	224.72	171.59	139.12	143.89	140.67	126.03	137.82	121.09	128.48	131.47	242.64	258.65	232.12	154.06	150.07	166.98	168.15	149.06	184.48	121.95	131.33	120.46	152.34	145.25	148.5
CiPaw.01G228700.v1.1	0	0	0	116.64	106.36	121.78	108.31	141.03	99.19	80.69	78.48	55.36	38.37	17.33	48.28	42.62	7.07	22.39	0	0	0	40.65	27.72	42.36	56.62	38.13	41.98	47.66	25.5	70.81	11.56	7.34	19.47	13.29	41.05	8.08
CiPaw.03G139200.v1.1	195.7	167.6	131.69	21.14	23.04	13.66	12.42	14.36	18.31	11.47	25.35	17.39	11.25	96.81	16.16	10.74	50.43	75.6	149.28	84.43	91.92	68.27	42.14	61.47	35.62	34.32	35.63	43.27	51.71	25.24	46.48	83.25	58.33	115.83	173.82	110.8
CiPaw.08G048900.v1.1	118.37	111.4	101.31	124.07	139.6	126.84	142.56	121.17	140.12	99.48	98.27	104.03	132.77	197.2	164.12	152.3	163.27	137.38	186.77	184.91	168.46	131.24	141.58	152.56	210.05	198.4	168.66	148.76	173.3	183.2	230.11	247.29	189.15	158.96	192.91	185.99
CiPaw.05G228000.v1.1	34.85	27.08	17.51	151.18	149.5	189.52	201.61	234.94	182.9	164.39	170.26	155.53	84.95	107.19	130.71	83.27	66.45	80.1	23.86	18	32.37	89.14	68.77	66.73	96.68	73.66	94.81	106.35	83.46	121.04	75.19	55.21	91	54.14	72.24	60.25
CiPaw.08G143800.v1.1	57.73	52.03	49.68	227.19	201.4	115.01	84.03	81.08	107.8	69.93	61.13	68.18	112.44	56.77	89.65	109.09	210.88	101.73	6.32	7.13	7.56	41.81	25.01	44.28	19.54	25.74	17.77	30.19	17.73	25.16	22.89	37.68	19.32	43.44	58.68	65.8
CiPaw.01G262900.v1.1	153.75	174.15	166.15	324.82	314.28	292.64	258.31	265.02	262.9	264.8	303.04	268.71	218.52	182.2	204.86	129.92	169.93	155	187.53	173.42	169.71	246.54	280.46	266.12	214.6	173.97	162.81	158.92	158.65	184.01	151.93	182.41	153.68	143.5	173.68	145.01
CiPaw.02G198700.v1.1	147	141.93	131.85	318.36	322.79	272.35	264.8	233.02	242.51	232.08	245.65	224.33	188.54	173.04	183.14	150.59	180.84	163.29	168.5	165.13	175.15	293.56	293.81	269.85	210.29	194.05	196.9	203.43	169.57	175.44	151.94	160.32	165.48	215.61	198.01	175.14
CiPaw.07G137800.v1.1	12.39	10.79	11.54	344.97	249.2	317.72	217.51	174.94	169.26	157.34	223.22	190.34	111.23	35.01	62.64	19.2	26.07	28.21	10.56	11.32	9.76	78.13	62.65	73.24	56.69	46.16	54.8	46.84	43.16	57.1	46.39	84.2	39.86	30.85	36.91	24.42
CiPaw.09G034500.v1.1	69.83	119.57	96.41	48.5	50.52	31.7	32.22	24.82	23.46	21.11	18.28	19.32	183.69	146.62	143.34	160.3	160.55	123.9	63.55	70.17	65.43	34.81	34.93	40.85	32.37	33.88	30.39	42.37	31.39	23.46	110.39	187.99	148.67	75.31	68.99	149.75
CiPaw.08G125700.v1.1	115.53	140.98	125.72	92.42	84.86	100.9	85.66	106.25	85.58	132.58	127.32	116.94	233.32	147.3	168.87	146.33	150.15	157.54	33.65	36.07	42.5	59.94	62.66	45.26	83.19	88.25	78.29	137	92.54	80.22	116.41	200.93	130.01	119.54	114.53	119.81
CiPaw.02G008300.v1.1	252.98	211.04	220.88	6.2	10.21	6.49	9.93	10.84	10.44	19.43	13.37	12.9	22.48	43.45	29.88	77.01	43.82	45.57	169.71	175.39	167.37	50.75	46.22	40.16	46.28	45.42	49.31	74.45	87.51	77.38	71.14	52.33	80.84	58.9	94.51	54.36
CiPaw.03G168900.v1.1	27.01	22.8	27.01	99.28	108.69	84.41	448.82	271.27	551.21	124.85	210.73	213.62	6.38	0.96	3.86	18.51	34.99	30.66	36.17	54.05	55.49	121.36	96.2	113.48	40.52	51.6	59.22	23.51	51.45	29.08	6.81	7.82	8.62	9.28	12.08	20.96
CiPaw.05G125800.v1.1	219.34	211.05	182.79	202.42	206.39	195.36	153.82	119.31	138.13	117.76	106.31	129.14	127.32	177.85	148.71	127.59	172.02	186.36	194.91	197.4	198.61	158.88	150.03	151.6	130.84	143.59	119.79	112.93	112.15	105.57	174.58	172.23	172.13	232.45	180.86	156.31
CiPaw.15G043400.v1.1	88.58	64.28	82.08	16.08	48.47	25.67	23.38	12.55	21.54	18.15	27.78	21.87	48.84	129.01	101.79	117.2	145.18	178.18	54.16	57.99	57.47	64.98	42.2	41.16	27.73	57.35	56.92	38.32	50.38	36.6	89.34	63.33	97.69	113.98	99.11	67.9
CiPaw.15G065800.v1.1	274.15	238.91	254.77	233.39	290.04	266.81	199.24	248.99	235.22	191.71	190.34	198.14	213.27	231.4	207.02	251.05	132.75	155.89	239.81	234.09	225.79	313.05	277.89	296.11	205.39	212.16	199.07	211.83	289.01	231.77	169.45	115.73	179.02	93.47	115.85	137.22
CiPaw.01G052900.v1.1	39.33	33.6	31.74	83.01	49.87	64.82	64.09	98.87	87.76	87.01	90.75	89.52	46.27	11.97	36.67	26.68	39.94	42.43	141.16	133.16	121.4	113.37	116.89	128.01	125.73	129.72	126.63	72.24	63.72	65.26	27.02	24.08	37.67	36.96	25.08	26.74
CiPaw.07G156000.v1.1	118.2	111.61	105.86	8.56	8.7	5.18	12.91	9.35	10.99	11.83	13.59	18.65	27.89	62.13	39.92	50.89	67.44	71.35	127.92	123.92	117.99	15.56	13.44	13.28	43.68	41.65	35.32	39.08	58.87	40.7	86.4	55.71	63.99	81.71	87.06	117.41
CiPaw.09G010400.v1.1	207.16	217.21	213.03	370.04	361.34	421.62	276.31	321.16	286.32	284.34	254.78	258.16	242.97	225.55	243.63	245.21	223.61	231.93	198.79	197.31	211.62	313.41	294.43	314.26	282.19	266.91	296.4	247.06	264.23	284.12	257.85	255.12	232.13	230.23	253.24	246.32
CiPaw.07G188400.v1.1	212.04	184.9	199.36	276.14	288.57	285.48	281.14	284.8	277.35	247.8	248.11	253.78	221.24	209.52	226.99	163.48	212.57	199.67	232.62	219.37	208.68	297.63	302.25	281.96	239.48	258.36	218.07	197.94	192.2	218.63	169.28	189.56	187.31	157.65	216.45	183.5
CiPaw.12G043700.v1.1	194.23	220.14	158.4	334.52	323.49	314.99	271.21	239.82	225.61	183.37	252.21	207.89	237.44	272.46	262.78	233.43	262.5	238.5	228.29	239.01	245.3	320.57	319.28	299.47	296.91	211.77	173.35	165.65	204.77	219.24	269.04	276.25	247.42	193.96	264.42	256.05
CiPaw.12G042100.v1.1	152.81	161.92	153.24	284.94	268.89	249.29	227.66	228.7	222.52	207.11	247.13	227.37	217	198.88	200.18	184.51	195.71	186.38	165.38	155	163.5	235.01	239.72	229.39	197.83	190.25	174.49	158.47	160.85	169.68	155.44	178.09	137.86	170.49	177.12	150.51
CiPaw.09G025500.v1.1	94.47	104.73	102.56	213.56	225.12	188.81	186.01	176.93	182.13	136.16	169.09	163.86	137.56	137.16	140.52	105.68	126.35	113.48	107.68	101.3	95.22	183.87	192.25	169.53	166.36	151.11	136.57	122.93	124.49	121.82	112.68	121.47	102.31	121.87	135.65	117.93
CiPaw.02G103400.v1.1	117.3	112.53	111.39	173.28	120.68	162.76	90.94	126.9	107.23	144.34	116.09	119.01	152.38	125.19	124.96	245.5	232.22	211.7	224.28	221.4	260.9	169.07	165.69	177.19	98.86	119.73	124.96	132.93	104.73	117.91	147.49	259.87	158.42	250.71	215.48	220.36
CiPaw.01G018400.v1.1	230.79	206.52	237.56	100.98	109.98	114.73	163.3	145.27	136.2	145.95	138.16	109.55	163.99	173.03	173.11	334.26	219.55	271.41	185.16	198.61	202.56	103.99	138.74	150.93	166.16	175.39	194.25	145.08	145.92	137.71	194.49	241.94	189.76	264.4	196.88	169.73
CiPaw.03G116900.v1.1	139.05	155	142.76	150.07	144.59	142.06	139.3	89.26	131.39	106.24	142.93	141.83	273.41	227.07	321.87	417.9	189.76	208.63	63.83	94.11	151.31	290.35	222.27	180.18	134.98	162.09	170.52	238.56	226.01	182.36	245.22	355.47	355.49	157.87	150.65	256.06
CiPaw.10G137000.v1.1	190.11	186.86	194.65	215.47	227.82	262.06	276.72	291.61	272.11	250.14	235.94	258.84	246.02	245.07	254.64	213.5	223.36	198.48	219.73	201.04	209.71	179.31	212.3	212.72	255.75	246.62	269.09	173.41	171.3	192.74	188.03	209.51	166	179.74	191.1	167.7
CiPaw.07G054000.v1.1	57.35	57.32	61.65	162.51	134.24	173.1	179.13	189.81	166.27	144.8	132.93	151.95	191.47	116.51	177.04	108.51	116.88	94.41	36.42	45.24	43.59	77.05	80.5	79.43	84.7	74.97	66.64	87.27	90.51	84.07	119.83	134.93	95.46	77.99	71.01	71.94
CiPaw.03G002500.v1.1	47.89	46.21	63.56	6.57	14.35	13.7	76.29	165.71	136.17	92.49	96.08	52.58	47.19	18.16	47.56	63.17	35.59	34.23	15.9	14.02	17.99	66.28	49.27	70.78	84.19	65.28	88.24	78.36	58.68	109.8	22.05	9.56	28.17	2.98	16.87	19.71
CiPaw.09G148700.v1.1	1.2	1.43	1.84	177.02	184.82	153.78	64.55	82.14	70	80.14	57.78	46.17	53.42	27.54	43.03	49.74	29.76	19.17	2.29	5.55	15.9	127.95	125.04	146.41	75.65	76.05	113.23	108.06	50.77	113.05	34.99	104.01	38.68	45.67	29.24	36.32
CiPaw.09G073100.v1.1	15.81	10.13	10.07	40.76	29.52	46.15	24.35	52.2	26.3	101.14	125.03	133.75	287.1	150.19	275.07	103.52	72.17	67.54	5.79	7.96	5.78	39.45	64.15	39.76	36.42	79.43	73.95	72.69	38.68	49.91	96.12	156.18	91.78	75.61	42.95	61.62
CiPaw.07G202700.v1.1	1.88	1.37	1.39	0.79	1.18	1.14	4.81	4.19	4.75	6.68	18.72	9.67	34.15	61.36	36.59	141.95	65.51	89.54	64.54	64.88	74.83	31.49	14.84	34.24	65.69	24.63	38.65	43.53	38.1	40.22	56.26	25.42	53.78	75.38	122.63	44.03
CiPaw.13G120000.v1.1	124.57	114.14	117.99	54.63	56.31	54.04	49.34	77.67	70.81	83.9	83.95	89.9	129.11	140.69	112.15	167.03	130.43	146.4	110.75	94.22	129.69	61.05	46.15	51.29	81.86	85.85	70.85	88.44	74.26	95.8	121.85	60.6	130.36	46.03	55.62	95.66
CiPaw.06G122400.v1.1	84.28	71.25	70.54	9.28	10.77	7.59	20.87	21.04	23.48	25.34	25.33	30.01	60.82	97.7	66.41	77.44	95.18	96.14	84.77	74.6	80.89	17.7	15.1	16.33	39.34	45.73	38.27	35.08	45.81	36.86	86.61	87.36	75.18	76.64	90.07	102.59
CiPaw.07G018600.v1.1	120.09	117.4	122.12	27.27	30.4	31.66	40.13	54.84	43.75	55.29	41.49	48.18	73.52	110.58	88.84	103.78	108.32	105.07	62.81	64.06	71.96	47.18	45.18	37.16	51.4	61.51	56.98	87.3	81.19	101.54	93.95	150.93	91.67	108.35	118.33	114.15
CiPaw.06G131500.v1.1	317.61	305.38	278.44	264.79	301.7	292.86	195.22	212.88	216.19	219.84	211.12	211.16	233.25	276.16	272.81	285.95	339.28	310.49	308.37	288.35	286.79	307.01	273.55	326.17	256.69	242.97	229.58	250.75	280.36	262.91	286.71	257.32	269.1	369.72	416.18	319.43
CiPaw.09G190200.v1.1	2.75	4.59	4.15	120.06	80.31	152.74	95.99	132.01	70.24	167.69	94.73	103.61	292.8	118.94	219.62	89.68	64.39	68.17	0.88	0.97	2.2	34.9	44.15	35.61	54.62	52.53	62.73	111.28	69.69	72.54	75.61	101.88	95.41	54.54	67.82	78.6
CiPaw.05G111800.v1.1	15.63	21.74	22.76	323.99	207.45	325.53	489.25	355.69	311.21	277.63	333.61	252.41	298.08	78.08	150.31	61.86	68.92	71.98	36.74	48.49	72.61	82.64	92.52	118.96	76.76	76.82	71.56	104.96	90.98	118.93	107.25	222.01	86.6	91.36	95.98	103.97
CiPaw.01G153900.v1.1	141.17	141.82	129.68	13.08	18.84	6.76	15.37	23.15	15.15	37.65	40.03	27.58	66.8	82.29	76.73	60.81	79.85	74.85	127.39	120.52	95.23	41.61	45.71	47.23	91.4	101.59	70.21	77.51	101.46	86.34	92.38	51.76	78.55	104.91	79.48	129.11
CiPaw.09G056100.v1.1	138.88	135.01	139.31	42.29	43.75	39.68	66.66	72.17	87.11	69.34	75.3	85.11	102.85	135.38	128.95	132.98	145.74	157.56	112.27	101.34	98.41	78.4	88.49	86.18	143.97	154.26	127.76	136.24	168.44	140.48	102.93	80.21	98.29	84.35	108.09	129.76
CiPaw.04G192200.v1.1	72.33	61.59	77.9	55.34	68.79	42.51	92.3	160.11	145.14	101.34	91.57	112.97	93.61	51.72	104.07	93.65	74.58	63.86	35.5	38.61	28.26	52.92	34.42	76.94	202.21	160.02	185.54	200.85	185.58	237.41	101.72	36.93	98.72	44.1	82.64	86.89
CiPaw.02G184100.v1.1	94.29	110.76	109.77	54.93	49.29	52.33	66.23	41.1	67.94	44.81	39.44	73.36	154.65	145.11	161.61	89.32	103.7	104.65	9.71	9.08	13.35	33.89	28.2	28.12	33.35	32.48	37.4	35.85	36.56	15.84	99.05	116.07	133.79	58.96	68.2	86.42
CiPaw.03G158200.v1.1	245.9	253.02	231.4	218	265.03	212.87	219.24	242.62	230.13	187.41	195.95	197.7	251.13	284.19	260.34	229.32	270.66	240.18	381.46	353.03	326.26	315.27	348.85	359.17	334.39	337.42	291.65	269.9	287.62	282.87	297.13	239.62	282.77	244.78	280.88	292.87
CiPaw.11G042300.v1.1	44.65	43.05	42.51	152.3	124.39	151.94	217.15	147.31	208.68	144.47	141.57	167.86	83.47	93.25	103.21	65.57	75.81	63.76	31.62	37.66	40.81	89.74	97.72	91.82	121.25	130.51	173.23	112.2	87.58	110.86	96.2	85.73	90.92	92.47	77.89	86.14
CiPaw.08G069600.v1.1	59	54.12	52.47	27.95	24.39	25.77	67.37	112.01	97.81	103.87	99	96	60.1	49.11	57.42	57.94	45.94	48.62	32.86	25.42	27.22	43.89	44.35	56.82	202.62	171.16	192.14	231.14	267.62	241.68	72.18	22.53	85.42	25.01	46.24	84.79
CiPaw.07G080700.v1.1	259.36	257.83	244.38	239.62	249.66	270.16	262.59	349.46	297.05	232.21	215.78	205.44	232.1	218.49	218.76	214.33	234.29	191.79	251.42	288.91	295.71	243.05	215.76	256.37	183.35	193.47	197.46	181.89	174.59	188.08	203.29	166.63	165.63	203.38	186.83	209.53
CiPaw.15G120000.v1.1	60.74	60.9	61.59	61.53	74.02	45.4	55.2	59.11	62.14	76.5	81.04	71.79	91.56	131.96	101.67	95.15	128.48	103.57	30.47	23.32	22.45	33.31	20.88	24.1	19.44	21.44	8.15	81.91	79.43	98.29	42.78	90.68	60.88	76.33	113.39	137.27
CiPaw.10G136100.v1.1	152.03	190.25	150.25	225.95	241.89	246.79	232.79	237.67	234.02	195.01	213.36	204.34	192.21	195.1	176.02	137.06	186.27	169.41	189.51	182.75	175.49	208.94	248.6	261.21	208.04	203.87	159.11	119.63	159.33	149.96	133.68	186.1	142.36	117.45	167.84	140.91
CiPaw.16G026900.v1.1	152.15	153.51	155.15	237.63	236.78	231.19	212.26	232.59	228.27	210.63	217.91	224.66	181.73	202.4	183.25	190.15	180.58	184.31	150.65	149.5	157.85	249.81	250.69	225.07	220.61	215.17	229.21	192.6	204.12	227.25	164.09	158.66	180.64	149.57	184.29	173.65
CiPaw.13G021300.v1.1	114.24	112.11	118.94	54.83	60.61	44.69	46.48	45.24	48.24	49.63	55.93	54.13	60.42	90.78	75.84	89.22	118.44	98.77	133.45	129.2	142.67	78.75	85.13	70.1	72.74	81.6	64.37	68.34	78.28	84.89	120.35	137.19	105.99	140.08	126.03	121.29
CiPaw.13G174400.v1.1	164.12	137.02	150.85	87.57	89.13	100.58	69.15	77.87	76.55	85.29	69.08	69.69	78.97	111.08	93.64	135.63	151.25	139.59	191.17	177.89	197.4	117.19	125.33	130.04	120.37	120.98	110.74	112.41	123.02	127.83	165.11	108.72	122.37	133.97	165.73	161.66
CiPaw.16G034400.v1.1	213.27	185.56	191.42	200.42	212.05	197.45	268.04	273.67	280.16	252.91	259.39	252.3	175.6	225.87	201.96	301.15	278.06	298.49	274.74	275.58	268.47	241.42	223.06	249.44	286.88	305.36	287.61	262.5	248.76	257.09	208.87	209.86	202.03	257.3	244.3	208.49
CiPaw.15G147400.v1.1	167.62	125.96	132.45	28.64	44.08	29.76	46.57	68.56	69.21	63.68	77.91	69.4	43.96	90.84	78.56	297.29	208.78	201.04	120.57	106.05	112.12	237.38	141.75	142.37	94.68	167.2	142.5	73.54	73.83	83.6	75.88	78.9	98.01	82.47	94.8	195.48
CiPaw.16G045300.v1.1	79.33	70.48	85.54	29.68	80.55	51.93	7.82	8.94	12.49	2.95	4.07	4.32	7.69	5.22	8.5	15.18	7.96	14.61	253.04	213.26	207.42	336.51	241.29	179.84	27.53	43.22	44.24	38.69	121.38	25.95	33.03	16.34	50.21	33.96	39.63	121.91
CiPaw.11G049700.v1.1	107.78	98.77	108.83	42.23	49.18	43.42	38.98	50.9	44.98	47.3	43.91	50.86	51.98	84.8	65.72	95.78	100.6	97.68	138.74	122.14	125.82	64.55	66.7	67.72	70.63	62.78	62.55	76.52	99.34	93.76	122.48	120.15	102.76	120.87	142.39	138.78
CiPaw.15G001300.v1.1	141.24	127.25	113.75	17.84	22.53	14.24	40.5	39.04	43.47	59.26	51.31	55.24	79.52	102.79	87.56	111.65	94.76	113.79	270.29	258.34	256.25	53.11	51.54	50.41	91.17	81.3	85.69	75.68	106.25	85.34	84.78	43.1	85.42	85.97	85.69	99.54
CiPaw.01G158800.v1.1	100.33	95.76	91.06	185.81	242.13	171.71	144.68	117.64	155.77	75.15	68.45	83.97	135.09	133.91	133.11	105.57	114.24	107.47	154.81	158.24	160.51	275.79	282.31	339.81	176.62	171.37	181.38	151.37	164.06	150.95	202.08	208.7	201.89	140.82	166.39	160.62
CiPaw.07G187400.v1.1	20.58	25.25	28.44	114.84	100.56	131.42	96.07	122.14	85.72	107.54	134.4	113.14	118.73	81.22	132.15	71.76	60.01	59.86	2.75	3.79	6.78	55.69	46.75	44.05	56.57	53.84	69.85	101.41	73.81	70.94	86.72	103.87	107.67	58.29	57.03	98.6
CiPaw.10G118500.v1.1	15.94	13.65	11.76	267.47	217.3	335.65	189.05	212.66	189.75	128.76	155.15	162.48	109.66	68.82	92.15	47.19	79.87	52.93	9.15	12.34	11.62	24.17	35.33	24.88	56.84	32.75	57.04	38.88	36.54	44.23	59.99	69.31	43.65	36.75	37.39	52.48
CiPaw.01G254200.v1.1	148.44	129.21	131.87	90.88	123.62	111.53	104.62	117.04	103.67	132.71	109.16	113.48	147.48	184.11	158.85	265.81	250.82	261.27	122.6	114.52	100.13	98.2	99.69	138.73	116.43	95.5	102.58	132.89	147.17	207.87	252.05	468.47	226.64	369.65	320.98	303.7
CiPaw.01G112700.v1.1	77.61	88.7	81.77	216.18	208.34	187.98	150.84	164.47	159.2	165.4	182.68	153.59	121.06	98.71	111.23	89.38	101.75	101.17	88.54	85.57	78.62	182.59	189.05	152.18	137.97	135.88	129.44	112.1	106.61	109.55	87.46	98.04	88.35	124.14	126.63	108.73
CiPaw.07G163300.v1.1	77.09	60.26	55.86	159.02	128.23	120.2	196.7	158.22	170.38	122.06	113.49	124.74	233.4	138.85	183	96.41	129.54	151.25	124.71	141.16	154.01	160.29	141.16	187.38	152.65	124.74	109.52	111.93	95.53	63.37	107.31	133.12	124.03	60.17	66.77	56.05
CiPaw.13G107700.v1.1	306.82	346.2	312.13	536.34	561.14	470.12	389.52	367.69	377.67	329.36	331.35	331.55	312.71	314.09	307.16	283.36	333.39	302.58	334.02	317.31	325.54	495.99	551.46	478.45	392.56	363.4	357.65	320.14	353.66	342.11	289.02	294.15	270.51	344.47	397.96	336.97
CiPaw.03G079700.v1.1	100.16	86.58	74.74	55.65	68.66	60.57	102	100.01	101.92	89.94	82.67	72.2	103.54	139.27	129.69	93.42	89.5	87.06	171.98	199.99	177.59	173.51	116.86	117.17	139.31	169.62	120.82	155.55	149.31	178.31	112.85	92.38	138.84	101.79	149.57	156.08
CiPaw.11G147700.v1.1	274.49	333.57	276.68	106.82	125.87	107.11	146.19	141.52	144.24	161.1	150.58	132.73	163.96	148.98	161.11	208.36	168.82	197.9	404.51	438.79	360.68	170.48	158.6	163.8	193.52	175.99	209.72	188.44	204.14	163.77	191.17	146.08	206.99	265.39	177.51	206.92
CiPaw.16G009200.v1.1	146.15	150.17	157.71	394.38	380.91	468.78	180.58	222.76	163.75	214.95	185.45	141.46	119.53	94.01	99.03	173.53	166.46	130.98	117.02	129.31	169.11	272.95	239.36	257.41	152.6	133	154.93	105.58	100.94	102.41	113.42	162.4	93.7	156.88	183.61	179.56
CiPaw.01G003500.v1.1	117.95	106.33	89.01	106.95	139.22	85.83	49.73	35.04	55.84	33.54	49.86	45.31	49.33	117.19	75.81	139.57	112.01	135	50.47	50.79	67.56	213.43	182.01	170.81	68.6	102.52	61.68	63.72	52.61	78.1	77.62	95.82	59	119.55	112.97	73.74
CiPaw.07G115400.v1.1	55.08	60.12	63.81	71.86	57.21	57.29	48.32	48.25	47.96	42.51	43.38	36.62	74.55	94.02	74.73	58.15	127.02	104.89	160.21	133.45	133.56	111.61	109.87	133.8	100.02	80.69	61.8	57.88	77.96	56.91	141.36	96.44	106.67	117.08	160.32	121.76
CiPaw.05G262800.v1.1	61.99	62.43	61.96	16.37	17.59	12.79	11.08	11.2	13.27	14.49	18.82	29.53	116.19	112.56	103.88	90.6	94.58	126.66	49.53	50.61	49.72	10.76	11.85	11.91	11.62	16.15	13.12	29.67	41.67	18.47	73.59	86.49	88.58	85.73	40.78	57.74
CiPaw.11G062900.v1.1	257.59	307.87	307.53	286.63	305.25	275.78	238.57	230.41	230.81	223.95	214.38	209.84	228.87	268.7	244.89	238.3	247.89	244.02	323.86	306.21	297.22	286.82	306.75	300.85	263.53	322.68	293.71	258.22	245.48	267.15	238.43	240.81	236.75	317.81	262.72	229.85
CiPaw.04G129400.v1.1	157.27	140.43	165.68	82.56	54.78	65.15	131.94	149.82	165.98	119.77	94.52	113.19	172.22	123.21	163.29	141.1	125.8	131.72	67.31	93.19	95.71	82.43	79.22	84.8	136.18	165.43	173.78	126.88	122.67	139.06	116.68	136.67	122.97	105.36	81.52	92.93
CiPaw.15G020000.v1.1	0.61	6.22	0.74	88.99	59.75	163.11	74.68	41.44	33.55	71.71	46.77	48.19	89.82	86.85	126.58	36.99	47.95	65.89	0	0	0	2.64	7.83	4.51	21.15	19.45	26.51	62.1	17.58	40.21	46.23	59.35	33.43	97.75	41.77	0.69
CiPaw.15G178300.v1.1	323.78	297.97	376.18	24.86	23.41	13.9	9.57	35.51	15.96	33.22	27.71	40.53	123.89	105.37	164.72	75.25	165.59	147.03	22	19.34	16.18	25.45	26.98	26.99	34.69	49.16	28.23	81.38	105.23	66.6	46.78	107.65	91.43	45.03	109.26	62.49
CiPaw.03G227600.v1.1	94.66	89.74	94.7	116.18	112.6	116.73	153.28	159.97	162.57	186.44	177.62	187.6	173.97	112.72	146.18	115.1	104.07	131.21	128.6	130.77	131.68	151.34	164.38	178.93	151.73	157.68	160.46	193.07	183.32	161.21	112.89	107.13	131.92	89.75	78.16	82.89
CiPaw.04G048900.v1.1	81.85	74.76	72.67	126.83	139.68	109.5	100.07	88.69	96.68	85.63	81.37	80.86	68.84	110.44	94.24	75.51	101.56	100.56	82.16	74.39	77.65	185.92	189.53	192.61	149.54	140.82	140.34	93.58	112.97	124.86	152.6	211.68	133.54	163.57	172.88	145.45
CiPaw.07G155100.v1.1	115.93	148.82	135.37	2.73	4.25	2.74	15.92	10.79	9.68	13.1	9.43	8.48	14.34	28.46	19.12	36.56	23.43	26.11	220.18	206	178.9	60.99	67.08	50.72	46.37	83.46	67.01	67.18	103.38	66.66	26.27	24.72	49.81	41.11	28.38	55.91
CiPaw.01G199700.v1.1	68.88	71.1	79.89	131.98	108.56	154.95	193.34	264.55	210.92	212.07	221.87	214.47	143.56	130.3	144.9	84.36	110.45	104.79	58.7	57.89	55.96	89.21	92.86	92.58	132.29	124.57	147.11	155.44	140.75	148.67	119.44	124.13	109.53	107.28	104.79	108.43
CiPaw.01G290500.v1.1	110.57	102.4	112.53	49.79	45.48	37.5	115.12	106.05	126.27	104.53	112.83	111.63	52.04	60.83	54.62	78.63	65.09	72.86	101.03	89.44	77.79	63.3	63.4	65.98	123.37	107.57	127.39	106.37	125.27	110.5	57	37.93	72.81	39.26	50.27	67.29
CiPaw.04G186300.v1.1	47.1	42.3	49.1	166.04	131.35	160.86	79.34	126.09	73.29	128.09	89.64	89.98	138.02	137.97	134.05	199.18	110.85	113.04	38.38	71.96	153.88	124.88	132.92	132.67	80.65	84.37	71.95	120.08	100.13	141.16	121.62	283.79	152.91	97.59	135.43	149.36
CiPaw.15G063900.v1.1	27.01	30.37	22.52	19.75	30.01	21.65	213	104.74	170.31	87.6	78.76	96.97	59.9	82.37	82.63	158.47	113.11	114.17	19.04	23.2	35.76	72.72	31.28	28.75	75.34	74.61	54.28	102.85	78.46	87.84	56.27	102.87	74.36	52.85	75.97	94.07
CiPaw.04G178500.v1.1	59.71	74.47	64.66	12.65	15.14	11.09	20.83	18.63	18.95	20.58	17.93	22.3	83.21	89.84	67.9	115.72	99.34	112.18	157.95	162.29	154.24	42.7	37.49	49.66	28.43	38.3	26.76	30.94	36.87	27.15	63.75	104.95	76.52	64.09	48.29	80.52
CiPaw.08G123900.v1.1	112.48	147.96	130.4	23.71	27.65	20.43	64.51	69.03	41.54	25.63	26.35	41.68	53.25	108.74	80.2	59.3	69.88	47.22	144.7	128.98	128.55	52.57	35.89	34.77	152.02	148.12	93.25	73.66	58.44	62.02	87.93	63.08	79.16	72.64	83.1	98.29
CiPaw.15G053300.v1.1	74.8	76.66	68.34	1.98	3.55	3.39	7.62	6.58	7.9	6.81	3.81	4.93	32.09	59.99	38.94	40.81	40.98	38.99	186.89	237.25	185.83	13.61	8.28	7.51	12.65	16.43	14.45	17.61	42.75	29.14	44.95	39.11	63.3	134.01	82.88	158.57
CiPaw.07G021300.v1.1	62.17	69.86	57.14	26.3	27.78	25.13	22.9	22.08	15.58	29.13	27.6	29.85	142.87	107.61	142.09	109.55	92.25	59.05	43.23	52.87	45.64	76.4	53.31	47.96	48.03	42.64	52.89	68.22	85.53	64.12	140.6	105.77	169.71	58.29	71.16	145.87
CiPaw.16G051000.v1.1	130.31	130.36	125.66	94.67	132.85	118.93	57.07	73.53	60.34	86.08	79.17	81.96	138.29	184.13	168.84	156.19	137.33	139.9	110.08	112.98	134.59	97.38	101.85	85.71	89.42	82.45	92.68	127.08	132.18	124.59	153	187.72	179.83	134.22	146.26	187.21
CiPaw.09G207000.v1.1	12.64	14.53	11.37	37.9	42.63	38.3	11.99	4.05	7.74	15.43	19.72	13.04	10.62	36.87	14.15	105.08	155.82	64.06	54.99	71.76	164.94	838.27	376.91	372.04	36.61	82.8	42.94	56.1	56.62	63.52	25.97	122.88	34.19	54.56	58.76	65.68
CiPaw.02G060600.v1.1	181.98	161.6	164.45	111.78	91.22	102.32	73.55	74.53	89.68	72.42	80.07	59.92	57.04	31.46	46.9	72.65	51.4	53.22	101.26	109.22	131.3	275.96	252.47	224.21	109.96	97.83	94.8	70.31	68.44	79.13	26.76	34.51	38.91	26.94	44.56	25.39
CiPaw.06G042500.v1.1	0.65	0.51	1.05	113.8	99.26	116.28	121.06	160.3	136.74	104.83	157.94	99.65	28.96	28.6	27.74	37.95	18.9	18.31	0.29	0.21	0.64	62.08	66.58	68.31	48.93	37.08	56.44	28.62	19.85	34.77	15.58	25.77	13	11.27	9.88	8.95
CiPaw.06G106200.v1.1	61.59	44	70.78	93.54	106.75	103.25	59.69	99.33	82.63	100.78	117.72	82.81	46.32	51.58	56.12	104.63	69.65	65.54	25.1	24.91	26	150.45	141.39	135.73	60.86	69.76	74.82	71.1	89.22	91.04	16.6	8.64	18.19	12.44	14.83	17.82
CiPaw.07G175400.v1.1	15.71	15.25	19.54	70.99	78.06	83.49	177.39	278.09	306.45	270.37	280.11	266.39	60.43	35.42	66.1	47.97	32.34	35.36	6.21	7.87	7.37	31	38.88	47.77	92.85	58.48	131.85	54.16	36.48	85.67	17.97	10.05	14.73	16.39	29	17.74
CiPaw.02G034100.v1.1	14.7	15.77	17.88	52.61	93.02	58.55	159.95	152.31	157.23	100.93	139.4	122.96	89.74	59.01	102.31	95.79	96.06	76.24	21.17	13.93	13.51	30.18	29.98	20.96	31.35	49.83	49.63	33.39	46.09	51.25	33	13.63	42.55	22.54	46.44	25.99
CiPaw.07G083200.v1.1	77.12	90.74	76.42	216.56	202.75	195.69	158.62	167.43	168.06	122.81	161.35	143.7	148.01	139.79	132.57	92.77	122.01	107.88	99.87	88.31	78.22	182.13	177.86	172.05	166.76	125.66	104.68	100.43	107.27	119.24	116.53	121.73	114.96	87.42	112.5	109.26
CiPaw.01G012800.v1.1	76.88	61.46	62.98	99.81	99.94	116.57	166.08	218.55	184.55	196.87	201.27	202.28	116.06	128.21	105.5	173.16	146.7	136.49	69.29	80.37	115.49	89.84	86.54	86.52	139.44	145.35	148.99	136.37	102.78	137.67	99.45	92.68	109.71	102.91	74.48	120.34
CiPaw.12G140300.v1.1	141.04	140.84	139.08	260.01	273.71	279.24	215.94	235.22	223.2	220.22	211.07	205.79	180.77	152.75	160.82	176.78	166.74	163.02	191.62	179.22	185.92	246.97	256.84	241.57	189.5	195.94	214.3	205.53	174.94	165.73	167.36	169.97	158.51	253.98	228.07	196.96
[truncated: 14,879 more rows]

## Sheet: Table S3
Table S3 Physio-chemical characteristics of CiRR family genes
[truncated: 21 more rows]

## Sheet: Table S4
Table S3 Ka/Ks analysis for duplicated gene pairs of CiRRs
[truncated: 10 more rows]

[truncated: 2 more sheets: Table S5, Table S6]
